# Supplementary material for: Identification of type 2 diabetes- and obesity-associated human β-cells using deep transfer learning
Source: bioRxiv preprint, doi:10.1101/2024.01.18.576260, version 2 (2025-07-22)
Supplement: Table S2 [file 576260_file16.xlsx]

## Sheet: readme
Table S2. Marselli metadata, edgeR results, comparison to Asplund
Sheet title	related to figure	Description
marselli_metadata		Human islet metadata from Marselli et al.
edgeR_lrt_marselli_counts	Fig 1D,E	edgeR results on T2D vs ND human islet RNAseq data from Marselli et al.
asplund_data		All differentially expressed genes in T2D human islets vs ND human islets from Asplund et al.
marselli_vs_asplund_deg_merge	Fig 1G	Comparison of fold-changes in gene expression between Asplund et al and Marselli et al T2D vs ND human islets
t2d_effector_summary		All T2DKP effectors downloaded from the T2D Knowledge Portal
t2dkp_vs_marselli	Fig 1H	T2D effetors that are also differentially-expressed in T2D in marselli RNAseq data

## Sheet: marselli_metadata
SAMN_and_disease	GSM_id	SAMN_ID	disease_status	alt_id_1	alt_id_2	alt_id_3	donor_diabetic_type	sex	age	bmi	diabetic_type	cause_death_code	po	ICU glycemia (mg/dl)	disease	Diabetes duration (years)	Anti-diabetic therapy	Cause of death	CIT (h)
SAMN16533328_ND	GSM4852087	SAMN16533328	ND	PISA-L21686	Human islets 27 from non-diabetic donor	17/20	ND	M	22	19.59	ND	Trauma	PO796	198	ND	-	-	Trauma	19
SAMN16533320_ND	GSM4852092	SAMN16533320	ND	PISA-L21693	Human islets 32 from non-diabetic donor	18/4	ND	F	27	24.98	ND	Trauma	PO841	139	ND	-	-	Trauma	24
SAMN16533419_ND	GSM4852075	SAMN16533419	ND	PISA-L13349	Human islets 15 from non-diabetic donor	19/26	ND	F	28	20.2	ND	CVD	PO907	69	ND	-	-	CVD	20
SAMN16533323_ND	GSM4852095	SAMN16533323	ND	PISA-L21696	Human islets 35 from non-diabetic donor	18/22	ND	M	33	21.8	ND	CVD	PO858	139	ND	-	-	CVD	13
SAMN16533404_ND	GSM4852063	SAMN16533404	ND	PISA-L13334	Human islets 3 from non-diabetic donor	17/7	ND	M	39	32.65	ND	CVD	PO784	142	ND	-	-	CVD	16
SAMN16533346_ND	GSM4852109	SAMN16533346	ND	ULB-CTL101208	Human islets 49 from non-diabetic donor	14/46	ND	M	40	26.2	NA	NA	NA	164	ND	-	-	Trauma	19
SAMN16533343_ND	GSM4852112	SAMN16533343	ND	ULB-CTL160606	Human islets 52 from non-diabetic donor	12/34	ND	F	46	25	NA	NA	NA	135	ND	-	-	Trauma	12
SAMN16533432_ND	GSM4852066	SAMN16533432	ND	PISA-L13339	Human islets 6 from non-diabetic donor	18/17	ND	F	50	21.48	ND	CVD	PO854	173	ND	-	-	CVD	17
SAMN16533324_ND	GSM4852094	SAMN16533324	ND	PISA-L21695	Human islets 34 from non-diabetic donor	18/12	ND	M	50	22.4	ND	CVD	PO849	136	ND	-	-	CVD	20
SAMN16533427_ND	GSM4852070	SAMN16533427	ND	PISA-L13343	Human islets 10 from non-diabetic donor	18/42	ND	M	51	26.23	ND	Trauma	PO876	NA	ND	-	-	Trauma	16
SAMN16533392_ND	GSM4852065	SAMN16533392	ND	PISA-L13338	Human islets 5 from non-diabetic donor	17/66	ND	F	52	23.44	ND	CVD	PO828	96	ND	-	-	CVD	24
SAMN16533314_ND	GSM4852101	SAMN16533314	ND	PISA-L21702	Human islets 41 from non-diabetic donor	19/27	ND	M	52	30	ND	CVD	PO908	NA	ND	-	-	CVD	13
SAMN16533322_ND	GSM4852090	SAMN16533322	ND	PISA-L21689	Human islets 30 from non-diabetic donor	17/42	ND	F	53	20.76	ND	CVD	PO813	144	ND	-	-	CVD	17
SAMN16533321_ND	GSM4852091	SAMN16533321	ND	PISA-L21691	Human islets 31 from non-diabetic donor	17/75	ND	F	53	41.87	ND	Trauma	PO836	191	ND	-	-	Trauma	12
SAMN16533317_ND	GSM4852098	SAMN16533317	ND	PISA-L21699	Human islets 38 from non-diabetic donor	18/50	ND	M	53	27.78	ND	CVD	PO882	76	ND	-	-	CVD	15
SAMN16533339_ND	GSM4852116	SAMN16533339	ND	ULB-CTL220606	Human islets 56 from non-diabetic donor	12/35	ND	M	53	NA	NA	NA	NA	125	ND	-	-	NA	NA
SAMN16533326_ND	GSM4852089	SAMN16533326	ND	PISA-L21688	Human islets 29 from non-diabetic donor	17/41	ND	F	56	22.49	ND	CVD	PO812	156	ND	-	-	CVD	14
SAMN16533348_ND	GSM4852107	SAMN16533348	ND	ULB-CTL010911	Human islets 47 from non-diabetic donor	17/53	ND	M	56	24.7	NA	NA	NA	142	ND	-	-	CVD	15
SAMN16533430_ND	GSM4852068	SAMN16533430	ND	PISA-L13341	Human islets 8 from non-diabetic donor	18/19	ND	F	58	24.22	ND	CVD	PO856	173	ND	-	-	CVD	18
SAMN16533397_ND	GSM4852061	SAMN16533397	ND	PISA-L13332	Human islets 1 from non-diabetic donor	16/34	ND	M	59	19.39	ND	Trauma	PO764	158	ND	-	-	Trauma	20
SAMN16533353_ND	GSM4852102	SAMN16533353	ND	PISA-L21703	Human islets 42 from non-diabetic donor	19/29	ND	M	59	27.7	ND	Trauma	PO909	156	ND	-	-	Trauma	16
SAMN16533316_ND	GSM4852099	SAMN16533316	ND	PISA-L21700	Human islets 39 from non-diabetic donor	19/4	ND	M	61	24.77	ND	CVD	PO889	126	ND	-	-	CVD	18
SAMN16533434_ND	GSM4852082	SAMN16533434	ND	PISA-L16192	Human islets 22 from non-diabetic donor	18/5	ND	M	61	32.41	ND	CVD	PO842	145	ND	-	-	CVD	10
SAMN16533342_ND	GSM4852113	SAMN16533342	ND	ULB-CTL190110	Human islets 53 from non-diabetic donor	16/4	ND	F	62	24.8	NA	NA	NA	145	ND	-	-	Trauma	7
SAMN16533315_ND	GSM4852100	SAMN16533315	ND	PISA-L21701	Human islets 40 from non-diabetic donor	19/18	ND	M	63	26.8	ND	CVD	PO900	151	ND	-	-	CVD	16
SAMN16533350_ND	GSM4852105	SAMN16533350	ND	PISA-L21708	Human islets 45 from non-diabetic donor	20/26	ND	F	64	21.3	ND	CVD	PO954	136	ND	-	-	CVD	14
SAMN16533340_ND	GSM4852115	SAMN16533340	ND	ULB-CTL220214	Human islets 55 from non-diabetic donor	20/11	ND	F	64	29.4	NA	NA	NA	159	ND	-	-	CVD	20
SAMN16533331_ND	GSM4852084	SAMN16533331	ND	PISA-L16194	Human islets 24 from non-diabetic donor	18/31	ND	M	66	27.78	ND	Trauma	PO865	137	ND	-	-	Trauma	NA
SAMN16533422_ND	GSM4852073	SAMN16533422	ND	PISA-L13347	Human islets 13 from non-diabetic donor	19/8	ND	F	67	23.88	ND	CVD	PO891	145	ND	-	-	CVD	12
SAMN16533344_ND	GSM4852111	SAMN16533344	ND	ULB-CTL150711	Human islets 51 from non-diabetic donor	17/44	ND	M	67	24.2	NA	NA	NA	181	ND	-	-	CVD	13
SAMN16533412_ND	GSM4852079	SAMN16533412	ND	PISA-L16187	Human islets 19 from non-diabetic donor	17/30	ND	F	68	20.76	ND	CVD	PO804	130	ND	-	-	CVD	15
SAMN16533417_ND	GSM4852076	SAMN16533417	ND	PISA-L13352	Human islets 16 from non-diabetic donor	19/72	ND	M	69	26.1	ND	CVD	PO951	141	ND	-	-	CVD	15
SAMN16533428_ND	GSM4852069	SAMN16533428	ND	PISA-L13342	Human islets 9 from non-diabetic donor	18/25	ND	F	71	29.38	ND	CVD	PO860	159	ND	-	-	CVD	20
SAMN16533435_ND	GSM4852081	SAMN16533435	ND	PISA-L16191	Human islets 21 from non-diabetic donor	17/70	ND	M	71	25.39	ND	Trauma	PO831	63	ND	-	-	Trauma	14
SAMN16533421_ND	GSM4852074	SAMN16533421	ND	PISA-L13348	Human islets 14 from non-diabetic donor	19/15	ND	F	72	22.03	ND	CVD	PO897	187	ND	-	-	CVD	18
SAMN16533394_ND	GSM4852064	SAMN16533394	ND	PISA-L13337	Human islets 4 from non-diabetic donor	17/65	ND	F	72	23.88	ND	CVD	PO827	185	ND	-	-	CVD	15
SAMN16533319_ND	GSM4852096	SAMN16533319	ND	PISA-L21697	Human islets 36 from non-diabetic donor	18/35	ND	M	74	26.12	ND	CVD	PO869	163	ND	-	-	CVD	15
SAMN16533352_ND	GSM4852103	SAMN16533352	ND	PISA-L21704	Human islets 43 from non-diabetic donor	19/34	ND	F	76	19.5	ND	CVD	PO914	66	ND	-	-	CVD	17
SAMN16533329_ND	GSM4852086	SAMN16533329	ND	PISA-L21685	Human islets 26 from non-diabetic donor	17/4	ND	M	76	24.22	ND	Trauma	PO782	102	ND	-	-	Trauma	19
SAMN16533330_ND	GSM4852085	SAMN16533330	ND	PISA-L21684	Human islets 25 from non-diabetic donor	17/2	ND	M	77	24.22	ND	CVD	PO780	NA	ND	-	-	CVD	18
SAMN16533337_ND	GSM4852117	SAMN16533337	ND	ULB-CTL290114	Human islets 57 from non-diabetic donor	20/5	ND	M	77	24.5	NA	NA	NA	101	ND	-	-	CVD	16
SAMN16533336_ND	GSM4852118	SAMN16533336	ND	ULB-CTL300609	Human islets 58 from non-diabetic donor	15/40	ND	M	77	25.2	NA	NA	NA	120	ND	-	-	CVD	NA
SAMN16533318_ND	GSM4852097	SAMN16533318	ND	PISA-L21698	Human islets 37 from non-diabetic donor	18/37	ND	F	78	25.34	ND	CVD	PO871	142	ND	-	-	CVD	8
SAMN16533414_ND	GSM4852078	SAMN16533414	ND	PISA-L16186	Human islets 18 from non-diabetic donor	17/22	ND	M	78	23.88	ND	CVD	PO798	184	ND	-	-	CVD	23
SAMN16533425_ND	GSM4852071	SAMN16533425	ND	PISA-L13345	Human islets 11 from non-diabetic donor	18/46	ND	F	79	25.71	ND	CVD	PO880	175	ND	-	-	CVD	14
SAMN16533327_ND	GSM4852088	SAMN16533327	ND	PISA-L21687	Human islets 28 from non-diabetic donor	17/37	ND	F	79	27.55	ND	CVD	PO809	173	ND	-	-	CVD	14
SAMN16533345_ND	GSM4852110	SAMN16533345	ND	ULB-CTL140912	Human islets 50 from non-diabetic donor	18/45	ND	F	79	29.7	NA	NA	NA	116	ND	-	-	CVD	18
SAMN16533349_ND	GSM4852106	SAMN16533349	ND	PISA-L21709	Human islets 46 from non-diabetic donor	20/82	ND	M	79	25.3	ND	CVD	PO956	124	ND	-	-	CVD	11
SAMN16533431_ND	GSM4852067	SAMN16533431	ND	PISA-L13340	Human islets 7 from non-diabetic donor	18/18	ND	F	80	19.53	ND	CVD	PO855	126	ND	-	-	CVD	14
SAMN16533325_ND	GSM4852093	SAMN16533325	ND	PISA-L21694	Human islets 33 from non-diabetic donor	18/8	ND	F	80	23.44	ND	CVD	PO845	NA	ND	-	-	CVD	17
SAMN16533424_ND	GSM4852072	SAMN16533424	ND	PISA-L13346	Human islets 12 from non-diabetic donor	19/2	ND	F	81	20.2	ND	CVD	PO887	130	ND	-	-	CVD	17
SAMN16533395_ND	GSM4852062	SAMN16533395	ND	PISA-L13333	Human islets 2 from non-diabetic donor	16/35	ND	F	81	24.97	ND	CVD	PO765	153	ND	-	-	CVD	12
SAMN16533347_ND	GSM4852108	SAMN16533347	ND	ULB-CTL061011ab	Human islets 48 from non-diabetic donor	17/62	ND	F	81	25.9	NA	NA	NA	163	ND	-	-	CVD	16
SAMN16533436_ND	GSM4852080	SAMN16533436	ND	PISA-L16189	Human islets 20 from non-diabetic donor	17/54	ND	F	81	27.34	ND	CVD	PO819	133	ND	-	-	CVD	17
SAMN16533415_ND	GSM4852077	SAMN16533415	ND	PISA-L13354	Human islets 17 from non-diabetic donor	21/29	ND	F	82	30.1	ND	CVD	PO957	NA	ND	-	-	CVD	16
SAMN16533351_ND	GSM4852104	SAMN16533351	ND	PISA-L21707	Human islets 44 from non-diabetic donor	20/8	ND	M	82	24.5	ND	CVD	PO952	143	ND	-	-	CVD	17
SAMN16533341_ND	GSM4852114	SAMN16533341	ND	ULB-CTL190512	Human islets 54 from non-diabetic donor	18/20	ND	M	83	25.9	NA	NA	NA	147	ND	-	-	Trauma	18
SAMN16533332_ND	GSM4852083	SAMN16533332	ND	PISA-L16193	Human islets 23 from non-diabetic donor	18/11	ND	F	86	33.06	ND	CVD	PO848	198	ND	-	-	CVD	18
SAMN16533409_T2D	GSM4852053	SAMN16533409	T2D	ULB-T2D080911	Human islets 21 from type 2 diabetic donor	17/55	T2D	F	53	33.1	NA	NA	NA	138	T2D	7	Metformin	CVD	12
SAMN16533384_T2D	GSM4852034	SAMN16533384	T2D	PISA-L13336	Human islets 2 from type 2 diabetic donor	17/64	T2D	M	61	24.62	T2D	Trauma	PO826	177	T2D	10	Metformin, Sulfonylurea	Trauma	14
SAMN16533379_T2D	GSM4852039	SAMN16533379	T2D	PISA-L16178	Human islets 7 from type 2 diabetic donor	17/43	T2D	M	62	33.06	T2D	CVD	PO814	171	T2D	5	Metformin	CVD	12
SAMN16533391_T2D	GSM4852049	SAMN16533391	T2D	PISA-L21711	Human islets 17 from type 2 diabetic donor	22/89	T2D	M	64	27.8	T2D	Trauma	PO981	147	T2D	NA	Diet	Trauma	15
SAMN16533403_T2D	GSM4852057	SAMN16533403	T2D	ULB-T2D180112	Human islets 25 from type 2 diabetic donor	18/2	T2D	F	67	33.8	NA	NA	NA	186	T2D	4	Metformin	CVD	17
SAMN16533378_T2D	GSM4852040	SAMN16533378	T2D	PISA-L16180	Human islets 8 from type 2 diabetic donor	18/52	T2D	M	68	27.55	T2D	CVD	PO884	93	T2D	NA	Diet	CVD	14
SAMN16533400_T2D	GSM4852059	SAMN16533400	T2D	ULB-T2D261010	Human islets 27 from type 2 diabetic donor	16/45	T2D	M	69	27.7	NA	NA	NA	151	T2D	5	Sulfonylurea	Trauma	13
SAMN16533356_T2D	GSM4852046	SAMN16533356	T2D	PISA-L21705	Human islets 14 from type 2 diabetic donor	19/69	T2D	M	72	23.4	T2D	CVD	PO944	165	T2D	12	Metformin, Sulfonylurea	CVD	24
SAMN16533386_T2D	GSM4852045	SAMN16533386	T2D	PISA-L21692	Human islets 13 from type 2 diabetic donor	17/78	T2D	M	72	24.22	T2D	CVD	PO837	420	T2D	11	Metformin, Sulfonylurea	CVD	9
SAMN16533407_T2D	GSM4852055	SAMN16533407	T2D	ULB-T2D111110	Human islets 23 from type 2 diabetic donor	16/50	T2D	M	72	32.4	NA	NA	NA	224	T2D	12	Insulin	CVD	NA
SAMN16533382_T2D	GSM4852036	SAMN16533382	T2D	PISA-L13351	Human islets 4 from type 2 diabetic donor	19/85	T2D	F	73	18	T2D	CVD	PO947	188	T2D	NA	Metformin	CVD	18
SAMN16533402_T2D	GSM4852058	SAMN16533402	T2D	ULB-T2D230111	Human islets 26 from type 2 diabetic donor	17/5	T2D	F	73	27.3	NA	NA	NA	214	T2D	30	Metformin, Sulfonylurea	CVD	11
SAMN16533354_T2D	GSM4852048	SAMN16533354	T2D	PISA-L21710	Human islets 16 from type 2 diabetic donor	22/55	T2D	M	73	25.5	T2D	CVD	PO969	161	T2D	10	Metformin	CVD	20
SAMN16533377_T2D	GSM4852041	SAMN16533377	T2D	PISA-L16182	Human islets 9 from type 2 diabetic donor	16/25	T2D	F	74	29.38	T2D	CVD	PO761	271	T2D	10	Metformin	CVD	NA
SAMN16533383_T2D	GSM4852035	SAMN16533383	T2D	PISA-L13350	Human islets 3 from type 2 diabetic donor	19/61	T2D	M	74	27.2	T2D	CVD	PO937	138	T2D	9	Metformin, Sulfonylurea	CVD	12
SAMN16533408_T2D	GSM4852054	SAMN16533408	T2D	ULB-T2D101208	Human islets 22 from type 2 diabetic donor	14/45	T2D	F	75	29.4	NA	NA	NA	153	T2D	2	NA	CVD	13
SAMN16533389_T2D	GSM4852051	SAMN16533389	T2D	PISA-L21713	Human islets 19 from type 2 diabetic donor	23/48	T2D	M	75	26.4	T2D	CVD	PO006	222	T2D	NA	Metformin	CVD	18
SAMN16533385_T2D	GSM4852033	SAMN16533385	T2D	PISA-L13331	Human islets 1 from type 2 diabetic donor	16/9	T2D	M	76	24.49	T2D	CVD	PO755	278	T2D	7	Metformin, Sulfonylurea	CVD	13
SAMN16533411_T2D	GSM4852042	SAMN16533411	T2D	PISA-L16188	Human islets 10 from type 2 diabetic donor	17/39	T2D	M	76	26.12	T2D	Trauma	PO811	165	T2D	14	NA	Trauma	NA
SAMN16533410_T2D	GSM4852043	SAMN16533410	T2D	PISA-L16190	Human islets 11 from type 2 diabetic donor	17/59	T2D	M	78	24.49	T2D	CVD	PO822	303	T2D	9	Metformin, Sulfonylurea	CVD	48
SAMN16533387_T2D	GSM4852044	SAMN16533387	T2D	PISA-L21683	Human islets 12 from type 2 diabetic donor	16/49	T2D	M	78	25.95	T2D	Trauma	PO771	203	T2D	25	Sulfonylurea	Trauma	13
SAMN16533390_T2D	GSM4852050	SAMN16533390	T2D	PISA-L21712	Human islets 18 from type 2 diabetic donor	22/97	T2D	M	78	27.7	T2D	CVD	PO983	251	T2D	25	Acarbose, Metformin, Sulfonylurea	CVD	20
SAMN16533398_T2D	GSM4852060	SAMN16533398	T2D	ULB-T2D310311	Human islets 28 from type 2 diabetic donor	17/21	T2D	M	79	24.7	NA	NA	NA	211	T2D	8	Metformin, Sulfonylurea	CVD	12
SAMN16533381_T2D	GSM4852037	SAMN16533381	T2D	PISA-L13353	Human islets 5 from type 2 diabetic donor	20/78	T2D	F	81	23.4	T2D	CVD	PO955	173	T2D	18	Metformin, Sulfonylurea	CVD	14
SAMN16533355_T2D	GSM4852047	SAMN16533355	T2D	PISA-L21706	Human islets 15 from type 2 diabetic donor	20/16	T2D	M	82	22.9	T2D	CVD	PO949	144	T2D	NA	Metformin	CVD	20
SAMN16533388_T2D	GSM4852052	SAMN16533388	T2D	PISA-L21714	Human islets 20 from type 2 diabetic donor	23/58	T2D	F	84	22.8	T2D	CVD	PO009	180	T2D	15	Metformin	CVD	14
SAMN16533380_T2D	GSM4852038	SAMN16533380	T2D	PISA-L13355	Human islets 6 from type 2 diabetic donor	22/17	T2D	M	92	21.9	T2D	CVD	PO958	350	T2D	NA	Insulin	CVD	16

## Sheet: edgeR_lrt_marselli_counts
genes	logFC	logCPM	LR	PValue	FDR	SAMN16533397_ND	SAMN16533395_ND	SAMN16533404_ND	SAMN16533394_ND	SAMN16533392_ND	SAMN16533432_ND	SAMN16533431_ND	SAMN16533430_ND	SAMN16533428_ND	SAMN16533427_ND	SAMN16533425_ND	SAMN16533424_ND	SAMN16533422_ND	SAMN16533421_ND	SAMN16533419_ND	SAMN16533417_ND	SAMN16533415_ND	SAMN16533414_ND	SAMN16533412_ND	SAMN16533436_ND	SAMN16533435_ND	SAMN16533434_ND	SAMN16533332_ND	SAMN16533331_ND	SAMN16533330_ND	SAMN16533329_ND	SAMN16533328_ND	SAMN16533327_ND	SAMN16533326_ND	SAMN16533322_ND	SAMN16533321_ND	SAMN16533320_ND	SAMN16533325_ND	SAMN16533324_ND	SAMN16533323_ND	SAMN16533319_ND	SAMN16533318_ND	SAMN16533317_ND	SAMN16533316_ND	SAMN16533315_ND	SAMN16533314_ND	SAMN16533353_ND	SAMN16533352_ND	SAMN16533351_ND
GABRA2	-2.48278	-0.577688	25.0141	5.69138e-07	0.00350811	12	7	10	95	99	3	33	3	51	4	10	41	6	64	5	0	24	12	19	11	6	16	12	0	11	13	12	50	83	12	0	5	12	24	0	0	47	0	0	0	2	13	60	17
TMEM119	1.73993	0.607342	24.7482	6.5329e-07	0.00350811	15	53	55	26	19	7	5	11	1	2	4	5	27	15	20	23	73	8	5	7	0	50	17	5	11	57	3	18	35	14	9	7	33	41	0	9	12	0	17	17	5	7	5	9
SPN	1.83365	-1.02479	24.6485	6.88e-07	0.00350811	3	2	4	2	1	11	1	14	0	5	4	4	0	4	8	5	2	2	2	2	0	0	0	2	20	1	5	4	6	3	10	1	1	3	3	6	8	7	1	2	3	3	2	1
PID1	0.812622	2.37679	22.7857	1.81113e-06	0.00692621	84	175	162	266	116	106	100	45	28	26	80	83	80	100	112	70	566	80	174	89	10	109	80	57	108	105	105	105	213	132	59	112	66	114	37	91	87	70	105	80	46	110	163	165
MUC5AC	2.9801	0.6167	21.799	3.02763e-06	0.00926274	1	36	4	8	2	13	29	0	11	0	18	0	0	0	5	1	3	5	0	3	0	0	8	0	0	6	0	0	1	1	2	11	1	15	0	7	7	10	56	12	0	1	2	1
IL1B	1.25584	4.05338	21.1521	4.2423e-06	0.0108158	592	974	455	1122	174	177	339	411	144	62	243	98	635	184	365	201	972	174	1514	38	253	260	113	443	1019	331	322	25	110	187	345	526	187	447	253	136	137	234	93	161	96	39	305	370
RGS6	1.35468	-0.63618	20.7278	5.29411e-06	0.0115191	5	8	3	19	18	3	8	15	14	1	2	9	4	0	0	0	28	18	17	10	5	7	5	0	2	6	9	31	32	8	13	13	10	10	6	2	10	12	3	26	8	9	6	40
GAD1	0.688813	2.90835	20.298	6.62681e-06	0.0115191	136	159	81	196	259	200	222	224	138	109	149	229	116	149	148	162	188	203	249	54	301	143	85	96	327	189	89	327	176	117	275	230	107	165	121	114	233	249	107	125	73	111	170	283
PAPPA	0.919587	3.87059	20.2551	6.7773e-06	0.0115191	282	558	398	768	290	157	210	355	196	141	102	76	378	225	158	202	1689	336	516	150	158	398	132	256	381	347	221	98	338	340	186	328	166	674	235	144	276	337	365	191	140	216	406	299
PAX4	-2.09697	0.490354	19.2835	1.12675e-05	0.0154019	9	21	38	41	6	0	19	10	27	32	18	34	25	32	63	1	21	20	50	1	1	14	12	0	5	78	6	173	52	1	14	20	29	44	8	43	80	28	3	9	16	39	61	25
SFRP4	1.50955	0.498993	19.0833	1.25134e-05	0.0154019	2	1	33	71	12	15	5	2	6	16	16	51	62	0	16	19	138	22	56	4	0	57	9	6	9	58	13	0	27	27	43	33	25	37	4	9	5	3	46	49	7	4	45	15
GLRB	-0.452524	3.36	19.0506	1.27295e-05	0.0154019	255	241	245	459	361	155	273	274	109	293	237	453	172	236	279	159	451	400	232	151	192	217	268	198	242	248	154	463	313	127	226	224	244	360	290	222	316	310	273	378	226	334	317	340
SLCO2B1	1.16582	1.32515	18.8592	1.4073e-05	0.0154019	11	30	43	38	29	33	17	46	37	16	40	6	41	20	44	58	28	32	34	36	18	50	34	44	98	59	33	35	39	42	72	35	21	59	7	8	31	24	58	35	17	41	32	8
CDH17	-1.43525	3.06778	18.695	1.53382e-05	0.0154019	686	1129	286	75	76	255	554	311	7	175	42	179	86	101	70	63	46	83	262	310	92	80	55	491	149	119	29	229	276	36	71	61	350	1428	89	433	100	1712	39	90	53	122	182	135
IAPP	-1.71452	10.5656	18.6265	1.58996e-05	0.0154019	33032	10291	50352	134978	46005	10215	17845	29613	9052	29068	13811	182971	17819	111068	30056	15927	29164	4219	27651	11934	14173	18466	6331	6423	19905	172375	34491	74802	54736	15888	16798	18646	31109	104501	2819	17508	29412	175171	13374	77472	11974	74601	55444	154746
CYP1B1	0.958573	5.16474	18.6015	1.61097e-05	0.0154019	1186	1514	816	1739	895	519	301	733	329	1039	172	615	868	448	316	378	2061	628	1265	344	325	776	228	248	458	1476	879	385	619	665	1410	636	463	2670	263	540	270	1069	567	434	461	414	901	1242
PIK3R5	1.3319	-0.129275	18.2838	1.90323e-05	0.0168065	0	11	5	14	7	0	0	29	9	10	3	2	3	6	36	22	32	8	23	5	0	16	0	1	5	4	8	13	18	50	10	14	16	12	12	8	10	16	19	4	1	15	2	9
APOE	2.39948	1.93812	18.2107	1.97763e-05	0.0168065	8	4	7	7	10	1	4	8	4	1	1	7	6	3	20	14	4	24	4	4	0	10	6	3	6	2	0	6	10	0	8	6	1	7	1	1	2	5	16	0	4	11	3	6
BCAT2	-0.405342	4.80459	17.8158	2.43348e-05	0.0191748	1368	1117	732	905	906	609	748	687	617	554	772	1029	580	1299	686	514	991	1022	1044	445	655	645	649	678	848	1204	615	995	905	432	689	645	838	844	703	505	707	813	466	742	495	854	719	857
SMAD9	-0.886598	3.85469	17.7592	2.507e-05	0.0191748	194	241	376	525	290	183	283	399	305	285	184	602	68	461	395	107	261	602	662	380	138	315	296	200	397	1241	92	1418	820	296	424	394	1019	702	185	276	1057	340	254	519	340	585	631	860
DMBT1	2.32496	4.39335	17.6303	2.68287e-05	0.0195428	2	59	54	40	26	5	819	67	9	3	43	16	256	632	333	4	10	2	18	36	619	68	1	70	239	3	11	8	112	74	7	78	21	312	138	4	35	1251	13	6	29	263	12	43
ACP5	1.29166	3.18728	17.3067	3.18069e-05	0.0212279	339	170	198	74	104	43	65	65	22	44	62	30	83	108	101	166	117	217	63	37	13	73	48	59	327	133	78	136	345	73	243	71	175	144	36	34	199	89	76	79	66	181	106	148
IRAK3	0.960095	1.14405	17.2535	3.27089e-05	0.0212279	22	75	20	94	79	25	35	21	6	3	16	40	52	0	54	21	193	101	89	27	8	51	22	24	36	19	15	30	37	53	77	71	26	53	7	25	36	15	58	56	41	32	53	36
ENTPD3	-0.720897	6.04181	17.2192	3.33051e-05	0.0212279	2175	2576	1270	2951	2657	1001	1347	2015	1211	1376	2193	4264	2807	2196	2286	2363	1862	1220	1268	1252	667	823	1242	1609	2077	4916	823	2419	1861	1916	2208	1148	1376	1775	1783	2071	1640	2496	1541	2606	1516	2294	1938	2889
PTCHD1	1.49692	-0.0655801	17.0069	3.72441e-05	0.0227889	0	0	1	9	53	0	1	19	2	0	5	13	9	4	0	0	19	49	186	9	16	12	22	12	9	32	6	7	9	11	4	2	41	9	9	21	0	14	29	6	0	3	53	13
MCEMP1	1.41815	-0.254279	16.6084	4.59463e-05	0.0269771	11	47	37	23	7	13	5	36	0	2	6	0	31	2	12	11	15	6	6	1	0	6	33	7	58	4	0	0	5	38	22	3	5	18	14	0	11	25	11	10	8	10	6	30
CYP1A1	1.40402	6.21782	16.5407	4.7616e-05	0.0269771	6100	4501	1390	946	925	366	570	734	92	721	200	281	787	1404	60	162	775	828	851	324	760	820	1425	457	6725	1106	647	635	1586	229	1296	861	693	5073	575	258	364	5036	224	277	157	1009	289	7029
FFAR4	-1.28588	2.09441	16.3762	5.19341e-05	0.0283727	58	38	99	70	208	40	46	110	49	29	59	284	67	137	147	6	84	53	176	41	8	44	31	11	38	163	28	218	161	66	43	52	117	209	6	100	138	135	30	131	37	199	125	78
PROC	-0.98495	0.0120711	16.2234	5.62936e-05	0.0296939	13	23	42	23	46	19	28	34	48	15	22	12	11	71	62	14	26	51	39	13	3	53	8	10	14	41	8	40	53	7	35	12	15	32	7	13	29	5	22	25	22	30	34	32
AGR3	-1.30541	1.97892	15.9705	6.43387e-05	0.0317574	279	303	166	26	73	97	586	191	22	80	69	38	65	280	152	47	10	108	123	161	159	48	106	298	110	8	3	20	295	13	21	58	120	345	193	247	109	656	21	39	167	191	105	28
RPH3A	-1.74889	1.77289	15.8476	6.86526e-05	0.0317574	33	71	55	136	53	9	7	15	0	68	71	71	24	133	7	29	54	10	53	40	20	47	83	33	8	75	17	626	298	32	28	31	195	39	10	53	93	26	6	70	31	181	111	52
PODN	1.23295	1.05084	15.8299	6.92979e-05	0.0317574	42	38	77	24	49	18	22	46	10	9	11	23	5	29	19	7	27	25	36	14	19	28	14	10	11	36	2	35	51	11	16	7	31	5	2	28	41	7	40	34	17	19	37	61
SLA	1.05279	1.27293	15.8093	7.00562e-05	0.0317574	33	122	75	79	35	22	15	51	3	3	23	0	98	104	82	90	77	94	54	8	0	37	8	24	183	59	57	48	72	48	50	83	51	33	63	10	20	15	97	40	32	58	32	17
PCSK9	-1.32645	1.14916	15.7951	7.05859e-05	0.0317574	25	7	27	57	23	26	20	21	45	38	66	52	59	77	62	31	34	39	29	32	13	14	13	23	26	32	14	76	46	20	27	14	20	17	36	24	19	41	4	9	21	44	21	23
KLF9	0.450049	4.63654	15.3895	8.74748e-05	0.037366	493	525	584	1208	896	358	497	539	360	375	480	630	573	751	751	328	1644	772	925	425	339	432	281	580	531	279	410	537	1008	474	504	382	415	598	409	327	563	585	514	422	569	660	458	685
LSP1	1.22604	0.877624	15.3795	8.79373e-05	0.037366	24	38	15	6	12	21	18	13	23	7	23	4	16	34	20	23	14	32	10	20	9	10	7	19	72	26	12	30	74	10	22	14	14	28	6	5	17	20	23	9	21	34	13	18
SLC2A2	-1.31263	3.53606	15.3103	9.12196e-05	0.0377131	425	442	261	954	1430	98	191	292	154	243	105	1362	296	528	237	86	516	193	797	64	126	173	66	116	133	858	231	364	418	175	159	236	90	785	42	279	267	543	128	888	230	258	487	853
BASP1	0.889094	2.03144	15.2105	9.61658e-05	0.0377967	58	94	120	150	88	40	92	55	31	23	63	61	115	35	118	86	243	129	79	57	0	89	25	31	64	87	53	72	191	109	108	79	49	72	22	37	57	25	55	60	131	71	128	54
MYOM2	-0.819779	1.4588	15.2066	9.63635e-05	0.0377967	76	184	124	101	109	40	73	87	61	136	91	30	75	100	104	80	128	64	74	66	58	182	22	71	111	89	83	120	96	46	72	87	60	155	67	59	68	146	17	92	84	121	45	217
CYGB	1.2675	1.98689	14.9846	0.000108392	0.0414519	29	31	105	80	22	16	53	12	8	7	15	10	21	36	39	19	102	142	89	46	4	118	19	27	37	43	14	63	136	16	64	26	77	54	6	16	66	25	51	33	23	46	42	98
ITGB3	1.03325	3.30613	14.8874	0.000114122	0.0416037	221	258	97	303	119	60	148	98	110	40	76	76	58	47	115	88	473	190	315	59	20	298	85	75	165	258	105	97	245	137	174	238	92	206	17	63	164	115	107	162	114	128	235	132
MMP2	1.07313	5.32246	14.8857	0.000114229	0.0416037	1178	1606	1341	1198	317	111	752	184	186	126	233	202	379	545	513	370	3184	2192	831	394	72	971	624	694	788	947	212	513	3895	436	976	597	767	446	176	147	668	295	574	225	272	1205	672	830
CLDN6	-1.09987	1.4547	14.7817	0.000120702	0.0429392	360	89	64	17	8	40	97	123	35	61	57	14	22	21	79	39	9	160	29	18	248	56	185	115	59	19	63	13	88	39	50	47	61	133	112	113	42	87	49	30	27	81	28	60
TBX3	0.848894	2.57893	14.6894	0.000126755	0.0435933	66	167	164	144	155	57	79	37	66	22	74	73	104	96	78	62	536	170	109	47	18	83	39	50	57	97	74	99	273	120	164	159	102	98	24	18	93	60	118	96	107	54	233	109
DOCK2	0.943737	0.45969	14.6675	0.000128241	0.0435933	45	28	30	40	8	11	14	11	13	5	11	44	32	36	2	40	30	25	8	29	10	32	13	13	77	19	20	47	62	28	21	27	9	14	2	7	32	20	22	6	27	47	24	13
HPGD	-1.0193	2.59946	14.5804	0.000134303	0.0440121	465	196	404	42	43	149	209	167	126	132	104	452	17	120	141	60	99	44	50	190	153	229	104	103	48	126	56	283	271	55	68	86	166	1067	65	150	43	631	56	332	207	283	140	140
IL7R	0.837116	2.39653	14.5591	0.000135832	0.0440121	41	222	131	107	90	114	84	197	50	36	83	40	159	49	198	256	131	85	232	84	8	110	11	52	200	196	151	37	217	179	89	144	65	113	52	82	121	66	92	111	163	101	198	38
SNAI2	0.689705	2.53035	14.5152	0.000139031	0.0440121	54	177	144	227	86	90	81	101	85	106	102	80	144	117	229	105	262	181	239	122	3	155	76	51	80	109	75	164	204	182	110	236	103	168	30	60	98	54	177	212	113	97	191	118
C3orf80	0.998963	1.4413	14.4541	0.000143615	0.0440121	32	65	106	128	72	6	40	15	14	38	10	41	23	62	28	18	180	29	71	26	3	76	13	21	26	94	17	105	117	33	43	72	107	52	2	27	62	25	113	45	38	31	67	77
SLC33A1	-0.29366	5.82946	14.3758	0.000149715	0.0440121	1725	1996	1277	1591	1601	1247	1638	1162	1326	1420	1635	1907	1558	1806	1382	1240	2184	1250	2312	1038	920	1263	1403	1751	1593	2066	1491	1422	1511	1312	1411	1461	1483	1410	1644	1500	1184	1586	1396	1758	1429	1691	1566	1619
MPP1	-0.53363	4.76031	14.3129	0.000154802	0.0440121	736	898	833	1295	943	509	504	672	499	539	552	1462	794	870	894	442	977	900	863	386	198	613	485	612	858	1855	435	1892	1077	549	941	807	676	981	526	684	969	843	718	1065	659	1082	833	968
ITGB7	1.054	0.0758377	14.2818	0.00015738	0.0440121	1	26	30	9	3	15	7	16	1	3	26	4	7	29	43	38	18	22	4	10	1	3	22	17	38	19	5	9	38	11	19	16	19	29	22	2	22	25	9	16	8	30	18	14
ITGB2	1.3678	1.61476	14.2747	0.000157972	0.0440121	16	43	31	16	4	10	15	39	23	12	12	11	38	68	45	55	12	21	48	14	3	12	0	31	118	44	58	21	53	17	30	10	40	19	24	11	26	12	32	21	18	31	31	11
ALDOC	-0.712275	4.46471	14.2499	0.000160066	0.0440121	1107	1052	964	1218	705	293	791	403	330	251	321	474	441	1278	983	186	1033	553	703	291	306	471	185	1759	1517	959	195	909	363	197	476	322	833	1165	592	452	561	619	315	440	928	681	593	693
ARG2	-0.582472	5.14761	14.2373	0.00016114	0.0440121	1267	990	1166	1922	2318	563	640	762	512	627	719	2361	700	1701	1272	364	2025	1093	1044	490	503	775	571	503	1004	2655	545	1175	1280	514	730	766	1023	1032	559	770	861	1078	644	1866	1109	1269	1155	1551
SLC16A6	0.9524	0.863689	14.2204	0.000162596	0.0440121	17	84	26	93	45	17	14	41	5	4	9	19	38	37	28	6	169	62	45	37	4	30	10	1	65	50	5	39	129	47	63	38	16	56	5	14	49	24	47	9	18	21	38	22
CLEC5A	1.03677	1.07702	14.2043	0.000163999	0.0440121	46	51	21	29	17	41	38	69	23	7	29	24	107	8	121	106	54	60	49	51	15	4	19	83	253	6	23	30	77	55	64	6	28	23	13	36	65	54	23	25	10	22	20	37
PLPP3	0.382227	4.7716	14.1409	0.000169619	0.0441619	475	595	660	699	602	682	729	558	571	418	845	740	731	626	859	522	1031	489	1071	407	286	660	458	1031	571	336	698	336	805	623	581	875	366	541	575	585	405	576	666	824	608	622	867	486
KIAA1549L	0.480577	3.13438	14.1127	0.000172176	0.0441619	187	170	226	164	122	129	214	152	162	145	191	120	152	121	227	125	183	254	311	117	95	203	118	142	205	222	145	205	340	196	215	231	215	170	146	164	215	167	223	166	164	169	293	248
ZEB2	0.737936	2.79606	14.1014	0.000173218	0.0441619	82	223	252	349	185	55	115	74	63	65	85	121	80	128	160	140	549	144	243	78	13	257	58	131	68	198	82	135	231	138	187	175	62	158	27	70	97	70	189	201	184	156	186	216
RFPL2	-1.26646	-0.920238	14.0646	0.00017664	0.044296	5	4	7	53	5	14	39	13	2	3	10	35	14	6	15	3	25	27	27	9	0	3	0	1	4	44	6	25	29	7	20	10	14	65	0	16	40	22	1	7	10	23	9	16
BRI3BP	-0.305145	4.56864	14.0227	0.000180612	0.0445617	626	704	640	655	651	453	551	654	323	543	587	779	443	834	847	445	640	360	812	514	465	515	523	702	752	904	475	680	772	370	478	566	640	566	690	653	583	708	599	608	465	917	833	685
FCGR2A	0.783038	2.96693	13.9872	0.000184055	0.0446904	81	388	338	288	98	90	115	236	78	33	69	59	219	248	213	187	259	79	187	94	60	138	68	91	611	269	129	228	663	85	134	90	201	179	54	70	289	166	245	155	119	222	164	225
PDGFRB	1.14405	5.13923	13.8927	0.000193553	0.0455934	333	597	625	902	486	167	288	216	222	141	275	318	385	343	482	358	1387	629	693	352	29	619	167	236	402	563	352	583	531	331	674	390	435	450	48	128	334	180	724	564	372	365	591	355
CYTIP	0.736564	1.24402	13.8909	0.000193735	0.0455934	23	75	59	61	29	70	78	44	11	80	33	48	39	62	43	82	69	78	121	22	45	47	30	90	172	47	64	57	51	55	73	60	41	35	25	59	37	77	2	33	76	33	49	42
ZNF616	-0.370532	3.53635	13.8407	0.000198976	0.0461173	361	331	258	439	394	236	258	319	341	271	319	351	263	248	353	208	411	264	412	180	129	309	191	279	201	527	153	478	426	273	232	405	365	376	240	368	306	227	341	486	276	331	381	526
NCKAP1L	1.01373	0.650382	13.7883	0.000204604	0.0467138	11	40	42	36	26	31	9	21	15	22	1	42	29	0	21	20	35	58	22	11	2	20	9	20	56	40	2	22	41	26	60	22	24	20	5	16	43	11	29	22	44	50	40	31
BIRC5	-1.58003	0.1926	13.7433	0.000209566	0.0471432	44	1	207	23	26	2	75	37	6	24	20	2	28	58	150	11	0	235	62	14	14	17	57	50	29	22	5	103	123	47	17	16	44	24	33	1	85	52	10	13	0	106	6	67
CYP2J2	-0.659772	2.486	13.7031	0.000214105	0.0474661	314	270	74	187	142	91	125	173	134	150	155	95	73	137	236	69	74	152	250	67	339	96	133	145	370	117	103	100	172	122	126	59	132	317	220	168	175	354	85	149	149	283	136	171
DPYSL3	0.718907	4.85508	13.6708	0.00021782	0.0475291	197	493	612	842	671	193	712	593	249	141	350	522	479	291	980	388	1229	716	726	308	110	589	271	325	603	357	229	591	786	349	810	352	385	420	164	731	1011	370	596	1120	466	687	970	994
SLC38A11	-0.739501	-0.179757	13.6469	0.000220603	0.0475291	19	16	64	46	30	4	18	35	5	26	9	38	25	33	32	9	33	30	1	7	11	11	17	13	25	13	28	53	26	14	14	15	18	52	8	15	25	61	14	29	16	63	39	7
CALML4	-0.507647	3.77483	13.5793	0.000228689	0.0480802	627	610	479	493	471	236	723	391	284	280	256	760	381	545	507	199	372	325	494	246	226	232	250	914	306	383	104	482	589	146	303	261	360	708	319	501	399	1025	291	338	410	534	487	370
NHLH2	1.41788	-1.27086	13.5731	0.000229447	0.0480802	2	0	14	20	22	0	0	1	1	8	3	9	0	0	0	1	18	11	4	0	0	0	0	8	1	3	0	12	3	0	2	0	2	22	0	7	7	4	9	12	2	7	1	13
LAPTM5	0.752112	4.2288	13.3885	0.000253169	0.0519173	254	659	553	465	317	197	230	503	183	168	210	251	362	354	691	641	567	576	370	220	70	283	292	278	1179	466	321	551	1105	372	514	441	377	493	190	111	372	265	535	217	318	631	389	305
WDFY4	1.38408	-0.936456	13.3783	0.000254546	0.0519173	4	21	1	7	0	2	16	1	3	5	1	9	6	1	3	1	3	18	3	0	0	2	0	1	15	6	2	13	18	15	4	10	3	20	0	2	8	1	0	0	0	5	24	8
FBXO32	0.43575	4.92571	13.3514	0.000258233	0.0519762	1070	726	822	806	593	782	822	693	609	680	824	605	761	695	834	472	1063	1125	827	472	591	620	289	700	1599	593	830	514	652	749	987	960	840	627	530	588	562	672	634	435	796	501	476	790
MMP3	1.31967	5.20162	13.2847	0.000267577	0.0531574	708	3236	408	1969	266	146	327	347	64	53	345	395	1004	57	42	495	4457	980	1075	680	37	559	280	323	1486	1092	131	150	1398	569	1602	3016	219	679	168	152	248	342	641	59	818	250	1108	327
STBD1	-0.386695	4.47334	13.2482	0.000272845	0.0535091	765	744	386	705	810	369	562	503	242	602	379	625	331	643	506	248	823	661	658	319	597	481	435	448	582	591	459	454	582	368	467	524	487	873	435	431	538	794	410	673	423	586	541	712
HS6ST2	-0.608163	2.81912	13.1856	0.000282102	0.0546243	187	86	92	287	399	185	186	93	176	83	205	263	135	413	329	85	197	107	374	122	135	106	180	111	247	377	269	261	281	262	96	198	232	92	105	121	244	89	56	138	210	150	362	186
TBX2	1.48667	0.928834	13.1535	0.000286983	0.0548747	4	8	12	26	20	4	9	6	6	5	3	28	18	5	24	14	35	20	40	7	0	20	3	4	3	9	14	16	16	20	12	18	14	12	0	0	7	2	27	31	10	14	17	10
CHL1	-1.29615	2.7787	13.0386	0.000305128	0.057624	61	110	136	363	193	14	102	49	156	157	68	233	34	143	197	26	75	237	166	77	30	86	86	33	46	365	36	348	392	58	153	51	179	171	4	103	209	81	21	246	136	173	318	218
PRKCB	1.14243	-0.771502	12.9976	0.000311892	0.058183	3	5	11	4	4	4	9	17	0	5	4	0	5	21	27	10	13	33	8	0	2	15	0	15	37	9	10	15	20	28	16	15	0	0	0	6	15	21	14	1	4	8	0	13
CSF2RB	0.984427	0.730703	12.8984	0.000328855	0.0606083	1	32	57	45	18	36	23	34	8	20	10	50	61	21	79	53	60	28	80	3	0	14	15	10	45	30	24	73	21	37	25	36	30	28	0	6	31	11	44	21	7	16	42	5
PTGER2	1.02242	-0.914385	12.7949	0.000347562	0.0632936	1	21	2	26	15	0	7	4	4	6	1	11	14	4	4	2	28	12	31	2	2	8	8	15	2	6	1	6	12	10	12	9	3	5	5	8	3	4	26	17	7	2	5	9
CPXM2	1.36935	0.0870105	12.7516	0.000355697	0.0640129	7	19	11	10	19	1	22	9	0	3	1	0	0	4	29	5	58	8	7	2	12	6	6	0	20	2	4	1	10	7	4	9	7	2	18	7	4	2	6	15	6	2	16	8
PLA2G7	0.857958	2.27647	12.714	0.000362924	0.0645541	52	62	157	58	69	27	49	73	71	74	41	43	50	46	206	161	78	139	97	56	14	120	48	62	100	79	62	69	192	75	77	175	82	134	35	87	125	63	138	88	131	185	118	93
EMILIN2	0.877275	1.69966	12.6471	0.000376154	0.0652367	28	44	59	40	47	41	19	28	28	62	44	21	43	42	43	41	149	91	111	17	16	82	10	52	32	50	77	41	58	32	84	73	61	71	42	40	26	23	46	85	21	23	79	47
DKK1	-1.36843	0.692523	12.6458	0.000376418	0.0652367	154	41	58	14	6	38	48	49	22	77	10	20	8	19	1	67	0	19	7	88	73	33	111	12	6	7	33	83	95	25	31	42	18	375	57	102	14	121	58	3	50	12	54	81
MYO1F	1.03747	0.337553	12.5593	0.000394249	0.0652367	8	16	21	11	4	23	28	15	1	21	15	22	14	1	35	17	10	14	51	11	11	19	6	34	42	12	13	23	21	23	16	22	11	14	9	1	14	6	12	7	16	8	25	2
FCMR	1.16062	3.83129	12.554	0.000395369	0.0652367	364	1101	253	973	340	81	219	126	72	116	106	145	370	100	81	91	2891	223	577	48	40	583	70	84	313	459	221	217	512	323	431	615	122	252	69	81	182	133	263	123	75	188	287	531
SDHC	-0.256747	6.10784	12.5426	0.000397777	0.0652367	3262	1690	2375	2165	1770	1683	2377	1618	1214	1535	2565	2164	1946	2229	2438	1397	1975	1407	1744	958	1398	1468	1493	2261	2346	1799	1368	1854	2329	1563	2211	1448	1613	1903	2080	1504	1665	2306	1588	1871	1165	2644	2229	1979
TSHR	1.17456	-0.299148	12.5355	0.000399302	0.0652367	16	27	31	24	20	5	2	30	26	0	2	30	10	4	5	4	40	11	19	14	1	3	15	3	38	3	0	36	19	14	22	11	29	14	3	15	19	5	36	30	2	6	10	70
ZMYND12	-0.691794	1.09658	12.5341	0.000399599	0.0652367	38	53	80	105	34	34	62	23	37	72	30	75	31	117	71	43	95	58	55	30	10	62	54	46	79	75	14	119	77	27	77	63	81	108	47	85	122	45	40	70	51	104	93	149
CD163	0.902061	1.39694	12.5169	0.000403296	0.0652367	26	73	30	26	11	32	22	52	61	19	29	14	43	4	118	72	60	89	61	35	26	112	27	85	110	58	41	51	135	48	67	26	59	34	30	7	35	45	103	36	27	119	30	56
DKK3	0.811979	3.60787	12.4941	0.000408246	0.0652367	96	177	233	256	131	136	235	128	74	103	121	369	79	147	254	152	168	473	252	156	21	236	111	125	160	199	100	347	439	146	199	110	289	269	28	134	351	198	287	295	325	406	189	321
HCK	0.848209	1.24231	12.4521	0.000417517	0.0652367	35	100	57	84	26	42	10	92	12	7	32	19	34	40	47	75	47	42	76	62	1	38	23	17	137	105	34	73	52	44	94	99	22	48	13	28	36	22	55	57	18	42	38	36
RCSD1	0.913644	-0.333346	12.4427	0.000419622	0.0652367	3	31	15	27	13	4	1	2	4	1	3	17	5	0	19	27	33	12	22	5	2	20	6	1	10	10	12	19	37	7	27	24	19	31	0	4	25	1	19	27	18	16	14	5
MND1	-0.814326	-0.861306	12.4343	0.00042153	0.0652367	28	17	36	20	13	11	25	8	12	15	25	7	7	18	24	6	15	28	20	11	16	13	13	21	20	23	16	8	17	2	8	8	10	22	13	8	16	26	8	24	38	23	16	23
RBP4	-1.11656	6.52816	12.4151	0.000425871	0.0652367	1601	911	1540	1704	3710	682	1089	1355	899	961	1181	5130	663	4005	2741	1010	3098	1552	4274	926	1063	1254	1186	307	467	1800	548	3805	4612	800	1191	568	2082	4349	164	3392	3050	2809	547	3136	674	3976	1887	2044
CHI3L1	1.0525	4.14004	12.411	0.000426816	0.0652367	746	376	533	481	164	233	293	132	23	11	103	77	396	258	241	116	267	166	265	55	325	204	372	361	828	173	161	22	578	451	505	275	91	155	323	94	126	289	189	23	59	328	139	336
DGKH	0.320129	3.98535	12.3874	0.000432229	0.0652367	380	340	320	479	366	238	323	557	265	347	466	286	245	350	361	243	652	384	517	241	326	280	249	334	265	180	305	340	467	276	453	405	402	566	364	299	248	422	378	432	301	338	398	522
ITPRIP	0.500216	3.21106	12.3626	0.000438011	0.0652367	222	182	119	219	220	199	128	165	123	88	194	167	125	86	95	193	347	238	220	118	115	240	104	127	138	140	244	218	270	210	229	144	113	252	146	176	138	117	270	267	125	171	198	134
GRB14	-0.528027	3.71194	12.3573	0.000439262	0.0652367	216	309	448	315	418	287	573	636	260	318	398	302	398	663	854	237	208	472	387	359	472	289	439	658	275	172	212	400	608	184	176	284	426	268	624	330	322	619	284	248	398	587	373	272
LMAN1	-0.318026	7.66	12.2873	0.000456048	0.0670785	5267	4860	4898	7461	6449	3830	5522	5177	4461	4978	5247	7225	4362	8150	6137	3528	8215	5851	7999	3514	3464	4587	4261	5911	5797	6696	5327	5853	5358	4606	4335	5610	5577	5819	5259	5418	4581	5798	5464	7155	7102	7112	7602	6108
MDFIC	0.436158	3.47172	12.2063	0.000476287	0.068504	196	166	261	318	254	146	255	274	77	220	137	257	139	230	380	200	322	257	216	141	160	187	189	322	228	200	110	235	245	146	178	204	170	268	117	359	201	257	246	470	192	283	217	480
OPRD1	-1.05714	2.87505	12.1938	0.000479479	0.068504	175	212	235	574	391	50	86	145	201	126	132	341	44	285	219	33	201	232	322	70	23	174	97	19	111	532	78	700	250	90	132	299	331	284	24	159	304	168	59	207	90	162	335	250
MYOM1	0.619441	3.68066	12.1766	0.000483922	0.068504	138	259	249	829	543	369	311	328	64	167	173	540	255	112	152	193	777	97	242	212	126	162	156	233	227	241	163	155	139	122	197	119	184	235	115	190	116	294	297	271	191	150	107	665
C11orf96	0.890654	2.40357	12.169	0.000485909	0.068504	31	69	97	212	65	44	82	28	27	24	64	52	70	30	78	91	253	108	87	54	23	122	37	53	60	67	60	67	99	63	76	58	37	71	24	22	41	22	137	76	75	51	109	57
CAPN13	-0.704941	4.31143	12.147	0.000491663	0.068504	515	675	426	854	466	231	560	371	373	448	209	396	267	355	225	224	501	478	487	210	287	314	130	231	588	878	294	1314	486	306	683	373	879	803	112	603	709	636	594	1489	450	637	840	1180
WIPF1	0.43739	3.30266	12.1434	0.000492609	0.068504	158	214	167	199	185	219	235	196	176	118	191	255	203	244	255	322	303	268	220	192	167	220	165	91	184	168	220	203	369	181	263	206	127	215	103	127	163	183	266	178	228	155	252	159
ZPLD1	0.841645	2.64297	12.0564	0.000516135	0.0705921	252	185	122	31	91	325	82	239	53	69	51	247	296	72	86	181	53	142	105	156	21	73	72	61	125	164	69	177	73	216	174	95	87	156	53	121	52	165	300	209	145	85	222	140
GBP5	1.05641	0.627176	12.038	0.000521282	0.0705921	15	131	8	14	80	116	13	5	0	5	107	37	27	15	69	11	66	6	113	3	23	8	0	2	55	46	31	7	25	18	20	42	1	19	31	14	35	38	16	38	20	11	21	23
MSR1	0.850964	2.33925	12.0373	0.000521469	0.0705921	48	21	139	78	18	66	78	118	65	67	59	64	166	63	314	205	76	184	70	32	25	103	75	138	154	59	75	114	346	73	177	107	83	116	98	111	99	112	167	106	168	348	46	65
PCLAF	-0.948007	1.32764	12.0068	0.000530064	0.0709136	60	39	267	70	35	21	80	76	28	34	52	30	52	110	291	24	34	181	98	49	49	92	64	92	27	68	38	198	219	66	90	31	120	64	48	35	218	106	65	84	113	226	105	159
CD163L1	0.815384	0.0925557	11.9961	0.000533115	0.0709136	14	12	14	48	15	10	24	8	20	13	9	6	20	21	23	24	51	29	39	22	11	28	23	12	22	26	11	34	70	16	33	18	22	26	25	21	26	17	18	20	38	37	18	37
CTSV	-0.95371	2.92671	11.9291	0.000552643	0.0723891	130	172	86	711	310	130	185	234	267	180	189	641	259	83	338	77	356	189	697	171	189	272	251	67	90	232	55	285	270	184	286	597	262	477	23	308	163	159	168	247	227	295	616	115
TFEC	0.872243	-0.253954	11.9141	0.000557121	0.0723891	5	9	39	55	10	22	10	17	11	12	9	13	11	0	35	17	32	22	18	20	16	16	3	21	32	9	14	16	27	25	24	14	16	12	14	15	5	0	12	24	28	10	5	8
TWIST2	1.17089	-0.857369	11.9098	0.000558404	0.0723891	0	5	8	8	3	1	0	1	2	2	1	11	21	4	5	12	42	14	20	5	1	12	0	1	4	3	1	11	18	14	12	8	5	1	1	1	11	0	3	20	29	9	17	20
BPNT1	-0.316258	4.81167	11.885	0.000565885	0.0727423	1079	732	1113	1021	863	594	864	933	544	539	630	748	682	1272	1241	537	1086	549	886	492	824	660	638	852	1126	781	618	648	925	453	506	596	739	802	1087	617	826	1175	543	691	1105	1006	1066	872
DACT1	0.65683	2.49375	11.8526	0.000575807	0.0731766	101	115	162	108	38	50	144	103	39	95	71	61	151	85	266	96	351	175	125	122	20	103	58	83	88	58	67	125	246	204	125	89	122	94	41	83	96	64	156	77	111	130	121	159
MPEG1	0.953756	1.42379	11.8281	0.000583431	0.0731766	15	63	46	71	52	35	54	43	2	14	28	18	34	44	84	51	42	62	26	41	4	21	10	59	145	44	32	119	128	39	67	34	104	70	27	41	100	50	44	37	13	128	40	70
CD226	0.882053	-0.0468142	11.8275	0.000583614	0.0731766	1	50	18	37	3	12	0	1	23	22	19	18	6	14	49	17	34	10	34	4	4	4	3	13	78	13	19	9	15	4	26	22	30	38	0	8	29	0	17	40	10	29	10	14
APOBR	1.61771	-0.669044	11.7939	0.000594253	0.0737101	2	3	1	2	0	5	0	2	7	2	5	1	5	3	11	14	1	7	6	0	0	3	0	1	1	4	0	0	5	6	1	0	1	5	6	4	2	2	4	3	0	8	10	2
CCR5	0.941935	-0.241436	11.7837	0.000597507	0.0737101	1	17	33	23	10	19	3	4	0	13	16	0	11	25	38	22	36	29	17	6	2	5	17	12	40	13	11	0	9	24	33	12	20	19	18	0	18	11	31	16	5	11	27	6
ACADSB	-0.337601	4.79685	11.7554	0.00060668	0.0742431	1019	695	796	1093	828	530	772	943	525	573	512	1152	624	918	836	664	1092	817	808	444	575	543	506	761	981	1259	460	1128	1052	543	669	747	766	801	914	566	763	1179	658	832	454	899	668	994
ACLY	-0.464405	8.31903	11.7305	0.000614826	0.0746428	9281	10271	9489	10769	9236	4280	5765	5665	5292	5320	5288	15422	6148	8885	9630	3579	7490	7694	12442	4744	2963	6757	4411	5075	11306	26076	4930	14693	9890	4405	9175	6888	9624	7855	4307	7351	11112	8517	6638	10608	7544	11393	13705	10715
SPI1	1.31739	0.0325012	11.7063	0.000622892	0.0750266	16	17	8	9	18	2	1	4	0	7	2	0	5	9	6	13	33	22	2	3	8	16	0	1	8	11	18	9	20	6	11	8	17	16	2	1	30	14	3	10	2	9	8	8
KRT15	-0.728887	1.62589	11.6892	0.000628631	0.0750377	148	208	42	44	59	83	185	89	27	42	192	25	64	56	65	32	60	46	154	62	115	57	66	131	28	25	95	27	62	61	73	68	78	244	87	96	56	169	103	61	94	86	64	40
CLTRN	-0.625838	4.97277	11.6769	0.000632795	0.0750377	828	740	1399	2634	1174	663	1193	1150	521	538	690	1292	980	1708	1683	720	910	668	1206	418	655	657	1130	1896	1322	787	386	960	877	504	511	629	992	941	1534	704	1028	1900	661	637	1412	1151	1130	1008
GADD45B	0.427552	4.75308	11.6128	0.000654985	0.0770715	882	999	418	1216	983	961	443	604	558	668	643	623	703	325	530	797	1727	837	818	326	328	561	501	250	468	410	672	418	563	642	620	688	401	771	245	440	326	718	571	535	493	400	528	376
FXYD2	-0.864128	7.97507	11.5606	0.000673655	0.0786633	10101	7673	17662	23267	14502	5344	6973	9403	3164	5454	4235	13015	6904	16110	13897	4548	13559	11479	8407	2029	3639	4684	4865	9691	10003	13348	2594	15910	10482	2683	6212	3254	10827	10732	3235	5720	14349	13653	4475	6924	8263	12771	7489	12308
TNFRSF11B	-0.817606	5.12243	11.5343	0.000683247	0.0791003	1182	1653	561	575	764	1416	525	1170	2076	2322	4063	1180	706	417	768	1318	694	513	1396	1529	709	508	1010	431	716	620	685	386	790	1342	1236	928	858	4211	669	2511	644	1588	947	1489	1029	1136	1033	983
TCAF1	-0.249778	5.8952	11.5221	0.000687739	0.0791003	1488	1434	1629	2203	1542	1420	1581	1187	998	1332	1328	2053	1047	1537	1926	1091	1880	1362	1847	982	1426	1084	965	1546	1568	2403	1017	1598	2064	888	1226	1211	1409	1532	1533	1289	2178	1834	1527	1853	1093	1909	1827	1893
GSTM2	-0.576684	4.0033	11.4025	0.00073347	0.0837306	644	506	773	543	391	342	463	453	190	210	309	349	754	713	922	315	307	389	161	461	632	362	669	638	873	494	123	824	580	93	219	222	710	267	713	443	516	706	350	287	214	767	402	501
CSF3	1.64342	1.69884	11.3712	0.000745909	0.0845198	51	242	3	131	97	10	27	0	1	2	22	4	69	11	17	7	530	5	181	0	5	62	0	10	363	65	61	2	4	26	27	215	10	92	11	3	0	3	1	20	16	3	25	3
IL11	0.841906	5.02831	11.3019	0.000774298	0.0870914	422	589	417	1151	855	416	183	250	525	256	433	756	890	209	170	625	3425	419	1189	292	67	631	99	217	444	756	648	257	443	580	322	547	260	595	135	330	90	187	1144	1022	612	135	706	247
CD180	1.24326	-0.774938	11.211	0.000813154	0.0901701	22	16	24	1	4	8	14	0	0	5	0	0	4	0	64	11	17	4	7	0	1	8	5	2	19	5	1	3	29	7	6	14	7	5	3	12	4	14	0	11	3	34	23	23
PAH	-0.748007	2.28381	11.2103	0.000813458	0.0901701	243	116	243	65	161	28	304	124	87	105	82	368	113	360	216	46	55	130	80	51	45	47	247	293	145	153	38	124	190	112	40	16	145	162	114	154	117	244	38	17	73	311	155	180
CD248	1.25949	1.84528	11.1665	0.000832879	0.0916587	17	22	83	32	25	11	62	8	5	4	32	25	12	50	20	39	28	137	38	33	1	73	29	43	5	51	20	78	206	29	37	10	79	47	3	17	76	16	42	32	29	34	51	34
ALDH18A1	-0.230274	5.87671	11.1419	0.000844009	0.0916634	1662	1955	1458	1880	1796	1228	1510	1276	1081	1102	1441	2176	1538	1857	1679	1162	1893	1089	1996	870	1032	921	1294	1515	2839	2607	1414	1839	1512	1064	1274	1530	1362	1582	1329	1273	1574	1658	1301	1623	1556	1641	1845	1944
CDK1	-1.11567	1.13642	11.1399	0.000844907	0.0916634	50	41	294	74	14	14	86	55	44	13	40	9	25	57	199	12	28	288	83	28	44	57	121	70	45	69	11	178	231	110	41	13	120	42	47	26	250	84	60	21	68	219	67	106
TAGLN3	-1.0052	4.08326	11.1021	0.000862313	0.0922541	1108	477	666	927	1326	123	392	248	318	250	217	1020	441	742	541	116	838	348	793	198	102	551	144	261	625	1325	109	1019	734	441	423	473	537	994	36	564	1234	466	141	887	268	586	1007	784
KCNAB2	0.873427	1.92503	11.0893	0.000868291	0.0922541	30	51	41	76	74	20	34	31	19	29	26	131	27	49	67	28	88	84	41	44	26	74	22	42	54	56	14	89	76	31	69	28	124	54	9	37	86	55	35	54	31	40	66	66
COG6	-0.394918	5.48356	11.0889	0.000868444	0.0922541	1182	1076	1290	1819	1509	1006	1259	1256	1137	958	917	2271	734	1377	1854	694	1775	1255	1293	673	795	1028	738	1160	1604	2143	755	1963	1480	787	1100	1179	1218	1549	1020	1330	1417	1283	879	1671	1823	1746	1962	1895
PCDHB4	0.536929	3.47351	11.0267	0.00089809	0.0938534	62	192	180	234	274	188	152	267	118	112	92	304	289	327	155	117	455	239	231	140	136	173	187	98	220	392	143	613	273	164	226	212	437	158	64	362	296	208	381	418	308	333	445	477
PRRX1	0.706759	3.92418	11.0119	0.000905293	0.0938534	124	471	603	591	313	159	307	195	198	159	231	128	325	240	426	303	996	429	464	214	9	719	175	282	297	360	247	373	582	393	478	346	372	371	79	157	239	132	610	484	433	335	453	322
RBFOX1	0.988111	-0.745437	11.0114	0.000905522	0.0938534	8	15	2	14	18	2	22	30	3	4	2	6	2	10	6	11	20	41	20	1	1	13	5	10	8	1	9	4	12	14	26	13	10	12	1	20	21	9	7	15	2	2	2	55
PJA1	-0.282807	5.56352	11.0063	0.000908041	0.0938534	1665	1699	1170	1285	1481	1147	1241	1451	1189	1204	1720	1568	1029	1149	1586	1052	1610	1105	1824	756	1168	1008	1073	1167	1521	1565	1159	1242	1340	899	1018	1115	1189	1627	1006	1567	1067	1702	1247	1583	1429	1695	1650	1584
STAB1	0.903082	2.04191	10.921	0.000950828	0.0972312	37	44	67	101	106	33	58	44	42	40	37	73	50	44	63	67	124	97	106	63	31	77	33	30	41	69	43	61	81	31	68	51	43	61	29	49	57	39	83	56	53	58	78	61
IL24	1.27463	5.80035	10.8941	0.000964701	0.0972312	1357	5193	955	3981	1199	188	595	432	180	365	326	487	1585	190	116	309	12585	941	2236	135	64	2412	214	236	1123	1829	776	743	2094	1186	1664	2495	332	952	194	118	527	385	810	314	188	552	1087	2048
HAVCR2	0.8916	0.211099	10.8846	0.000969682	0.0972312	11	14	25	20	21	14	0	31	11	11	8	2	4	15	33	28	24	27	23	0	0	0	2	18	28	32	24	37	95	23	51	53	31	15	12	6	23	17	22	17	41	26	8	21
CACNG5	1.24131	1.85218	10.879	0.000972593	0.0972312	17	44	33	62	54	15	29	33	1	20	23	128	16	36	85	40	55	29	43	0	0	40	4	21	68	64	1	59	13	35	97	25	94	60	0	103	66	70	79	75	16	34	19	294
ERICH5	-0.456211	5.0191	10.876	0.000974171	0.0972312	1289	1197	1254	1420	939	708	1066	892	471	758	916	1133	916	1473	1293	730	937	779	1008	476	1060	749	895	1162	1263	1021	767	1022	753	552	713	746	657	1230	1099	830	954	1798	614	887	602	1477	1117	1243
COCH	1.19966	4.54683	10.8671	0.000978859	0.0972312	147	216	124	233	348	341	222	2821	434	633	955	681	707	183	209	1061	37	532	105	129	345	70	1439	540	250	290	276	273	342	664	231	111	87	148	687	585	145	385	1529	285	254	566	327	200
RUNX3	0.713466	1.35695	10.8316	0.000997803	0.0984735	50	61	81	82	70	30	40	57	25	27	42	35	65	43	98	74	87	78	111	81	2	49	11	18	59	85	29	56	98	23	108	56	62	71	22	30	39	17	71	86	41	32	92	34
FRMPD3	1.19089	1.041	10.7645	0.00103463	0.101453	13	27	38	81	90	9	14	30	12	4	4	8	40	33	24	1	75	13	39	16	0	37	2	17	31	54	3	19	28	7	13	60	44	8	0	4	33	8	32	15	24	13	38	63
PFKFB2	-0.595814	6.99221	10.7485	0.00104362	0.101683	3694	2978	2371	5583	4212	1561	2732	2844	2514	2796	2179	5846	2093	4726	3525	1640	6760	4904	5532	2446	1699	3125	2197	1981	2342	5682	1368	8262	4607	2153	3839	3493	3766	5203	1304	3520	5468	3988	1744	4596	1890	3926	3941	5818
TFF1	-1.37859	4.56049	10.7252	0.00105686	0.102322	2967	2234	869	89	239	1277	2057	1075	416	591	345	558	547	387	475	67	52	67	2071	629	467	258	363	388	628	61	40	51	348	92	681	340	2109	7907	237	2737	315	4652	314	825	539	209	1175	30
LRRC19	-0.889874	1.42644	10.6999	0.00107139	0.103076	196	117	143	40	125	103	155	49	20	20	36	24	26	146	81	32	19	55	38	171	82	55	99	190	194	17	124	58	153	11	27	48	93	123	85	87	62	362	69	23	66	52	14	118
PDIA6	-0.27565	7.60271	10.6192	0.00111922	0.105372	7867	7023	5091	4770	6308	3982	5007	4214	2984	4013	5372	6287	4674	6742	5777	3819	4983	4947	5757	3220	4053	3920	4864	6017	9575	7923	5390	3842	5192	3771	3817	4319	4519	4949	6253	4143	3841	6147	5202	6809	6428	7346	6004	6275
HHATL	-1.06429	2.03365	10.6177	0.00112013	0.105372	160	166	187	226	179	23	36	75	35	22	63	319	2	200	152	9	140	65	144	73	27	147	1	67	93	514	48	181	173	49	122	112	99	141	0	47	166	149	23	171	92	133	94	224
NYAP2	0.480114	2.97611	10.6171	0.00112048	0.105372	46	188	284	248	305	142	167	142	219	115	149	213	122	132	220	86	249	184	304	150	109	193	95	119	196	229	148	205	294	139	125	201	170	100	107	112	311	104	194	160	159	157	227	401
PEBP1	-0.414638	7.98591	10.6132	0.00112281	0.105372	9984	5700	5975	13585	10859	4193	5206	4599	3711	4526	6354	10019	4462	7891	5736	5601	7112	9485	9526	5468	7818	6621	7027	8567	10771	13278	4874	8793	5524	1974	4318	6177	6082	7022	2945	4617	5906	9278	7348	10206	5579	11416	8026	12886
HIBADH	-0.331022	4.67756	10.5819	0.00114202	0.106521	659	442	669	1075	725	360	707	669	519	377	522	572	454	905	940	451	698	911	821	501	838	452	543	629	874	612	346	523	903	274	473	546	537	508	602	366	727	602	395	738	681	815	842	897
SH2B3	0.372866	4.91373	10.5593	0.00115607	0.107038	551	744	798	1254	893	513	788	465	352	337	598	629	824	573	628	529	1816	827	1063	621	437	876	538	468	674	675	716	723	959	664	674	893	632	730	474	404	452	475	1067	965	682	587	1103	672
FNDC1	1.92058	-0.810332	10.5505	0.00116156	0.107038	4	1	5	1	4	0	1	6	1	0	0	0	0	1	32	0	6	1	0	0	2	0	19	29	1	4	1	13	25	0	1	7	0	0	0	0	6	0	2	0	3	1	6	8
MMP19	0.659297	2.63398	10.5057	0.00119006	0.109008	128	543	101	417	139	66	87	98	39	54	87	93	127	41	44	111	583	110	171	45	62	169	65	107	249	299	98	109	189	82	148	232	134	227	48	42	126	82	119	111	101	111	215	136
EMILIN1	1.70358	2.54716	10.4335	0.00123751	0.112679	8	5	19	19	16	12	3	4	17	2	15	15	22	3	30	21	11	32	54	20	1	28	10	9	8	7	6	7	8	10	13	10	5	11	1	2	9	3	19	19	12	14	28	17
TNFRSF1B	0.808335	1.01411	10.4196	0.00124685	0.112859	13	30	25	49	41	26	19	27	6	6	26	19	31	14	34	58	43	38	56	18	5	20	17	10	43	40	20	24	38	20	33	42	21	40	22	18	20	33	57	16	12	27	30	17
SOCS1	1.01508	1.89775	10.3896	0.00126726	0.113365	21	51	54	43	98	29	52	31	21	10	17	4	65	16	47	27	114	24	119	23	50	40	8	28	46	15	28	14	35	18	21	35	29	17	23	22	60	16	26	26	46	25	61	71
GFPT1	-0.254422	7.1907	10.3896	0.00126726	0.113365	3442	3087	2933	5183	4283	2678	3803	3473	2895	3138	3471	4958	2728	4660	4609	2678	6063	3645	5497	3296	4241	3233	3501	4327	3625	5038	2338	3027	3687	2145	2308	3287	3057	3259	3070	2843	3100	4409	3409	5324	3620	4761	3938	4070
PTPRR	-0.863166	1.41879	10.3517	0.00129354	0.114769	196	126	75	32	11	42	123	78	11	80	63	48	34	124	155	44	47	60	67	38	224	33	122	151	87	37	37	17	135	50	27	36	89	181	142	95	82	165	25	65	160	112	82	144
KBTBD7	-0.391818	3.88847	10.3428	0.00129983	0.114769	380	381	355	618	534	259	401	501	333	332	329	386	318	591	459	240	943	236	473	206	214	373	254	336	295	744	248	625	466	226	342	384	454	433	273	415	591	342	338	469	446	528	544	597
EBF3	0.818926	-0.521427	10.3348	0.00130547	0.114769	2	12	18	26	13	3	4	17	1	12	11	12	0	17	8	8	39	8	15	5	0	12	9	6	1	4	14	45	14	13	46	12	21	15	9	3	2	11	16	39	4	5	27	15
SYT9	-0.658658	0.698872	10.3021	0.00132878	0.116151	27	24	37	41	40	20	56	34	16	25	30	41	24	7	36	19	87	40	31	2	16	52	16	37	44	91	37	61	15	31	37	18	54	69	13	43	47	37	21	79	48	16	54	80
RGS1	0.746856	2.81376	10.2856	0.00134075	0.116531	97	158	189	215	102	105	99	202	85	72	149	99	191	161	207	433	280	163	112	97	24	123	54	112	299	138	101	207	450	150	310	98	133	100	70	75	90	213	160	96	588	348	142	226
PCCB	-0.368948	5.17971	10.2647	0.00135598	0.117189	1083	1200	880	1346	1229	736	1202	845	444	701	1174	915	870	1124	1003	680	804	1345	1387	886	1398	959	1050	1286	1902	1789	849	1355	842	403	762	1001	751	972	791	788	885	1381	1203	1166	773	1790	1222	1078
SASH3	0.99546	-0.42994	10.2528	0.0013648	0.117288	1	18	21	20	20	13	4	7	12	2	9	1	9	1	10	16	4	17	14	15	5	15	0	11	5	23	9	10	43	7	19	11	12	15	3	11	16	15	16	3	25	10	3	2
POSTN	1.2499	3.87387	10.2362	0.0013771	0.117684	197	615	866	347	135	4	108	104	187	86	19	17	21	116	296	99	136	451	330	83	44	289	42	438	271	913	87	933	703	65	191	172	100	346	2	87	302	44	61	74	460	960	180	431
KDELR3	-0.45575	3.8402	10.1442	0.00144755	0.123017	397	489	543	278	366	286	572	487	264	310	291	337	358	698	807	391	212	500	363	353	399	254	692	475	521	143	428	364	784	316	205	136	287	228	514	364	287	455	411	358	468	629	287	281
SCD5	-0.458433	6.73479	10.1108	0.00147399	0.124518	1652	962	2021	1853	1873	2381	2264	3206	3512	3596	4268	4771	2400	3415	6077	2897	1675	2785	1586	1365	2862	1638	2731	3328	1311	1238	1664	3003	2292	1721	2207	1332	1577	3419	3726	4692	1615	3216	3280	3394	2514	3414	2981	2568
TSPAN1	-0.667269	5.65894	10.1015	0.00148148	0.124518	1718	2676	1176	1740	1416	399	2232	1335	717	1015	948	4346	715	2190	2037	477	934	931	1314	831	1014	1067	734	989	1071	4072	551	1232	1713	490	804	690	1357	3318	892	1911	1419	4793	953	1552	1124	1222	1867	2075
SORCS2	1.19731	-0.715758	10.0798	0.00149907	0.125307	4	5	10	3	4	2	3	2	0	11	2	1	7	0	14	3	7	2	2	2	0	9	5	0	4	17	2	12	15	3	1	6	7	23	0	3	6	9	2	7	3	9	13	7
ASCL2	-1.64011	-0.47323	10.063	0.00151275	0.125764	5	6	6	18	13	2	3	6	7	2	0	35	5	10	12	4	17	1	6	1	0	5	3	1	2	10	1	18	5	1	3	2	3	7	2	4	14	8	1	6	2	14	7	8
MMP9	0.872862	4.17101	9.99945	0.00156587	0.129476	181	282	350	1030	369	148	103	311	148	54	122	92	238	236	274	306	704	588	773	133	22	567	93	344	794	450	411	64	75	176	358	732	204	323	65	44	120	141	223	319	168	308	425	146
HSD17B13	0.993763	0.14514	9.94362	0.00161408	0.132745	5	24	5	32	31	3	18	13	0	29	16	196	23	11	7	33	72	3	24	4	1	21	12	10	13	72	9	3	14	16	9	3	5	8	0	21	10	119	19	16	10	12	6	38
COL15A1	0.786091	4.7545	9.92395	0.00163142	0.133454	326	236	1026	444	414	186	366	183	230	196	483	450	268	576	1248	468	891	947	603	477	65	586	250	425	326	433	375	663	759	396	580	332	543	432	170	151	387	165	554	548	679	547	309	628
PPP1R16B	0.848588	0.665114	9.90573	0.00164765	0.134064	17	17	70	40	37	18	20	28	1	7	20	21	22	17	52	52	61	49	29	20	0	40	4	12	42	64	63	40	25	8	31	15	13	13	6	20	46	9	16	20	50	15	45	27
ZNF423	0.758872	0.411306	9.86079	0.00168839	0.136364	3	14	25	33	20	18	15	26	33	7	18	19	13	53	35	9	41	53	28	18	15	15	12	9	9	14	20	21	28	13	18	10	33	2	6	9	23	5	16	21	13	13	18	26
PHKB	-0.238872	5.36128	9.85496	0.00169374	0.136364	993	1133	1196	1052	788	731	1277	995	789	808	1204	1077	797	1266	1465	740	1040	938	1273	709	902	690	968	1231	1422	1253	768	1220	1280	743	848	679	892	993	1196	760	858	1312	867	867	921	1299	1090	1417
HADH	-0.651284	7.58215	9.83282	0.00171426	0.136629	5654	4834	5388	15217	10328	2409	3099	5637	2899	3517	2974	13358	3658	8269	7346	3540	10200	3874	5429	2475	2229	3362	3149	2403	4688	12461	2771	12544	5961	2214	4257	3895	5260	8535	2042	5308	7230	6985	3724	8313	2935	6310	6851	12143
MSC	0.568903	4.24143	9.83214	0.00171489	0.136629	1091	1062	304	423	415	413	373	430	223	388	380	455	540	188	261	490	670	583	771	287	192	392	495	258	1067	400	562	208	440	467	547	597	261	527	362	252	226	317	547	439	162	186	271	310
PPA2	-0.535798	6.09831	9.77636	0.00176769	0.140106	2384	1849	1405	4010	2136	2512	1364	2117	847	1982	2686	2110	1099	1937	2807	1528	1521	3520	4181	1859	2801	1693	2812	3694	2217	2206	1269	1526	1453	704	1523	1595	1335	1361	1243	1167	1266	2395	3435	2752	4157	3988	1689	1453
C5orf58	1.06584	-0.839777	9.66147	0.00188173	0.148073	8	18	15	8	15	4	0	6	3	1	2	5	12	6	10	5	15	18	14	1	0	15	0	8	6	10	14	5	29	1	7	8	30	38	0	3	6	13	29	15	36	5	13	25
SOCS3	0.552154	4.16528	9.64311	0.00190063	0.148073	308	361	276	472	404	292	375	325	286	193	367	274	403	182	513	320	774	246	676	197	307	336	143	348	277	169	311	160	280	337	322	504	240	284	213	219	252	245	401	478	342	188	366	365
ZNRF1	0.307418	4.15177	9.62989	0.00191436	0.148073	370	418	572	516	654	222	370	271	255	342	367	356	452	395	385	280	648	340	494	189	222	337	217	341	469	498	274	442	526	233	314	451	495	352	234	285	396	313	428	452	444	350	551	569
MANBA	-0.343498	4.28753	9.62774	0.0019166	0.148073	574	713	464	553	368	454	349	414	320	515	415	500	275	717	606	290	546	410	761	238	399	505	372	603	557	637	419	667	671	342	543	638	383	428	475	561	312	544	385	531	288	342	743	424
EDARADD	-0.690558	4.68845	9.62773	0.00191662	0.148073	726	535	550	2005	1254	202	283	505	416	343	265	1734	321	718	538	217	1632	383	1102	367	161	670	217	179	430	1579	347	1357	811	341	574	723	1027	1037	95	530	753	549	459	1093	453	571	946	1228
DNAJB9	-0.44312	6.65225	9.60971	0.00193552	0.148222	2460	1568	1824	4891	4507	2439	2075	2447	1978	2319	3053	4581	1947	2674	2477	2570	5561	3077	4531	1730	1914	2919	2361	3609	2984	3385	2404	2670	1431	1158	2258	3024	2130	2997	1063	2055	1717	3021	2739	4905	4500	3534	3818	3590
DRAXIN	1.13228	-1.37584	9.60742	0.00193792	0.148222	0	20	1	1	11	17	4	5	0	0	5	6	2	0	1	5	3	6	18	6	2	13	0	2	5	12	5	8	16	10	2	1	1	5	1	11	0	4	0	5	20	5	0	6
SLC15A3	0.556643	1.76483	9.57321	0.00197437	0.150259	75	88	41	61	100	36	49	56	43	49	71	60	47	58	83	56	96	71	100	56	53	50	41	45	65	35	51	56	76	34	60	76	41	68	49	53	61	52	34	69	49	74	66	52
SLC5A5	0.95605	-0.647689	9.54471	0.00200526	0.151854	6	16	13	23	38	3	15	2	1	3	5	5	4	15	15	10	24	10	58	0	6	3	2	1	53	30	2	1	21	0	11	6	9	31	4	3	10	19	9	9	0	11	4	7
C1QA	0.937064	0.425424	9.51706	0.00203571	0.1534	14	42	18	29	13	7	33	23	0	10	8	19	13	30	28	11	26	33	29	20	0	18	9	11	79	11	13	56	71	12	29	18	20	18	4	11	23	12	22	11	10	68	8	8
ARMC9	0.301255	4.23434	9.49515	0.00206016	0.154403	517	742	648	520	480	358	312	328	218	271	423	253	445	339	545	486	871	338	448	238	281	420	388	315	815	655	367	514	639	411	352	424	565	568	377	386	453	426	635	455	255	343	528	419
GLRA1	-1.02636	1.99766	9.48711	0.0020692	0.154403	55	45	91	264	197	13	73	84	71	66	16	78	32	51	45	33	198	228	267	67	10	106	27	40	116	263	40	279	114	51	170	121	195	192	3	95	223	69	68	172	61	68	107	290
IDO1	0.839559	2.01596	9.47713	0.00208049	0.154492	34	197	90	83	73	150	70	46	8	22	144	41	139	93	109	80	117	71	328	26	34	98	35	175	179	76	40	19	73	98	8	237	48	54	46	66	69	95	41	109	196	17	140	21
MAPK4	0.786961	2.59726	9.46475	0.00209458	0.154738	76	172	160	145	177	26	74	41	43	49	49	46	97	175	160	8	150	92	64	57	30	135	40	48	128	85	32	132	193	53	67	52	204	83	12	36	187	43	102	87	116	97	105	206
HSPA4L	-0.361218	4.79161	9.45444	0.00210639	0.154738	528	761	775	1081	715	405	635	920	346	592	807	975	561	932	600	419	1045	1127	962	419	360	599	560	611	906	1231	413	912	997	413	699	557	897	725	524	775	1133	787	492	931	674	989	1029	1261
CD300A	0.833522	0.861007	9.44769	0.00211415	0.154738	15	60	48	101	31	13	34	20	22	10	17	36	26	14	18	28	36	64	45	18	0	21	14	4	152	62	50	51	129	19	28	33	76	6	17	20	31	32	30	21	63	52	36	41
RAB3IP	-0.28769	6.54739	9.42007	0.00214624	0.156338	2362	2303	2065	3150	2774	2117	2360	2416	1983	2204	2824	2867	1639	3198	2681	2008	2637	3271	3512	2102	2519	2455	2792	2521	3183	3515	1534	3187	2997	1512	1966	2634	2795	3164	1716	2451	3091	3016	2501	4192	3184	3285	3143	3645
HERC4	-0.236374	5.28769	9.40019	0.00216963	0.157293	1223	1136	771	840	772	881	1274	1170	729	897	1243	948	952	1020	1124	683	1026	961	1301	616	1124	772	1086	1217	988	959	1006	766	1173	853	920	1208	933	1368	1113	1256	891	1339	810	1132	1153	1062	1123	1125
CCL3	0.877442	3.10198	9.34146	0.00224027	0.161648	249	468	186	425	99	95	106	158	67	63	257	110	398	77	82	190	669	245	1045	40	42	203	40	67	294	219	210	57	151	142	345	559	178	405	81	98	106	58	138	241	227	172	185	174
FNIP2	0.405045	7.24813	9.31277	0.00227562	0.162714	3431	3158	2491	5249	4289	6789	3941	3142	5392	4292	6030	4669	3794	2709	4613	4340	6379	3694	6891	2400	3041	3610	2153	2519	2651	1903	4272	2350	4106	4235	3754	4667	2782	3551	3107	4003	2594	2279	3975	3799	3139	2449	4603	3622
NSG1	-0.834668	2.48958	9.31221	0.00227631	0.162714	135	182	181	422	191	31	121	110	68	39	89	125	53	190	308	43	457	244	162	115	35	110	86	47	92	122	37	512	267	94	133	63	190	238	6	88	307	73	29	236	87	276	147	191
CALCA	0.922012	-0.508279	9.27115	0.00232791	0.16459	3	16	16	7	12	12	9	17	0	8	13	12	5	25	1	8	39	20	13	0	9	5	0	2	13	28	8	11	8	4	4	4	20	5	3	10	6	8	17	17	34	13	14	21
THBS1	0.611465	8.62758	9.25353	0.00235042	0.16459	11336	7381	7475	7295	9858	13194	9653	14299	8760	6493	9680	10101	14423	3430	12449	20205	9511	6723	10272	10236	3895	6423	8395	3411	9314	5448	8815	9616	11337	12518	13553	3691	4010	10685	3394	6571	6358	5902	21625	11273	6384	7755	8310	5865
CPXM1	1.6365	1.42732	9.24928	0.00235588	0.16459	21	13	26	5	6	5	13	3	4	0	0	9	1	3	55	4	33	6	113	0	32	5	1	28	33	0	4	9	23	1	4	12	29	3	13	0	4	32	7	3	3	23	8	16
UBE2C	-1.23871	-0.892139	9.24835	0.00235708	0.16459	11	7	31	20	11	7	19	7	12	0	8	0	8	11	29	10	2	129	39	8	4	17	48	10	4	10	4	48	21	6	5	4	28	5	2	1	34	25	8	12	19	79	4	28
ADD2	0.627239	1.37532	9.24141	0.00236603	0.16459	73	67	37	29	64	58	70	43	34	83	102	140	56	80	111	105	70	14	29	34	69	59	37	76	131	45	44	74	55	41	55	76	52	15	32	26	62	68	53	29	36	46	33	54
NRIP1	0.338006	5.3784	9.24057	0.00236712	0.16459	557	696	1088	1041	901	768	1017	992	758	772	862	1312	852	1060	1248	733	1146	934	1219	608	697	607	660	1029	709	405	695	583	821	675	710	890	649	815	661	865	780	852	900	1008	1537	923	1233	950
PJA2	-0.310527	7.61751	9.23093	0.00237961	0.16471	4686	5340	5405	7916	5331	3101	4437	5174	3669	3876	3489	6801	4067	6552	6316	2678	7608	5027	6868	2634	2856	3943	3694	4539	6899	9447	2883	7263	5718	3501	4562	4726	5722	5720	3714	5789	6761	6577	4526	7696	6804	6872	6629	8950
APOD	1.0386	3.36686	9.2023	0.00241712	0.166552	123	230	273	615	202	110	102	223	86	54	118	91	220	44	197	230	288	259	174	65	10	526	34	70	375	882	334	148	130	565	272	302	79	387	15	164	73	94	1157	120	283	122	352	202
DCX	-0.896469	3.15665	9.19081	0.00243234	0.16685	63	167	411	395	480	86	209	227	153	113	168	843	68	348	623	57	327	256	424	185	19	378	42	127	238	448	109	709	419	208	240	516	339	447	47	369	505	269	173	557	214	368	719	412
GNB4	0.480457	3.13017	9.17372	0.00245515	0.167353	82	226	204	303	205	90	163	126	155	111	129	233	106	164	259	164	332	269	322	153	77	243	93	103	158	247	144	297	322	167	206	206	178	182	71	135	212	103	342	282	324	224	295	235
PTPN7	1.08688	-1.50662	9.15426	0.0024814	0.167353	0	3	12	11	1	3	0	0	0	0	17	1	3	9	0	1	1	11	1	3	3	5	0	3	19	13	0	10	22	3	5	4	6	4	2	2	8	6	0	0	4	7	5	0
GBP4	0.638005	3.0867	9.15399	0.00248176	0.167353	165	544	188	224	458	168	128	42	117	63	250	124	353	212	467	64	236	163	647	96	53	279	34	141	395	342	141	155	184	120	182	260	127	155	91	69	163	345	169	234	256	193	209	134
PSG3	-1.40514	1.08455	9.15275	0.00248344	0.167353	30	48	29	12	2	18	95	125	7	22	119	3	3	50	38	26	5	274	7	16	366	20	368	76	115	5	9	2	222	8	21	0	57	58	182	162	23	296	17	15	13	81	6	15
GLS	0.293192	7.07224	9.14191	0.0024982	0.16761	2282	2583	4125	4178	3909	2154	3164	2489	2358	2997	2153	2747	2665	3751	3504	1977	4615	2600	5645	2776	1632	2855	2195	2064	1903	2939	2383	3328	4753	2191	2301	3767	3903	2393	1850	2727	4106	2162	3005	2651	3990	2258	4719	3910
PLA2G4E	1.10938	-1.63214	9.09778	0.0025592	0.169725	5	14	2	9	0	0	3	22	3	12	13	0	24	0	6	0	6	0	13	6	0	1	4	6	12	7	10	0	17	4	5	1	0	8	2	3	2	0	0	12	9	0	3	2
ARHGEF26	-0.390322	2.0329	9.09576	0.00256202	0.169725	126	106	125	166	71	74	80	191	52	37	80	95	153	117	139	54	174	99	213	70	84	57	99	88	66	137	103	178	143	132	57	98	128	77	96	62	154	76	87	112	33	92	131	95
ADGRE2	0.644017	0.865929	9.08528	0.00257674	0.169725	39	71	33	67	26	17	29	21	27	19	19	36	27	17	26	42	37	50	70	19	15	30	8	13	138	191	34	34	44	28	109	48	22	25	15	3	23	12	37	78	18	31	27	24
PTP4A3	0.812521	4.63522	9.08175	0.00258172	0.169725	215	369	440	685	777	205	278	194	208	213	269	320	228	329	279	161	674	296	268	220	229	345	214	154	304	416	188	259	389	99	209	249	459	163	94	177	393	133	335	419	297	244	391	579
GIMAP6	0.796559	0.419761	9.07211	0.00259537	0.169725	8	42	52	61	54	25	17	23	2	2	16	19	12	18	19	16	61	43	50	13	2	40	10	15	27	24	31	30	27	24	27	28	36	24	10	36	14	13	54	66	23	13	38	40
TMEM158	0.492797	2.2689	9.07146	0.0025963	0.169725	114	80	70	230	136	109	65	92	86	159	144	189	78	59	87	119	260	76	111	63	46	46	51	26	37	42	66	76	119	190	78	153	32	213	66	114	45	80	86	77	91	63	178	85
LIMS4	0.588854	4.39537	8.98988	0.0027148	0.176672	464	576	386	524	569	801	379	490	247	410	1098	573	927	315	579	1231	596	529	460	391	318	417	409	202	664	404	544	377	504	557	774	324	312	420	294	405	352	392	769	508	541	524	314	319
LRFN2	-1.00588	2.73066	8.98257	0.00272567	0.176672	54	19	177	374	510	62	72	136	114	86	61	539	39	103	212	24	312	192	327	80	16	177	29	45	70	225	88	422	236	72	176	214	110	251	18	44	185	109	43	229	119	82	94	229
TMEM263	-0.283137	5.5075	8.96854	0.00274668	0.177283	897	872	1592	1574	1523	853	1098	1028	861	940	987	2149	919	1578	1968	687	1941	1087	1672	987	951	974	884	1425	989	1079	654	1462	1562	808	819	892	1172	1145	869	1141	1726	1306	1131	1215	1362	1589	1618	1388
LAIR1	0.6284	1.20191	8.95738	0.00276351	0.17762	33	68	72	53	32	37	50	48	36	16	25	17	80	28	79	85	51	61	52	12	3	37	46	42	170	95	38	53	134	39	48	61	66	43	20	46	38	30	41	36	49	91	47	51
USO1	-0.222465	7.0053	8.91964	0.0028212	0.180569	2731	3044	2781	3786	4018	2986	3658	3790	3297	3502	3887	4717	3159	4227	4480	2735	4418	2536	3958	2230	2886	2667	2937	3806	3865	3762	3161	3840	3749	2717	3107	3064	3421	3388	3285	3789	3240	4247	3216	4465	3895	4097	4334	4366
RTN4	-0.281591	7.89545	8.90021	0.00285137	0.181739	5341	5103	8847	9903	6830	3508	6401	6143	4582	5664	4850	7334	4196	9036	8299	3765	9903	4778	6390	4017	4368	4640	3991	5490	5446	7469	3642	11886	8948	3622	4650	5049	8117	7635	4466	6871	8339	6101	5271	5799	6417	7009	7662	10173
PYDC5	0.804344	-0.889756	8.87073	0.0028978	0.183932	13	14	8	14	5	17	31	15	3	6	17	8	10	10	21	8	9	10	25	6	23	7	6	18	10	8	2	1	14	10	4	22	7	10	16	16	19	16	16	8	17	22	21	8
KCNG3	-0.937506	1.0937	8.85782	0.00291835	0.184471	16	12	40	110	39	17	3	43	65	59	20	99	25	31	34	2	67	39	20	37	3	45	29	28	55	34	3	107	82	21	54	17	14	36	9	36	45	39	17	38	51	35	62	62
ODF3L1	-1.16179	-1.09738	8.84498	0.00293897	0.18501	7	17	44	30	26	0	21	15	1	9	17	21	5	5	28	8	19	42	1	7	0	11	11	0	24	63	3	40	22	3	12	7	18	18	0	6	32	4	0	8	5	8	6	25
HRK	-1.06628	-0.206295	8.83316	0.00295806	0.185449	4	0	0	34	4	33	10	41	0	6	24	5	13	47	3	10	139	19	27	7	3	11	8	6	8	28	9	143	67	10	31	41	36	102	0	1	41	14	6	22	6	78	22	17
POLR2C	-0.267054	5.8099	8.81282	0.00299122	0.186762	3455	1939	1982	2256	1262	1018	1586	1358	1025	1349	1180	1980	1242	1954	1582	1259	1446	1537	1472	904	1224	1064	1142	1869	2986	2085	1431	1943	2135	1127	1036	1217	1597	1369	1901	1280	1276	1888	1462	1314	1224	1926	2096	1728
MMP1	0.877862	8.28575	8.77649	0.00305139	0.189744	13264	19550	5700	24133	4654	3832	5698	3785	1187	2036	4810	5058	10955	1455	3108	4157	39491	4223	11476	4852	467	11334	1870	3062	10196	11781	7555	5254	5913	5392	15509	15106	5373	7602	1307	2088	4117	2767	2600	1718	13945	3569	14484	6019
PCDH10	0.873867	1.80268	8.76235	0.00307512	0.190446	68	100	79	229	106	8	49	38	45	19	32	36	42	105	79	50	198	41	20	17	13	10	20	20	121	49	5	48	97	15	25	24	46	60	0	123	71	38	42	173	124	21	107	194
LAMA2	0.603238	1.87154	8.72625	0.00313661	0.192136	43	108	40	161	39	56	39	46	12	65	43	38	62	69	102	35	175	114	68	59	45	61	44	90	62	173	54	115	130	123	91	83	31	84	28	46	69	58	61	121	69	69	102	73
CMKLR1	0.851182	0.169212	8.72101	0.00314563	0.192136	5	13	34	53	31	12	8	16	1	4	18	15	0	6	20	63	64	38	3	22	0	9	1	9	51	56	2	8	13	30	41	27	30	8	11	5	16	12	37	26	13	31	48	16
OLFML2B	0.964647	1.58988	8.71794	0.00315093	0.192136	21	105	98	122	25	16	100	37	14	0	31	20	23	14	77	38	101	102	48	61	0	77	55	44	25	63	10	112	233	45	72	18	52	40	8	12	51	23	77	18	9	99	125	90
DOCK4	0.652725	2.47593	8.71694	0.00315266	0.192136	49	50	104	103	107	42	90	61	79	71	84	69	30	68	120	98	174	135	148	52	53	103	42	64	50	82	55	99	119	101	83	100	52	129	48	82	125	35	71	96	119	34	56	57
SLC30A2	0.749144	3.03195	8.69485	0.0031911	0.193707	189	159	58	121	370	132	77	124	68	51	150	74	238	227	148	269	154	209	201	54	73	30	74	92	262	26	73	105	102	97	111	80	49	65	106	70	58	84	112	48	92	273	77	47
GUCY1B1	-0.36336	5.70407	8.68682	0.00320519	0.193794	1278	1204	1987	2637	1443	972	1409	1436	692	1045	1098	1795	1148	2235	2748	635	2554	1711	1843	751	1043	1465	1038	1631	2441	2802	1174	2098	1659	826	960	1361	1260	1299	1227	1166	1698	1328	1224	1945	1601	2000	1787	2205
GLI2	0.79322	1.05921	8.62077	0.00332351	0.199962	9	40	73	66	56	23	35	12	30	15	15	66	36	9	12	59	114	80	104	45	8	74	45	21	12	52	42	50	57	26	43	36	37	31	6	20	31	12	49	74	19	31	42	29
GNG7	-0.580766	2.92094	8.61538	0.00333336	0.199962	103	109	123	283	120	56	143	139	83	83	116	218	115	204	232	102	146	245	207	168	139	162	149	164	139	253	71	553	260	51	119	84	210	267	84	129	213	184	84	104	90	288	153	134
MTERF3	-0.310489	3.2322	8.60223	0.00335752	0.200625	179	161	243	341	212	260	201	181	122	251	237	293	165	205	164	205	320	209	478	144	269	310	345	288	218	328	239	219	222	190	174	408	224	285	129	160	218	239	275	465	277	394	442	366
PCDHB15	0.584492	1.46665	8.58753	0.00338472	0.200717	10	30	52	98	84	59	56	32	54	41	23	48	37	32	62	46	89	44	94	19	30	59	26	20	41	26	18	78	71	23	22	19	68	20	4	33	38	24	64	79	76	85	62	64
TMEM150C	-0.512623	4.42284	8.58722	0.0033853	0.200717	644	624	336	1061	965	225	348	524	452	451	416	1369	271	644	661	247	895	809	668	297	367	435	310	370	673	1446	268	1698	837	424	502	418	742	658	320	537	1055	597	390	1022	353	575	720	1519
LIMS3	0.647789	3.91939	8.55945	0.00343734	0.202504	355	402	284	370	424	603	280	373	188	326	821	432	716	234	455	916	428	381	308	277	251	304	297	152	487	270	371	274	359	424	571	237	222	289	215	304	252	294	568	355	411	381	217	216
CD86	0.774716	0.75732	8.55702	0.00344193	0.202504	33	95	50	9	5	18	23	36	0	4	30	35	33	1	53	51	28	25	51	32	0	38	1	55	121	42	34	20	74	33	30	43	36	86	12	31	52	48	33	39	55	40	66	17
NID2	0.638884	2.41473	8.53801	0.00347806	0.203016	77	74	115	164	108	49	70	56	68	32	78	72	85	61	129	105	210	208	225	74	13	132	71	45	82	128	129	202	191	122	98	105	105	103	12	50	103	66	141	156	94	136	148	121
PSG8	-1.14702	0.72892	8.53683	0.00348031	0.203016	64	63	7	31	37	22	30	70	46	27	21	7	11	12	92	23	5	107	22	9	314	21	345	22	16	7	5	1	98	27	28	19	60	91	238	59	34	90	50	12	16	39	3	9
HMMR	-0.752352	0.177437	8.52811	0.00349702	0.203016	17	37	92	40	31	27	39	32	28	22	23	12	14	44	93	45	45	73	39	13	31	34	20	61	33	6	16	48	66	45	11	24	38	50	78	16	57	37	17	41	45	58	25	32
LOC730098	-0.58157	1.35078	8.52464	0.00350371	0.203016	91	61	37	179	134	42	53	35	41	35	72	115	31	40	45	56	86	124	127	43	85	83	72	57	104	184	34	103	30	6	46	54	70	63	10	35	40	125	79	121	126	125	100	131
FGG	1.00972	7.09926	8.51313	0.00352593	0.203533	1918	1310	1872	735	3821	8031	10305	1100	2565	683	2293	966	3588	3788	6925	5336	1265	222	2012	2030	4549	4585	1394	4482	965	650	6138	3760	3074	5990	516	481	941	255	4805	5016	1366	1430	5585	3863	8263	2904	1551	555
FBXO7	-0.262726	6.59112	8.49249	0.00356615	0.204461	2865	2341	2728	4510	3987	1551	2279	2034	1511	1778	2160	3632	2016	2793	2687	1476	4526	3025	3749	1794	1613	2197	1752	2075	2593	4995	1428	3839	2747	1261	2142	2327	2900	3763	1417	2516	3231	3401	2051	3355	1744	3568	2912	4003
PKIB	-0.36757	4.64474	8.4851	0.00358068	0.204461	585	411	773	1920	1177	297	778	710	503	516	402	1130	378	680	981	259	1342	602	1084	495	524	562	413	370	500	879	374	986	835	596	512	898	760	822	276	661	838	494	544	1074	677	808	791	906
HIVEP1	0.245719	4.46408	8.48436	0.00358212	0.204461	499	563	540	642	394	490	500	626	424	385	499	610	323	358	599	419	769	403	636	425	370	339	261	388	494	395	453	361	509	464	487	384	432	667	401	632	452	590	537	548	424	490	521	670
GHRL	-1.34763	5.5197	8.45846	0.0036335	0.206433	996	1789	4564	1747	3014	780	2390	754	317	920	1633	1840	1143	731	10751	216	2297	600	1339	223	112	528	128	165	51	446	4119	873	4305	28	219	7197	339	608	166	316	3791	847	843	321	967	1058	3544	4649
MEDAG	0.684746	1.76636	8.4479	0.00365465	0.206433	32	86	80	97	52	42	107	47	26	42	47	58	159	11	42	74	206	112	107	31	8	139	12	41	22	99	78	31	79	80	95	106	43	114	29	26	16	15	123	66	57	27	129	44
GREM1	0.635532	5.59815	8.44666	0.00365714	0.206433	1206	1893	2387	1852	1054	465	791	642	829	559	501	1125	699	851	1017	658	2665	1620	2068	942	159	1398	290	795	948	2200	259	1471	2525	1272	1398	1741	1424	2008	210	395	1237	548	766	737	675	1716	1318	562
PTGS1	0.561454	2.34425	8.43036	0.00369007	0.207367	139	176	153	151	67	85	46	73	24	31	67	93	168	73	80	80	250	209	119	68	3	96	49	86	233	310	99	112	166	113	165	86	68	106	12	35	63	52	128	170	90	116	271	57
NEFL	1.2327	-1.02421	8.42508	0.00370081	0.207367	2	0	15	0	2	7	19	1	3	0	2	7	0	6	26	7	35	5	8	0	0	15	7	1	8	1	0	27	14	7	6	6	9	13	0	2	4	1	24	5	0	3	10	0
CCL3L3	1.07923	0.917536	8.39013	0.00377263	0.21062	57	37	50	151	25	18	23	13	31	11	40	8	101	2	25	10	125	16	327	0	7	112	0	9	60	10	11	14	24	8	51	154	52	77	8	14	29	29	38	52	66	33	30	0
RMDN2	0.544197	4.24559	8.36923	0.00381627	0.212282	682	812	542	913	489	289	334	500	163	610	249	392	440	530	282	237	1004	326	649	242	308	448	328	283	344	760	522	383	519	438	703	410	362	1134	365	318	211	628	320	343	416	296	542	715
ARHGAP6	0.552806	0.180425	8.35865	0.00383856	0.212665	13	19	22	34	33	14	22	18	16	12	25	30	44	15	15	44	41	13	40	16	10	25	10	12	9	24	27	44	20	21	11	20	14	28	26	18	14	10	70	28	2	15	35	12
NDUFS1	-0.205263	6.47788	8.35268	0.00385118	0.212665	3039	3495	1987	2638	2166	1657	2374	2277	1605	1856	2146	2953	2180	2390	2311	1532	2871	1815	2802	1454	1708	1781	1972	2250	3508	3450	1741	2696	2905	1871	2084	2366	2579	2804	2220	2750	2357	2735	2296	2835	2433	3130	2871	2955
FPR3	0.773839	1.49354	8.34624	0.00386486	0.212665	24	48	102	90	47	37	22	71	28	19	13	16	41	88	77	91	58	59	77	14	6	60	40	17	111	66	19	89	183	37	45	50	109	57	25	12	53	51	91	33	50	66	81	98
PAK5	-0.668503	0.120274	8.33016	0.00389922	0.213786	15	22	11	71	32	6	21	18	21	12	14	11	20	29	27	25	42	19	40	12	1	10	50	17	20	47	5	68	19	6	29	25	12	13	33	33	29	39	6	18	25	49	8	19
FGD5	0.799936	0.73099	8.30632	0.00395073	0.215837	22	10	19	74	57	2	29	11	1	12	30	37	39	6	54	25	42	72	105	29	0	32	9	17	40	40	23	69	44	26	42	37	18	43	1	8	14	21	35	63	36	20	39	15
RASA3	0.572584	2.26419	8.22681	0.0041276	0.224697	67	67	89	94	91	43	62	40	74	53	103	58	76	24	79	52	128	122	113	76	47	146	26	36	30	66	60	148	117	83	115	97	63	113	38	105	73	71	124	152	71	88	94	88
THBS2	0.79414	4.15175	8.19927	0.00419073	0.22686	142	410	693	590	291	61	278	70	115	41	173	127	253	145	417	169	1341	435	180	179	20	275	158	307	273	124	164	302	984	218	345	242	142	224	38	84	396	77	399	503	458	387	306	301
GPRASP3	-0.373203	2.33524	8.19656	0.00419698	0.22686	122	126	166	248	173	58	91	133	76	82	112	105	59	155	216	79	246	96	176	82	65	86	99	134	155	210	97	158	174	87	119	136	125	150	63	164	247	166	119	211	129	166	226	248
S1PR3	0.54443	2.85375	8.17144	0.00425552	0.229214	110	195	121	413	249	60	153	97	32	97	94	93	124	154	113	116	714	277	506	91	46	226	33	47	159	132	147	150	284	172	234	234	92	120	76	61	68	59	187	263	192	106	279	209
ACAT1	-0.48065	7.07325	8.15052	0.00430487	0.230127	4180	5445	6018	7825	5165	2684	3142	3586	2833	2801	3696	4238	4009	5813	4785	2972	5649	4738	4708	1820	2121	3985	3538	3128	6762	8028	2027	6229	4671	2018	4362	2775	5148	3942	2335	2902	5400	2885	3499	4788	5337	4845	5106	6777
ARMCX3	-0.231868	6.44763	8.14887	0.00430881	0.230127	1892	2026	2300	3198	2975	1974	2149	2007	1535	2259	2519	2749	1895	2645	2621	1716	2942	2415	2596	1340	1709	2052	1966	2510	2036	3251	1777	2759	2647	1611	2159	2036	2400	2724	1878	1979	2370	2163	2035	2887	2556	2433	2745	3185
ARHGAP15	0.808538	-1.22584	8.14517	0.0043176	0.230127	13	9	8	7	2	2	3	13	0	0	12	13	8	11	13	12	5	8	3	20	3	10	4	16	18	20	5	10	26	5	7	3	3	3	0	8	23	7	1	2	7	24	8	4
EVI2B	0.628703	1.29178	8.1113	0.00439902	0.233382	31	63	166	75	65	32	39	95	6	13	29	46	85	55	76	52	43	57	84	36	7	48	44	43	123	63	21	56	109	40	83	99	84	68	32	33	82	111	52	50	41	101	80	82
HOXB4	0.736838	-0.990654	8.10255	0.00442031	0.233382	2	6	7	20	13	2	11	2	1	3	5	10	7	14	14	8	16	8	10	2	0	19	3	2	4	3	6	14	18	26	13	11	8	8	3	6	4	0	9	20	8	21	12	15
SEMA6B	1.32995	1.32815	8.09811	0.00443114	0.233382	4	3	24	22	30	2	9	6	7	0	2	25	3	13	8	14	34	19	25	13	1	12	3	3	4	7	10	11	9	6	19	12	3	7	0	0	2	2	8	12	7	10	10	6
LPL	0.786664	0.972294	8.09461	0.00443971	0.233382	54	101	12	50	48	4	29	32	8	17	16	10	25	18	55	28	74	56	84	37	0	105	24	16	43	62	30	44	85	75	16	161	29	37	0	0	35	19	77	55	26	34	60	28
ANXA13	-1.36763	-0.27496	8.08256	0.00446933	0.234135	29	194	29	13	16	5	14	30	0	2	5	17	19	4	10	0	7	16	3	60	0	12	5	18	8	0	1	4	61	0	0	19	27	99	10	10	12	175	8	9	1	7	9	5
ELF4	0.521413	2.91141	8.06471	0.00451358	0.235646	128	114	133	163	125	129	95	84	55	144	89	132	116	116	110	72	137	147	258	101	105	86	114	46	145	134	79	110	164	106	149	138	152	173	115	129	94	145	139	129	104	129	130	124
AEBP1	0.85354	3.82919	8.05149	0.00454662	0.236482	65	109	343	282	259	77	207	79	98	75	185	138	186	115	298	207	309	506	304	151	27	358	154	141	62	146	107	337	451	138	186	185	189	176	20	65	212	69	236	304	131	268	300	266
ARSI	0.923391	0.292144	8.04596	0.00456052	0.236482	14	10	23	41	33	1	25	4	0	4	14	9	21	11	33	9	61	44	19	15	0	42	0	6	9	13	31	42	6	12	18	27	29	41	4	9	18	8	16	16	14	34	30	33
LILRB3	0.651612	-0.326545	8.03618	0.00458521	0.236959	42	31	7	32	21	11	5	23	0	6	5	6	3	8	18	12	14	17	24	3	8	5	10	9	29	17	17	5	19	12	26	13	13	7	8	6	21	6	17	16	8	17	6	20
INHBE	1.02541	-0.804962	8.0274	0.00460748	0.237309	14	2	14	9	1	19	3	1	0	6	4	11	3	3	20	14	24	6	10	3	13	5	11	6	16	25	0	0	0	0	4	3	1	11	6	3	1	11	1	1	2	1	6	23
IL33	0.855671	4.45121	8.01488	0.00463945	0.237755	174	774	700	975	442	184	360	94	172	148	269	282	1248	328	86	480	4329	424	775	69	87	934	188	237	858	392	342	70	342	558	641	1273	132	456	178	112	165	222	410	242	1221	246	986	415
HMCN1	0.959811	0.250965	8.01184	0.00464724	0.237755	0	2	35	26	17	3	27	2	20	0	2	12	5	16	19	41	66	67	13	2	10	20	3	9	4	30	9	33	70	19	20	6	14	16	1	6	17	48	20	28	10	20	17	8
SYNDIG1L	-1.39346	0.0286067	7.96627	0.00476571	0.243004	3	17	12	23	2	11	16	22	44	4	1	19	0	20	1	5	28	21	2	9	5	15	0	6	11	3	1	28	5	1	5	9	12	11	1	5	25	8	6	0	13	1	5	29
GRSF1	-0.214773	6.54603	7.9405	0.00483404	0.245669	1896	1930	2862	3103	2353	1908	2785	2212	1878	2730	2159	2440	1896	2755	3383	1539	2856	2124	2546	1762	1723	2035	1797	2194	1947	2459	1476	2936	3126	1629	1950	2116	2616	2525	1840	2517	2584	2384	1996	2658	2756	2478	3327	2916
DCN	0.73788	5.51295	7.92516	0.0048752	0.246695	1183	3834	2472	2287	792	188	653	441	318	317	388	551	1094	1250	806	762	5804	1057	738	252	96	1556	586	1028	1811	1460	331	588	3467	1165	1001	882	547	1382	387	168	919	740	1432	463	1164	1015	1020	1417
ARHGAP9	0.752465	-1.09478	7.92098	0.00488649	0.246695	5	2	5	9	4	3	5	12	3	1	4	6	16	1	2	3	15	5	9	0	8	4	1	17	10	7	7	4	4	12	17	1	11	3	11	15	8	8	8	9	4	8	13	1
YIF1B	-0.402224	3.55508	7.90567	0.00492801	0.247973	482	507	339	301	271	200	315	253	129	289	316	255	163	230	272	266	208	356	338	251	342	229	320	225	345	287	211	173	323	116	141	252	185	831	235	228	116	735	247	288	314	357	300	221
TRPA1	0.591715	1.7428	7.89011	0.0049706	0.249025	30	73	53	57	50	129	62	175	82	139	94	68	97	63	102	95	115	92	200	58	52	46	68	108	73	30	111	39	98	82	143	132	47	104	92	76	73	37	79	107	62	94	46	55
PLD6	-0.41105	1.92114	7.88127	0.00499494	0.249025	71	64	89	92	91	57	63	58	79	83	178	220	102	192	125	59	139	83	96	45	139	49	128	119	74	91	34	103	88	45	117	88	72	115	120	133	77	169	105	40	65	175	220	134
GAREM1	0.262989	4.82032	7.86659	0.00503564	0.249025	687	681	721	949	709	583	762	753	435	461	461	497	635	1069	918	503	1039	471	719	465	552	350	541	788	808	371	538	509	798	521	595	577	609	521	953	568	504	877	648	539	573	605	677	1035
BCO2	-0.453806	1.77922	7.86599	0.00503732	0.249025	60	160	67	116	121	53	99	129	79	58	47	43	34	57	89	52	140	161	110	82	73	88	82	162	62	95	50	106	123	61	94	84	100	157	130	61	117	149	72	58	27	99	73	142
COL6A3	0.737177	7.02401	7.86185	0.00504888	0.249025	1115	2138	4497	2963	1212	664	2428	1116	1017	710	1516	1538	1637	2147	3826	1720	4474	6358	2339	1645	117	3328	1290	2284	1615	2466	1444	3348	7240	2170	2187	1328	2470	2256	348	885	3271	1087	3862	2157	2087	3196	2980	2908
MAMDC2	-0.325508	3.61453	7.85928	0.00505605	0.249025	229	338	273	650	306	211	288	300	188	324	326	581	204	279	319	250	512	167	489	182	202	244	185	239	296	538	173	317	275	238	307	208	371	464	208	317	400	337	316	404	443	383	336	631
LPAR1	0.343337	2.87721	7.85684	0.00506287	0.249025	183	287	248	187	155	112	176	185	65	111	127	129	196	208	195	124	259	96	233	103	174	189	186	251	354	267	146	132	266	159	112	142	200	184	154	102	137	203	151	59	296	177	218	195
CTNNA3	-0.825874	0.503422	7.80733	0.00520346	0.254806	16	34	27	53	45	9	57	43	56	47	13	82	8	73	66	23	21	38	48	10	0	26	17	7	37	82	17	95	38	14	40	20	72	67	0	109	80	25	37	99	29	61	67	79
FTCD	-1.43252	1.00937	7.80377	0.00521372	0.254806	3	12	31	75	37	10	7	9	31	5	3	41	14	59	16	0	8	61	52	12	0	6	21	5	0	20	7	54	37	3	5	6	39	27	0	12	23	4	1	8	5	21	8	32
TCN1	-1.14889	5.53513	7.79047	0.00525225	0.255872	1571	1103	1119	76	818	351	8202	627	168	31	2038	401	453	4334	8191	209	177	102	384	442	3400	944	299	3700	3469	105	541	127	1768	123	92	95	539	4097	3636	250	656	7511	5295	40	1207	4211	219	455
IFIT5	-0.286958	5.19289	7.78211	0.00527662	0.256243	1209	1099	1072	1478	1123	862	993	848	635	1013	992	1191	1049	1266	1224	916	1749	929	1497	736	754	836	629	711	1126	1270	756	881	1187	669	834	1019	1229	1256	827	1107	1129	1077	1076	1306	1599	964	1330	1382
KLF11	0.235679	4.68184	7.77089	0.00530949	0.256497	767	391	469	693	614	573	667	488	429	526	482	872	490	558	594	391	850	746	623	417	547	446	552	566	418	533	359	491	768	456	477	537	526	857	369	609	678	847	763	441	547	585	508	569
P4HA1	-0.546657	5.63785	7.76888	0.00531539	0.256497	1245	1406	1624	1004	726	604	2143	799	802	848	1191	1168	1034	2675	2781	512	1123	700	1380	620	1097	815	645	3211	3517	865	759	588	969	586	862	991	1016	848	1375	789	791	1568	806	958	4513	1248	1165	839
CYBB	0.614783	2.69739	7.74877	0.00537492	0.258088	153	184	325	174	100	47	178	289	76	31	71	91	108	168	421	177	157	84	112	109	41	87	51	132	493	127	80	127	177	161	111	213	97	120	129	57	181	156	251	113	87	144	137	107
FBLN2	1.48322	-0.132392	7.74635	0.00538211	0.258088	7	21	11	18	3	1	0	8	14	0	1	6	1	11	10	0	1	19	8	3	1	10	3	5	18	3	8	2	14	3	18	3	1	7	0	0	11	2	5	0	8	3	5	2
SEMA5A	-0.424738	5.25902	7.67657	0.00559424	0.265459	663	841	1198	2198	1400	543	642	1092	821	971	773	1760	809	1322	1528	469	1149	760	1246	733	543	718	728	681	721	1308	539	2057	1424	562	886	1035	1185	778	480	1069	1539	1398	836	1007	692	1478	1179	1647
REN	-0.855629	-0.651726	7.67615	0.00559554	0.265459	55	16	18	14	7	10	0	29	0	6	17	19	20	20	11	57	25	27	29	1	12	14	10	7	68	19	11	33	32	20	22	26	28	51	13	2	38	20	16	12	7	30	12	3
NES	0.86528	2.2449	7.6738	0.00560284	0.265459	8	41	69	88	53	24	67	8	31	27	37	57	59	24	55	48	104	111	115	25	19	112	19	61	39	70	99	66	92	51	74	42	63	76	10	28	50	15	119	120	65	66	120	36
TPD52	-0.441592	7.97156	7.67095	0.0056117	0.265459	5606	5295	9083	13738	10361	3538	5922	6477	4819	4817	4069	11488	4867	10784	8812	3100	11955	6488	10070	4136	3080	5907	4065	4367	7642	13248	3233	14525	7804	4083	5748	7174	8994	8894	3405	7268	9686	8357	6492	11865	7412	9184	11185	12686
TFF2	-1.30327	3.31722	7.66745	0.0056226	0.265459	3244	1361	281	12	44	345	896	457	41	248	46	203	57	59	128	17	4	38	216	308	167	24	195	72	113	11	0	7	232	15	115	61	1053	2365	102	458	81	2643	205	164	122	55	215	7
SPON2	0.785053	3.46482	7.66115	0.00564225	0.265568	49	183	126	403	128	67	179	120	85	48	132	113	105	125	258	133	289	403	323	173	6	277	99	88	141	71	90	195	291	132	163	99	234	136	19	92	191	96	150	74	141	109	209	169
PALMD	-0.500248	2.6627	7.65546	0.00566007	0.265589	151	132	214	226	187	227	253	165	81	266	72	241	183	288	176	60	296	271	257	83	126	155	67	548	73	228	204	103	157	89	287	113	174	177	149	558	138	277	115	254	163	384	256	196
OLR1	0.603379	1.64415	7.61665	0.00578318	0.268965	94	100	98	98	23	28	36	61	93	60	29	17	40	38	95	130	136	118	65	38	7	87	47	85	120	121	33	89	146	117	80	111	77	61	37	34	115	39	68	49	56	50	39	118
SRD5A1	-0.427238	4.37344	7.61633	0.0057842	0.268965	272	248	482	1228	791	296	394	633	268	388	321	1294	357	671	669	310	1227	510	451	234	305	295	394	289	220	391	244	803	347	226	425	376	253	1019	369	460	557	628	382	694	371	456	621	1043
PKP2	-0.253425	4.15936	7.61616	0.00578476	0.268965	450	261	304	608	468	339	421	502	529	504	555	561	331	507	814	239	605	392	420	246	375	246	368	436	228	304	432	476	441	284	381	389	358	770	474	502	455	706	454	436	274	500	558	467
NMRK1	-0.277211	4.9089	7.60145	0.00583215	0.269965	709	743	960	1205	1104	941	745	957	790	609	1119	1007	570	737	1072	827	1327	976	776	568	673	542	564	738	889	654	622	1049	984	456	679	802	691	1049	483	797	767	788	878	712	982	1001	609	1026
DCK	-0.27793	4.31614	7.58914	0.0058721	0.269965	473	309	599	599	431	368	503	426	434	508	374	671	375	543	470	335	692	695	622	372	410	512	276	364	352	827	269	721	718	339	402	505	565	657	360	589	505	571	450	529	560	596	714	641
PRKD1	0.374746	3.23222	7.58873	0.00587342	0.269965	92	85	164	184	162	276	180	291	173	318	239	164	200	253	384	145	188	240	212	164	301	182	242	247	89	114	201	150	279	174	176	196	185	115	255	305	197	204	177	243	244	249	235	194
C5AR1	0.580577	1.66753	7.58768	0.00587686	0.269965	79	88	66	131	59	19	29	85	26	27	28	48	45	43	88	166	107	91	206	23	12	90	20	31	72	91	33	54	163	78	123	123	49	89	14	19	47	50	74	37	38	58	46	68
MUCL1	1.36007	-0.387613	7.58063	0.00589987	0.270211	55	75	87	54	11	1	34	3	0	0	1	0	4	9	0	8	4	5	64	0	14	8	3	4	16	7	2	0	3	12	9	14	4	23	11	4	0	37	12	0	5	0	2	65
THAP3	-0.19917	3.81217	7.5606	0.0059658	0.270788	455	523	350	446	412	372	423	368	337	363	410	395	298	393	275	294	463	408	451	240	306	338	295	275	391	550	273	375	353	310	286	361	351	333	262	292	296	400	296	391	283	381	424	453
ANKMY2	-0.372226	4.96435	7.56055	0.00596597	0.270788	749	699	1230	1300	716	835	1015	967	584	723	701	1171	812	1255	1400	737	1197	963	1025	584	662	632	830	1057	1220	1117	469	1388	953	629	920	896	942	1116	838	786	1051	1023	841	957	1046	1294	1106	1225
IL6ST	0.22843	7.61017	7.55861	0.00597242	0.270788	4295	3924	4839	5643	5499	3440	5460	4720	4355	3519	3989	4262	4759	5112	6746	2956	7513	4293	6736	3040	3470	3463	3115	5467	3411	3276	3491	2659	4723	3330	3523	4715	3143	4029	4652	3901	4193	5045	4774	5222	6631	4905	5796	5524
SCD	-0.384988	8.68126	7.55533	0.00598329	0.270788	11079	9620	10681	17123	15322	12450	7356	7907	8688	6784	11756	20997	10993	10656	15106	6031	19765	15662	14892	6783	3893	11723	7437	13638	20361	16371	8400	13293	10832	5111	13236	9039	12290	10302	11652	8410	9960	9869	11328	8828	9903	13082	13533	15992
C1QB	0.838678	1.6675	7.54269	0.00602541	0.27189	49	84	93	30	12	8	35	65	22	29	56	42	78	103	65	138	38	122	48	37	0	36	32	45	119	72	22	134	297	43	59	52	75	69	12	40	101	30	85	21	35	168	33	46
ECEL1	-2.10449	3.55168	7.53674	0.00604533	0.271987	16	6	25	3	72	12	12	1	13	10	4	24	0	65	56	1	12	6	9	13	13	5	6	13	1	33	17	20	7	0	3	16	1	9	0	2	22	32	1	18	3	34	17	30
VSTM4	0.642203	3.21637	7.5299	0.00606832	0.27222	87	265	233	452	179	55	108	118	153	83	116	200	253	98	258	130	781	403	260	93	17	252	57	106	296	449	189	292	238	138	309	113	216	190	17	111	138	99	250	233	146	135	288	241
PDCD1LG2	0.945649	-0.571363	7.51509	0.00611842	0.273665	12	49	9	12	16	15	2	4	0	0	11	7	13	8	3	0	13	4	73	8	19	35	1	18	26	30	1	4	30	9	23	38	9	27	16	0	14	6	2	24	14	19	29	13
C15orf61	-0.412524	2.43774	7.49977	0.00617069	0.275198	116	111	189	315	178	88	117	151	146	118	130	271	75	186	188	83	245	135	172	89	73	118	67	53	90	197	59	258	176	99	107	126	146	265	38	160	233	137	128	231	168	187	228	228
CORO1A	0.918095	-0.194816	7.49299	0.00619395	0.275433	7	35	3	6	3	12	3	1	7	5	11	2	7	7	18	7	2	8	18	6	5	4	2	13	27	16	8	9	8	6	10	10	5	12	14	2	10	6	7	10	15	3	7	9
LAGE3	-0.332049	3.13887	7.4862	0.00621738	0.275673	227	205	254	493	341	156	274	242	126	162	226	658	237	402	300	187	445	157	363	143	167	257	132	186	248	364	127	276	229	148	110	236	261	239	160	191	273	273	234	300	284	254	260	283
ITGA9	0.506694	0.497992	7.47555	0.00625423	0.276133	15	16	35	33	35	22	52	24	13	41	4	23	16	43	37	25	38	35	21	9	27	10	5	40	22	41	22	69	23	32	41	22	27	14	22	20	24	18	45	16	26	45	13	22
AMZ2	-0.294483	5.69259	7.47278	0.00626386	0.276133	1275	1243	1687	1722	1387	1593	1896	1437	1224	1401	1504	1547	1363	1854	2079	1251	2030	1604	1615	865	1201	1404	1298	1624	1425	1468	1162	1779	1943	904	1334	1151	1414	1661	1532	1391	1564	1525	1212	1604	2073	2269	1824	1866
FERMT3	0.542755	0.977636	7.43816	0.0063855	0.278883	43	19	35	44	40	38	31	29	14	20	32	15	32	42	64	36	55	46	35	40	30	45	32	42	38	27	22	17	55	16	34	41	30	39	36	23	30	41	36	31	25	37	38	29
FBXL7	0.794971	0.0108552	7.43797	0.0063862	0.278883	9	18	22	109	8	4	21	1	30	2	5	3	18	3	32	11	65	46	38	25	0	24	1	6	12	20	12	36	38	15	28	8	27	1	2	19	20	6	26	11	6	17	20	31
COL3A1	0.766506	7.33965	7.43493	0.00639699	0.278883	2341	4999	7953	3535	1205	548	3137	1377	759	710	976	1166	1253	3702	7294	1988	6221	5308	2625	1829	244	2492	1770	2772	4455	4612	1840	3718	11547	2204	2434	1045	2770	1883	482	769	3933	1586	2536	879	1828	3185	2542	3425
MRC2	1.16427	2.71957	7.43432	0.00639916	0.278883	20	22	108	76	14	10	40	15	8	15	17	32	18	55	87	25	97	95	71	41	2	70	15	37	30	21	28	48	131	32	40	17	45	47	10	15	45	14	40	27	23	39	30	57
CDC6	-0.469091	1.48314	7.4269	0.00642559	0.279239	93	84	126	55	100	71	88	91	48	81	131	41	59	65	56	47	105	125	148	81	22	118	93	39	52	93	136	108	66	97	84	79	103	54	68	70	51	66	116	93	109	107	134	50
SYNE4	-0.342155	2.96731	7.39985	0.00652295	0.282667	300	306	223	366	314	88	167	154	103	132	148	184	186	278	239	91	260	225	290	110	136	237	176	141	216	342	148	276	196	108	189	200	265	229	188	108	196	209	139	198	97	202	176	274
C21orf62	-0.631072	0.753756	7.39045	0.00655712	0.282769	31	47	60	113	116	16	42	61	7	21	19	83	47	89	57	33	55	30	71	21	19	40	33	38	57	64	12	116	53	32	12	56	58	38	27	41	92	43	24	38	18	77	80	54
EXTL2	-0.35213	3.67578	7.38903	0.00656228	0.282769	162	238	421	689	262	255	203	353	320	271	249	554	316	425	414	305	628	424	349	273	170	229	285	272	338	489	224	638	597	285	337	336	331	406	271	359	374	440	262	527	320	526	457	547
SLC37A2	0.936816	0.00234901	7.38087	0.00659213	0.283258	23	18	13	22	4	16	3	15	27	2	16	0	7	6	19	36	7	16	11	5	0	10	8	7	69	39	7	19	47	12	19	25	4	15	12	0	6	2	5	8	2	15	11	18
IL2RA	0.928466	-0.391978	7.37219	0.00662402	0.28347	0	39	10	27	6	19	26	27	13	0	25	23	8	6	36	20	61	18	78	7	5	11	0	8	48	27	3	25	24	28	15	34	9	2	10	5	15	3	4	1	23	13	6	10
GRAMD2B	-0.347126	5.0959	7.36503	0.00665044	0.28347	1287	1048	1225	1871	1429	600	1046	1051	747	889	866	1576	788	1210	1296	449	1467	814	1227	532	202	807	936	799	1003	1364	605	1587	1144	683	653	940	1009	1099	789	728	1236	994	912	946	990	1248	1405	1509
MUC4	0.997217	1.4842	7.36322	0.00665716	0.28347	70	84	48	11	41	37	129	14	14	13	25	29	4	40	37	50	21	5	58	6	46	55	14	14	17	7	7	13	47	12	3	35	25	281	11	34	56	80	36	10	6	7	10	1
ATP6V0D2	0.783536	0.155337	7.35704	0.00668005	0.28347	19	16	35	40	37	5	17	41	0	7	13	6	6	18	83	26	44	54	40	26	2	46	2	19	36	44	19	26	87	11	33	20	52	12	12	13	44	19	33	5	6	17	31	9
ADAMTS3	0.810372	0.14378	7.35241	0.00669731	0.28347	6	18	18	12	30	18	5	0	3	30	12	11	38	0	5	56	50	19	24	22	14	49	24	5	14	19	1	39	48	24	43	31	2	32	4	25	10	6	80	43	52	4	69	22
FIG4	-0.240085	4.55148	7.34947	0.00670826	0.28347	559	846	781	805	616	382	642	738	333	480	555	612	590	737	825	378	876	507	790	391	525	616	604	543	868	975	459	785	829	343	499	462	711	695	584	617	835	814	505	867	623	902	657	875
TMPRSS11E	-1.20312	-0.342317	7.34183	0.00673684	0.283894	3	19	27	4	13	1	13	5	11	47	11	27	0	1	68	0	10	23	11	6	80	43	31	59	19	22	17	3	26	26	28	8	6	8	27	36	20	70	21	0	12	141	9	33
SLC5A4	-1.08116	0.382337	7.30846	0.00686306	0.288418	29	49	19	84	93	7	14	15	0	1	0	147	7	29	18	7	63	50	86	0	2	8	5	1	28	110	15	180	25	32	18	19	25	20	0	11	47	39	1	12	12	30	11	41
OTC	-1.44251	-1.32037	7.27466	0.00699342	0.293091	11	0	2	3	4	22	10	22	12	8	0	0	0	5	0	0	1	0	0	4	29	2	4	19	6	0	0	1	38	6	8	0	10	141	11	9	0	53	3	2	9	34	3	0
RNF19B	0.274329	5.1311	7.26248	0.007041	0.294279	795	710	555	1292	1051	802	694	660	606	735	728	1013	671	605	689	496	1430	1021	1292	480	666	637	469	549	661	414	437	698	780	622	767	744	769	893	581	774	646	813	757	721	648	596	790	782
PHYH	-0.341239	5.1766	7.25646	0.00706466	0.294463	977	1034	986	1231	645	854	1085	1201	626	863	776	655	631	1377	1291	942	1258	1448	1107	767	929	1028	1189	1293	1340	924	747	2003	1575	536	1026	634	1410	1017	1036	1006	1214	1122	1001	783	500	1164	717	1225
TCEANC	-0.441851	2.25043	7.24284	0.00711841	0.295346	142	139	192	228	126	87	91	157	119	137	78	176	95	113	268	103	230	144	286	76	77	91	126	91	122	184	80	293	220	122	95	98	161	160	110	165	224	87	131	164	108	172	183	168
SATB2	0.316922	2.4444	7.23286	0.0071581	0.295346	149	79	113	106	71	83	200	105	154	87	120	105	110	187	166	116	182	102	163	105	151	95	92	145	128	79	65	73	152	131	100	125	92	68	121	145	102	81	135	59	80	150	133	148
SPC24	-0.840601	-0.726089	7.22904	0.00717337	0.295346	21	5	70	10	15	6	27	9	2	11	13	11	4	20	45	8	22	97	20	19	7	9	9	23	20	13	4	44	44	9	6	7	43	4	4	9	51	21	15	14	1	30	16	44
ANKRD1	-0.745652	4.89127	7.22152	0.00720346	0.295346	1019	980	154	382	261	1163	1115	2124	643	1572	1131	456	322	128	673	1482	117	1802	532	562	2240	325	1484	287	157	208	379	322	1007	708	1245	395	1116	3465	940	1235	507	1256	728	1344	582	1030	343	385
CDH11	0.590523	3.98828	7.21945	0.00721179	0.295346	156	444	451	667	289	109	332	203	170	135	271	243	309	188	459	215	1133	620	544	295	27	644	142	137	335	536	346	531	657	332	506	337	442	334	75	217	423	120	567	555	394	429	652	492
THAP2	-0.405204	2.89761	7.21498	0.00722977	0.295346	159	182	229	402	192	95	250	193	225	159	147	271	176	289	282	142	319	54	287	109	107	181	99	158	171	244	121	194	203	131	157	193	222	217	139	242	264	199	139	200	288	217	338	273
MEI1	0.751597	-0.367326	7.20992	0.00725016	0.295346	18	44	11	21	5	10	2	4	3	9	2	0	37	47	5	9	60	14	44	14	4	29	20	7	39	34	26	16	14	10	20	13	0	33	12	8	9	10	10	26	29	13	21	9
PCSK1	-0.865064	8.01908	7.2002	0.00728954	0.295346	4149	4999	4779	16398	10047	1496	1876	2889	2029	3058	1924	29774	2559	6834	6056	1453	13378	1852	5474	2392	736	2192	1205	604	5256	22863	3218	11808	5712	2999	4283	3889	4473	6825	184	6150	6309	11903	3142	14089	2479	7441	8775	11667
SPON1	0.599999	3.03775	7.19977	0.00729129	0.295346	101	179	298	213	176	59	158	65	57	91	184	82	182	138	164	216	629	303	171	74	22	176	128	147	130	102	91	163	232	97	142	119	141	116	28	122	87	120	330	170	219	143	216	120
WLS	-0.213853	6.56988	7.19718	0.00730181	0.295346	2324	2229	2457	2694	2433	2014	2989	2678	1508	1936	2886	3585	2078	2946	2753	2279	2552	2084	2051	1146	2418	1549	2340	2439	2497	2331	1943	2056	3019	1878	2210	1768	1748	2932	3012	2190	2098	4153	2223	2310	1476	3253	2538	2569
BIN2	0.801279	-1.20513	7.1963	0.0073054	0.295346	3	7	12	7	0	5	0	0	6	0	11	40	0	12	5	19	22	5	4	1	0	5	0	3	9	18	6	3	10	0	13	8	4	18	1	4	8	13	3	2	5	10	16	17
GCNT4	-0.591367	6.3297	7.19332	0.00731753	0.295346	3198	1697	1924	2302	2108	2513	3337	3176	2106	2846	2171	2873	1548	3109	2551	1479	2080	1545	3917	2627	4782	1982	3846	3221	1393	1848	1731	2122	3455	2394	1312	2132	1821	3190	3646	3697	3169	4269	2308	2667	2037	3665	3226	3515
ATP8A2	0.746011	1.71542	7.15884	0.00745954	0.300286	19	122	87	133	135	3	69	77	26	51	31	46	58	82	47	44	180	24	35	73	1	125	19	17	227	158	28	67	115	34	73	31	54	22	12	45	107	70	125	83	57	13	93	307
LAMC3	0.902972	2.36852	7.13196	0.0075722	0.302385	49	79	60	164	85	26	19	15	7	18	27	63	51	31	67	34	114	119	90	50	0	86	9	19	48	112	73	85	103	72	59	67	53	59	10	21	44	25	78	87	40	46	102	45
CNGA4	-1.07274	-1.10564	7.12827	0.00758779	0.302385	3	20	3	12	6	4	8	13	20	2	7	18	4	3	49	1	1	4	25	8	0	1	0	0	10	30	0	43	7	5	31	12	18	23	0	5	15	9	0	3	4	11	13	16
AACS	-0.458788	4.68501	7.1245	0.00760378	0.302385	428	420	501	605	573	345	461	447	399	563	549	955	404	750	644	376	678	608	440	381	497	502	455	508	290	499	321	880	742	208	480	305	439	642	376	490	519	641	385	437	472	567	626	683
GRK5	0.699299	1.12605	7.1199	0.00762329	0.302385	19	28	60	72	65	17	66	15	15	17	28	13	28	14	62	40	57	22	28	32	15	47	11	8	17	19	20	38	31	9	32	50	15	2	28	14	13	10	15	30	14	19	31	36
ALOX5AP	0.688124	3.50054	7.11735	0.00763413	0.302385	250	276	601	418	149	169	184	628	75	143	144	290	334	328	693	359	510	472	158	158	49	234	179	265	1084	289	186	264	521	320	232	126	199	231	207	117	296	308	273	120	301	181	268	251
EDN2	-0.92294	0.29747	7.11654	0.00763759	0.302385	88	30	13	0	0	17	230	23	1	9	41	22	19	23	37	14	11	7	6	26	36	12	33	24	139	12	1	14	36	13	22	10	9	44	44	46	20	75	24	15	67	37	16	21
CTDSP2	0.264235	7.12779	7.11104	0.00766107	0.302385	3252	2973	2483	2880	2785	3945	3555	2496	2791	2503	3771	3392	3618	2649	3518	2857	3630	2771	3658	1990	2526	2166	2200	3304	3209	2306	2957	2512	2819	2522	2572	3019	2349	2739	3231	2991	2664	3200	3511	3031	2215	3182	3234	2903
SCGN	-0.805017	9.11909	7.10354	0.0076932	0.302385	17804	14445	26474	36032	20552	5567	13310	16261	9793	12500	9938	37383	8781	25779	25996	5637	25694	13993	27345	8050	3400	14301	6949	4611	16413	34320	5880	53809	22800	7673	17678	13361	31736	28543	1316	18434	35768	15536	8900	17254	15871	28045	29023	30341
LOXL2	0.595329	3.58875	7.09956	0.0077103	0.302385	202	291	408	271	264	67	149	76	84	55	160	160	136	150	250	147	580	339	478	65	37	302	43	208	333	377	253	163	277	141	259	150	197	329	46	59	178	48	208	255	322	264	248	280
FCGR1A	0.650206	-1.72144	7.09418	0.00773348	0.302385	2	1	4	2	11	10	5	2	12	9	3	10	4	1	13	7	2	9	4	2	2	9	5	5	2	2	3	6	15	1	2	5	1	7	2	5	7	1	7	3	5	6	3	5
DLGAP5	-1.33928	-0.799794	7.09186	0.00774346	0.302385	25	2	103	1	1	7	56	0	0	3	3	0	0	17	77	3	8	85	0	0	7	4	14	24	24	4	2	43	73	23	7	8	50	7	34	0	35	13	20	0	8	51	2	38
PLIN2	0.602913	6.29014	7.09061	0.00774891	0.302385	4415	3538	4848	3745	1019	461	2949	689	651	1077	900	850	1453	2137	1439	791	4637	1549	2986	418	863	2116	1272	1580	5090	2398	1393	1206	2603	1142	846	1349	1910	2052	1105	909	1532	1420	1567	1463	6224	1249	1722	3581
HOGA1	-0.644446	1.59702	7.07859	0.00780102	0.303644	158	50	164	18	44	56	141	112	18	34	27	15	69	136	140	126	27	147	52	28	98	46	71	241	137	31	49	19	111	48	38	17	41	16	276	52	94	138	78	53	39	209	56	102
TEX12	0.861947	-1.30117	7.07373	0.00782224	0.303698	10	5	13	26	7	5	15	11	0	9	9	6	9	24	1	3	21	5	11	3	12	1	8	11	12	7	1	5	3	12	8	11	4	9	5	15	12	6	5	1	16	19	19	10
IFIT3	0.606537	6.21839	7.06616	0.00785534	0.30421	2693	8235	2170	1722	3261	1818	1917	1731	638	715	1970	1019	3104	2511	2333	864	3456	744	4096	562	1357	1356	1333	2272	3490	1968	2519	371	1414	1069	1029	2823	939	1390	2718	980	1006	2362	1838	1009	1096	1405	1345	1437
CD83	0.494722	2.66615	7.04966	0.00792804	0.306251	129	254	246	203	215	128	112	133	80	80	149	130	139	59	91	165	317	140	257	45	32	169	68	93	306	186	111	99	289	141	137	365	99	264	75	117	175	157	158	191	269	132	309	147
SEC23B	-0.286511	7.00394	7.04215	0.00796134	0.306749	5511	5738	2768	5042	3547	2792	3075	3059	2348	3148	3785	5308	3065	3910	3208	2181	5286	2645	4756	2099	2233	2737	2729	3065	5844	7819	3235	3182	3098	2867	3062	4138	3806	4355	3422	3610	3064	3428	3260	4848	3563	3817	4933	4210
C1QC	0.667204	2.56107	7.03581	0.00798956	0.306749	50	159	169	128	63	48	101	194	68	55	68	102	147	172	263	239	176	244	75	72	11	88	119	71	160	105	99	195	505	65	171	103	172	131	48	44	204	105	183	63	71	342	76	122
PF4	-0.881149	-0.784633	7.03086	0.0080117	0.306749	40	17	27	4	7	3	18	18	11	12	24	6	10	62	39	6	18	24	50	38	9	5	14	24	49	2	3	10	14	5	19	7	27	35	53	6	11	71	1	9	13	19	6	15
GPM6A	-0.838762	4.80646	7.02798	0.0080246	0.306749	442	736	1056	2129	1169	211	608	420	326	394	420	1451	336	1729	985	364	1421	1161	929	337	94	986	395	283	556	2527	254	2768	1100	301	779	216	714	713	42	1057	1886	728	267	1632	1148	1445	1554	1311
TUBB2B	-0.387636	3.86651	7.0236	0.00804426	0.306749	436	372	210	350	430	260	422	333	282	184	468	503	259	255	445	334	436	319	324	302	505	319	303	210	177	241	286	276	305	245	245	307	187	423	214	273	234	358	278	305	201	283	399	247
CKAP2L	-0.852468	-0.472662	7.01885	0.00806559	0.306749	16	1	62	9	21	11	34	53	42	2	12	6	2	13	73	8	0	70	57	6	20	34	15	19	12	13	20	26	66	8	23	11	8	11	16	12	63	23	31	8	20	67	9	30
ZNF726	-0.560207	0.801841	7.01537	0.0080813	0.306749	39	55	90	48	103	21	94	90	12	62	25	50	48	27	37	24	16	73	27	30	29	41	17	43	54	76	31	70	66	47	56	44	44	79	10	65	67	42	26	21	49	90	331	69
ANKDD1B	-0.533924	0.257355	7.00477	0.00812928	0.307806	27	32	24	82	51	39	18	33	15	54	37	49	45	32	59	13	40	24	40	0	57	43	5	8	28	38	27	57	57	28	18	21	36	28	21	46	60	45	5	22	46	31	73	61
CHODL	-0.749544	0.939039	6.99853	0.00815768	0.308118	8	11	62	55	49	8	27	18	55	55	73	61	40	71	108	10	29	41	112	34	15	29	18	39	24	34	42	219	118	58	12	31	49	74	6	12	79	15	20	60	138	97	228	23
GREM2	-1.08213	0.61002	6.99355	0.00818042	0.308216	16	16	23	43	52	12	31	5	44	10	29	61	12	139	56	0	77	20	192	40	4	26	9	13	18	9	5	35	80	16	22	34	43	14	0	3	39	11	8	9	30	11	59	25
SUCNR1	0.953981	-0.148476	6.97798	0.00825185	0.310144	18	27	34	9	25	0	7	11	8	0	4	0	24	4	1	6	23	1	11	8	1	4	0	7	17	9	1	16	32	3	3	12	7	21	0	5	14	5	13	20	23	5	5	100
COL5A2	0.666252	4.35475	6.9704	0.00828689	0.31047	192	407	638	443	161	142	398	159	158	153	160	157	176	439	1000	197	549	697	356	367	25	359	150	381	416	547	392	500	995	338	344	257	435	370	107	102	477	135	502	313	584	433	389	355
FAH	-0.327085	3.23337	6.96733	0.00830112	0.31047	365	272	360	367	283	237	127	205	121	198	154	319	211	396	489	178	368	274	369	179	177	277	359	153	369	402	134	297	394	144	209	227	280	243	163	264	267	316	203	369	202	472	294	325
FH	-0.323133	5.71155	6.96229	0.00832453	0.310586	1981	1318	833	1843	1802	1067	1146	1045	758	1115	1619	1989	1083	1128	1168	1338	1142	1885	2271	1056	1944	1554	1756	1933	2122	2059	1343	1287	833	423	1007	1613	1059	1192	705	938	841	2082	1811	2338	2207	2511	2143	2017
TFPI2	0.557287	7.38949	6.94484	0.00840612	0.312486	9202	3558	3073	2924	2836	4220	4282	5833	3557	5804	7467	4335	10147	2066	3082	4201	4303	3240	6758	2727	4091	2801	1897	5961	2236	1092	5212	1281	2150	5334	3733	7792	2439	5794	6919	3830	1732	4582	4933	3838	3683	3535	5252	3762
SYT1	0.725429	1.75074	6.94268	0.00841631	0.312486	17	35	46	127	174	9	67	30	61	25	32	171	27	159	144	61	123	33	60	26	8	12	19	25	66	184	14	86	100	25	52	58	104	52	1	135	245	52	184	155	38	98	46	119
RTCA	-0.236755	5.12355	6.93624	0.00844666	0.312854	1239	1034	870	974	915	809	1090	865	838	1052	1205	1453	806	1116	1127	792	1090	1056	1345	899	973	949	853	1121	909	1036	859	1030	1150	819	974	911	965	1126	1042	888	916	994	829	879	995	937	957	1055
MMP12	0.874119	3.52498	6.91936	0.00852674	0.315057	170	94	970	243	36	314	183	137	91	161	755	33	189	426	961	216	183	42	471	256	223	146	28	93	1795	97	630	83	86	190	177	98	118	294	82	333	313	121	58	168	432	161	161	157
ADCY3	0.560725	2.5028	6.91255	0.0085593	0.315498	115	86	82	195	81	52	36	64	62	51	51	62	134	83	103	69	157	180	122	98	28	134	58	61	106	199	72	154	133	80	118	159	94	141	41	58	121	63	148	157	59	110	132	120
NID1	0.597856	4.24716	6.89908	0.00862403	0.31712	183	283	605	535	233	178	503	252	192	151	335	269	296	241	542	290	773	906	376	292	42	610	220	355	201	310	229	689	959	261	507	252	457	291	63	158	614	191	551	405	215	477	402	277
FCGR2B	0.864093	0.519472	6.89134	0.00866141	0.317731	0	35	152	53	8	17	20	76	1	1	3	1	55	34	68	22	34	21	4	23	1	2	21	6	109	37	6	23	129	45	8	14	20	45	20	2	25	32	25	28	43	24	31	62
BMF	0.542464	5.18841	6.87477	0.00874211	0.317909	512	408	549	729	1006	579	640	533	320	382	395	592	440	564	887	524	1080	761	773	324	470	431	548	467	480	314	415	501	669	503	451	342	613	572	542	406	646	607	590	380	196	541	391	605
MFSD14A	-0.245693	5.5865	6.87444	0.00874373	0.317909	1017	869	750	1631	1648	866	1003	959	862	791	1227	1389	999	1046	1065	1026	1237	2117	2400	895	1150	1451	1349	1704	1512	1735	978	1083	993	687	929	1454	1052	1173	844	861	1004	1631	1590	2222	1564	2316	1697	1574
NR0B2	-0.424367	3.93153	6.87368	0.00874743	0.317909	909	904	304	544	497	350	391	344	336	261	515	462	273	680	159	342	336	745	438	263	380	495	453	509	530	905	471	520	617	273	423	545	536	433	674	419	341	347	353	354	202	473	473	495
GMPPA	-0.22987	5.1653	6.87328	0.0087494	0.317909	1181	1460	1050	1365	1168	925	1051	889	836	824	1173	993	890	1244	1360	773	1962	851	1148	596	940	1026	824	761	1088	1375	767	1143	1017	662	685	862	843	948	953	753	679	892	952	1017	927	1141	1113	892
SPRED1	0.2925	3.91598	6.86894	0.00877069	0.317927	328	228	284	297	290	290	329	363	402	370	243	247	517	272	523	233	554	268	417	241	323	230	239	296	217	173	234	299	517	308	274	288	267	364	277	318	233	324	374	376	360	353	377	355
INSYN2B	0.851016	0.561001	6.86419	0.00879401	0.318019	8	59	20	34	41	10	10	3	7	1	29	73	75	15	28	17	222	32	40	22	0	30	55	10	27	119	15	15	62	70	36	58	15	29	9	0	19	0	41	22	23	13	63	17
TMEM42	-0.330439	2.45802	6.8503	0.00886263	0.319744	85	109	120	167	178	132	184	120	106	126	152	135	96	181	149	86	222	114	159	44	99	128	78	124	89	150	70	244	177	50	131	125	129	190	109	150	150	129	144	165	114	156	183	154
SUGCT	-0.512301	0.640879	6.83755	0.00892614	0.321278	27	58	103	33	23	27	79	20	7	25	27	32	36	87	46	13	65	120	42	22	23	47	33	58	54	19	22	50	193	33	30	22	66	32	42	18	65	46	38	24	11	158	39	53
COL4A5	-0.78308	0.0491725	6.81328	0.00904826	0.324311	7	0	23	12	29	15	25	25	15	20	22	11	8	32	55	36	5	34	21	42	50	16	20	10	45	2	10	16	37	6	16	1	20	27	45	13	16	25	3	15	11	24	17	12
C1orf116	-0.296154	5.55439	6.81238	0.0090528	0.324311	2180	2066	927	952	745	892	1225	1063	721	784	1202	1391	770	1286	1024	838	898	760	1245	890	949	714	881	1005	913	1213	1184	1017	1290	720	775	1091	808	1958	1696	1121	835	1711	922	1022	840	935	1209	1280
GFM2	-0.23997	5.33051	6.80086	0.00911142	0.324948	1266	1107	1013	1359	1138	835	1096	1160	659	1155	1172	1448	752	1496	1411	856	1448	1121	1485	623	1163	1027	989	946	1104	1277	787	1276	1294	886	1146	1098	1270	1222	1145	1292	1097	1439	864	1254	1479	1301	1164	1303
RPL39L	-0.479236	0.451508	6.80036	0.00911397	0.324948	58	21	15	31	9	20	36	37	20	35	56	12	12	34	52	24	24	73	50	22	55	31	45	57	22	30	39	50	11	15	25	33	7	38	18	46	34	63	64	32	85	83	41	66
PRKRA	-0.289088	4.97116	6.79637	0.00913433	0.324948	634	440	711	1002	932	576	823	621	439	551	755	831	608	757	1002	711	694	1476	1564	699	1171	846	1227	1403	811	994	531	783	688	329	570	840	638	646	429	564	512	1072	1058	1599	832	1537	971	987
UGT2B15	-0.952029	4.16152	6.78942	0.00916996	0.325459	844	181	425	62	162	265	739	210	52	148	394	82	173	2404	1197	59	93	97	150	323	996	108	289	1481	789	28	1019	78	324	133	63	46	157	389	591	125	391	1053	219	36	242	1131	92	162
HLA-DQA1	0.823993	1.14471	6.75925	0.00932631	0.330242	46	172	28	66	11	11	51	15	2	49	15	57	6	19	152	10	42	2	75	20	21	10	6	28	122	74	41	32	172	34	59	59	18	6	6	9	160	101	50	9	108	53	16	49
RERG	-0.430306	2.90762	6.75246	0.00936183	0.330734	175	290	327	162	150	264	313	362	163	217	168	56	217	292	347	141	194	195	202	201	132	189	129	524	308	161	159	139	174	121	127	199	138	196	419	84	89	405	154	123	293	469	151	170
PRR27	1.34295	-0.695942	6.74203	0.00941674	0.331567	0	7	17	23	19	0	14	1	14	0	3	0	13	7	0	4	37	8	19	23	0	42	0	13	6	22	8	23	4	13	21	37	40	3	0	0	17	0	23	7	9	3	13	23
HSP90B1	-0.26712	9.49899	6.73159	0.00947203	0.331567	19992	18999	20593	26405	22586	14879	18958	18300	11764	17569	18118	24937	19160	24075	22958	14357	27220	14240	24233	10661	15236	14393	13270	17850	23606	26539	15770	14165	20082	14456	14346	17405	16450	19992	17184	15562	14310	21847	18194	26043	35368	25073	23968	23598
GGT5	0.873542	1.34859	6.72952	0.009483	0.331567	20	87	60	83	45	7	30	9	9	16	22	7	24	23	31	16	82	79	54	21	5	43	6	22	24	40	28	43	54	15	39	35	38	30	1	9	27	12	19	30	18	27	37	31
INPP5D	0.771011	0.89911	6.72741	0.00949424	0.331567	6	46	22	34	20	4	26	5	1	13	15	21	9	10	2	14	38	28	17	22	5	22	26	5	30	27	14	21	45	12	31	5	13	20	5	10	33	25	39	42	24	13	21	60
TWIST1	0.656338	-0.327613	6.72316	0.00951686	0.331567	6	21	27	41	21	0	19	12	1	5	14	12	16	13	23	5	39	15	23	7	3	42	0	24	30	35	5	14	37	17	10	28	8	13	1	6	18	10	20	20	13	30	29	39
AQP9	0.738767	0.623457	6.72028	0.00953228	0.331567	38	106	46	62	8	7	51	23	2	0	19	0	31	38	102	3	133	9	42	9	5	31	0	30	109	36	21	15	7	28	52	67	33	17	65	3	27	25	41	34	30	7	39	45
CMC4	-0.299259	2.88093	6.71937	0.00953713	0.331567	173	167	259	255	187	133	212	232	100	134	174	225	204	329	381	158	263	222	260	111	207	145	134	351	300	294	105	256	226	133	145	194	210	174	150	144	259	188	197	234	283	258	219	195
ATP6V1H	-0.234727	5.69752	6.70156	0.00963287	0.332489	1950	2165	1406	1756	1419	738	1542	1258	887	862	1160	1358	938	2034	1542	901	2110	1617	1695	920	1203	1328	1491	1490	2040	1940	976	1688	1771	943	1228	1246	1758	1950	1189	1472	1459	1729	1097	1661	919	1734	1711	2019
COL5A3	1.04574	3.02329	6.69928	0.00964516	0.332489	41	68	106	79	98	20	50	31	27	8	21	33	73	54	78	63	109	92	80	40	2	76	14	36	57	108	52	111	71	66	88	24	73	43	1	12	43	6	72	67	36	55	89	90
LRRTM3	-0.788416	3.7537	6.69906	0.00964636	0.332489	240	317	325	1197	651	106	222	302	198	160	232	1052	145	499	428	105	895	222	890	119	61	362	54	84	335	843	146	501	458	184	319	399	412	446	20	493	884	295	225	1169	399	482	805	756
SERPINF1	0.625105	2.92885	6.69582	0.00966392	0.332489	93	243	134	227	82	332	111	67	169	46	325	97	49	150	186	234	318	243	41	127	72	98	25	108	199	85	350	155	306	196	200	86	56	110	41	143	47	58	400	144	60	266	94	55
ENO2	-0.598913	5.91708	6.69427	0.00967233	0.332489	2238	2165	1590	2298	1416	321	1158	666	875	756	548	1682	512	1479	1173	352	2444	1384	2001	588	402	1391	709	877	2820	5006	378	2333	1812	445	1436	1250	2463	1198	326	1035	1493	919	605	1230	1592	893	1344	1963
CKMT1A	-0.455416	4.19065	6.68414	0.00972742	0.333633	541	693	794	1007	738	233	601	412	281	286	331	787	442	880	406	307	935	423	569	384	230	413	360	236	722	1055	185	1450	936	266	426	368	821	708	202	411	857	517	401	559	265	531	628	935
VPS13D	0.287791	5.58918	6.67283	0.00978937	0.334262	990	1094	791	955	1072	1141	1126	984	959	880	1092	1156	1137	1110	1144	730	1270	1197	1294	881	748	742	938	1061	1107	735	1147	812	941	606	1049	774	824	909	733	807	873	1153	957	912	803	1053	938	1136
ITGB6	0.418474	7.05796	6.67281	0.00978947	0.334262	5538	5182	3820	1513	1770	3803	4476	3042	2179	1751	2855	1903	4107	3992	4670	2655	2085	2240	3520	2161	2543	2137	2888	4801	5820	1763	5546	909	3333	3555	2450	2553	1222	3408	4204	2624	1513	5030	3890	3279	3551	2750	3081	3438
ANGPTL3	-0.808769	0.380354	6.66247	0.00984641	0.335458	12	74	58	88	92	13	48	56	0	24	34	99	18	93	41	1	40	31	35	35	2	13	27	35	50	67	11	64	33	24	21	30	86	23	46	25	89	32	15	17	74	28	57	60
SASH1	0.248803	4.27627	6.65515	0.00988697	0.336091	418	506	608	766	609	359	439	352	287	358	474	503	453	427	501	360	836	545	459	330	418	446	367	575	451	346	469	503	485	336	462	574	554	532	488	503	445	430	604	827	409	629	805	597
HSD17B4	-0.175513	6.29955	6.62736	0.0100424	0.340618	2350	2395	2276	2311	1999	1215	2382	1693	1132	1473	2058	2224	1472	2870	2448	1393	2338	1804	2540	1233	2016	1564	1787	2601	3161	2366	1543	2151	2279	1230	1534	1396	1827	2043	2211	1600	2019	2632	1795	2028	1807	2853	1969	2567
GABARAPL2	-0.371711	6.56138	6.60738	0.0101557	0.342227	2513	3405	2285	4562	3163	1286	1883	1842	1394	1403	1763	2851	1489	2178	2564	2022	3223	3724	5733	2074	2338	2924	2411	2766	4104	5685	1360	2661	2428	913	1566	2169	2283	2480	1096	1767	2759	2687	3082	5011	4203	4379	3407	4711
TRIQK	-0.321768	5.65058	6.60309	0.0101802	0.342227	1249	1301	1473	2130	1586	818	1458	1534	996	1209	1041	1820	892	2145	2569	962	2051	1179	1771	886	740	1094	1171	1471	1610	2115	625	2313	1742	811	1071	963	1586	1558	1223	1499	2014	1797	1075	1417	1765	1741	2084	2251
GLI1	0.954715	-1.41303	6.59889	0.0102042	0.342227	0	1	0	6	3	1	1	3	1	0	0	2	6	0	0	0	21	12	6	0	5	13	2	3	14	2	0	29	11	6	26	9	5	2	1	3	4	2	15	21	0	14	13	0
PLEK	0.579499	1.54998	6.59878	0.0102049	0.342227	30	78	78	101	45	64	52	74	16	20	83	9	74	41	135	146	100	27	137	39	12	90	16	63	204	105	29	68	187	62	77	135	55	90	16	58	116	39	115	62	104	123	96	29
KRT6A	-1.10391	-1.03616	6.59473	0.0102281	0.342227	20	110	13	0	4	4	13	2	4	1	5	2	0	1	6	6	10	4	5	2	26	1	7	4	20	0	2	0	2	9	5	1	4	27	4	20	1	13	4	2	1	5	1	2
PITPNC1	0.238985	5.29888	6.59107	0.0102492	0.342227	645	631	757	1377	1494	820	990	856	739	707	953	1164	793	935	1059	585	1290	719	1480	489	587	683	438	751	664	726	667	725	965	640	865	1069	835	789	669	1097	817	835	850	1085	1106	954	1087	1044
CLMP	0.467716	2.45522	6.5894	0.0102588	0.342227	44	144	125	260	103	50	151	90	69	58	155	136	77	86	119	73	371	175	246	55	49	183	44	100	89	161	100	96	214	161	188	185	86	169	48	138	86	139	211	212	147	75	198	105
LIPG	0.375424	3.7814	6.58766	0.0102688	0.342227	416	491	277	354	471	373	277	310	199	219	379	362	301	190	293	319	547	256	613	187	162	311	164	317	323	316	351	273	453	309	467	263	362	482	223	354	221	276	546	384	331	335	466	260
NAALAD2	-0.773349	1.06088	6.5741	0.0103473	0.344093	36	35	44	83	43	7	25	52	22	26	25	550	11	188	50	10	13	28	33	43	12	205	16	40	12	59	15	122	102	25	25	42	131	57	22	56	53	21	13	65	76	120	32	86
FBN1	0.607023	4.50767	6.56667	0.0103906	0.344489	212	469	638	688	299	228	532	229	427	296	283	353	455	338	453	343	1215	1164	665	432	58	627	259	368	243	496	297	811	1214	651	492	335	557	485	98	280	577	202	801	676	513	627	753	441
KHK	-0.441181	1.03334	6.56434	0.0104042	0.344489	44	154	134	66	50	14	67	46	14	34	20	30	74	90	39	40	114	39	43	36	58	42	34	55	64	63	21	43	51	29	39	30	68	43	91	11	36	89	40	35	28	64	28	82
AGR2	-0.750334	4.4959	6.55318	0.0104697	0.345648	1330	1192	465	68	325	575	1633	574	132	370	333	393	628	1772	461	504	94	338	600	607	586	239	3300	1809	1232	55	239	54	349	208	184	206	443	2839	655	891	102	2671	536	90	650	566	394	815
KCNJ16	-0.552039	4.08477	6.54797	0.0105004	0.345648	516	233	583	797	440	321	489	567	197	216	143	718	273	958	972	230	373	429	269	183	402	179	341	757	336	304	176	394	332	84	133	144	155	343	438	169	293	560	276	148	197	1040	287	296
MLXIP	0.248235	7.30912	6.54684	0.010507	0.345648	4180	3720	3534	4063	4719	4790	4336	3165	3939	3233	4652	4522	3962	2913	4484	4203	4123	3688	4922	3084	2984	3011	3273	3087	3306	2851	4390	3031	3584	3064	3300	2970	2704	3130	3294	3061	2894	2978	4316	3391	2307	3144	3651	3716
FGF2	0.484292	5.06436	6.54025	0.010546	0.346186	993	719	294	841	576	877	663	1126	835	1213	962	656	906	263	219	671	2471	619	1439	583	652	487	570	519	342	401	926	297	580	1095	913	1683	377	2011	770	1284	250	658	748	1080	770	334	1369	632
CKMT1B	-0.432686	4.25091	6.52718	0.0106238	0.347494	590	761	737	1060	758	244	580	402	285	312	317	848	458	887	470	291	1006	413	551	372	240	432	341	229	697	1064	216	1609	980	295	456	369	787	732	210	429	827	504	388	563	282	538	632	949
C1orf74	-0.34098	2.69905	6.52593	0.0106313	0.347494	192	176	219	273	232	76	154	195	191	188	149	220	228	198	135	161	329	134	254	65	121	150	55	106	103	315	123	356	259	195	158	182	171	194	92	150	189	130	215	205	108	142	342	277
MGAT4A	-0.221918	6.03339	6.51689	0.0106855	0.348399	1592	1502	1496	2587	1887	845	1560	1377	1041	1674	1488	1882	1239	2291	2384	1147	2158	1514	1919	1098	1438	1184	1103	1449	1674	1842	1154	1718	1827	1092	1220	1193	1509	1888	1272	1612	1581	1694	1330	1628	1543	1870	1560	2365
BCAS4	-0.458683	1.8965	6.51166	0.010717	0.348399	93	82	89	195	116	20	65	80	25	67	36	61	83	112	119	51	166	178	143	37	41	82	71	74	136	236	37	146	96	22	40	117	187	67	27	83	175	88	70	119	83	108	101	157
ERLEC1	-0.260158	6.60174	6.50994	0.0107273	0.348399	2447	2403	2390	4904	4014	1491	2227	2445	1685	1967	2211	4329	1975	3806	2841	1801	4785	2176	3203	1661	1587	2383	2303	2076	2859	3821	1666	3966	2299	1534	2321	2182	2820	3314	1327	2152	2499	2975	2205	3574	2592	3307	3389	4131
HACD3	-0.305254	7.25215	6.50205	0.010775	0.349206	4414	3941	4779	5831	4622	2400	4069	4294	2108	3491	3041	4712	2679	5886	3753	2193	5467	4144	5370	2302	3058	3707	3852	3961	6753	7211	3237	6745	5640	3174	4175	3542	5443	5235	3676	3875	5448	5679	3694	4916	3200	5413	4990	7442
SVOP	-0.733286	3.75312	6.4806	0.0109058	0.352698	420	648	270	680	391	81	113	263	136	221	202	583	169	171	213	96	346	333	461	187	57	193	116	75	405	1566	161	682	473	94	247	232	412	471	14	446	474	329	185	341	236	411	455	554
AMTN	1.08691	-1.02508	6.45721	0.0110503	0.356617	5	9	35	14	2	5	2	10	8	0	8	3	5	15	8	5	0	1	11	0	0	11	19	1	14	12	14	5	89	4	11	11	15	1	9	0	4	0	25	4	27	23	0	4
ADGRA2	0.536115	2.30363	6.44949	0.0110984	0.357416	61	80	82	117	79	46	55	55	27	47	69	105	43	82	65	77	141	88	102	61	49	79	33	48	103	143	72	149	173	66	105	89	101	124	46	63	101	57	69	103	90	86	125	77
RASGEF1B	-0.551999	4.95161	6.41689	0.011304	0.362519	1124	776	899	1615	1143	358	668	948	455	604	507	1490	590	1131	1143	334	1618	1782	2014	965	659	731	508	716	964	2226	434	997	936	378	564	1215	1284	973	450	919	1797	935	676	1073	961	1221	1442	1703
OMA1	-0.366321	4.20348	6.41685	0.0113043	0.362519	499	550	527	701	428	410	762	583	338	530	610	296	530	683	808	403	616	626	527	271	303	490	517	658	592	439	497	843	722	257	397	279	623	540	685	465	632	585	456	385	808	793	554	712
PARS2	-0.340581	2.65757	6.41021	0.0113466	0.362905	352	389	134	212	141	110	212	198	54	180	248	83	207	191	121	161	206	110	156	48	151	159	121	178	307	338	191	188	201	137	103	236	136	217	164	157	152	188	161	234	106	159	196	214
SLC17A5	-0.235666	5.38539	6.40753	0.0113638	0.362905	1349	1043	1211	1571	1144	691	1106	915	734	837	887	1193	645	1428	1035	657	1431	1312	1172	812	849	1044	1001	969	1373	1687	638	1807	1797	675	901	807	1492	1383	1121	957	1281	1074	878	1023	1240	1214	1272	1643
CDC45	-0.789196	-0.45781	6.39847	0.0114219	0.363459	28	34	76	27	25	0	24	23	0	18	6	17	11	4	32	7	32	36	20	28	15	13	0	12	12	74	26	39	26	26	21	20	20	23	17	13	42	33	12	19	52	43	26	38
PTPRC	0.598643	2.00166	6.39742	0.0114286	0.363459	31	39	82	104	42	35	65	65	3	93	47	27	77	84	182	158	81	121	188	61	21	71	58	49	264	86	66	82	193	59	138	145	67	169	70	72	114	127	167	103	193	186	144	53
ADAMTS12	0.56991	3.76397	6.38619	0.0115012	0.364365	190	493	532	558	269	83	319	156	152	129	144	191	325	266	371	185	1268	677	402	189	33	383	80	242	385	508	188	444	533	277	312	225	298	232	58	104	377	157	437	300	200	315	443	463
SLC27A2	-0.436722	1.23871	6.38563	0.0115048	0.364365	23	27	55	92	107	56	58	94	89	57	35	77	89	73	116	54	122	50	49	50	23	37	19	45	26	34	25	82	47	27	57	49	25	45	23	48	66	43	54	37	54	33	24	51
MTX2	-0.207967	4.77964	6.37302	0.0115868	0.365616	793	777	774	952	833	641	894	741	529	772	870	803	710	1114	902	627	978	781	848	320	719	736	825	716	782	784	720	615	869	626	724	797	759	704	677	644	585	786	746	781	754	804	906	983
AFAP1L1	0.628268	1.11862	6.37079	0.0116014	0.365616	7	34	57	75	59	18	38	16	21	6	16	34	27	17	95	30	101	98	95	6	1	40	3	17	14	45	59	85	41	38	88	41	43	72	17	16	28	12	21	96	104	29	55	23
TINF2	0.146846	4.96901	6.36856	0.011616	0.365616	953	885	706	858	814	819	750	766	637	658	902	916	759	777	731	735	876	710	895	424	489	614	618	591	673	758	702	599	716	708	683	747	645	841	545	734	613	837	793	835	760	785	863	732
GLCE	-0.191055	4.88144	6.36343	0.0116496	0.365922	914	850	687	1062	1117	622	717	624	495	541	706	1236	684	1163	999	547	1110	695	897	323	710	664	679	952	944	870	595	554	844	535	660	639	740	749	814	772	888	1014	673	927	589	782	811	959
CCL7	0.95772	2.71627	6.35552	0.0117017	0.366805	117	228	47	102	137	178	39	472	243	303	131	433	220	75	66	156	710	22	242	31	97	59	23	133	91	57	118	43	33	353	309	290	53	164	217	69	31	66	431	74	90	94	28	134
FOLR1	-0.624848	1.54248	6.34513	0.0117704	0.368204	110	203	131	11	27	84	205	118	65	46	56	49	90	138	201	52	20	100	32	77	63	34	77	104	38	53	41	16	50	44	58	17	69	322	74	148	61	298	59	25	51	124	61	67
MUCL3	1.24326	1.87393	6.34069	0.0117999	0.368216	120	639	6	34	20	78	137	10	138	49	144	45	38	1	1	5	2	4	33	0	6	5	18	14	15	0	8	3	51	0	44	15	37	340	6	119	271	181	349	16	0	35	55	5
CHD5	0.959198	1.84352	6.32976	0.0118728	0.368216	6	24	37	60	62	11	10	21	2	25	9	22	13	25	21	16	46	69	39	81	5	29	10	26	15	24	22	77	60	19	18	44	54	28	7	10	41	8	37	72	27	22	28	71
LRRC25	0.86587	-1.18874	6.32674	0.0118931	0.368216	11	3	17	6	16	0	0	4	0	4	3	5	5	1	0	8	25	3	5	2	1	3	0	3	32	21	6	1	18	3	13	7	4	6	0	0	10	0	2	3	1	7	1	9
CACYBP	-0.330402	6.20617	6.32557	0.0119009	0.368216	2419	1738	2162	2593	2276	1950	2895	1860	1654	2215	2418	2478	1738	2726	2584	1496	2646	1873	3578	1584	2047	2154	2044	2076	2172	2326	1722	2237	2338	1293	1760	2054	2159	2330	1952	2363	2003	2967	1965	2792	2274	2972	2669	2732
CCDC51	-0.291703	3.3924	6.32258	0.011921	0.368216	519	454	355	303	286	228	300	295	219	266	271	251	315	327	248	241	491	269	434	184	349	260	182	265	362	381	282	356	361	212	310	268	295	381	367	258	339	348	246	344	225	400	311	298
GBE1	-0.259973	5.36998	6.3214	0.0119289	0.368216	1373	1030	1078	861	853	749	1067	901	751	840	1022	1139	845	1391	1266	626	1346	800	1360	706	1232	791	659	1934	1511	1093	735	827	1108	644	734	943	1001	1197	1039	1003	831	1411	891	1140	1546	1208	1074	1260
NLRC5	0.370039	4.28569	6.31673	0.0119604	0.368216	619	756	345	410	541	360	357	430	251	298	548	312	253	329	230	389	510	520	633	229	492	381	395	243	456	438	341	221	526	339	327	444	461	521	454	417	257	440	336	260	214	229	302	292
EVA1A	0.326982	3.63617	6.31113	0.0119982	0.368216	223	361	369	415	481	136	290	238	171	197	218	255	276	213	261	165	551	232	415	169	169	364	192	274	292	283	231	191	439	178	249	413	531	187	153	208	269	185	323	489	403	296	499	596
COL5A1	0.88602	4.20633	6.31079	0.0120005	0.368216	113	156	457	197	112	90	215	72	91	41	147	100	86	305	459	113	214	584	251	177	21	279	170	137	99	138	108	333	616	146	184	89	240	154	48	46	227	68	195	191	164	311	255	232
RASAL3	0.839506	-1.34043	6.30917	0.0120115	0.368216	4	0	9	11	9	0	4	5	9	0	3	7	1	8	11	3	5	5	14	3	0	3	0	0	8	9	4	9	6	6	2	4	0	7	3	1	7	0	10	2	2	3	1	6
TGFBRAP1	0.162666	4.65999	6.28089	0.0122047	0.373389	591	487	670	821	765	434	630	471	507	532	446	904	569	765	652	346	703	723	603	418	557	551	511	572	563	586	451	629	758	428	615	605	647	648	568	574	780	709	520	614	296	615	674	824
TMEM92	-0.636122	1.65337	6.27209	0.0122654	0.3745	277	273	134	15	25	50	127	46	25	39	110	39	43	220	178	57	22	66	148	79	93	45	124	149	333	45	86	24	197	33	48	30	110	176	129	59	37	206	78	30	88	69	21	26
NNMT	0.56349	6.46833	6.26466	0.012317	0.375324	3830	8237	2983	2257	2944	1050	4297	1684	645	310	1969	506	2454	2729	7512	1653	3302	447	1302	955	1515	2118	2375	1386	7606	2687	1271	863	3403	1125	1006	874	1467	1070	3045	834	1450	1908	3788	1308	1786	2348	1627	2764
CXCR6	0.793016	-0.991411	6.25708	0.0123698	0.375771	21	36	15	13	7	12	0	12	0	8	7	0	0	0	0	11	18	16	14	4	0	5	0	2	29	18	6	20	15	16	2	5	8	9	12	8	9	33	3	3	15	4	23	10
PIGH	-0.331171	3.89749	6.25522	0.0123828	0.375771	356	240	331	498	418	474	452	279	252	420	525	536	405	389	552	369	483	649	1097	426	277	374	510	689	689	355	423	267	260	173	253	513	265	351	206	277	242	283	722	686	345	688	493	229
LGALS2	-0.862595	6.80468	6.24533	0.0124521	0.375771	4998	2970	8959	733	2822	2424	12111	3406	1438	2097	7855	1110	3358	12563	13380	1851	1811	1626	2621	2179	12154	2090	2594	5920	6991	644	4865	486	6534	1240	745	1041	1224	1790	15654	936	2206	4484	1581	708	2909	10099	809	631
PAX5	0.848166	-0.416058	6.24286	0.0124695	0.375771	6	10	0	25	11	0	12	1	11	6	38	20	16	4	2	3	125	3	6	8	0	7	13	0	7	16	1	31	2	2	6	21	15	8	0	26	8	60	19	10	6	24	14	27
RSRP1	-0.299194	5.1194	6.24266	0.0124709	0.375771	400	654	1091	1206	1318	559	856	904	536	756	556	633	471	1219	725	568	1267	941	963	608	654	864	713	1010	647	1045	946	1288	1334	546	752	992	1073	1113	568	558	1031	664	752	969	740	731	680	1323
NT5E	0.542171	1.98474	6.24151	0.012479	0.375771	104	66	42	163	72	30	61	18	26	29	66	88	132	39	43	83	269	67	223	17	23	137	35	39	41	60	41	52	115	65	89	138	72	43	12	45	29	89	47	81	163	100	167	67
CDRT4	-0.296578	2.77005	6.2302	0.0125589	0.377434	210	175	141	228	244	96	153	247	62	144	139	234	121	239	204	103	255	158	212	85	122	107	146	175	207	505	149	247	236	127	165	138	139	254	177	186	198	227	159	251	142	201	168	295
ZCCHC24	0.430062	2.2541	6.22239	0.0126144	0.378359	72	70	82	124	88	94	124	47	64	68	111	88	116	94	118	165	237	204	115	59	68	95	61	43	100	117	56	105	207	88	84	62	45	154	66	59	100	38	118	95	97	133	162	84
TF	-0.885431	0.557072	6.21252	0.012685	0.37973	5	43	44	24	21	7	14	7	21	0	46	27	26	178	332	30	11	37	14	13	15	8	0	58	127	23	16	35	18	5	19	13	26	24	46	3	4	3	10	43	96	21	19	9
ABHD10	-0.419202	5.61272	6.20672	0.0127267	0.380171	1520	1328	1813	2720	2289	829	1322	1457	1000	1207	1190	2487	1086	1861	1475	871	3664	1325	1777	710	773	1105	855	1070	1575	2255	785	2375	1367	1105	1216	1387	1564	1712	806	1304	1758	1298	1040	1969	1463	1533	1908	2481
SGK2	-0.345032	3.79976	6.20241	0.0127577	0.380171	596	547	600	647	406	327	484	359	246	279	409	369	338	836	463	264	453	324	549	221	326	231	443	610	589	489	394	549	534	249	173	201	391	302	518	223	381	477	228	182	258	609	399	470
AGBL3	-0.305452	2.36614	6.19988	0.0127759	0.380171	104	143	150	242	257	129	124	177	81	115	129	139	72	139	112	107	253	210	222	63	88	115	134	161	115	163	94	183	221	70	134	205	101	113	93	95	187	93	104	134	109	119	159	199
DAPL1	-0.66891	2.05403	6.19667	0.0127991	0.380171	92	111	231	228	369	28	121	158	82	85	95	254	48	108	307	43	279	79	116	44	38	85	64	76	91	202	21	304	122	55	129	122	172	235	57	167	170	110	61	189	210	219	145	230
SLC24A3	0.537506	0.967257	6.1896	0.0128504	0.380953	16	50	57	37	43	35	27	31	16	14	17	16	27	28	34	15	113	79	39	21	3	49	43	26	32	57	30	50	101	54	45	49	45	26	1	22	21	15	61	66	61	36	77	89
MARS2	-0.283914	2.90045	6.17236	0.0129761	0.383938	393	362	125	246	167	160	214	232	135	238	263	273	228	324	224	147	300	202	166	127	145	131	136	210	207	306	222	113	160	186	174	291	124	189	181	199	201	187	321	228	92	200	325	269
ALDH9A1	-0.29996	6.30393	6.16822	0.0130065	0.384094	1604	2557	2415	2849	1959	1224	1835	1909	1207	1558	1718	2625	1785	2919	2176	1519	2940	1911	2981	1173	1156	2026	1797	1839	3846	5007	1526	3116	2013	1337	2318	2246	2981	2526	1281	1774	2862	2958	2021	2871	1898	2989	2983	3626
DACT3	0.864674	-0.578461	6.1558	0.0130982	0.385929	1	30	15	12	3	4	6	3	17	6	4	4	0	1	17	9	19	25	19	4	0	26	5	9	1	5	3	13	48	4	5	3	18	11	0	4	30	0	4	17	10	11	22	30
SLC24A2	1.04298	2.03177	6.15298	0.0131191	0.385929	88	110	26	159	111	2	21	66	19	12	21	94	22	2	39	27	898	153	10	31	9	39	10	42	218	206	0	9	1	5	119	22	108	35	0	172	215	83	120	25	104	68	5	746
TMEM182	-0.330273	2.37704	6.14804	0.0131558	0.386264	162	127	175	163	106	108	223	148	132	139	169	161	151	300	187	77	247	101	215	78	112	111	72	186	161	234	75	173	133	123	149	124	128	147	106	120	124	170	138	144	147	138	263	189
MAP2K6	-0.413012	2.94686	6.13528	0.0132511	0.387703	180	156	253	320	250	97	270	203	101	186	161	513	151	190	352	106	293	125	195	44	172	86	100	224	225	327	107	385	197	83	167	129	213	237	171	142	225	316	160	191	287	481	182	333
HAPLN4	-0.93266	2.59038	6.13469	0.0132554	0.387703	46	37	108	244	120	41	25	61	83	19	49	476	27	139	107	47	187	51	155	23	0	61	36	18	30	146	17	150	145	48	69	59	94	191	3	95	96	230	64	100	73	113	129	121
CMTR2	-0.189694	4.44456	6.12903	0.013298	0.388206	420	388	508	663	686	406	478	515	394	558	530	588	500	733	707	352	664	455	685	410	447	462	322	515	457	564	382	564	657	286	460	453	395	657	451	529	553	682	573	683	683	707	707	742
SV2B	0.479472	2.62823	6.11218	0.0134253	0.390542	86	17	174	192	70	111	132	140	72	66	208	87	171	138	266	124	73	50	216	54	182	73	86	220	255	122	74	77	109	66	127	33	94	115	198	199	225	165	163	58	72	113	37	65
SHC3	0.455334	2.14743	6.10967	0.0134444	0.390542	77	111	40	74	38	42	94	82	66	66	64	69	125	129	39	252	116	101	45	58	104	96	229	97	37	46	53	56	108	64	95	59	68	67	65	92	51	119	93	124	29	77	48	87
PREPL	-0.25284	6.46672	6.10833	0.0134547	0.390542	1906	2601	2657	3347	2942	1619	2142	2309	1327	1658	1052	2805	1869	2905	2670	1206	3726	1617	2849	1231	1214	1817	1707	2206	2416	4170	1660	2890	2342	1371	1833	1624	2179	2137	1699	2207	2697	2834	1778	2769	2493	3247	2894	4292
AMHR2	-0.720561	1.67108	6.09791	0.0135342	0.392107	166	120	157	33	20	85	372	102	51	43	103	45	68	260	218	59	27	114	51	59	199	67	128	180	180	14	41	11	223	37	29	47	59	46	285	51	85	137	132	28	39	142	39	33
MED13L	0.238669	5.59195	6.09382	0.0135655	0.392272	1024	779	1100	1290	1140	1038	1268	1063	1232	957	1036	1381	1073	1187	1444	900	1452	968	1324	593	868	587	620	1096	1021	653	811	852	1215	897	1044	937	910	1129	1088	1011	1041	1326	1063	1081	712	1156	958	1165
PGK1	-0.367519	8.91943	6.08881	0.0136041	0.392644	15643	12206	20089	11526	10211	9651	22277	10915	7924	10717	12254	11908	10504	24805	27175	8002	13438	9261	16551	6855	14298	9641	9219	38568	28416	11270	9047	9871	13513	10262	9037	10459	12492	12083	19840	12205	10129	18010	10390	11399	35681	14911	13466	13147
PYCR1	-0.349349	3.77166	6.08491	0.0136341	0.392771	638	633	194	148	408	339	343	230	209	274	536	391	360	370	326	418	282	321	325	203	382	243	270	327	652	439	362	175	300	273	276	240	262	272	437	208	143	366	214	244	202	341	234	205
TMCO3	-0.237432	6.3113	6.08099	0.0136644	0.392904	1858	1947	2430	2518	1815	1077	2156	1493	1566	1340	1522	2702	1474	3017	2298	1169	2133	1274	2164	1463	1577	1527	1273	1928	1280	2954	1089	1834	2698	1000	1495	1777	2709	1813	1564	1648	2283	2149	1936	2444	2071	2431	2890	2902
IL22RA1	0.699069	3.42402	6.06283	0.0138056	0.395784	511	848	40	89	299	426	98	229	215	331	251	177	477	58	78	589	44	199	105	139	68	83	153	90	265	286	203	65	66	318	769	197	74	163	65	176	25	151	428	110	198	229	119	39
ATCAY	0.709721	1.13135	6.06146	0.0138163	0.395784	41	85	76	63	76	10	53	22	7	33	12	42	65	47	48	14	106	33	58	46	8	20	5	5	88	93	22	76	75	15	21	9	53	12	0	20	88	14	70	36	63	63	34	111
BBS2	-0.228955	4.85489	6.05657	0.0138547	0.39614	618	891	573	1305	866	410	613	746	319	643	476	970	498	1137	879	529	650	846	995	411	571	704	621	832	1025	1324	529	1217	969	439	785	436	1078	1006	501	754	826	897	619	946	598	726	727	1322
OSCAR	0.926755	-1.77891	6.03877	0.013995	0.398812	1	1	8	1	5	0	0	2	0	0	1	1	0	9	8	1	4	9	5	8	4	0	2	2	3	0	1	4	2	7	3	0	0	1	2	0	1	1	2	11	4	2	7	3
STON1	0.513277	1.10155	6.03811	0.0140002	0.398812	19	75	54	89	41	18	22	3	35	7	17	27	28	26	110	30	126	50	49	7	4	19	28	29	99	94	24	53	66	48	64	15	51	41	13	41	74	27	43	22	20	47	22	37
TMT1B	-0.571374	1.96432	6.03321	0.0140392	0.399177	162	201	167	44	121	151	263	171	76	76	121	116	116	223	202	112	33	87	61	98	114	96	202	176	243	34	135	28	166	92	57	74	54	155	192	75	80	292	94	51	106	189	80	108
TMCC3	-0.480248	3.83587	6.02652	0.0140925	0.399242	224	204	454	603	375	103	190	277	203	293	204	851	161	381	273	174	602	344	483	368	193	263	245	125	233	434	150	833	544	183	224	429	372	488	34	410	476	331	289	384	250	307	607	431
TAFA2	-0.53921	0.213102	6.02118	0.0141352	0.399242	21	18	16	77	15	19	29	17	1	20	33	45	5	17	55	21	53	57	20	27	49	12	55	11	22	44	10	81	32	31	46	23	30	53	12	42	32	43	43	29	62	68	37	67
CYP3A4	0.641891	1.34021	6.02076	0.0141385	0.399242	103	67	34	35	37	67	99	47	16	112	86	42	44	81	58	33	57	48	75	20	62	42	42	72	26	35	296	14	93	34	33	91	22	52	68	27	24	51	62	13	50	33	39	30
ERMN	-0.883839	1.08592	6.01643	0.0141733	0.399242	26	3	65	32	30	14	28	25	14	44	31	249	0	29	63	1	44	38	34	2	8	110	18	9	34	213	9	78	27	20	28	49	44	145	7	140	73	76	21	154	40	71	108	170
TMED2	-0.221689	7.8955	6.01408	0.0141922	0.399242	5951	4141	5521	5922	6359	5543	7207	6251	4602	5997	6345	7884	5067	7849	8200	4592	7721	7970	11451	6318	7404	5334	6725	7978	5219	5309	4621	3781	5377	3687	4020	5282	3926	5616	5612	5419	4760	7062	6796	9368	8088	9385	6606	5995
MAFA	-1.29753	3.99492	6.00663	0.0142522	0.399242	56	63	52	191	155	28	53	51	48	114	52	347	42	163	100	72	92	65	124	55	16	62	50	17	25	220	19	211	158	42	50	44	77	141	2	104	119	145	26	114	35	89	98	170
TGM2	0.448802	7.34689	6.00354	0.0142772	0.399242	5643	6261	2597	2558	3325	1872	4852	1972	1570	969	2909	2532	3613	3552	3398	1543	4410	3506	6528	1253	3488	3767	1484	5064	4808	2750	4401	1122	3199	2052	2203	4052	2894	2022	3931	2140	2166	2625	2972	2716	3694	2072	5405	2726
NSF	-0.295314	6.69316	6.00311	0.0142807	0.399242	2707	3268	2775	4618	3241	1836	2373	2486	1827	1878	2241	4847	2782	3560	3324	1670	3790	1913	4427	1646	1732	2156	1939	3209	4463	5697	2243	3795	2992	1919	2773	2754	2985	2772	2741	3312	3687	3578	3021	4299	2992	4180	4325	4299
SLC36A1	0.308983	3.25155	5.99855	0.0143177	0.399242	353	211	138	211	278	230	171	207	221	178	145	214	136	156	162	230	334	186	191	163	161	203	141	144	250	186	160	264	276	122	203	111	142	292	157	156	193	159	223	242	106	227	285	144
SLC25A11	-0.208937	4.54049	5.99786	0.0143233	0.399242	792	762	644	728	838	447	580	566	246	503	509	532	449	889	512	421	862	619	571	415	401	396	556	482	722	958	448	851	884	313	485	490	638	626	443	386	571	698	466	520	345	672	658	740
SKIC3	-0.216084	6.73161	5.9972	0.0143286	0.399242	2694	3522	2605	4722	2932	1787	2786	2816	2272	2489	2095	3358	2162	3694	3390	1904	3361	2927	3010	1661	1532	2183	2001	2270	3651	5171	1846	3649	3566	1893	2427	2461	3519	2723	2220	2561	3153	2536	2645	3764	3727	3361	3491	4378
HSD17B12	-0.293981	6.79274	5.98939	0.0143922	0.400286	3424	2833	2868	4133	3170	3191	2483	3478	3068	2120	3885	5580	3652	3213	5020	1999	5036	2906	4211	2443	2431	2780	2358	3329	3958	4682	2392	2907	2386	2203	3563	2604	3011	4319	2156	2644	3597	2987	2308	4252	3661	2897	3128	2552
COL4A1	0.464707	6.1202	5.98194	0.0144531	0.40125	920	1111	1603	1395	1004	882	1535	1074	1048	960	886	1173	958	852	1801	1334	1888	2432	1622	1150	620	1635	1243	730	506	928	1478	1864	1792	1143	1480	1069	997	1638	452	1187	1104	1008	1611	1831	1025	1679	1356	1295
KRT19	-0.449759	7.97955	5.97569	0.0145044	0.401946	8374	4240	6781	1521	2307	6928	13302	8763	4815	8213	9813	3949	6864	4610	6871	5360	2876	8745	7363	5852	10422	4113	8302	9461	1887	565	5878	2557	5212	4460	4758	4955	4103	10304	10672	9205	3663	16268	5754	4910	6582	9711	7416	4888
KRT40	-0.909223	1.02302	5.97079	0.0145448	0.402335	53	95	32	466	31	20	4	51	31	7	37	98	14	11	40	9	348	22	136	7	5	58	22	0	54	93	37	9	37	63	76	22	76	96	13	156	63	92	23	7	27	1	95	41
F2RL3	0.704709	2.1234	5.94619	0.0147491	0.406457	56	87	63	201	327	48	43	45	31	9	53	107	27	49	70	62	140	142	136	36	2	73	13	24	81	181	202	128	95	82	130	118	73	97	9	42	90	32	111	104	85	70	94	54
WBP1L	0.20188	5.54225	5.9455	0.0147549	0.406457	1345	1227	1080	1131	1035	1383	1328	1155	1089	966	1179	1034	1279	1064	1503	1077	1878	1164	1606	750	1177	934	1235	1193	1066	867	1328	886	1328	936	1145	1056	808	1253	1299	1264	825	1259	1272	1239	907	1445	1194	1292
SNX3	-0.152877	6.33085	5.94328	0.0147735	0.406457	1959	1710	2409	2460	2183	1657	2637	1921	1678	1812	2395	2173	1830	2762	2920	1646	2758	1690	2580	1187	1626	1803	1536	2250	2214	1876	1564	1870	2780	1499	1494	1564	2003	2004	2384	1821	2014	2093	1980	2127	2411	2562	2350	2294
HTR1D	-1.1617	-1.18823	5.93567	0.0148374	0.407448	32	22	4	3	6	20	20	18	14	11	6	1	12	0	19	0	0	9	0	16	1	0	0	14	2	3	0	0	7	2	3	11	12	75	4	21	8	71	6	3	1	4	10	1
COPB1	-0.287107	8.08577	5.93242	0.0148648	0.407448	8041	9325	7048	9378	6973	7075	9244	8619	6117	6752	7936	9661	6986	9736	9693	5864	9273	6643	9340	4458	6197	6046	7307	8462	10565	10253	5823	7849	8727	6803	6243	7130	8105	8189	8493	8044	7856	9872	8133	9655	10744	9296	10573	9592
HIPK3	0.155252	6.6177	5.92951	0.0148894	0.407448	2289	1834	2716	4104	3057	2438	2450	2785	2033	2279	2034	2889	2379	2837	3095	1853	4472	1762	3556	1750	1816	1708	1601	2418	2245	1571	1553	2195	2399	1542	1893	2195	1822	2172	1902	2456	2183	2623	2591	2714	2540	2575	2785	3129
CRELD1	-0.479436	4.01606	5.91763	0.0149901	0.408691	408	532	355	416	459	97	199	247	144	176	180	428	208	335	296	197	562	342	493	217	151	360	225	183	548	743	203	581	411	210	185	262	388	488	210	174	302	434	252	447	266	295	385	408
HSPA4	-0.207987	6.33842	5.91752	0.014991	0.408691	1931	1099	1418	2386	2032	1474	1869	1535	1095	1478	1933	2117	1385	1747	1696	1441	1771	2313	3412	1778	2260	1929	2209	2371	2338	2613	1600	1923	2066	1316	1160	2637	1710	1949	1787	1923	1586	2854	2503	3262	1827	2933	2501	2211
FECH	-0.236836	4.65407	5.91471	0.015015	0.408691	899	707	928	776	683	430	859	722	535	689	679	580	519	1054	814	485	1018	594	828	511	692	566	584	920	930	726	520	755	1040	577	479	626	656	631	762	759	671	831	749	887	488	1043	903	906
TMED6	-0.743178	5.79544	5.90997	0.0150554	0.409064	1692	2155	1258	3426	4103	1050	787	4192	1036	1489	2382	4040	1927	1750	6845	1458	6148	1763	2083	554	1187	1784	1184	1728	2807	1068	646	5234	1096	1511	1858	1128	204	2956	159	927	1344	1032	1785	1176	1825	1408	213	1074
OPRPN	1.46388	-1.30944	5.88904	0.0152354	0.410216	0	4	9	6	4	5	7	2	0	0	1	1	0	3	0	3	8	10	21	16	0	28	0	5	11	11	2	9	19	6	9	22	37	0	0	5	2	0	13	3	8	0	1	18
CBLB	0.149825	4.65372	5.88742	0.0152494	0.410216	708	750	651	813	674	498	691	596	625	458	626	630	517	741	668	487	985	678	801	368	404	554	463	657	578	576	569	633	869	472	612	641	596	617	465	532	687	547	634	630	380	542	617	778
GCHFR	-0.548522	1.34229	5.88417	0.0152776	0.410216	68	49	30	115	165	39	43	23	31	28	45	53	45	69	29	64	21	75	126	56	126	77	91	181	141	102	25	60	15	3	18	35	43	59	7	20	25	130	68	71	79	172	65	82
AASDH	-0.293491	4.13038	5.88356	0.0152829	0.410216	425	347	570	871	540	279	387	476	321	415	299	658	320	806	513	292	843	452	625	244	320	481	395	388	441	704	360	701	686	340	499	425	601	571	361	527	721	503	463	685	612	433	655	864
FOXN3	0.186979	5.33152	5.87925	0.0153203	0.410216	1038	843	1148	1233	914	842	1207	962	800	645	1005	1051	743	1446	1594	729	1455	1302	1120	683	822	641	958	828	1077	630	632	922	1297	631	693	661	947	1074	1165	760	1002	773	912	668	682	926	951	898
ASB14	0.227336	1.44352	5.87751	0.0153355	0.410216	39	47	75	84	87	70	49	63	45	48	55	71	55	63	55	52	85	56	111	58	30	38	49	54	69	55	49	77	91	52	79	73	74	76	43	45	57	67	68	65	52	66	40	75
RPS6KA5	0.338366	2.92885	5.87617	0.0153472	0.410216	139	113	139	276	191	217	237	196	91	205	144	146	129	118	182	114	270	293	279	141	212	139	118	244	126	93	156	145	137	167	208	224	150	270	259	162	115	109	150	184	110	160	148	185
KIF20A	-0.493238	-0.00775508	5.87329	0.0153723	0.410216	30	27	55	30	10	16	42	33	18	16	14	14	16	41	91	13	13	68	32	14	27	26	14	42	17	17	18	43	52	19	10	23	38	20	28	16	88	22	24	16	21	95	33	15
COL6A1	0.885117	5.643	5.87003	0.0154008	0.410216	223	268	795	549	307	138	499	176	99	216	212	271	293	492	539	424	581	944	548	360	61	643	207	267	211	262	285	653	830	368	338	371	352	415	67	153	307	178	665	517	405	636	599	464
FLT4	0.908962	-0.0171185	5.86948	0.0154056	0.410216	4	9	14	16	26	2	17	4	11	9	3	8	4	8	3	22	20	24	39	12	0	16	2	4	3	21	19	18	5	3	20	9	10	10	2	0	13	0	16	9	15	9	7	7
ARHGAP22	0.456321	1.27082	5.86556	0.01544	0.410216	8	43	47	70	78	52	60	51	36	22	70	49	37	27	24	34	86	65	121	45	25	56	16	38	27	17	30	57	61	53	63	48	43	53	37	15	36	39	38	54	36	29	73	50
ABCA6	0.55122	1.0001	5.86148	0.0154758	0.410216	24	36	32	118	66	16	45	86	22	39	31	34	11	19	36	24	152	35	59	6	1	42	23	17	45	32	31	119	93	12	66	44	49	90	16	43	81	16	30	49	27	40	31	108
ITGAX	0.816741	0.825011	5.86002	0.0154886	0.410216	40	76	15	11	34	7	15	21	1	3	4	1	14	7	13	58	53	26	34	18	8	11	3	0	99	65	36	28	56	31	43	47	19	57	6	6	33	6	22	15	3	24	15	7
SLC25A4	-0.280729	4.85815	5.85989	0.0154898	0.410216	702	425	718	1104	765	345	724	492	348	475	514	848	472	859	810	466	1000	1043	1347	718	954	771	846	736	665	914	340	663	705	389	334	581	602	622	428	557	546	619	607	1166	615	1291	763	758
EIF1AX	-0.230472	6.32684	5.85872	0.0155001	0.410216	1620	1689	1334	2620	2579	2358	2221	2438	2313	2231	2912	2986	2302	1917	2783	1804	2666	1690	4503	2438	2097	1610	2599	2303	1420	1618	1408	1773	2170	2015	1872	2870	1680	1730	1358	1562	1536	2093	2306	2645	2367	2648	3311	1743
ACAN	1.36326	-0.840063	5.8385	0.0156792	0.413706	2	7	0	2	2	0	1	0	0	0	0	19	0	1	0	0	7	0	0	1	0	6	0	0	0	2	0	2	11	2	10	1	42	8	2	3	3	7	36	1	7	5	0	35
ZNF222	-0.370419	2.31464	5.83773	0.015686	0.413706	108	155	178	191	153	137	149	173	142	173	122	120	82	145	128	81	271	142	201	85	89	126	137	109	73	203	60	202	162	130	102	143	142	266	143	105	177	120	104	221	154	113	208	207
CRIP1	-0.534008	2.28145	5.83339	0.0157248	0.413958	151	207	203	201	146	50	143	114	52	65	83	280	62	274	196	60	169	116	266	188	100	160	85	135	126	251	39	252	153	31	56	155	240	151	23	136	131	170	175	199	113	314	315	171
CD209	0.692084	0.964954	5.8273	0.0157793	0.413958	45	37	172	90	43	17	41	54	20	3	33	11	84	33	111	60	30	24	21	49	0	27	0	36	136	59	34	46	99	38	31	47	44	58	24	11	37	13	57	5	55	65	29	96
ANKRD37	-0.721823	3.52108	5.82579	0.0157929	0.413958	232	145	234	141	196	249	1446	205	189	120	344	128	264	350	1523	177	208	121	182	101	239	159	148	1095	1038	170	164	174	179	157	153	169	167	157	458	165	160	258	124	131	3690	264	168	183
CLEC7A	0.668558	0.240077	5.82457	0.0158038	0.413958	6	30	23	41	18	12	9	25	20	7	7	4	5	15	48	48	45	37	36	12	0	20	20	18	132	58	22	31	110	36	39	14	44	52	15	11	48	25	22	6	25	32	13	6
HGF	0.805813	1.11583	5.81894	0.0158545	0.414574	47	89	16	184	57	9	22	32	38	22	38	14	45	25	3	31	264	87	96	13	1	77	22	7	61	88	13	30	124	125	31	87	18	68	0	8	53	1	23	65	15	35	58	48
PELI2	0.281914	5.15259	5.80506	0.0159802	0.417148	633	793	802	1056	918	1451	1223	1285	999	1177	1180	792	1329	1340	1199	931	1130	1233	1014	677	817	581	658	1226	656	362	681	535	801	685	837	627	589	675	821	836	742	1088	804	656	714	1022	704	860
TREM2	0.977406	-1.04844	5.80125	0.0160148	0.417339	5	16	3	5	0	1	12	21	0	1	2	5	12	2	3	17	10	8	1	1	5	3	0	8	24	0	2	10	31	4	11	0	1	12	10	6	14	6	13	1	8	13	2	9
KRTAP2-3	-0.839142	0.585505	5.78861	0.0161304	0.419636	2	11	17	12	13	40	29	44	17	76	33	16	17	18	19	55	4	5	8	34	90	23	45	4	2	4	34	9	37	22	11	6	39	99	30	102	12	34	46	20	28	68	18	19
FMN1	0.424938	4.09477	5.76521	0.0163466	0.42307	152	237	188	826	674	113	353	439	230	336	178	1035	160	327	362	160	1063	314	432	136	233	150	219	219	206	671	184	294	368	210	257	538	344	443	166	422	365	467	429	514	257	327	581	1142
SMIM18	-0.79872	1.68849	5.76387	0.016359	0.42307	60	57	175	332	234	20	43	84	85	59	29	301	37	108	162	11	187	47	182	59	12	85	27	46	108	228	23	145	138	45	62	62	84	160	5	88	137	143	66	182	225	118	176	168
HS3ST3A1	0.550152	0.175858	5.76351	0.0163623	0.42307	18	28	46	54	29	10	22	19	32	3	8	17	7	13	15	18	24	49	28	24	5	39	26	23	9	18	19	7	60	15	11	28	29	18	4	8	37	12	24	14	26	43	32	38
MUC3A	1.07488	4.42275	5.76237	0.016373	0.42307	294	144	105	13	47	108	360	125	71	93	98	111	96	270	321	78	51	68	111	244	259	96	142	215	115	18	97	24	337	78	91	58	108	315	286	153	88	1136	79	82	55	146	47	54
UTRN	0.191114	5.92101	5.74934	0.0164948	0.423843	817	1235	1070	1380	1572	1145	1622	1416	1250	1185	1395	1226	1080	1611	1970	1160	1143	1395	1654	1189	989	1090	1063	1451	1457	1146	1547	1166	1926	1258	1393	1222	1069	1652	1595	1444	1222	1757	1582	1386	1349	2193	1751	1898
KBTBD12	0.568537	1.47849	5.74727	0.0165143	0.423843	60	41	55	25	30	40	80	111	49	75	62	76	58	39	59	146	7	50	58	67	51	26	145	65	166	15	28	13	75	89	51	98	34	22	58	38	20	32	82	17	39	23	39	35
EREG	1.07264	-1.33363	5.74672	0.0165195	0.423843	24	24	0	1	29	2	0	2	1	11	2	1	5	0	0	8	23	7	43	0	10	7	0	0	25	4	0	0	10	1	0	8	3	23	0	4	0	15	1	0	0	1	12	0
PLEKHA1	0.210298	6.64599	5.74594	0.0165268	0.423843	1843	2563	2508	4391	4014	2510	2538	2218	2734	2653	2581	2979	2088	2295	2832	2031	4305	2207	3630	1860	1872	2158	1570	2789	2537	3009	1998	1616	2621	2034	1930	2642	2035	2286	2217	1865	2132	2627	2741	2828	3022	2519	3813	3365
CTNNA2	-0.744798	2.29661	5.74439	0.0165414	0.423843	74	124	130	294	286	32	19	60	18	28	48	417	10	86	87	23	174	92	71	51	13	82	37	9	145	564	52	187	126	42	110	75	159	147	0	95	105	102	55	204	77	61	191	259
PNPLA4	-0.357578	4.74484	5.73694	0.0166117	0.424932	659	875	750	1153	920	807	1129	1054	605	454	1145	849	701	1361	1457	563	1316	550	944	545	507	609	779	624	804	945	418	1048	1262	598	797	605	1018	760	667	543	945	799	588	768	492	1034	1070	1135
PRCD	0.733297	-0.0816899	5.72412	0.0167334	0.427331	10	10	14	23	8	4	16	7	3	4	10	2	3	16	10	4	16	22	9	9	0	14	8	5	13	32	10	22	37	1	22	12	17	13	5	10	15	4	18	7	6	12	4	40
TRPT1	-0.211536	3.97918	5.71096	0.0168593	0.429829	501	348	472	621	524	342	462	377	263	298	422	344	309	466	498	399	575	680	504	311	401	466	459	510	626	537	291	422	422	236	300	326	319	427	262	209	339	574	390	520	363	614	439	394
ATP6V1C2	-0.24106	6.12601	5.6981	0.0169833	0.431435	2636	2067	1929	1804	2320	1544	2107	1770	1382	1739	2179	2275	1881	2643	2453	1569	1954	1830	2082	1390	1620	1433	1748	2319	2802	2241	1933	1361	2052	1455	1392	1612	1638	1900	2249	1681	1461	2234	2035	2315	2456	2574	2159	2171
DLAT	-0.181024	5.19906	5.69792	0.016985	0.431435	1267	1061	678	938	783	783	1112	856	715	976	925	1253	698	1164	941	606	1084	1036	1309	660	1045	694	909	1027	1129	1087	979	826	968	927	945	934	992	1069	937	962	733	1229	1117	1250	735	1153	1267	1210
SDSL	-0.226131	3.47095	5.69037	0.0170582	0.431435	319	430	246	404	422	250	363	276	128	252	303	249	269	345	373	179	526	438	513	217	295	338	257	237	383	310	241	302	323	135	248	229	278	243	297	170	278	297	309	179	208	363	273	339
INHBA	0.571636	7.48997	5.69023	0.0170596	0.431435	2597	6231	5382	7437	5065	2003	3020	1994	2520	1269	3195	3349	4549	2695	2951	3385	18785	7123	11102	2722	490	7419	1247	2427	7260	8422	4924	3501	6139	4412	5651	5860	4108	3904	791	1872	3661	1976	8229	9222	4890	4412	7736	4242
NTNG1	0.678301	0.46337	5.68984	0.0170634	0.431435	16	31	25	47	47	2	18	17	2	31	18	31	9	36	19	8	85	20	33	19	3	9	1	18	5	28	3	17	41	22	13	12	40	15	1	112	40	13	58	63	44	24	20	93
RNF144A	0.286694	4.18913	5.68541	0.0171065	0.431812	256	423	399	497	548	308	407	432	353	309	319	342	311	189	308	388	470	541	401	574	365	383	436	353	330	404	323	501	750	372	413	473	811	182	279	253	648	189	396	311	347	279	300	239
RGS9	-0.639115	4.99952	5.67696	0.0171891	0.432488	751	462	837	1727	1201	223	399	432	184	479	301	1770	304	1278	770	275	860	459	1152	310	122	457	396	185	716	2036	378	1449	1021	299	753	419	977	1012	63	463	1147	1785	627	1407	549	1060	914	1957
PLEKHO2	0.615926	1.97295	5.67689	0.0171898	0.432488	70	62	71	56	65	29	53	46	24	10	51	29	28	37	136	53	48	78	37	13	46	50	32	42	69	35	54	44	93	24	69	65	19	55	66	49	66	40	58	70	28	89	52	42
SCRN3	-0.213797	4.3134	5.6701	0.0172565	0.433452	498	362	543	799	818	380	731	595	338	516	400	697	450	623	632	419	967	401	877	248	301	362	477	420	485	645	290	557	712	404	500	363	560	597	475	444	810	579	422	753	514	502	688	859
DGKI	0.503762	0.605898	5.66436	0.0173131	0.433477	23	37	48	58	6	16	39	27	27	16	14	22	18	11	33	15	86	34	40	30	14	46	25	36	44	41	34	83	75	49	40	28	30	46	3	37	53	19	43	27	46	52	49	32
HHAT	-0.366299	2.333	5.66425	0.0173141	0.433477	170	105	85	194	90	60	105	75	51	108	84	125	82	134	94	77	225	119	184	57	96	96	83	160	220	173	45	143	100	30	105	81	115	127	76	86	187	114	88	118	87	187	98	163
SCIN	-0.557326	3.8432	5.65558	0.0173999	0.433546	662	827	306	1244	749	133	357	332	243	252	78	688	149	658	476	78	700	349	456	209	67	313	138	136	360	941	157	1030	531	121	298	297	469	742	17	403	622	670	192	779	256	299	575	443
FBXL2	-0.321609	3.53176	5.65431	0.0174125	0.433546	433	315	397	480	408	108	227	240	95	141	275	247	132	378	228	180	401	333	360	146	204	302	262	261	478	450	225	555	424	135	421	257	408	420	194	310	434	195	212	544	285	355	385	770
FLVCR2	0.624863	-0.485425	5.653	0.0174255	0.433546	9	24	11	16	17	6	7	16	0	11	8	0	0	12	16	11	10	24	13	4	11	4	11	0	33	29	8	23	46	25	34	17	22	28	7	15	12	6	12	4	8	7	13	10
SLC26A4	0.755959	1.54754	5.65253	0.0174303	0.433546	5	23	38	71	129	22	25	15	1	22	19	189	9	55	49	33	107	15	708	10	30	13	20	67	319	70	66	58	57	18	23	40	56	46	7	33	71	327	125	72	28	19	70	74
SURF1	-0.238326	4.06792	5.62148	0.0177416	0.440574	342	246	457	350	494	305	524	371	404	360	451	348	342	469	730	448	502	330	544	286	609	394	261	436	242	370	270	519	474	269	285	331	382	402	457	415	453	414	321	362	322	470	301	475
EDNRB	0.680907	3.43122	5.60347	0.0179249	0.443131	149	699	157	552	377	61	103	32	85	131	161	227	402	47	52	206	1080	335	569	109	25	500	45	51	202	538	143	276	252	335	273	733	130	351	15	65	187	89	272	405	263	140	545	294
LEAP2	-0.618415	1.30507	5.60311	0.0179286	0.443131	80	63	91	54	69	59	295	75	36	46	46	25	51	275	158	40	80	21	53	24	171	19	33	337	103	59	62	39	67	68	37	36	55	82	223	19	51	142	32	51	95	69	44	39
UBAC2	-0.177507	5.49264	5.60283	0.0179315	0.443131	1518	1374	1156	1602	1335	1073	1356	1129	1053	1166	1428	1274	965	1402	1358	775	1975	1379	2012	709	1157	1051	1061	1349	1463	1384	852	1196	1294	1068	1103	1236	1024	1482	1150	1178	983	1453	1004	912	1164	1312	1278	1242
TMEM39A	-0.233362	5.25105	5.59298	0.0180326	0.444889	941	975	848	1312	1188	861	1082	1057	833	943	1282	1155	1047	1099	1046	760	1655	969	1614	590	606	866	669	1006	937	1449	1289	1056	1147	947	963	1231	1040	1527	1047	962	1015	1033	991	1693	1409	803	1348	1129
TAAR1	-0.81903	-1.69762	5.58922	0.0180713	0.444889	14	4	0	20	20	1	10	5	0	0	2	5	2	18	12	1	40	0	30	2	1	0	0	5	9	6	9	7	6	2	0	9	4	6	0	14	5	10	7	12	18	19	11	25
TBC1D2	0.668224	1.46725	5.58742	0.0180899	0.444889	22	26	55	47	67	24	34	15	36	29	16	28	29	49	23	50	35	28	57	4	42	17	15	26	16	3	12	34	30	20	23	49	32	53	21	19	56	30	21	14	26	24	22	31
SPAG17	-0.351629	0.823692	5.57896	0.0181776	0.445908	33	34	61	28	26	76	62	69	29	55	47	26	52	45	69	29	50	30	35	29	19	24	16	109	53	26	34	36	39	39	37	75	25	46	67	38	23	51	102	64	41	75	51	46
STAT1	0.249669	6.77211	5.57425	0.0182265	0.445908	1873	2775	2797	3799	3740	2178	2494	2278	1434	1653	2520	2715	3839	3325	3588	1413	5025	1945	6819	1333	1701	2336	1775	2559	2028	2109	1746	1409	2545	1573	1487	3203	1919	2461	2151	2028	2317	2547	2472	3005	3333	2322	3353	2715
TM7SF2	-0.463626	3.56957	5.5706	0.0182645	0.445908	333	278	243	215	232	190	302	193	112	196	281	198	173	408	242	172	184	264	198	192	293	126	208	301	178	353	75	334	346	83	208	83	239	227	247	210	250	289	142	175	150	450	182	247
IL6	0.697367	4.19513	5.56962	0.0182747	0.445908	389	1540	257	427	614	237	471	303	241	197	346	212	681	80	212	233	2448	224	1613	238	185	366	90	255	1067	214	332	62	418	535	361	414	187	653	336	384	147	226	357	827	708	171	368	293
MAP4K4	0.203822	6.99203	5.56939	0.0182771	0.445908	2400	2418	2571	2918	2539	3115	2910	3126	2650	3351	3798	3318	3091	2334	3322	2408	3381	3311	3996	2302	2421	2047	2190	2636	1818	1431	3042	2299	3132	2752	2816	3718	2169	3194	2459	3583	2120	3475	3411	3786	2321	2900	3584	2939
SHC4	-0.550892	2.95385	5.56083	0.0183667	0.446345	171	170	63	114	81	274	229	226	395	383	763	266	99	155	174	269	189	199	401	246	111	108	141	165	94	44	344	137	87	343	229	492	123	246	237	289	52	166	328	281	246	271	198	86
CTH	-0.443951	3.22538	5.56025	0.0183728	0.446345	387	172	244	204	151	455	456	363	265	298	413	282	174	334	390	351	162	656	170	287	387	233	324	410	298	149	274	116	235	359	273	227	169	285	579	246	138	178	242	176	377	342	240	192
NNT	-0.240003	5.75469	5.55932	0.0183825	0.446345	1189	1163	1637	1572	1243	904	1310	1211	652	1136	1063	1551	964	2054	1778	1205	1640	1527	1526	994	990	1046	1358	2056	1851	1866	958	1516	1478	605	836	1001	1345	1089	889	1247	1393	1733	1447	1392	982	1837	1577	2306
NRDC	-0.163438	6.97466	5.54761	0.0185059	0.448298	3588	4530	3214	4372	4400	2480	3170	3143	2345	2751	3339	4507	2861	3537	3521	2193	4128	3817	5200	2002	2502	2959	2489	2873	4281	5547	2673	3485	3604	2570	3184	3652	3330	3489	3034	3418	2998	3843	3309	4234	3273	3954	4056	4252
PANK1	-0.359808	1.61683	5.54413	0.0185428	0.448298	96	34	53	93	95	98	90	64	53	72	100	54	97	101	83	73	60	71	64	61	17	91	67	30	53	53	72	104	78	25	92	45	51	105	82	62	34	54	81	63	138	136	101	32
CLYBL	-0.280436	1.83218	5.54337	0.0185509	0.448298	125	79	84	86	144	74	102	75	35	66	114	101	110	63	102	112	67	110	115	78	92	66	140	113	104	70	48	121	163	57	36	64	113	82	113	75	72	112	106	53	67	119	117	101
CSF1R	0.605152	1.39684	5.53666	0.0186221	0.44931	23	86	47	61	58	4	13	62	44	3	25	22	52	57	49	98	88	63	58	44	0	54	21	16	261	66	51	72	131	42	98	18	14	43	4	20	49	11	85	36	17	36	64	52
SYNGR3	-0.901941	0.680209	5.52652	0.0187303	0.451208	8	12	34	37	11	8	7	27	7	3	26	33	8	13	28	20	33	15	10	3	15	3	24	14	12	13	4	60	25	12	19	12	7	31	9	10	23	19	18	17	7	32	12	51
BATF3	0.617988	-0.515041	5.52025	0.0187976	0.451717	22	21	15	43	41	7	15	14	0	0	12	5	28	11	15	2	47	14	78	8	35	14	0	2	25	10	6	8	14	7	4	26	12	22	9	3	7	1	12	22	9	13	17	4
PLAU	0.381587	5.67822	5.51905	0.0188105	0.451717	1191	1083	2241	1096	475	564	1382	1041	826	751	972	800	719	1213	1132	925	2370	2464	2601	1168	882	1519	641	603	820	982	958	740	1836	1588	853	1042	882	1034	578	772	967	786	1010	1135	806	1128	1962	1277
CD48	0.65299	1.00672	5.50888	0.0189202	0.45364	17	102	70	125	53	30	72	73	39	9	40	19	82	2	101	73	96	42	124	33	1	37	7	21	103	74	41	6	47	39	45	116	24	75	10	15	42	7	41	67	80	52	68	47
GBP1	0.588027	5.9741	5.49972	0.0190195	0.45487	1694	2456	1037	1005	1459	3111	2260	1186	826	1248	3084	1597	2185	847	2161	1152	1748	686	3544	924	2206	1262	1249	1755	2164	1380	2331	344	994	1817	961	1903	690	1805	2314	2151	612	2211	1778	1326	2682	851	2163	713
SULT1C4	-0.624956	0.980199	5.49867	0.019031	0.45487	45	89	72	38	37	51	24	55	33	35	89	12	107	36	62	63	22	35	34	47	8	33	104	104	66	14	5	26	67	19	22	48	50	45	20	74	21	137	47	107	50	63	90	16
KCNN2	0.487529	0.134035	5.49232	0.0191002	0.455704	15	2	1	49	20	32	25	19	7	38	37	19	16	21	21	18	13	33	81	3	27	35	10	13	21	12	39	17	21	36	17	48	20	13	11	4	17	6	23	42	22	12	31	9
PRR16	0.51006	0.777254	5.4865	0.0191639	0.455704	61	82	51	82	51	5	33	32	17	14	21	21	28	22	47	41	197	93	38	24	2	39	33	13	25	40	24	15	125	35	21	38	39	49	20	19	35	14	53	28	33	30	43	15
FASTKD1	-0.275932	4.82348	5.48345	0.0191973	0.455704	633	723	735	1470	931	732	746	856	450	713	812	1337	684	968	951	661	1147	594	1015	480	510	555	500	793	669	1132	610	1162	921	653	792	732	954	948	431	713	877	832	654	850	1108	889	903	1170
PRDX4	-0.368047	7.37195	5.48089	0.0192254	0.455704	4461	3769	5178	7181	7201	4587	5173	4444	4187	4708	8055	5936	4675	7492	7227	5980	5029	4468	5522	3820	5528	4634	5790	7795	5888	3943	4322	4402	4174	3093	3185	3541	3935	5221	3937	3616	3065	4533	5692	5734	6764	6380	5048	5610
PDE7B	0.499178	1.00159	5.47893	0.0192471	0.455704	29	12	61	125	51	30	45	64	16	30	26	21	30	31	46	30	130	103	19	41	16	34	17	32	27	42	40	48	44	28	37	11	43	53	6	40	33	40	88	85	38	76	30	72
SPPL2A	0.235885	5.80645	5.47773	0.0192603	0.455704	1151	1134	1185	2102	2068	1021	1398	1297	1115	1110	1280	1094	1220	1402	1700	951	2558	857	1582	885	1127	816	796	1261	1438	1075	727	677	1423	945	789	1052	930	1150	1024	1146	1149	1154	1049	1057	1361	1068	1012	1407
XKR9	-0.623966	2.17831	5.4739	0.0193025	0.455704	168	95	122	38	160	186	331	185	65	132	139	26	9	190	100	100	485	114	286	91	149	109	164	143	149	126	102	94	179	238	103	211	25	35	187	152	184	378	56	109	96	42	142	160
MMUT	-0.255749	5.82955	5.47375	0.0193042	0.455704	1520	1746	1590	2351	1421	1213	1834	1432	878	1406	1384	1536	1200	2634	2034	1222	2199	1412	1714	829	999	1382	1434	1959	1942	2848	1098	1960	1737	1268	1504	1508	1740	2093	1501	1300	1865	2093	1531	1910	1660	1986	2072	2743
AHRR	0.595069	2.02785	5.45286	0.0195364	0.460338	33	69	31	94	89	27	19	32	33	45	23	59	39	75	37	40	245	72	112	58	11	20	35	46	44	69	72	56	132	50	133	91	50	70	8	10	45	52	83	68	41	71	62	137
NUDT17	-0.228183	1.84693	5.44816	0.0195889	0.460338	98	107	90	130	143	67	87	78	63	81	103	97	66	79	91	63	129	90	93	78	60	77	71	63	103	187	77	146	131	66	85	90	105	120	63	70	122	81	80	114	67	103	106	134
CEACAM6	-0.685979	7.73854	5.44555	0.0196182	0.460338	26159	32900	7277	1431	1630	3630	16781	6977	1031	4064	3096	2828	4466	6189	3630	1464	1314	2932	13369	7145	4998	2179	3820	12833	6131	1474	2784	1102	4513	2086	2399	4347	5554	27186	8409	14401	3579	37763	1776	3034	3323	5053	7912	2543
ROBO2	-0.707086	4.80794	5.44532	0.0196209	0.460338	365	478	601	1674	640	142	277	647	385	777	207	1263	180	621	637	240	745	652	944	334	106	518	325	137	364	1723	169	2433	1053	343	657	536	905	1179	53	821	1307	572	567	855	359	828	1196	1479
IGF1	0.715931	0.699192	5.4412	0.0196672	0.460719	7	71	29	80	53	50	32	42	17	37	18	46	37	36	49	61	183	59	56	46	27	15	27	14	43	76	40	22	109	31	19	56	12	51	8	9	50	8	68	15	10	22	40	15
PRLR	0.309233	3.9749	5.4345	0.0197428	0.461782	260	393	418	493	367	368	239	366	322	435	356	605	409	645	464	134	372	283	405	260	284	229	248	324	356	630	271	452	432	296	179	526	431	162	241	539	406	254	388	307	327	423	802	456
BTNL8	-0.910168	0.498075	5.42536	0.0198463	0.463495	114	130	94	7	41	59	134	0	19	1	43	28	29	34	111	25	17	0	28	5	45	11	22	24	168	23	31	0	76	31	20	20	16	167	45	46	4	164	24	4	11	79	42	7
CCL4	0.717234	2.13316	5.40757	0.0200496	0.467529	88	159	98	260	57	89	49	58	70	36	129	53	297	58	61	137	386	49	426	69	20	45	20	69	164	121	124	66	142	69	179	192	91	118	28	40	91	39	92	162	243	111	78	85
GFPT2	0.479604	2.76821	5.39944	0.0201432	0.468647	76	321	167	383	160	69	112	53	111	56	90	66	113	76	73	183	434	217	402	57	16	256	55	81	155	199	140	152	265	174	205	284	134	187	16	64	109	38	181	235	168	134	320	170
SH2D2A	0.562305	-0.350608	5.3975	0.0201656	0.468647	20	12	10	36	17	7	9	8	17	6	16	11	15	1	11	25	44	27	28	6	4	20	3	15	5	5	19	12	17	7	4	7	5	15	2	9	8	1	23	15	8	18	10	13
CFAP20DC	-0.37522	2.02339	5.39541	0.0201897	0.468647	63	56	70	161	56	50	75	135	54	138	122	179	32	151	101	26	168	127	99	55	71	86	118	48	59	148	73	60	100	45	66	118	130	137	52	121	132	160	89	107	82	102	127	104
SORBS1	0.268797	4.12642	5.39279	0.0202201	0.468647	465	590	494	440	472	240	469	264	219	226	244	197	410	600	397	207	422	208	614	196	323	336	251	871	720	794	188	509	521	345	237	402	476	207	393	247	422	404	332	311	402	514	459	587
GLYATL2	-1.16887	-0.0886737	5.37816	0.0203904	0.470222	21	22	40	2	17	21	120	12	25	1	73	27	8	74	129	10	0	18	0	5	71	15	1	26	129	0	29	0	31	0	9	3	1	11	38	13	24	28	18	0	6	83	15	0
NFATC2	0.268048	3.57644	5.37612	0.0204143	0.470222	281	281	177	825	450	315	375	331	228	217	320	274	299	135	381	274	530	277	301	154	285	107	242	276	173	130	176	276	298	262	261	138	152	287	286	221	294	259	323	234	267	272	253	470
IL16	0.368319	0.982194	5.37385	0.0204408	0.470222	39	33	39	61	51	37	39	30	12	28	33	23	52	27	62	39	45	101	56	29	10	30	42	20	92	99	26	52	80	41	73	41	46	47	31	22	45	53	19	47	23	46	40	69
BMP8B	0.272109	3.28015	5.36891	0.0204988	0.470222	178	211	126	294	182	287	167	194	191	374	221	211	210	167	330	141	234	165	197	160	220	196	144	129	120	165	119	205	239	213	207	246	143	325	163	257	151	160	260	384	240	163	195	230
TRIM32	-0.254906	4.28122	5.36666	0.0205252	0.470222	956	1104	416	367	379	490	482	397	433	276	693	630	535	577	537	493	719	491	644	335	393	481	280	770	937	705	330	458	562	429	399	442	433	621	800	512	471	682	614	489	405	578	693	617
TMEM108	-0.647817	1.30544	5.36602	0.0205328	0.470222	5	15	31	121	90	36	30	19	68	87	51	94	30	80	26	18	114	83	102	26	22	95	16	11	22	72	24	126	80	29	71	40	33	45	4	48	64	68	31	104	29	74	95	82
TP53INP1	0.287676	6.2358	5.36446	0.0205512	0.470222	1726	1367	1986	1981	2063	2729	2418	1818	1994	2454	2458	2835	2452	2855	3008	1876	2010	1505	1918	1996	2274	1255	1628	2181	1078	701	1235	1063	1698	1484	1071	1316	1240	1233	1688	1968	1362	1810	2026	1298	1454	1974	1717	1689
SMIM5	-0.573035	1.20594	5.3639	0.0205578	0.470222	51	75	61	80	64	20	62	42	54	26	29	199	40	95	48	19	51	11	66	6	39	17	32	28	22	86	16	57	47	2	43	54	59	86	10	54	50	96	28	73	39	18	121	59
ST3GAL5	-0.375803	3.61184	5.36331	0.0205647	0.470222	260	207	284	359	302	168	519	325	222	297	242	287	192	518	495	107	185	428	386	195	414	205	325	679	187	169	143	416	399	86	206	187	475	365	462	307	373	417	159	178	232	440	179	356
IFIT1	-0.442626	4.77922	5.35236	0.0206943	0.472478	546	1692	1198	1022	889	300	488	810	395	332	998	1031	869	1284	949	356	1079	633	1319	205	356	384	268	645	515	1016	1648	854	650	342	590	1182	587	1579	629	858	1006	654	471	1209	1606	691	883	626
PCDHB6	0.562885	0.431555	5.33684	0.0208793	0.475992	21	14	24	13	45	13	7	20	19	13	2	27	6	6	30	13	35	26	23	11	8	23	35	6	5	25	9	33	40	26	19	23	39	31	18	36	34	24	55	60	14	13	39	56
FAM180A	0.607846	1.88673	5.33065	0.0209536	0.476975	61	198	101	196	79	58	63	46	83	33	95	69	77	22	42	136	355	173	124	48	0	187	32	18	56	110	29	149	164	64	146	89	52	134	21	35	33	10	180	149	51	66	183	90
SRPX	0.570833	0.390268	5.3224	0.021053	0.478111	24	11	34	19	3	10	58	0	16	10	13	29	16	42	44	22	22	33	24	12	12	49	11	11	18	33	20	38	109	11	46	16	26	29	7	2	23	28	52	5	41	38	19	25
APOM	-0.238315	2.43653	5.32132	0.021066	0.478111	115	138	175	199	208	131	199	119	151	180	138	220	178	170	167	143	295	123	151	71	92	109	156	134	156	153	99	183	188	102	100	93	122	228	145	140	169	190	131	178	108	236	130	194
PIMREG	-0.452927	-1.48102	5.30848	0.0212219	0.480234	9	1	6	13	17	11	8	10	5	5	10	10	7	7	17	8	5	6	6	6	7	4	7	2	4	11	2	24	8	7	3	6	7	10	5	19	3	22	7	5	6	29	4	19
MAD2L2	0.283561	3.35862	5.30844	0.0212224	0.480234	219	144	192	258	221	317	214	138	172	192	260	226	229	158	327	288	349	358	338	180	242	220	212	191	179	221	156	166	144	152	150	180	145	86	165	178	118	190	264	230	157	262	193	161
ZBTB16	0.480633	1.03842	5.30001	0.0213253	0.481003	77	50	31	49	92	50	18	74	44	28	28	17	52	46	43	15	105	51	25	22	11	18	12	28	26	20	25	28	28	13	19	25	46	31	42	17	23	32	22	16	26	25	18	44
BTBD3	-0.292206	5.70987	5.3	0.0213254	0.481003	1012	1253	1557	2374	1656	775	1110	1154	764	888	905	2307	873	1664	1257	660	2064	1248	1710	704	574	966	706	1018	1087	2320	572	2066	1450	781	979	1416	1783	1488	604	1236	1934	1345	1130	1505	859	1629	1851	2160
MYL11	-0.730981	-1.57473	5.29756	0.0213554	0.481003	9	7	17	26	17	3	2	8	0	12	5	10	11	9	14	11	38	6	26	4	2	11	7	13	7	14	0	21	8	4	12	9	7	16	5	6	6	13	5	15	7	11	16	10
RBM17	0.151138	5.20645	5.29538	0.0213821	0.481003	708	762	753	949	1061	753	843	915	643	951	980	850	775	779	1245	791	1016	747	1113	534	852	583	836	813	644	754	829	682	1000	709	817	888	732	972	905	868	749	849	867	948	619	860	758	1006
ATP6V1A	-0.299138	7.3132	5.2893	0.0214568	0.481581	5072	4913	5058	6992	5548	3164	4379	4896	3184	3591	3860	6622	3816	6797	5379	2890	7582	4406	7257	2419	2894	4299	3667	4933	5310	9305	2901	4995	5645	3171	3945	5067	4461	5452	4086	4095	5288	5258	3542	5477	3431	5585	5306	6485
LPAR4	-0.72017	-0.0293226	5.28817	0.0214708	0.481581	8	15	8	50	74	1	15	15	25	23	1	102	28	1	34	16	23	17	11	9	4	50	5	18	19	123	15	39	14	36	35	18	34	37	3	31	21	13	23	82	21	4	31	83
LDOC1	-0.345144	3.73163	5.28528	0.0215065	0.481676	261	198	228	582	467	135	209	194	189	201	193	417	203	331	329	165	454	555	496	211	267	389	391	257	389	721	147	391	319	137	208	282	291	282	118	181	351	308	361	717	250	479	361	425
PCDHB7	0.636017	0.86033	5.2817	0.0215507	0.481962	24	8	33	69	71	1	13	8	4	13	9	36	15	29	16	12	69	43	35	9	28	43	40	32	14	44	18	31	65	23	43	19	35	12	0	31	38	54	66	50	34	13	67	114
ACOT8	-0.231402	2.97857	5.26795	0.0217216	0.485072	384	286	237	310	234	100	253	194	104	166	239	205	153	285	248	168	339	178	206	92	213	174	172	122	263	362	138	217	284	96	126	123	213	200	190	109	192	232	141	185	131	218	199	246
KCNC1	0.73226	1.33101	5.26141	0.0218034	0.485275	9	33	37	52	69	20	21	43	14	20	11	25	27	54	40	18	73	8	24	31	1	60	44	20	16	37	17	65	46	12	41	30	52	60	0	25	40	19	59	67	33	29	68	75
COL7A1	1.01925	4.28359	5.26081	0.0218109	0.485275	69	152	159	125	120	47	119	88	44	47	65	53	79	93	48	60	432	205	157	60	22	150	36	52	42	80	107	54	293	112	114	86	69	106	13	20	89	43	108	89	40	74	67	101
PRKCE	0.334043	4.65502	5.25962	0.0218258	0.485275	331	615	782	1219	1092	276	598	573	377	317	334	641	404	572	383	207	963	640	1177	440	344	568	296	414	669	927	435	1131	1081	364	664	825	1125	429	268	437	988	356	475	754	448	441	813	1056
REELD1	-0.682896	-1.27253	5.25697	0.0218591	0.485309	9	11	18	8	6	5	26	11	20	5	25	8	4	16	0	5	8	10	30	9	13	13	0	9	15	1	5	3	10	6	21	13	3	13	8	11	6	9	9	13	10	3	13	35
HIC1	0.515676	2.7154	5.246	0.0219972	0.486672	86	154	119	171	151	64	66	77	51	54	92	85	95	61	89	84	188	141	122	48	63	97	62	100	120	124	108	115	117	75	118	104	110	96	52	50	76	43	112	124	91	82	121	105
BOC	0.564551	1.89827	5.24197	0.0220483	0.486672	11	52	77	113	117	29	51	41	20	26	45	49	38	94	64	25	131	45	152	46	21	44	25	22	63	90	22	115	78	31	74	57	119	22	17	43	103	38	68	109	53	64	85	97
SPATS1	-0.723107	-0.672846	5.24084	0.0220627	0.486672	29	5	10	3	32	14	24	13	12	29	15	6	3	10	21	12	102	34	14	13	2	3	10	10	7	46	8	40	21	12	18	3	25	37	1	38	63	13	8	28	9	19	17	16
SYAP1	-0.193408	6.24146	5.23971	0.022077	0.486672	2561	2567	1785	2382	1908	1762	2456	2005	1608	1726	2114	2483	1767	3013	2739	1496	2046	1838	2877	1629	2086	1658	2112	2254	3018	2861	1712	2386	2280	1556	1826	2118	1988	1992	1645	1876	1941	2411	1980	2040	1749	2521	2435	2501
C17orf58	0.18984	2.75317	5.23951	0.0220795	0.486672	224	147	188	209	150	156	227	148	101	102	144	174	189	215	258	108	346	128	201	112	130	130	101	157	204	247	105	215	166	132	127	160	197	168	136	118	121	173	151	188	149	212	183	215
VSTM2L	0.750729	1.72592	5.23568	0.0221282	0.487043	29	68	47	81	75	21	45	2	14	7	2	23	18	92	19	13	60	32	118	46	10	110	28	22	23	55	28	49	101	40	23	89	80	22	3	29	46	13	42	49	36	46	151	80
SPAG6	-0.613847	1.99836	5.22907	0.0222124	0.487295	64	150	139	328	343	17	38	80	110	76	67	196	57	153	95	43	290	143	230	35	22	116	29	35	92	260	21	201	77	80	155	86	201	110	8	81	188	127	82	185	68	158	81	215
UMAD1	-0.303619	4.75998	5.22582	0.022254	0.487295	555	881	700	1251	912	784	897	879	680	770	766	1085	841	1207	883	661	1138	822	926	446	376	683	555	677	757	975	588	1277	997	710	761	858	730	813	690	683	862	776	685	708	1110	786	905	1188
NPM2	-0.323009	2.68876	5.22225	0.0222996	0.487295	241	169	229	244	244	61	176	82	79	122	103	252	119	135	204	142	327	133	197	117	86	124	113	87	202	341	76	179	191	41	148	100	184	168	108	114	180	179	122	181	94	179	151	211
OXGR1	-0.765982	1.7671	5.22036	0.0223239	0.487295	94	60	44	347	213	30	37	112	80	108	37	395	64	150	177	48	125	39	49	52	22	20	37	20	72	313	44	275	64	58	72	50	116	154	0	91	67	127	110	90	68	131	99	103
CEP120	0.23275	3.84298	5.22015	0.0223267	0.487295	238	178	443	506	396	273	286	360	384	242	280	401	360	239	430	227	602	405	335	244	108	218	249	285	182	175	182	405	387	230	263	233	288	346	203	296	336	337	317	368	357	287	360	294
FOCAD	-0.193173	5.35332	5.21983	0.0223308	0.487295	801	1245	965	1384	1110	772	1144	875	803	740	856	1355	1007	1083	1031	679	1261	803	1555	698	525	825	868	802	1253	1438	807	1545	1067	550	937	832	1053	1056	772	992	1183	1094	751	1201	693	1005	1570	1474
CLXN	0.906821	-0.339292	5.21408	0.0224047	0.488211	15	13	0	4	6	28	24	3	1	35	33	40	12	0	23	17	17	17	43	21	11	36	0	12	16	6	4	8	1	7	103	16	16	4	4	14	8	15	26	19	46	8	22	0
TMEM116	-0.295877	2.73621	5.20858	0.0224757	0.489062	233	128	285	204	136	165	215	173	98	184	178	150	119	296	274	129	407	296	264	80	114	176	106	163	228	203	140	314	304	70	175	175	217	199	230	112	219	193	134	220	219	214	203	237
PTPN22	0.481995	0.405972	5.2047	0.0225259	0.489257	15	19	17	16	12	25	41	63	1	44	33	0	18	60	98	32	35	17	18	37	15	13	34	22	39	42	22	39	58	28	40	31	13	55	29	37	37	32	11	35	23	33	27	11
IDH1	-0.386442	7.17851	5.20295	0.0225486	0.489257	6206	5342	4865	2594	3512	4576	6130	4401	2858	3035	6096	3462	4818	7209	7598	3905	2747	2395	3773	3001	5657	3147	5065	7846	7843	3410	4738	3125	6213	2800	2912	2054	2999	3388	10728	3296	3000	5984	3962	2245	4379	7413	4164	3733
CAB39L	-0.214035	4.28533	5.18244	0.0228162	0.494347	635	730	489	640	681	521	623	577	444	575	592	901	350	608	809	286	654	401	572	236	496	369	392	576	764	835	422	485	459	427	496	395	365	652	377	468	577	682	486	569	498	620	573	629
CRISP3	-1.32065	3.38994	5.18004	0.0228478	0.494347	889	303	232	2	43	127	589	398	18	190	2	37	37	40	762	26	2	1	235	643	176	94	152	93	226	2	21	1	12	2	34	129	507	1641	199	1824	12	6135	49	79	44	45	193	4
STAU2	-0.223832	5.48907	5.16932	0.0229892	0.494767	1093	1319	1261	1857	1505	903	1114	1099	742	997	1007	1638	1124	1355	1714	944	1631	1153	1500	682	898	934	869	1176	1722	1806	865	1580	1362	758	1202	1202	1300	1406	1246	1309	1374	1633	1074	1466	1421	1635	1604	1989
APPL2	-0.191141	5.95046	5.16896	0.022994	0.494767	1544	1335	1555	2587	1731	1213	1555	1675	1159	1446	1748	2677	1382	1734	1574	1329	1797	1386	2185	1315	1242	1363	1279	2059	1744	2351	949	2478	1932	971	1487	1584	1845	1785	1254	1409	1636	2261	1478	1938	1243	2035	2403	2045
CD302	-0.282072	2.07412	5.16797	0.023007	0.494767	126	55	105	184	150	66	71	81	83	72	89	133	91	123	101	89	122	92	146	80	88	108	65	93	78	110	61	131	115	80	60	78	99	76	54	60	105	106	96	128	63	177	111	180
IRX1	0.90784	-0.479448	5.1674	0.0230147	0.494767	5	7	14	7	11	2	1	1	6	0	3	8	7	26	11	0	3	3	10	4	0	13	3	7	4	8	5	15	23	3	7	5	13	2	2	3	14	0	4	4	7	3	11	10
RFX8	0.575792	0.524333	5.16265	0.0230777	0.494767	12	56	58	35	25	7	43	20	29	9	13	6	14	30	23	25	110	115	88	21	0	21	22	19	20	35	15	55	92	53	55	38	43	28	7	11	29	16	22	20	8	24	25	22
COL12A1	0.744044	3.09593	5.16082	0.0231019	0.494767	47	56	49	75	24	67	98	157	65	47	65	50	70	56	131	157	97	180	82	147	37	58	130	107	43	46	45	70	188	71	80	41	51	92	29	56	57	84	128	60	76	88	86	43
VPS50	-0.16919	4.52066	5.15989	0.0231143	0.494767	592	730	636	684	638	489	665	562	436	654	690	492	408	636	782	545	716	596	715	339	505	413	557	750	575	523	417	694	697	505	559	656	611	596	594	715	690	625	593	588	863	691	799	740
GLT8D2	-0.652117	4.0318	5.15902	0.023126	0.494767	175	518	531	959	404	145	247	569	214	406	230	585	230	746	658	118	280	569	597	177	51	274	282	101	632	1111	103	1156	952	171	786	289	711	853	16	475	1500	455	218	590	540	917	803	1342
SFRP2	0.55154	5.26747	5.15532	0.0231753	0.495129	681	1065	950	1690	655	258	638	529	153	510	496	513	637	385	1453	967	3745	2101	510	394	50	1230	550	337	669	1132	275	2178	1868	579	1019	580	1154	1087	154	390	1852	333	1150	447	625	1143	1412	772
UGT2B17	-0.848163	1.07984	5.13803	0.0234072	0.49882	99	22	50	6	17	41	88	23	4	17	39	10	19	257	132	7	8	12	13	32	108	14	37	153	108	5	112	11	40	13	6	5	17	41	67	14	47	141	22	5	37	134	14	18
SH3RF3	0.582897	0.788936	5.13634	0.02343	0.49882	10	13	3	33	25	5	24	29	43	12	26	42	36	4	22	23	51	67	48	11	3	29	8	19	12	27	18	18	35	18	33	58	8	22	16	12	34	28	16	57	14	30	38	18
ZNF496	0.3231	3.7188	5.13355	0.0234676	0.49882	397	272	152	203	190	312	252	232	161	337	400	254	333	208	254	184	230	359	286	231	209	200	224	214	186	181	239	178	198	247	187	269	215	294	246	302	220	252	300	321	198	268	208	246
COL6A2	1.23324	5.30571	5.12636	0.0235651	0.49882	33	53	125	127	93	28	59	21	18	16	24	47	42	64	72	35	112	173	88	49	9	132	37	48	34	60	66	94	101	91	72	66	53	74	11	11	60	16	72	59	51	56	68	71
ZNF549	-0.271749	2.79605	5.12432	0.0235929	0.49882	157	171	157	333	294	126	189	175	35	148	147	139	88	129	97	114	340	244	334	114	197	172	91	172	105	343	152	303	188	119	138	217	235	163	123	239	196	142	185	305	116	140	274	313
AJAP1	0.635391	0.683632	5.12367	0.0236016	0.49882	70	0	80	5	12	5	24	33	4	42	31	7	34	50	2	31	16	27	26	17	29	11	5	78	24	7	31	8	13	19	16	19	29	41	58	30	10	46	45	16	16	20	14	12
CCNB2	-0.627884	0.0456126	5.12303	0.0236104	0.49882	49	0	137	51	36	14	65	44	15	10	10	26	14	35	119	12	8	58	16	7	25	14	19	12	34	18	24	35	101	38	16	27	12	20	28	20	125	29	8	9	8	89	18	27
TMED9	-0.198966	6.86472	5.11966	0.0236562	0.49882	6832	2723	2931	3067	3372	3035	4024	2482	2060	2498	4507	4050	2956	3509	3720	2954	4043	2992	3756	1217	2932	2635	2993	3667	3079	2167	3894	1826	3258	2841	2725	2690	2248	3473	3558	2526	1796	4054	2837	2803	2420	3472	2612	2505
SLC25A28	0.187947	3.77018	5.11853	0.0236717	0.49882	243	194	275	421	354	316	319	338	245	363	354	301	339	365	359	236	479	419	384	179	311	261	232	219	213	242	356	399	396	316	360	311	310	395	232	334	284	336	265	312	193	275	332	395
ZFP36	0.318569	4.58325	5.11712	0.0236908	0.49882	355	381	498	747	559	356	503	490	373	461	389	210	506	509	555	310	874	456	873	403	426	399	311	554	240	227	526	431	663	421	336	715	395	591	449	413	355	424	612	510	528	286	706	509
FHDC1	0.28674	2.95166	5.1146	0.0237253	0.49882	146	143	208	289	184	71	175	211	62	134	168	163	131	110	131	160	291	81	263	115	303	106	113	105	137	104	171	133	215	168	192	257	177	304	204	119	154	187	61	119	101	118	201	217
CDCA2	-0.865008	-0.769183	5.11358	0.0237393	0.49882	5	0	38	2	0	14	22	0	1	25	50	0	8	13	53	9	13	95	21	17	0	0	17	32	12	2	22	39	34	1	9	6	23	20	10	4	51	26	7	16	3	45	7	24
C19orf33	-0.595825	2.04737	5.09978	0.0239289	0.502113	245	313	239	41	44	84	189	196	35	166	147	54	71	121	165	101	24	53	117	135	151	70	116	61	100	32	71	20	195	65	45	114	80	743	173	187	43	498	113	99	147	55	145	36
MATN2	-0.329733	3.91137	5.08548	0.024127	0.505576	538	230	413	373	290	311	573	488	346	409	456	278	294	385	293	307	374	714	272	384	434	346	577	183	169	115	175	417	511	285	326	243	425	728	255	560	362	626	423	490	287	542	514	460
NIPSNAP1	-0.409727	4.33933	5.07767	0.0242359	0.506904	593	362	425	275	396	305	429	388	150	213	320	379	310	408	538	185	327	607	348	198	404	367	326	546	651	627	241	488	492	179	367	199	338	378	453	347	379	697	350	464	390	723	374	486
THNSL1	-0.339128	4.02067	5.07619	0.0242566	0.506904	440	474	571	805	551	324	381	467	188	440	375	424	279	422	519	247	682	286	680	232	151	538	336	473	542	737	347	809	576	270	502	432	571	540	188	519	505	345	288	660	630	566	693	767
TYROBP	0.478307	2.52928	5.07044	0.0243372	0.507894	92	190	185	203	156	84	123	217	63	82	83	98	108	151	306	248	284	282	192	59	55	167	72	92	403	112	73	162	423	124	190	141	140	175	64	70	165	90	166	65	146	185	129	87
ITSN2	0.162933	6.04855	5.06128	0.0244662	0.509889	1226	1277	1396	1675	1606	1610	1678	2045	1743	1443	1699	1507	1661	1690	2465	1657	1886	1385	2043	961	1650	1111	1566	1502	1389	975	1449	1314	1739	1528	1497	1350	1423	1862	2057	1743	1492	1589	1760	1435	1518	1690	1502	1604
CRP	0.710784	7.90645	5.05835	0.0245075	0.510056	5045	3293	4923	1584	4803	10312	5915	6045	603	550	2639	1196	31387	8743	6617	10368	3619	1045	2328	791	1108	1070	3556	15469	11229	2395	4862	4080	4791	5406	6224	1109	831	811	6151	1205	1773	4685	8828	2690	2291	4435	710	3211
NEXMIF	-0.484165	3.11304	5.05397	0.0245696	0.510376	94	80	173	378	239	75	155	177	230	129	87	601	159	233	368	108	310	232	281	100	49	99	81	47	152	247	83	433	215	103	164	185	212	229	46	226	246	272	109	319	128	365	291	412
GLE1	-0.181913	5.03853	5.05209	0.0245963	0.510376	1379	1500	720	791	900	637	893	689	486	791	885	864	620	838	792	694	868	734	1389	563	641	756	742	640	1184	1583	671	996	968	719	823	1006	888	998	944	631	841	1019	938	878	800	985	1160	1085
S100P	1.00375	0.467909	5.05021	0.0246229	0.510376	78	276	20	1	1	29	97	8	0	7	28	5	5	22	2	3	6	3	3	14	63	1	129	15	26	12	2	0	63	4	7	4	3	58	37	15	36	216	45	0	7	6	1	11
LRP1	0.838065	4.97266	5.03892	0.0247839	0.513016	146	182	492	354	178	111	265	152	92	118	149	163	144	285	243	145	405	707	353	205	131	260	223	276	151	201	122	316	564	163	202	124	263	262	79	128	233	240	371	232	146	318	203	312
GSPT2	-0.191848	3.54775	5.03276	0.0248723	0.513778	308	239	293	483	375	225	219	316	286	237	289	326	253	328	309	177	409	248	505	186	235	258	240	256	336	526	189	325	352	159	210	329	236	379	209	272	282	315	330	455	205	451	514	387
DNMBP	0.319199	4.58686	5.03167	0.0248879	0.513778	672	969	371	271	497	769	630	446	415	596	565	437	819	322	517	542	473	498	827	485	347	385	355	658	679	355	1013	311	516	815	561	646	252	486	623	591	306	513	614	317	428	409	452	326
EPM2A	0.275113	2.35605	5.02913	0.0249244	0.513781	128	131	147	177	134	55	55	158	92	64	89	101	93	116	155	73	153	134	153	95	43	144	79	111	107	148	55	128	152	76	117	120	145	136	47	111	170	100	88	163	89	138	140	192
GLB1L3	0.663308	-0.147002	5.02262	0.0250183	0.513781	4	25	27	2	28	1	0	14	9	16	10	33	1	22	12	6	29	9	16	9	5	12	5	12	23	48	2	35	23	6	36	23	14	3	2	19	31	13	12	22	33	5	19	18
SATL1	-0.263419	1.51502	5.0216	0.0250331	0.513781	113	64	96	101	72	75	118	89	71	71	72	73	75	85	132	69	117	60	92	46	62	60	39	57	53	117	46	96	86	56	67	59	86	89	88	86	64	60	81	75	86	99	102	119
VSIG4	0.897753	1.89341	5.01567	0.025119	0.513781	46	72	519	67	41	22	73	237	18	0	30	0	96	102	283	13	92	94	33	26	9	4	44	157	998	23	35	31	189	76	22	7	53	45	93	11	37	63	22	26	5	102	17	116
GAS7	0.553231	2.19608	5.01504	0.0251281	0.513781	12	84	100	172	91	24	67	49	48	39	41	33	40	31	116	53	79	107	89	70	31	93	54	51	84	113	59	119	204	49	113	75	88	86	40	50	48	144	114	69	66	53	134	49
RUBCNL	0.483058	-0.173296	5.01293	0.0251587	0.513781	13	21	2	15	8	25	31	30	31	43	7	21	29	22	26	23	16	10	10	22	1	17	11	17	14	14	10	4	28	28	19	51	16	22	18	14	16	27	29	36	18	21	10	16
SYNE2	0.246202	7.18152	5.01119	0.025184	0.513781	1261	1847	2319	5391	3489	3053	3358	4524	2984	2695	2752	3479	2280	3357	4540	2620	4896	2808	3155	2110	2490	1827	2769	2674	2617	2381	2754	3789	3226	2105	3118	2093	3030	4152	3146	4515	4291	5188	4459	4545	2478	3793	2727	6726
PMCH	0.551321	-0.238916	5.01081	0.0251896	0.513781	18	21	18	8	21	31	14	37	11	26	38	24	36	19	17	24	13	21	16	13	15	14	20	25	19	20	17	36	20	16	24	31	18	21	21	18	14	14	23	15	34	18	29	15
MTUS1	0.295238	8.17657	5.01076	0.0251903	0.513781	5069	8619	7775	13087	13512	10767	8069	7537	6026	7878	7696	11091	8841	8150	8576	6032	12654	3202	7696	4587	5623	4362	4820	6183	8323	11267	6351	4501	6559	7643	4233	7280	4644	4502	6364	7511	5661	6311	9768	9746	7350	7933	9017	8026
C6	-0.788083	3.27217	5.00545	0.0252677	0.514673	151	70	153	51	191	177	379	222	93	109	45	98	104	866	504	77	42	99	45	101	284	64	200	557	133	49	159	118	291	64	69	34	68	72	375	91	164	496	109	21	132	1035	181	104
LYPD6B	-0.644705	2.74189	4.99439	0.0254296	0.516729	273	199	166	55	109	223	509	286	17	105	166	178	63	795	856	83	44	120	81	46	336	55	205	383	215	46	165	47	459	49	84	76	89	244	400	171	93	461	83	59	69	565	138	48
SLC18A2	-0.301919	4.95593	4.99061	0.0254853	0.516729	979	842	618	1072	1328	586	825	750	587	444	615	1156	628	995	1011	449	967	620	1354	820	842	504	585	898	1610	844	627	610	773	907	563	701	844	838	591	693	701	671	711	790	615	715	1047	1045
ACOT7	-0.314697	2.54205	4.98698	0.0255387	0.516729	274	268	164	171	141	108	162	78	84	95	91	123	82	148	147	99	185	144	118	118	159	141	188	139	267	305	102	175	265	106	39	102	174	128	103	110	116	186	166	143	140	213	197	162
ADH5	-0.244495	6.45063	4.98609	0.0255519	0.516729	3091	2469	2872	2510	1995	2493	3089	2344	1715	2161	2816	2223	2770	3203	3208	2216	2869	2332	2727	1259	2641	2017	2306	3352	2803	2186	2090	2655	3208	1975	2103	2058	2519	2598	3359	2430	2461	2953	2449	2103	3527	2943	2810	2559
UCN2	0.703754	-0.414399	4.98293	0.0255986	0.516729	3	28	10	13	20	7	12	9	0	6	1	12	6	3	1	10	73	9	15	4	1	9	9	8	7	6	18	8	19	8	22	14	11	10	2	3	7	5	8	11	8	2	8	12
SPINK2	-0.847218	-0.208591	4.98268	0.0256023	0.516729	30	26	18	170	73	2	17	34	18	21	22	62	10	43	37	15	43	17	23	8	9	3	1	5	45	33	5	30	18	17	22	27	32	66	5	17	66	37	28	14	22	10	14	44
EML6	-0.211215	6.51474	4.98249	0.025605	0.516729	2381	2037	3158	3569	2633	1574	2979	2522	2095	2503	2106	2965	1852	3035	3285	1713	4067	2212	2935	1848	2250	1976	1792	2435	2004	2516	1568	3450	3571	1655	1782	2132	2718	2930	2000	2922	2898	2826	2535	2315	2593	2783	2882	3477
XPR1	0.199713	6.54862	4.96982	0.0257934	0.519843	1688	2067	1590	3472	3262	2393	2226	2107	1730	2066	2264	2793	1847	2057	2275	1486	3550	1430	3236	1147	1478	1554	1338	2077	2862	2619	1902	1318	2058	1912	1869	2483	1486	1916	1593	1913	1939	2410	2250	3437	1908	2728	2756	3152
SPAG16	-0.331942	5.27279	4.95395	0.0260312	0.523946	877	841	1128	2522	1650	664	1131	1294	807	990	953	1506	809	1311	1561	680	1873	1251	1467	755	743	915	802	919	1087	1775	721	1907	1381	486	796	1005	1553	1215	545	952	1514	1256	855	1357	1231	1336	1553	1848
AK1	-0.264116	5.39212	4.95139	0.0260696	0.52403	2515	2386	1290	1456	1251	704	1243	1107	734	1121	917	1365	801	1678	885	906	1675	1881	1300	727	1063	1065	1146	1373	2094	1557	1026	1045	1453	645	713	782	967	1119	1075	829	752	1477	709	1257	1129	1683	1365	1162
RNF183	-0.666767	0.227492	4.9464	0.0261451	0.524747	5	12	20	64	44	4	72	8	12	24	35	38	2	22	92	5	30	17	56	7	69	6	10	18	55	40	3	97	34	16	31	15	53	41	7	11	37	21	11	35	2	5	31	25
GCKR	0.396712	3.51199	4.94332	0.0261917	0.524747	375	573	216	107	121	353	258	402	225	217	375	150	330	234	291	192	173	284	323	142	229	205	270	414	562	153	413	62	216	296	311	331	120	292	455	147	77	278	217	125	219	207	135	146
PCDH20	-0.623377	2.22999	4.94111	0.0262253	0.524747	70	138	99	216	66	18	107	51	52	35	75	183	93	190	93	5	105	102	257	178	43	62	61	100	131	271	73	403	394	57	36	75	302	106	11	70	285	31	143	142	215	146	272	310
PTCHD4	0.544789	2.17374	4.93893	0.0262583	0.524747	61	123	53	205	69	14	48	73	8	93	48	154	50	62	41	49	284	84	139	86	39	104	42	35	117	291	3	136	137	15	38	22	88	126	10	158	122	114	140	238	115	117	92	403
PRR15L	-0.398481	5.0286	4.93563	0.0263084	0.524747	1601	1532	896	939	839	625	1733	1099	553	506	1213	776	1033	1663	1930	989	657	447	792	399	700	408	663	2322	1129	564	526	945	1087	323	744	431	599	970	1461	756	635	2113	532	380	1034	1687	891	612
SDR16C5	0.633785	1.64328	4.93546	0.0263111	0.524747	129	167	74	127	56	104	35	61	56	133	49	148	35	116	42	45	171	39	143	51	35	74	19	16	94	120	36	41	100	103	86	108	34	139	35	104	57	80	47	65	175	119	134	37
RCN3	0.795074	1.66534	4.93265	0.0263539	0.524917	15	33	82	52	40	17	37	9	8	19	39	19	17	9	38	40	108	92	51	29	0	63	17	18	13	21	9	37	97	18	38	25	19	44	1	3	35	15	24	22	40	49	30	25
SLC39A9	-0.202114	6.94946	4.92801	0.0264248	0.525644	3808	3937	3467	4628	4035	2463	3381	3494	2521	2793	3013	4820	3103	4831	4497	2001	5306	2731	4908	2096	2331	2894	2651	3218	4602	5181	2339	4444	3486	2612	2770	3125	3163	3338	3053	3478	3287	3494	3081	4246	3996	4194	4804	4261
DDX31	-0.179816	4.02368	4.92249	0.0265092	0.526638	491	489	289	586	480	361	405	404	287	437	469	539	504	411	337	269	676	415	680	279	284	406	255	297	373	583	267	493	361	415	501	435	385	510	265	320	413	418	489	547	304	401	636	577
PTPN3	-0.189725	5.84099	4.92014	0.0265453	0.526672	1860	1386	1097	1794	1327	1194	1451	1315	934	1182	1084	1876	983	1359	1059	799	1496	1799	2301	980	1024	1171	1271	1025	1228	1659	903	1771	1572	1162	1442	1682	1665	1589	932	1377	1687	1461	1074	1664	780	1434	1344	1901
ZNF610	-0.410528	1.33335	4.91097	0.0266866	0.527681	48	44	98	106	36	22	78	56	6	58	44	11	64	46	53	37	113	81	72	33	51	92	45	62	49	112	48	87	88	58	59	56	114	62	90	61	91	49	48	63	49	80	46	143
NTHL1	-0.320483	1.55353	4.90974	0.0267056	0.527681	101	189	105	94	60	42	84	53	40	87	76	35	59	118	99	72	109	65	63	62	30	40	80	30	97	74	36	114	96	42	46	62	66	62	50	63	60	89	55	57	59	70	49	98
CCDC71L	0.316396	3.50912	4.90624	0.0267599	0.527681	284	191	303	182	159	176	256	220	182	210	247	222	310	192	355	291	360	227	275	159	191	178	144	264	192	102	201	112	318	351	151	260	155	253	175	207	211	259	286	143	192	257	212	167
MACF1	0.190163	8.02733	4.90547	0.0267717	0.527681	4828	4677	4318	6260	6223	5408	6722	6045	5617	5457	6499	6348	5190	5553	6709	4923	6529	7142	7765	5077	5070	4105	6038	5086	4414	3970	5162	5165	6674	5452	4980	6382	5185	6402	5917	7249	5465	7709	7042	7114	4854	6528	7383	7496
ARCN1	-0.150471	7.48869	4.90419	0.0267916	0.527681	6165	6311	3709	5020	4950	3385	3569	3715	2960	3529	4665	5780	3802	4612	4563	3047	7027	4233	6747	3231	3147	4113	3774	4490	6351	7146	4038	5546	5023	4378	4171	5060	5113	5185	4302	4678	4511	5180	4509	5702	3948	5524	6396	6209
DHRS4	-0.241315	2.96291	4.90344	0.0268032	0.527681	174	224	139	258	270	153	165	141	129	166	210	240	131	233	218	170	170	208	300	147	181	194	219	174	321	309	175	201	168	91	140	170	180	171	106	130	164	186	171	169	147	263	192	173
ANKRD23	-0.640783	2.28379	4.89947	0.026865	0.527868	45	27	69	342	200	26	59	34	34	55	45	320	39	76	43	60	333	137	53	64	28	57	60	35	25	120	24	355	139	51	79	50	121	204	18	71	152	50	44	104	40	87	75	208
CDH2	-0.356647	4.28588	4.89673	0.0269076	0.527868	1104	617	596	938	299	365	392	737	368	486	311	400	236	776	467	457	880	472	557	510	531	339	848	267	373	338	120	1042	595	383	228	162	805	961	502	806	712	825	482	432	260	622	342	544
STIL	0.324107	1.5222	4.89618	0.0269162	0.527868	76	77	46	81	72	35	103	91	20	49	52	58	40	43	150	25	61	86	62	47	59	35	26	103	73	56	46	49	99	40	66	54	57	53	60	45	68	106	28	30	42	87	65	46
ALDH6A1	-0.31005	4.18975	4.89127	0.0269928	0.528647	435	428	560	426	414	420	555	580	298	390	515	360	386	1041	913	367	464	603	523	346	526	419	442	877	757	599	342	679	637	313	458	334	595	438	554	446	521	532	361	349	513	997	437	665
TRUB1	-0.219862	4.93938	4.88921	0.027025	0.528647	664	685	851	1008	887	498	934	930	545	618	753	1076	743	1139	916	560	1320	661	1021	445	642	729	599	883	902	1088	578	1014	888	763	720	784	838	795	1016	925	1180	1044	1090	1179	1191	1013	974	1392
PCYOX1	-0.227621	6.24239	4.87863	0.0271911	0.531217	2436	2056	2045	2918	1782	1172	1806	1675	1060	1295	1121	1616	1305	2789	2044	1121	2361	1834	2453	1097	1448	1380	1651	2749	2968	3452	1264	2617	2754	1361	1460	1433	2235	1832	1858	1670	2876	3229	1930	1967	1248	3114	1934	2836
SYNE3	0.655655	-0.308133	4.86941	0.0273369	0.533056	1	4	13	22	6	11	12	0	16	9	22	8	6	1	4	10	5	23	14	3	2	14	21	3	16	8	10	19	12	12	24	6	11	7	8	9	8	6	11	32	10	11	28	5
EXTL1	0.524291	-1.18877	4.86627	0.0273866	0.533056	12	7	14	44	29	5	7	2	0	7	6	3	7	8	7	7	23	6	13	3	2	1	3	7	6	6	4	7	6	2	5	9	3	9	2	4	4	4	0	11	3	11	3	5
CEMIP	0.63797	1.50209	4.86351	0.0274305	0.533056	52	73	35	46	33	14	30	33	30	17	26	24	15	14	17	23	187	51	42	25	11	23	18	22	46	11	27	50	49	27	35	72	51	24	1	17	33	39	26	29	28	25	48	47
TRIM2	-0.213053	6.21435	4.86317	0.0274359	0.533056	1199	1699	2282	3464	2866	1402	1946	2045	1673	1213	1890	3136	1784	3124	3354	1326	2814	1785	2111	1134	1194	1461	1408	1619	2123	2826	1359	2773	2318	974	1344	1519	1844	2150	1318	1861	2392	2094	1856	2033	2022	2269	2532	2979
NUDT6	0.26917	1.85216	4.8598	0.0274895	0.533056	102	93	56	94	50	79	67	126	103	76	79	68	61	43	78	69	197	117	142	56	85	52	59	61	48	73	81	78	54	104	88	105	60	119	88	92	73	96	92	122	89	71	141	64
PECR	-0.296956	2.98181	4.8593	0.0274975	0.533056	299	328	295	248	173	118	331	211	113	124	98	129	187	337	265	97	261	199	189	119	176	116	161	464	375	282	119	257	365	164	162	150	279	381	165	196	279	376	167	110	165	314	126	302
TMEM132E	1.00265	-1.11263	4.85622	0.0275467	0.533056	4	4	4	0	6	0	10	6	6	0	4	10	3	4	0	0	15	4	2	21	0	2	3	0	1	11	0	0	8	0	1	5	10	3	4	4	7	0	0	17	4	18	8	10
DIXDC1	-0.197719	4.19482	4.85263	0.027604	0.533056	583	566	345	715	529	484	396	449	276	487	349	599	351	523	566	289	603	681	617	277	383	352	274	398	529	751	260	904	543	355	346	425	401	543	376	450	566	449	382	591	326	532	595	793
CFAP418	-0.377035	2.91783	4.84934	0.0276567	0.533056	135	171	348	446	387	213	131	389	59	143	163	233	190	275	456	186	423	191	280	154	147	145	72	171	250	400	177	313	316	165	142	220	223	261	198	272	246	170	234	259	204	185	329	310
TUBGCP5	-0.261298	3.7909	4.8469	0.0276958	0.533056	290	265	238	637	528	170	208	244	193	157	243	467	346	299	378	227	359	687	756	276	371	345	470	390	439	595	308	493	293	180	171	382	263	296	177	257	377	413	298	503	223	548	363	680
OIP5	-0.491594	-1.10967	4.84233	0.0277694	0.533056	7	5	5	8	7	6	5	22	26	3	16	3	10	19	34	13	13	8	8	14	19	5	12	4	22	7	15	31	23	10	4	2	13	12	20	10	9	10	6	12	7	30	15	6
GATD3	-0.203856	4.20979	4.84192	0.027776	0.533056	530	330	390	566	568	401	464	423	300	395	405	704	566	627	562	396	574	752	898	366	362	395	380	526	363	531	293	410	561	228	353	349	394	326	352	413	353	607	531	596	350	639	394	469
COQ5	-0.212541	4.68999	4.83668	0.0278605	0.533056	756	1072	730	838	766	542	625	510	358	420	775	746	709	978	877	556	816	536	794	338	611	570	605	791	979	1174	709	805	959	511	597	641	687	771	757	569	598	718	631	679	900	968	866	802
C7orf25	-0.192617	3.67339	4.83432	0.0278986	0.533056	288	332	352	432	355	244	416	253	147	315	376	267	329	503	528	219	460	339	370	221	345	295	339	379	443	427	289	384	377	217	276	167	330	307	351	286	347	412	372	373	290	450	377	453
DDR2	0.436381	3.91679	4.83241	0.0279295	0.533056	122	486	454	906	457	112	399	231	84	194	243	233	366	340	459	307	1460	578	441	217	42	467	250	243	414	575	308	403	563	393	373	388	350	399	69	187	361	194	464	447	439	446	453	477
SSH1	0.244868	5.14964	4.82648	0.0280259	0.533056	802	849	680	932	836	457	597	655	579	671	760	628	574	737	677	542	1417	732	998	555	390	550	683	631	522	637	681	678	959	831	662	683	647	960	459	653	605	862	796	822	465	780	810	1016
GLI3	0.456295	2.09385	4.82564	0.0280394	0.533056	48	110	263	156	140	52	113	58	75	78	74	74	46	228	66	52	221	182	99	72	4	147	29	61	55	162	65	96	194	53	39	112	142	64	14	66	150	31	110	79	97	91	161	174
ZBED6	0.349805	3.70709	4.82455	0.0280572	0.533056	184	233	152	401	173	239	330	318	280	174	226	390	239	335	332	206	475	303	546	222	212	168	141	288	198	166	96	183	177	175	190	234	168	208	194	340	294	313	246	375	184	292	390	424
A1BG	-0.542029	2.13008	4.82157	0.0281058	0.533056	83	103	110	286	275	13	38	74	42	49	36	271	47	63	89	51	244	231	328	91	37	217	36	45	89	333	29	173	80	34	76	82	141	152	6	52	102	91	138	293	113	167	152	210
RWDD2A	-0.26891	4.28713	4.82136	0.0281091	0.533056	595	425	432	752	689	522	585	583	403	529	717	693	465	594	921	453	965	345	524	297	525	439	400	602	622	660	361	567	555	488	403	411	567	627	711	555	511	683	534	523	831	628	582	666
TBC1D4	-0.262192	4.76831	4.81916	0.0281451	0.533056	529	359	638	871	855	460	615	597	543	551	511	803	557	846	773	332	693	678	549	453	387	322	504	562	505	385	392	1012	878	411	511	538	694	892	543	568	830	692	460	726	453	947	600	1028
TPST1	0.274532	4.156	4.81855	0.028155	0.533056	255	386	493	516	447	391	358	316	283	243	294	513	330	341	809	409	699	362	334	243	223	267	331	234	279	201	436	369	618	309	253	238	283	410	303	220	273	276	479	323	271	328	309	378
DGCR6	-0.372794	0.863348	4.81414	0.0282271	0.533056	52	65	50	69	41	37	45	31	9	33	29	33	26	58	58	24	39	74	33	26	24	36	43	25	53	66	27	40	28	15	23	41	37	20	22	26	28	44	25	19	32	47	52	58
INHBB	0.750548	-1.00122	4.81363	0.0282355	0.533056	4	7	11	13	22	1	19	6	9	3	4	2	2	0	4	10	11	3	6	0	0	7	5	2	2	10	7	3	10	0	4	7	9	27	1	3	11	7	0	3	7	2	1	2
PI15	0.74249	4.54884	4.81308	0.0282445	0.533056	496	1601	387	1404	1229	112	225	281	397	128	361	260	1102	120	356	202	4914	426	1094	306	34	1334	74	392	658	1707	817	135	148	433	600	353	194	404	30	146	174	79	489	618	682	336	743	903
ZNF66	0.385542	2.19843	4.81129	0.0282739	0.533056	84	124	103	170	128	125	137	193	87	85	92	74	151	110	116	198	120	119	193	75	43	98	100	117	107	157	148	117	142	172	133	133	173	128	86	75	94	85	155	88	111	96	62	129
WNT2	1.11221	-1.37125	4.80873	0.0283159	0.533056	5	15	14	0	19	2	6	0	0	10	0	0	0	1	0	3	9	0	0	8	0	5	0	21	4	3	6	4	21	24	1	12	0	0	0	12	0	1	13	20	28	9	7	21
RTL1	-0.933052	-1.05887	4.80817	0.0283251	0.533056	2	14	7	34	74	2	14	10	10	2	9	0	3	4	1	6	41	9	14	1	1	10	0	1	2	15	8	16	13	1	22	13	11	10	1	3	18	0	5	26	10	0	2	29
PLD1	-0.426616	4.13276	4.80547	0.0283695	0.533056	550	535	495	311	283	261	696	487	197	229	258	267	351	615	521	158	483	341	393	202	448	212	373	883	545	197	153	208	415	159	204	184	230	422	658	346	386	956	281	228	243	960	213	461
SAYSD1	-0.166926	4.12087	4.80524	0.0283732	0.533056	447	404	460	702	541	347	545	439	220	365	485	628	458	572	682	376	510	298	623	300	273	328	380	434	432	530	250	445	503	277	339	381	334	454	334	335	400	589	384	441	348	525	411	533
FBXO4	-0.173484	4.45746	4.80224	0.0284228	0.533056	657	413	452	676	643	612	630	677	477	681	625	598	566	573	654	555	648	571	836	433	503	513	586	836	810	637	513	455	445	373	554	630	393	513	444	522	463	703	546	721	600	785	687	656
NAP1L4	-0.159835	5.71971	4.8019	0.0284284	0.533056	1771	1876	1048	1417	1073	1128	1220	1084	976	1138	1475	1547	844	889	1228	941	1535	1236	1461	744	1206	1137	838	1187	1665	1715	1000	1188	1360	994	1178	1344	1229	1478	1197	1204	1172	1640	1126	1420	1411	1423	1385	1363
FOXF2	0.600448	0.358382	4.80149	0.0284352	0.533056	6	30	49	55	16	7	34	12	6	6	21	23	29	16	43	13	49	40	15	11	1	56	6	22	29	28	11	22	33	15	16	15	36	31	0	11	11	15	34	14	32	13	24	37
GANC	-0.166131	3.72618	4.79328	0.028571	0.533699	303	507	323	463	356	269	299	360	175	337	300	367	215	528	555	356	389	398	344	157	294	312	257	380	502	458	300	314	320	221	278	280	288	350	337	306	335	411	267	392	318	418	358	468
RAI14	0.223725	5.98797	4.79244	0.0285848	0.533699	1895	1540	1409	2104	1422	1073	1734	1216	1620	1301	1842	1679	1522	1220	1739	1018	2217	1835	2236	1177	1685	1382	1276	1676	1684	1582	1662	1056	1470	1678	1732	1958	1121	1870	1375	1580	1062	2106	2351	1987	1939	1713	1980	1836
BCL11B	0.68784	-1.46729	4.79183	0.0285951	0.533699	0	4	7	3	13	4	10	0	2	0	5	0	10	5	19	5	2	8	13	6	11	0	0	6	5	14	0	3	8	9	18	7	13	23	2	0	12	21	11	9	1	0	6	12
GAS2L3	-0.587985	1.47433	4.79098	0.0286091	0.533699	110	52	103	46	46	8	38	71	37	69	37	29	34	77	79	20	23	48	46	28	35	22	49	168	83	34	19	43	81	27	28	47	40	59	119	51	69	119	56	37	99	82	25	103
SERPING1	0.475049	8.44859	4.78879	0.0286456	0.533729	10413	11893	9073	4445	5216	9346	7702	13152	4284	5927	7467	4061	14754	12025	13314	11997	10311	7733	6475	3038	6045	4562	8140	22155	21945	3557	6463	2976	6652	8524	6100	5526	4138	7129	16915	5028	5073	12784	13544	2569	4802	12293	4040	5444
YIF1A	-0.272033	5.25302	4.78542	0.0287016	0.534123	957	1243	734	1652	1691	574	692	631	676	652	966	1750	659	933	726	702	1507	2099	2105	1042	690	1219	1123	856	878	1645	703	1084	652	476	668	1093	808	921	311	506	567	1099	1174	1683	671	1408	1008	1055
LMAN2L	-0.248017	4.57812	4.77535	0.02887	0.535633	1085	970	700	649	590	587	512	593	486	479	784	599	546	480	537	469	866	381	722	260	528	616	533	597	1069	1174	764	602	767	569	613	853	588	754	680	633	417	924	570	644	775	821	904	794
HLA-E	0.241793	8.56815	4.77317	0.0289065	0.535633	17256	22208	8127	9740	11789	9709	8768	7189	4717	7270	8760	8410	7089	8553	7885	6625	11625	6857	19212	4163	7079	8291	5537	7021	18009	15595	7929	5007	8482	6322	6709	13272	9276	6698	6592	6821	5999	7902	6548	7507	8792	6937	11261	5736
KCNH8	0.410935	1.8851	4.77204	0.0289255	0.535633	37	20	75	137	31	90	119	103	51	73	99	90	18	119	131	32	87	37	75	54	95	33	97	38	58	32	86	26	104	51	110	34	88	57	18	63	42	51	79	29	122	106	35	54
ALDH7A1	-0.259266	5.1409	4.77123	0.0289391	0.535633	1069	856	1460	896	822	949	1250	1001	678	764	1155	671	948	1765	1628	848	1035	1031	783	575	566	584	1034	1739	1343	1321	641	1046	1473	552	753	462	793	728	1580	856	1170	1461	915	648	662	1513	831	1221
LRRC15	0.913119	0.420128	4.7687	0.0289817	0.535633	3	41	7	165	0	0	26	4	1	1	25	11	8	20	0	24	83	44	89	7	0	137	14	5	25	28	30	21	30	37	90	80	11	19	0	5	17	5	14	58	29	50	71	10
DISP1	-0.189105	3.24897	4.76804	0.0289929	0.535633	291	302	187	435	301	178	198	183	211	251	232	294	258	250	262	109	384	211	321	130	228	161	112	222	293	439	188	305	230	171	207	196	220	269	162	244	237	243	195	280	140	285	335	328
LIMS1	0.243262	6.41825	4.76106	0.0291106	0.53716	2407	2657	1754	2849	2914	2341	1963	2033	1712	1366	2405	3058	2105	1675	2469	2809	3690	2221	2938	1608	1281	1710	1462	1214	2529	2427	2440	1835	2841	2320	2431	2012	1521	2466	1557	1805	2042	2302	3217	2946	2249	2351	2194	2306
CCR1	0.554064	1.51994	4.75392	0.0292317	0.537332	38	111	111	75	40	51	44	107	23	9	34	60	67	30	102	105	168	155	24	34	3	88	29	39	171	89	62	61	153	60	100	126	51	76	6	43	87	36	72	52	57	151	53	36
ARL15	-0.237877	4.57211	4.75319	0.0292441	0.537332	555	628	830	924	835	506	705	588	461	567	484	929	308	791	1102	290	953	420	937	370	306	477	320	550	626	1011	364	803	671	356	480	588	732	626	380	646	904	719	619	736	812	789	1054	1093
BEST3	-0.616951	2.33054	4.75233	0.0292587	0.537332	83	121	167	385	308	51	43	185	65	142	52	266	78	135	184	72	252	39	136	19	17	51	33	46	105	317	74	431	146	100	141	133	150	175	11	81	226	231	138	365	86	149	378	470
FAM124A	0.412638	0.846706	4.75222	0.0292605	0.537332	32	22	44	52	44	28	74	16	14	47	30	36	9	30	64	18	32	29	34	44	77	19	21	49	37	17	25	9	33	31	41	50	13	38	45	43	10	79	31	9	65	33	49	19
CRYBG2	-0.721212	0.223969	4.74839	0.0293257	0.537884	29	41	13	3	7	32	44	8	11	30	31	8	14	13	20	9	5	26	30	3	80	0	43	62	27	14	9	8	12	6	7	12	28	50	21	17	27	26	8	13	44	12	13	3
SRGN	0.455287	3.26008	4.7435	0.0294092	0.538769	125	277	280	548	253	151	150	161	106	140	221	369	306	117	342	352	651	201	526	149	26	400	77	161	299	268	171	316	272	261	323	396	119	297	90	139	192	152	249	289	444	248	263	159
SAMD5	0.505985	3.54294	4.73852	0.0294945	0.539513	270	394	275	666	659	57	133	180	80	87	53	294	178	261	171	36	725	105	316	166	56	159	72	168	217	512	127	182	466	153	116	290	405	153	54	161	384	109	273	331	287	176	283	402
PTN	-0.645992	-0.453003	4.73283	0.0295922	0.539513	3	3	48	56	18	7	7	8	0	7	13	33	9	15	98	15	37	48	30	14	2	49	15	8	11	45	0	46	17	23	22	22	25	16	2	11	57	4	16	33	21	44	2	13
ID3	-0.39287	6.1096	4.73268	0.0295947	0.539513	3140	2825	1319	1271	1666	1819	2591	2071	1603	1736	2273	2225	1275	1529	1681	2006	1319	2896	3658	1399	2725	2324	2240	3644	2656	3190	2178	2523	1853	1203	1882	1504	2274	1969	1994	1404	2258	2954	1951	2395	1414	2532	1791	2710
GALNT14	-0.471192	3.20211	4.73092	0.0296251	0.539513	210	316	241	316	371	136	122	160	195	164	126	283	220	182	211	125	296	258	394	143	76	120	160	113	215	606	153	563	339	132	380	192	317	647	80	286	412	487	198	411	173	277	508	483
SPHKAP	1.06434	-1.04246	4.73057	0.0296311	0.539513	1	2	12	27	2	0	2	2	0	0	0	17	0	10	0	10	5	9	0	11	0	6	24	8	2	0	0	67	0	1	4	3	10	0	0	38	1	22	2	20	14	4	10	36
RBMS1	0.239242	4.92777	4.72815	0.0296728	0.539513	840	614	885	803	778	802	944	757	832	658	897	669	705	683	1341	832	1189	769	988	607	756	731	618	680	481	476	824	517	1084	766	804	916	550	937	900	595	616	571	763	999	803	710	952	651
PDPN	0.548316	1.77919	4.72676	0.0296967	0.539513	31	152	63	280	79	28	65	60	22	7	24	52	62	22	16	85	270	181	147	40	2	149	73	88	109	177	18	55	243	117	95	198	73	154	15	30	42	61	102	28	64	42	106	52
SSC5D	0.933873	2.34954	4.72366	0.0297504	0.539848	16	27	55	147	42	2	28	15	42	30	8	32	18	22	51	26	103	99	93	45	0	26	16	29	30	72	9	132	105	29	46	25	84	53	5	13	115	13	13	20	21	22	39	36
CLTC	-0.121629	8.45225	4.7197	0.0298189	0.54045	8672	8862	8645	11439	8961	6608	9459	8737	6907	7362	7667	10465	7240	9506	10637	5816	12288	7469	13227	6379	6803	6256	7268	8993	9269	10746	6220	8931	10281	6272	7665	8435	7902	8612	7188	9138	8761	10839	8762	10670	8310	10798	11320	10880
L3MBTL3	0.226485	3.00403	4.71466	0.0299064	0.541395	212	258	214	214	189	142	203	211	155	160	154	171	170	187	252	161	232	190	199	95	173	175	182	131	135	192	250	150	256	152	184	224	142	173	170	199	191	193	168	185	192	197	172	208
EGLN3	-0.665591	3.31423	4.71057	0.0299777	0.542043	235	152	246	55	53	125	566	216	240	111	123	88	128	487	842	108	96	38	252	200	277	64	140	1249	1079	39	49	29	240	108	100	99	104	185	304	161	91	346	119	96	660	202	98	37
BCL6B	0.618905	1.18621	4.70432	0.0300868	0.543374	10	71	81	147	86	10	70	18	13	2	51	92	90	17	57	37	119	36	32	11	8	65	5	11	42	78	89	93	40	35	56	73	27	25	2	18	14	3	36	63	62	23	83	18
PTPRS	-0.295394	5.81766	4.69748	0.0302068	0.544898	1333	1319	2062	2302	1485	940	2001	1615	1101	927	643	1447	1011	2420	2198	779	1965	2838	2638	1681	1202	1105	1113	1651	2022	1669	470	2541	1811	760	1498	1119	1250	1450	774	1691	2813	2424	1442	1602	669	2444	1548	2301
GADD45G	0.630803	2.58468	4.68914	0.0303539	0.546906	27	60	89	119	114	72	50	32	39	48	58	78	81	61	51	55	160	56	178	33	26	95	36	70	35	81	39	79	58	43	46	63	78	23	20	70	90	45	30	93	50	45	118	135
TMLHE	-0.201071	3.32306	4.68598	0.0304096	0.547056	387	204	305	310	277	267	378	287	172	258	262	251	222	380	337	179	285	277	443	190	224	246	218	271	443	293	158	227	311	185	235	223	271	326	277	288	243	416	229	335	276	238	278	306
AGTRAP	0.566775	6.91188	4.68462	0.0304337	0.547056	3468	4670	1600	1861	3625	8391	2773	2692	4076	3489	6111	4346	6033	1672	1733	6182	2676	3261	4508	1623	1530	3057	2569	1895	3282	2660	3384	1721	2221	5442	4697	3186	1644	1916	2487	2011	1111	1594	3818	1716	2182	1828	3887	1305
ZNF559	-0.314931	3.8597	4.68031	0.0305102	0.54756	360	438	783	602	320	400	270	493	275	378	307	509	293	519	492	297	681	303	414	253	230	225	240	439	441	398	248	627	492	351	525	556	387	370	243	624	517	452	455	574	445	455	542	790
CDIN1	-0.289098	2.95305	4.67834	0.0305453	0.54756	171	208	186	263	202	113	243	322	183	247	216	110	219	284	322	184	269	303	227	135	93	199	244	213	208	248	222	220	193	176	235	265	243	237	284	298	210	313	179	249	166	284	283	322
LRP2BP	-0.333888	3.22979	4.677	0.0305691	0.54756	165	161	264	308	273	191	581	234	167	199	219	227	226	250	579	146	240	190	212	140	140	171	132	458	501	238	133	277	212	171	182	214	208	250	179	188	203	209	169	196	1207	209	192	231
TBCK	-0.232984	4.15172	4.67022	0.03069	0.54879	316	677	627	582	552	331	386	617	254	314	376	897	307	546	492	270	548	397	587	193	334	420	257	307	596	506	284	605	487	247	399	370	641	688	255	433	508	376	374	515	501	443	490	770
RIN3	0.808949	0.533243	4.66912	0.0307096	0.54879	11	2	18	20	15	1	13	4	11	2	3	7	14	18	14	7	24	10	26	8	4	10	19	13	12	13	5	9	27	8	5	5	14	4	9	3	9	10	15	15	4	10	10	15
PSG5	-0.789217	1.89331	4.66556	0.0307735	0.54929	241	72	23	68	22	66	77	229	64	3	183	12	68	2	373	148	15	270	33	68	365	38	406	215	56	16	13	24	280	120	325	14	51	110	293	46	71	165	103	21	33	106	4	62
SOAT1	-0.194702	6.49914	4.66181	0.0308406	0.549847	4537	3786	2066	2142	2016	2337	2204	2017	1387	1701	2261	2474	2569	2971	2884	1788	2199	1661	3135	1281	2268	1669	1795	3099	4774	3291	2276	1778	2806	1887	2279	2670	2177	3056	2476	2635	1988	3352	2335	2586	2256	3352	2878	2601
DAB2	0.259428	5.29419	4.65939	0.0308842	0.549983	1597	1500	886	783	675	743	1287	1132	509	701	735	556	938	767	710	794	899	1381	1330	498	825	818	718	1816	885	621	761	480	860	998	922	1333	951	1536	1252	919	640	1442	953	896	765	1282	827	910
C16orf95	-0.41707	-0.198038	4.65544	0.0309553	0.550449	30	13	11	17	34	6	10	4	12	1	11	18	17	26	28	19	50	23	34	2	5	24	21	11	15	21	12	49	13	9	34	17	22	25	25	11	31	15	31	20	10	18	28	43
TMEM144	-0.42029	5.56906	4.6528	0.031003	0.550449	1746	1129	1886	1152	1562	1874	2663	1732	1424	1709	2003	1037	1282	2213	2770	1098	1184	1416	1791	1212	2038	1118	1463	2713	1742	786	1389	1086	1817	1062	1032	1200	1118	1301	2332	1566	1409	1798	1378	1032	1343	1824	1096	1063
BPIFA1	1.23555	0.206495	4.65195	0.0310183	0.550449	16	16	38	9	6	0	16	26	0	1	0	8	26	13	0	0	20	0	399	2	11	15	1	12	238	24	15	8	6	10	26	21	49	11	4	0	38	2	4	18	12	25	18	44
ARHGAP30	0.447088	0.975288	4.64631	0.0311204	0.55162	9	47	23	56	13	30	20	40	7	18	16	40	25	20	45	28	45	68	33	38	48	8	43	44	73	33	34	25	59	24	56	25	45	51	35	31	26	51	20	30	16	37	27	34
UNC5B	0.536604	4.70411	4.63917	0.0312501	0.552789	322	424	448	746	551	233	373	339	209	210	222	606	426	301	420	209	820	537	374	219	119	347	175	200	284	873	196	931	579	203	412	211	509	381	105	342	548	229	366	646	294	452	379	482
SNX5	-0.193972	5.40807	4.63871	0.0312586	0.552789	1258	820	876	1166	1231	1048	1146	1219	913	1222	1429	1273	1000	1188	1282	866	971	1290	1429	982	1433	985	1260	1957	1288	1144	1012	914	887	661	698	1087	650	943	887	845	839	1441	1531	1324	1235	1899	1382	1301
NR2F1	0.507987	0.660916	4.63654	0.031298	0.552847	21	9	36	17	14	32	24	7	62	7	13	30	55	12	34	42	47	50	46	15	4	18	10	75	18	18	16	32	52	22	24	44	20	26	4	34	30	8	49	24	27	40	56	18
ZNF572	-0.353343	1.03272	4.63369	0.0313501	0.553129	36	36	86	59	87	70	18	76	59	68	73	12	75	65	73	56	104	15	182	26	54	41	16	77	42	76	20	59	66	49	28	29	26	66	64	61	58	34	45	75	70	63	43	50
PRRC1	-0.17914	6.55237	4.61625	0.0316705	0.558137	3365	3302	2531	2656	2732	2120	2625	2664	1647	2077	2264	3365	2567	2953	3173	1896	3446	2153	3099	1472	1919	1875	2137	2561	3257	3965	2046	2527	2455	2105	2378	2340	2257	2647	2637	2492	2432	3141	2489	3108	2289	3431	3042	3007
NREP	-0.286005	5.06616	4.61414	0.0317094	0.558181	594	1060	1435	1142	651	608	1029	794	705	537	957	705	813	1006	1792	716	1115	1843	972	624	406	842	600	645	756	1750	730	1971	1505	852	910	526	1001	914	417	692	1342	529	858	935	1660	1599	1150	1102
PTGR2	-0.320496	4.90355	4.6086	0.0318121	0.55888	1333	1203	1226	1192	1163	469	949	806	660	510	616	805	760	1078	948	251	1371	828	1380	451	617	764	486	716	1605	1273	533	1429	1125	593	624	665	1194	1133	554	720	1216	931	930	1092	425	940	1408	1510
CDA	-0.729124	-0.631662	4.60805	0.0318222	0.55888	38	41	47	13	7	18	20	28	22	39	14	14	6	17	5	8	15	20	43	11	19	10	18	13	11	17	5	18	44	50	15	22	14	46	9	6	11	18	45	6	4	23	18	21
TLL1	0.369099	2.10109	4.60349	0.0319069	0.559118	194	65	72	106	102	144	72	243	63	218	90	99	147	37	73	70	89	101	185	65	35	57	42	122	46	55	193	48	80	124	79	127	50	193	90	125	57	84	133	104	81	61	169	78
SLC38A8	0.802503	1.35442	4.60339	0.0319089	0.559118	46	208	55	175	86	11	2	9	12	32	10	28	7	25	10	15	119	40	25	21	1	63	10	22	162	376	43	90	62	3	49	117	88	10	3	32	40	4	96	68	10	46	89	97
STARD9	0.507193	1.13568	4.5963	0.032041	0.560791	30	54	56	116	82	27	13	62	5	31	17	27	43	26	18	28	84	86	29	18	18	45	5	15	43	42	22	48	67	8	40	58	58	50	11	32	43	21	28	18	36	12	28	35
SIRPB1	0.710843	-0.235949	4.59286	0.0321053	0.561274	6	8	7	33	2	7	2	6	5	4	9	7	17	5	7	18	22	17	11	8	12	2	4	7	77	3	16	2	11	8	3	8	5	6	8	5	8	5	8	2	3	9	7	5
PRF1	0.680486	-1.56619	4.584	0.0322718	0.562966	6	0	6	20	0	5	2	8	9	3	13	0	7	12	3	14	19	0	2	9	1	0	0	19	5	4	1	5	3	4	11	2	20	11	1	9	0	12	3	3	12	7	4	2
TNFSF10	0.405159	7.69586	4.58379	0.0322757	0.562966	4996	5783	4700	3070	4086	9450	6585	6581	4486	3160	9192	3879	7328	7428	8863	4851	4437	3382	8390	3110	5328	3879	5874	7650	9931	2538	6630	1813	4366	6103	4515	3476	3770	3856	8207	4026	3623	7202	5993	3310	5317	4954	3174	2980
P4HA3	0.771738	0.127438	4.57382	0.0324642	0.565609	0	14	31	36	18	13	12	9	4	0	12	1	14	18	6	0	85	8	30	11	0	7	17	18	18	16	21	18	53	16	16	6	29	18	0	13	12	10	28	10	10	23	17	9
RAB2A	-0.169994	6.943	4.56969	0.0325424	0.565753	2975	2772	3863	5255	3699	2279	3423	3465	2754	3244	2767	3789	2808	4260	4526	2477	5682	2645	3733	2021	2413	2445	2230	2993	2854	3617	2164	4855	4160	2532	2543	2883	3629	3809	2821	3210	3762	3447	2764	3601	4251	3771	4105	4501
ANKRD28	0.152195	5.40267	4.56786	0.0325773	0.565753	851	852	830	1214	1105	982	1314	1125	749	934	1032	1157	929	1165	1381	872	1359	907	1050	811	806	597	747	1270	719	650	768	843	1177	983	923	1251	771	1129	1021	864	877	1086	1056	1099	977	1072	1128	1222
CASTOR1	-0.280891	1.19005	4.56613	0.0326101	0.565753	116	70	70	51	36	66	54	71	42	48	32	69	52	57	75	40	73	90	84	15	64	56	53	64	104	77	48	56	84	47	37	56	45	90	41	50	56	90	50	53	59	28	47	67
LGALSL	-0.22596	4.21539	4.56507	0.0326304	0.565753	674	431	615	555	528	413	479	506	535	466	552	503	308	586	604	498	593	338	510	492	436	577	441	435	397	567	261	835	739	285	379	446	695	873	473	482	532	588	455	411	423	511	658	396
HOXD8	0.739604	-1.44165	4.56365	0.0326574	0.565753	3	8	9	12	3	0	10	3	1	0	13	2	0	0	4	7	37	20	2	0	0	16	9	0	0	9	14	13	12	6	7	3	12	19	1	2	2	5	4	13	18	11	4	5
C4orf33	-0.305021	4.0257	4.56009	0.0327253	0.565914	518	566	634	665	454	319	547	391	439	461	652	687	278	674	726	399	410	508	316	371	310	501	350	642	507	450	480	589	520	222	298	265	431	328	916	304	434	540	372	458	698	653	543	465
GZMB	0.636207	1.42397	4.55929	0.0327407	0.565914	39	188	160	141	37	106	31	46	34	28	85	36	90	81	74	130	87	59	223	37	12	88	53	48	122	72	58	45	39	59	16	60	31	40	38	63	79	188	34	37	38	44	52	51
CSGALNACT2	0.205874	4.27902	4.54649	0.0329863	0.568849	438	428	356	658	393	384	515	416	493	278	413	476	427	393	495	338	916	686	651	281	158	452	371	450	318	408	303	495	719	349	526	440	459	468	266	432	524	469	569	448	424	443	626	516
SNX14	-0.128004	6.09932	4.54392	0.0330358	0.568849	1652	1586	1449	2020	1856	1338	1795	1717	1528	1533	1692	1931	1269	2038	1995	1368	1984	1898	2355	1065	1763	1453	1645	1915	1713	2199	1276	1934	1937	1147	1537	1806	1776	1761	1632	1570	1724	2234	1767	2256	2007	2175	2212	2531
SERINC1	-0.221901	8.43584	4.54384	0.0330375	0.568849	10775	11460	9580	19122	11118	6198	7632	8909	5824	7397	6003	9801	6102	11335	9502	5298	15673	9924	14802	5352	5427	7987	6477	7762	12366	16907	5500	15454	10749	6547	8559	8910	10877	11734	6447	8115	11645	12393	8763	10335	6738	10334	9743	16732
TCF7	0.319509	2.87796	4.54271	0.0330592	0.568849	98	148	251	199	150	188	151	92	156	85	198	188	115	130	316	224	266	215	234	160	70	227	153	164	216	129	124	99	241	142	245	160	186	185	75	102	115	116	239	98	183	187	135	119
IL10	0.842746	-0.0615885	4.53952	0.0331209	0.56927	18	62	25	58	29	34	4	21	1	1	21	1	13	0	6	28	65	39	100	2	0	56	0	18	27	39	6	6	34	12	79	64	8	37	19	5	11	13	26	7	1	26	27	0
MTERF4	-0.198216	5.14135	4.53461	0.0332161	0.570266	1186	972	1033	1140	1027	787	802	718	485	789	852	1208	820	1205	960	616	1289	1098	1377	640	668	850	790	940	978	1524	711	1554	1356	716	1112	918	1473	1161	683	786	1193	1075	716	1098	820	891	1110	1204
PTPMT1	-0.141903	4.63561	4.52831	0.0333386	0.571368	832	797	652	827	732	463	604	609	433	500	503	696	602	903	819	434	930	637	775	347	485	469	485	574	990	1022	494	668	662	479	544	553	587	696	587	590	603	763	520	829	503	737	785	887
DKK4	-0.615578	0.671761	4.52746	0.033355	0.571368	52	43	98	108	19	23	18	46	19	59	17	176	3	63	59	18	113	8	23	0	46	15	26	17	36	81	24	126	75	34	69	28	40	104	2	19	22	90	22	31	27	42	70	112
FAM200A	-0.235174	3.49787	4.52374	0.0334277	0.571973	304	321	278	430	346	355	354	427	182	253	226	246	252	538	335	258	562	215	518	178	179	314	144	206	206	479	233	573	349	186	184	341	292	352	182	211	361	293	343	259	254	331	390	511
NGLY1	-0.190582	4.88008	4.51518	0.0335954	0.57206	730	658	734	705	739	727	844	782	689	916	1008	881	683	884	1064	704	810	911	1052	528	650	579	694	809	924	706	709	581	813	567	673	899	740	757	667	586	607	889	661	992	1486	911	988	736
KCNJ13	-0.65465	1.61349	4.51008	0.0336956	0.57206	72	70	219	39	95	47	433	90	58	22	61	12	16	183	439	67	60	45	28	19	107	29	104	134	305	55	220	64	274	41	33	40	47	43	164	33	101	109	20	13	46	365	19	70
RAB3GAP1	-0.121196	6.14722	4.50981	0.033701	0.57206	2406	1960	1814	2182	2017	1384	1737	1458	1667	1442	1765	2155	1585	1922	2125	1327	2421	1804	2295	996	1329	1255	1270	2006	2152	2411	1760	2169	2000	1495	1741	1946	1760	1925	1968	1920	1873	2190	1571	1931	1696	1895	2148	2244
MAGED1	-0.221682	7.16717	4.50774	0.0337418	0.57206	4236	5009	4265	5929	5176	1441	3595	2708	2023	2290	2438	6435	2225	5052	4172	2321	6289	3199	3975	2249	1980	3045	3052	2839	5229	8031	2191	5290	5447	2228	2952	2434	4990	3402	2472	3200	4212	3884	3093	4918	2509	4547	3971	5618
OXSM	-0.3077	4.23461	4.50755	0.0337455	0.57206	638	563	478	739	554	421	598	545	401	560	550	500	514	797	741	363	574	409	720	293	498	464	469	657	517	565	503	381	643	442	409	668	543	601	667	440	573	599	625	743	1096	573	559	759
PIK3CG	0.602062	0.316373	4.50747	0.0337471	0.57206	9	19	59	58	26	6	9	47	7	0	15	49	13	31	105	29	18	52	58	1	1	34	12	10	59	29	28	16	88	25	38	60	9	31	0	7	52	38	38	41	27	19	8	23
IRF8	0.549244	0.840628	4.50594	0.0337773	0.57206	12	52	16	11	39	7	7	70	40	11	58	8	56	44	53	101	34	27	134	34	20	22	21	35	57	2	21	41	51	17	42	16	12	10	23	29	24	36	15	29	18	19	21	44
ALB	-0.734276	8.532	4.50458	0.0338043	0.57206	22185	6658	8691	5566	6765	9206	18587	10220	4179	3176	8259	6004	13569	73608	32026	3617	1621	1940	3476	8194	21096	1621	14583	50631	18590	1585	7858	2220	12869	2963	2043	899	2162	1960	32463	2014	7224	18005	4796	2063	11719	32230	3198	7389
PHF6	-0.285454	5.2691	4.50065	0.0338819	0.57206	1419	1349	1438	1726	1691	1476	1778	1749	1574	1554	1769	1900	1364	1791	2097	1187	1675	775	1125	486	604	644	767	932	941	818	795	813	1016	628	833	877	778	800	880	870	912	970	800	992	1048	906	1185	1018
TDO2	0.827478	2.42534	4.50063	0.0338823	0.57206	147	428	223	284	68	20	173	38	16	23	67	19	51	66	164	48	617	100	375	45	39	409	23	280	197	107	123	30	300	108	132	234	164	303	61	2	96	96	28	44	103	124	162	199
COL1A1	0.6215	7.8141	4.49978	0.0338993	0.57206	2530	2789	10486	3768	1853	1226	5436	1677	1765	1128	2129	2014	1490	4506	8527	2509	5684	9760	3611	3774	411	5120	2596	3594	3134	3775	2292	6892	17029	2655	2770	1282	5027	2432	713	1281	6065	1422	4133	2983	1971	6414	3221	3960
FCRLA	0.780419	-0.213864	4.49823	0.03393	0.57206	31	67	4	31	7	5	5	4	22	0	12	26	30	8	13	20	68	14	27	3	7	40	0	8	45	24	39	25	19	14	35	27	24	35	9	13	14	3	16	21	3	27	46	0
RAB1A	-0.187405	6.9582	4.49775	0.0339395	0.57206	2452	1974	2459	3101	3250	2324	3427	2561	2358	2543	3141	3934	2393	3209	3832	2648	3196	3813	6009	3133	3678	3184	3707	4213	2663	2695	2224	2337	2873	1726	1890	3043	2164	2698	2550	2441	1925	3860	3802	4766	3930	4516	3645	2932
ARMCX6	-0.213128	4.38036	4.4969	0.0339563	0.57206	727	681	597	622	455	659	602	554	431	703	746	514	506	771	739	676	571	525	593	363	636	508	527	711	566	587	426	530	695	448	506	508	472	642	578	489	529	673	529	527	745	739	657	476
CHST9	-0.416826	4.98586	4.48802	0.0341332	0.574406	565	471	772	1778	1126	233	656	591	319	611	300	1520	392	1425	948	328	810	671	1151	477	235	644	482	490	648	1355	214	1489	704	266	578	601	943	872	158	635	1099	1060	745	1115	687	977	1165	1471
MTMR2	-0.198029	5.441	4.48358	0.0342219	0.575267	1224	972	889	1456	1113	1022	882	843	693	802	1216	1154	859	798	1113	977	1175	1657	2052	1042	1467	1169	1194	1427	1802	1793	911	1112	1069	656	901	1389	1022	866	861	1048	988	1644	1500	1553	1387	1576	1558	1337
PBRM1	0.133987	5.90499	4.48122	0.0342693	0.575431	1128	1474	1397	2084	1621	1518	1585	1542	1681	1412	1546	1523	1546	1615	2080	1323	2190	1282	1641	1110	1172	928	1113	1277	1163	1367	1199	1518	1710	1034	1334	1335	1485	1455	1385	1455	1501	1428	1807	1561	1076	1638	1766	1767
TNFAIP8L3	0.691224	-1.04144	4.47767	0.0343406	0.575995	3	14	12	1	2	2	6	3	11	0	3	5	0	3	14	10	13	20	16	0	1	7	5	0	18	5	0	3	16	9	15	12	2	1	8	5	8	17	12	3	2	16	1	0
SKP2	-0.198813	2.45256	4.47382	0.034418	0.576201	141	101	93	172	103	106	158	142	97	76	133	182	135	154	191	149	159	162	314	80	144	117	102	153	152	215	130	197	135	161	127	132	124	93	148	134	140	105	220	123	156	179	155	163
DDIT3	-0.434299	5.97056	4.47283	0.0344378	0.576201	2327	1751	1737	1952	1595	1737	1817	1696	1403	1665	2057	1222	1281	1838	1643	1136	6342	11900	1692	756	2012	2127	1491	1469	1929	2027	925	1308	1899	1244	1939	2028	1971	2484	1753	1580	1081	1303	1089	1490	1855	1695	1670	1466
CREM	-0.289857	4.78034	4.47096	0.0344755	0.576201	750	677	896	1332	1489	672	670	553	517	546	748	2209	728	918	1031	536	1647	394	815	418	535	601	427	739	655	1414	683	674	757	536	598	593	490	728	593	633	664	954	504	924	1138	725	981	1061
DHRS2	-0.593097	5.61054	4.46952	0.0345047	0.576201	647	1253	2003	3664	3220	373	786	827	722	603	523	4221	559	1309	1809	211	2490	675	2378	496	211	1043	204	145	1723	4844	490	4009	2270	458	1418	1110	1575	1351	37	718	2289	705	700	2370	651	2073	2211	2096
CNST	-0.167742	4.75529	4.46772	0.0345411	0.576201	868	801	710	1137	771	467	762	528	604	475	541	922	582	923	819	404	1149	769	929	324	455	398	564	583	778	966	549	795	788	515	548	848	690	797	601	776	759	791	686	881	679	827	964	1112
VPS13B	0.187113	5.0357	4.46063	0.0346847	0.577966	368	641	658	1180	1005	555	793	950	588	582	562	632	655	935	672	513	1196	676	1102	610	466	593	478	712	622	859	711	1198	952	724	763	849	914	951	550	907	1052	657	604	931	542	857	958	1443
EDN3	-0.709226	4.57159	4.45611	0.0347766	0.578406	285	143	862	1100	1565	102	281	401	342	319	179	2673	193	1178	506	111	177	115	438	133	172	440	102	68	273	595	40	2273	777	294	113	172	395	379	40	464	630	650	332	743	162	745	661	664
SBDS	-0.360262	7.05543	4.45501	0.0347989	0.578406	4443	2846	1994	6209	5237	2656	2993	2254	2177	2447	4147	5012	2376	2383	2224	3606	3756	5597	8183	3657	5581	4729	5247	5169	4519	5916	3065	3275	2636	1637	2240	5630	2597	3660	1797	2494	2189	5608	4856	7484	5341	5878	5477	5594
POLG2	-0.233682	2.55172	4.45276	0.034845	0.578406	143	174	144	232	205	208	137	177	124	129	135	149	133	181	256	97	233	182	232	161	90	129	125	158	145	223	136	185	180	101	191	197	209	157	137	124	167	136	137	210	144	130	193	236
IQCC	-0.299343	1.94889	4.4519	0.0348624	0.578406	110	180	63	168	175	94	79	131	99	115	69	100	77	76	152	60	226	130	140	44	80	77	91	84	134	249	53	185	74	84	107	76	90	100	51	100	118	83	38	106	74	99	112	101
GPR68	0.539236	1.76416	4.44941	0.0349133	0.578554	36	94	61	169	73	10	22	40	51	13	25	72	42	20	28	24	229	73	114	30	8	61	27	24	57	114	27	76	143	53	91	92	73	102	7	23	51	22	48	51	46	68	104	69
FGGY	-0.288363	3.90978	4.44589	0.0349853	0.578554	484	511	597	605	262	331	612	486	245	359	449	411	348	734	664	277	474	437	553	257	393	398	316	607	718	586	217	569	482	274	447	209	370	474	352	386	516	523	409	417	423	602	516	567
RNFT2	-0.450101	1.57725	4.44182	0.0350688	0.578554	63	151	121	202	138	22	56	95	74	39	38	104	76	152	72	25	177	85	123	75	41	83	50	40	101	192	40	169	96	43	69	62	84	85	48	84	131	51	47	102	58	94	92	134
MPC2	-0.345913	6.61581	4.44106	0.0350845	0.578554	3414	2843	3183	4083	3663	1930	3369	2079	1234	2048	2372	2956	2322	4358	2789	2167	3895	3139	4969	2066	2805	3762	2710	4002	5117	4630	1827	3419	2386	928	1873	2584	4346	2121	1239	1707	3274	4126	3191	3232	3919	4829	3548	4250
IFI16	0.327421	5.49124	4.43908	0.0351251	0.578554	851	1567	1297	1198	817	1278	2047	972	831	761	1615	1016	1199	1135	1310	818	1194	968	2488	612	1542	1484	833	1577	894	865	1157	784	1314	859	922	1573	839	1564	1077	1326	871	1079	1402	1050	2239	1319	1673	932
JARID2	0.198532	4.38122	4.43887	0.0351295	0.578554	501	503	619	903	619	299	529	421	375	466	344	578	306	575	627	295	1148	750	892	328	379	455	379	336	435	495	272	714	723	341	461	471	611	598	257	451	639	494	480	659	356	544	624	694
AIFM1	-0.168067	5.09844	4.43684	0.0351713	0.578554	1163	981	991	965	1070	698	865	814	447	717	933	1082	657	1403	1113	642	1080	916	1130	503	817	776	702	996	1296	1573	786	960	1071	528	907	781	902	856	967	697	944	1250	893	1186	698	1114	1003	1028
CDKL2	-0.364832	1.91516	4.43671	0.0351739	0.578554	74	33	130	93	91	28	58	115	82	73	60	73	50	123	144	51	166	246	138	59	60	74	164	80	64	109	42	141	182	46	128	55	182	134	81	115	83	79	91	91	90	118	109	195
MYH7	-0.43791	0.267704	4.43452	0.0352192	0.578677	31	23	33	16	47	45	41	19	58	29	42	49	43	44	50	26	10	39	12	22	32	26	31	17	45	11	15	7	17	34	26	33	22	31	26	18	25	33	26	19	19	32	35	3
IL2RB	0.640139	-0.901249	4.42956	0.0353215	0.579735	8	22	18	0	17	5	2	18	0	3	10	12	18	0	9	18	7	28	34	3	0	8	4	6	6	2	10	11	7	8	7	2	6	13	5	5	4	33	11	15	9	5	6	9
SMIM6	-0.474148	4.47	4.42466	0.0354232	0.579986	668	791	966	1240	795	485	960	551	332	611	529	967	559	889	883	336	772	452	831	503	441	526	589	633	899	1268	410	1082	1023	287	483	618	800	858	498	740	706	988	462	589	781	969	906	955
DDX3X	-0.20857	8.44791	4.42253	0.0354673	0.579986	11841	15943	7076	12535	10378	10948	12488	10572	8592	8356	11592	13271	11097	13473	12611	6036	12633	6004	15450	7024	7293	5778	8287	9822	11304	10116	6172	8875	9459	9818	9692	11061	8639	8588	8813	9745	9750	10774	9597	9209	8140	9670	13283	8648
AK7	-0.305769	3.3993	4.42149	0.035489	0.579986	301	283	469	528	414	165	204	379	205	194	148	312	262	403	407	141	631	228	420	190	158	245	163	445	307	550	113	313	292	182	225	276	310	270	286	274	365	431	253	319	304	461	523	405
SPEGNB	-0.523311	-0.240084	4.42043	0.0355111	0.579986	18	5	19	112	54	13	16	13	8	10	15	26	8	21	53	14	66	27	43	17	5	38	4	6	18	57	2	29	14	19	45	23	32	30	5	8	17	16	7	49	14	17	30	38
RTN4IP1	-0.290116	3.57308	4.41704	0.0355817	0.579986	455	409	368	411	433	263	413	356	209	255	385	394	314	484	530	212	484	343	508	239	336	223	273	377	491	357	308	351	468	270	279	304	305	347	497	319	305	460	289	368	308	503	402	395
SHOX2	0.730094	-1.57916	4.41698	0.035583	0.579986	6	1	0	4	0	2	15	12	0	7	2	7	7	2	8	6	3	3	11	6	2	11	14	3	1	1	0	2	4	2	3	0	0	1	9	6	12	2	20	0	2	8	5	6
ZBTB39	0.271523	2.5145	4.41261	0.0356743	0.579986	113	158	102	81	115	146	93	139	80	120	74	75	77	56	131	120	118	94	176	91	94	57	72	93	102	131	69	99	69	107	108	113	126	175	111	130	154	131	128	157	75	129	143	167
XYLT1	0.312925	3.54676	4.41027	0.0357231	0.579986	254	197	174	240	238	151	152	324	181	170	193	387	193	127	213	194	420	215	516	157	125	158	145	298	98	274	201	296	216	324	214	207	169	308	167	252	234	129	313	372	222	192	313	294
HIF1A	0.233536	8.42645	4.40979	0.0357332	0.579986	10758	11474	9956	7327	8504	7073	13979	9085	6507	5735	8076	6893	8076	12959	12960	6662	10320	7945	14318	5263	8648	6698	7169	11511	12533	5691	8347	4260	9454	7216	6416	9568	5499	6592	11624	5840	5274	12231	8397	7719	6459	9819	8790	8017
HMBOX1	0.197887	5.60336	4.40896	0.0357506	0.579986	1033	1229	904	1074	1284	1323	979	1402	1260	1434	1293	1320	991	1526	1293	953	1568	1282	1654	910	1171	1108	855	1424	1159	750	1419	940	1075	1034	1143	1340	689	1446	1172	918	1019	1233	1015	1385	695	1054	1137	1011
PTPDC1	0.207013	2.54236	4.40789	0.0357731	0.579986	86	69	156	197	142	96	177	128	141	145	103	80	105	107	159	105	230	138	159	80	82	89	93	192	89	77	55	133	143	127	155	98	98	176	86	149	180	127	145	177	121	128	127	151
ERICH2	-0.278236	1.31972	4.407	0.0357918	0.579986	52	28	65	133	109	41	55	65	51	56	56	43	30	101	91	41	160	57	53	30	63	70	52	75	50	77	36	71	47	26	59	58	75	57	60	37	47	65	65	84	145	69	63	79
TMTC1	0.53721	-0.29238	4.4033	0.0358695	0.580631	5	28	18	24	34	1	14	18	25	1	7	3	6	24	28	8	61	23	12	1	5	2	19	13	25	27	11	4	20	10	18	9	21	37	9	9	17	1	31	3	4	9	17	14
ACSM1	0.551002	2.38537	4.3971	0.0360001	0.582128	64	91	188	45	93	202	106	265	82	29	87	44	74	126	200	265	64	88	45	136	80	99	257	129	102	59	332	132	201	62	92	55	74	143	155	60	163	106	192	55	96	95	53	83
NDUFB10	-0.278179	5.41847	4.39005	0.0361493	0.582795	1216	951	878	1265	1513	1007	1136	801	800	855	2860	1188	876	1051	1239	1452	918	1455	1886	1203	1987	1267	1446	1730	1232	1076	752	935	1489	445	482	1980	708	728	708	726	650	1732	1683	1450	1032	1924	1112	1209
GJC1	-0.491046	1.59316	4.38666	0.0362213	0.582795	104	90	55	50	47	96	115	38	18	61	91	24	17	60	37	46	13	44	93	35	130	76	81	56	40	68	115	49	117	81	56	116	61	234	96	75	87	72	93	60	47	119	64	62
PTPN9	0.255189	4.35268	4.38549	0.0362461	0.582795	512	340	488	415	478	431	428	291	300	324	389	431	326	403	433	284	657	487	437	290	525	295	334	417	401	302	348	325	454	397	354	378	340	493	566	307	362	580	472	336	256	394	389	380
CIART	-0.447319	3.61078	4.38383	0.0362815	0.582795	284	138	326	590	415	157	363	284	240	292	267	185	274	559	547	238	635	661	602	96	152	392	214	249	513	893	122	422	512	229	390	220	447	478	211	421	681	397	291	613	268	366	382	606
PLPBP	-0.148795	5.4279	4.38256	0.0363083	0.582795	933	723	850	1413	1200	895	1040	937	736	1086	1067	1293	964	1319	1052	1022	1458	1031	1955	860	1023	1100	1205	1133	996	1199	1058	1135	1024	635	836	1094	862	914	884	1014	1021	1190	1229	1499	926	1370	1421	1294
KLHL12	-0.161485	4.71333	4.3825	0.0363098	0.582795	597	578	505	803	760	425	589	502	393	689	553	787	585	893	627	365	861	841	924	375	475	602	669	687	694	901	486	590	723	394	488	674	579	619	479	466	543	813	683	824	607	817	841	849
MTERF2	-0.282239	5.61318	4.38068	0.0363484	0.582795	1053	1151	1909	2093	2015	973	1180	1357	1081	1213	1060	2392	1121	2020	2076	905	2246	1366	2134	1087	968	1319	1109	1553	1147	1398	793	1982	1818	929	1151	1096	1590	1447	977	1364	2129	1529	1272	1296	1365	1773	1743	1897
PGRMC2	-0.181895	5.97106	4.37885	0.0363875	0.582795	1325	955	1504	2593	1931	1094	1526	1665	1501	1579	1250	2553	1089	2132	2456	901	2847	1312	1672	985	1129	1246	1078	1400	1350	1180	1027	2027	1849	1045	1099	1287	1583	1864	1084	1594	1564	1669	1191	1959	1535	1634	1872	2055
TFCP2L1	-0.470804	2.75816	4.37726	0.0364216	0.582795	56	124	100	278	173	77	95	74	30	80	73	165	82	166	148	63	142	256	138	69	132	79	133	64	68	166	32	284	186	70	184	159	154	262	64	89	212	164	56	167	37	195	176	173
PLIN1	0.619937	-0.530772	4.37722	0.0364223	0.582795	11	4	17	18	7	5	31	9	37	4	3	19	32	12	2	8	16	12	10	2	10	14	20	19	0	1	11	11	5	9	6	8	8	18	2	9	4	9	0	1	4	0	12	17
CFAP46	-0.505214	-0.362159	4.37189	0.0365365	0.583687	17	10	17	34	47	24	28	6	13	2	17	2	4	16	9	18	65	16	28	4	21	13	18	8	24	25	13	5	15	9	9	20	13	11	7	16	5	19	16	9	24	19	33	10
ARMCX2	-0.309714	4.33232	4.36967	0.0365842	0.583687	482	572	423	910	658	288	417	278	319	445	223	500	337	426	583	216	944	431	565	201	210	451	300	311	357	713	284	687	652	367	346	400	641	493	205	421	616	324	391	725	367	509	678	757
COL8A2	0.692853	-0.201581	4.36928	0.0365925	0.583687	4	12	5	21	11	22	6	22	0	9	0	2	16	4	25	8	14	29	2	7	17	12	2	21	2	4	3	12	8	5	6	19	10	7	32	21	7	12	17	0	6	12	23	12
EP300	0.218762	5.9837	4.36322	0.0367229	0.584845	1272	1262	1364	1821	1686	1056	1514	1347	1025	1118	1280	1454	1008	1406	1699	1012	1800	1296	1721	950	1008	1026	939	1196	1062	991	1150	1243	1742	1004	1199	1329	1349	1482	1253	1310	1645	1537	1494	1349	562	1527	1506	1650
ATP6V1E1	-0.191765	6.78717	4.3614	0.0367621	0.584845	5129	4319	3046	4528	3047	1917	3110	3004	1500	2676	2839	3538	2460	3640	3267	1787	5124	2920	3569	1609	2775	2836	2442	2275	3937	5235	1587	3555	3713	2052	2434	2872	3389	3640	2706	2877	3039	3385	2500	3165	3100	3353	3751	3855
FAM47E	-0.293516	2.70646	4.36058	0.0367798	0.584845	155	133	159	330	263	117	143	165	127	118	84	199	103	182	146	111	284	252	261	183	78	170	102	141	189	279	118	308	220	78	139	196	220	170	53	148	125	171	138	291	217	294	230	300
ATP6V1E2	-0.271812	1.82339	4.35688	0.0368597	0.585507	62	98	96	133	88	111	115	78	56	69	94	112	91	71	79	58	139	80	132	33	104	109	45	84	76	57	46	65	52	73	49	72	56	99	60	87	55	122	41	114	52	133	89	146
ANKRD39	-0.352401	3.54836	4.34589	0.0370984	0.587891	390	396	382	731	563	218	313	280	180	183	241	521	276	449	242	179	608	464	496	172	196	355	275	220	471	880	222	488	318	155	228	287	312	417	197	214	282	427	355	561	200	486	369	489
IRF1	0.228755	5.34196	4.34416	0.0371361	0.587891	719	1002	831	837	1073	1063	1215	765	641	587	1117	704	1034	829	1038	704	1478	577	1762	647	1250	708	772	1018	1301	657	979	422	1202	876	566	1107	715	946	1418	837	724	1236	955	771	695	763	1125	823
RASL10B	0.512779	0.863141	4.34262	0.0371697	0.587891	29	14	53	57	54	30	12	14	4	11	34	32	42	20	37	16	73	23	13	33	3	30	8	18	32	16	26	52	75	31	20	31	33	22	9	29	61	13	32	23	28	28	35	55
ZRANB3	-0.19978	2.79913	4.34111	0.0372026	0.587891	174	231	171	312	260	104	99	181	126	218	173	240	197	201	167	157	189	154	221	145	99	122	129	170	224	302	107	253	172	154	158	191	200	150	92	225	256	158	176	209	250	152	213	296
EXOC8	-0.192561	4.24981	4.33893	0.0372503	0.587891	294	358	548	539	546	356	343	548	529	582	500	747	434	716	491	333	671	392	657	335	406	442	454	417	195	230	398	742	724	424	333	486	390	654	374	654	540	433	469	541	518	540	660	587
SDHAF4	-0.349988	3.77634	4.33718	0.0372885	0.587891	458	396	470	868	293	247	432	409	252	311	178	396	291	528	636	247	628	489	614	217	350	476	292	394	505	703	200	789	623	164	296	225	679	550	255	381	537	570	191	391	410	566	392	698
PPM1K	-0.39937	5.29955	4.33648	0.037304	0.587891	1089	1474	1110	1789	1809	466	777	887	632	605	530	1935	502	1246	1090	317	1649	633	1241	599	406	954	517	543	1564	5912	705	1638	1317	681	928	1345	1307	1365	408	909	1291	653	724	1742	901	960	1736	1775
CKAP2	-0.319732	3.45581	4.33452	0.0373469	0.587891	322	312	494	382	245	147	375	207	284	271	323	297	435	578	760	57	388	283	264	177	211	299	189	150	275	469	270	426	454	277	207	194	371	252	293	268	302	556	425	464	412	520	412	386
HMBS	-0.310621	4.61653	4.33412	0.0373557	0.587891	882	781	718	749	1128	794	663	725	637	917	1058	767	1101	819	866	621	1108	789	858	537	1001	788	542	668	534	928	673	502	681	658	473	586	598	678	787	685	334	908	837	710	647	900	833	678
KIAA1755	0.729428	0.489373	4.33087	0.037427	0.588408	6	19	27	39	5	5	44	18	1	10	19	21	4	3	11	22	39	125	76	20	1	35	4	7	0	45	37	30	61	32	41	19	46	28	4	10	48	1	41	21	9	14	50	29
FGR	0.827374	-0.60773	4.32488	0.037559	0.589877	8	9	0	5	9	3	0	16	1	2	0	0	23	15	12	24	21	12	6	11	5	3	0	0	6	6	12	4	9	8	13	9	2	25	4	4	11	11	10	6	8	5	3	14
GRAP2	0.5867	-0.181804	4.31738	0.037725	0.590437	15	55	43	20	34	2	7	6	0	1	6	24	0	8	28	15	21	1	62	18	1	11	12	9	49	52	6	39	18	11	15	27	34	9	5	3	19	4	11	9	10	9	28	36
PRXL2A	-0.232485	6.46569	4.31661	0.0377419	0.590437	3081	2868	2812	3440	2384	2082	2756	2262	1405	1790	2281	2310	1887	3162	3154	1779	3555	3251	2658	1973	1697	2392	2309	2690	3446	3898	1657	3339	2993	1313	2171	1395	3106	2652	2176	2064	2657	2782	2252	2183	1628	2837	2424	3259
LTBP2	0.500663	3.36795	4.31507	0.0377763	0.590437	178	122	248	283	161	72	172	96	165	99	177	92	171	107	166	176	308	423	212	173	27	234	155	89	81	165	66	288	450	128	244	141	180	214	82	68	161	100	250	267	154	252	269	227
ENG	0.669219	3.89768	4.31493	0.0377794	0.590437	83	129	191	289	215	63	149	72	169	79	165	254	96	124	141	187	200	537	504	212	32	432	78	153	69	134	194	295	267	133	237	210	157	161	23	74	141	102	207	453	142	191	213	78
PCDH9	0.407463	4.02676	4.31455	0.0377877	0.590437	286	600	307	455	502	297	544	503	305	384	256	359	490	540	483	230	518	702	525	385	170	122	478	519	905	445	128	430	658	314	119	154	355	290	517	296	689	317	327	255	365	801	507	1128
COX5B	-0.415189	6.7666	4.30868	0.0379183	0.591155	3423	2026	2107	5273	4599	2219	2606	1727	1464	2115	3601	3295	2290	3049	2482	3500	2682	5630	6398	3366	5883	4208	4289	5276	4325	4099	2115	2943	1481	547	1546	2951	2244	1772	1068	1494	1707	5334	4604	4822	5311	7006	3594	4449
NCAM1	-0.330354	5.40852	4.30802	0.037933	0.591155	615	1026	736	1650	1115	770	618	1247	352	691	964	634	289	943	1746	743	1641	1222	1072	701	1111	699	1471	306	1094	1482	279	1186	1030	289	668	918	1022	1081	1016	1180	1507	2093	699	957	741	809	1180	1533
ADTRP	0.388618	1.83046	4.30728	0.0379495	0.591155	46	80	142	187	93	52	115	113	74	51	88	101	52	32	141	46	153	85	103	23	33	143	43	70	90	152	113	33	142	106	129	74	63	145	58	71	92	64	112	113	86	153	158	164
KLB	-0.417233	2.09463	4.30245	0.0380576	0.592235	97	121	139	73	49	112	132	118	50	98	114	48	46	311	237	96	74	50	114	67	85	57	81	252	71	78	79	94	140	37	47	79	135	51	129	46	144	82	62	23	58	263	133	116
ESCO2	-0.689303	-0.85224	4.29889	0.0381372	0.592456	15	0	31	10	16	5	10	1	18	15	6	0	10	34	10	0	5	70	20	20	12	10	9	41	28	6	6	38	33	16	6	4	19	16	39	16	37	8	10	15	9	29	7	20
ELK3	0.288358	5.35454	4.29799	0.0381574	0.592456	1088	1648	899	914	863	841	1038	1099	769	1150	1238	898	1105	572	883	936	1207	964	1865	713	740	836	646	886	973	1158	1267	639	948	1448	1503	1669	610	1261	1116	1168	486	1013	1323	1444	984	830	1296	656
CLDN2	0.509586	7.49707	4.29663	0.038188	0.592456	9237	10379	3797	2038	4799	5699	5798	3782	1926	2130	4859	3536	9514	5549	4086	3292	5150	2434	4483	2113	2433	2596	4011	2739	16763	5216	8891	2893	3625	6242	3801	1690	2075	2321	5182	3166	3921	7577	5521	2297	2591	3610	4327	4849
DHRS4L2	-0.207783	2.98168	4.2899	0.0383395	0.594203	184	188	197	225	244	173	212	177	160	157	186	257	135	254	316	191	198	182	286	185	201	244	229	159	255	297	126	234	228	100	152	158	206	201	156	152	193	166	192	144	166	257	197	220
PIK3R4	-0.135667	4.64319	4.28565	0.0384355	0.595089	719	880	543	805	658	454	479	601	601	510	529	611	546	812	851	435	804	524	823	374	396	452	482	609	755	1055	549	728	661	486	520	633	590	696	558	616	621	788	702	741	536	760	745	609
HSPA5	-0.267598	9.78795	4.27252	0.0387333	0.597606	32941	35075	22818	28847	28760	18465	19927	21697	14005	18779	24062	37517	26380	30542	26913	16046	35019	18624	26620	11718	17855	18594	18295	21477	44290	39949	26751	16329	20938	21905	20954	22640	19060	22964	21067	19070	15362	29819	23938	36976	38230	26843	30281	25674
GNA14	0.457351	-0.226134	4.26953	0.0388017	0.597606	0	23	20	34	6	11	32	8	8	18	11	11	21	37	56	24	8	8	19	15	2	30	4	16	8	17	12	11	8	20	36	21	19	14	11	11	20	20	16	4	29	46	29	9
CCDC144A	0.493205	2.1692	4.26888	0.0388165	0.597606	46	65	62	101	96	35	147	79	51	74	67	217	135	75	96	80	134	82	39	46	48	128	198	124	43	17	118	51	121	95	111	84	54	162	79	31	86	164	98	255	121	193	103	115
CST6	-0.627704	-0.857762	4.26778	0.0388416	0.597606	31	5	24	2	3	14	25	17	2	1	10	22	6	8	11	18	5	8	6	3	19	2	21	2	4	4	7	1	12	9	5	1	8	27	8	13	5	10	9	5	5	10	10	3
KLHL11	-0.20578	4.40616	4.26631	0.0388752	0.597606	452	694	580	919	801	371	593	536	400	352	363	803	466	544	812	265	1088	432	813	267	358	378	394	456	541	744	423	641	779	423	472	603	745	662	288	629	672	563	517	746	533	764	729	872
FAM20C	0.666993	2.89655	4.2657	0.0388892	0.597606	71	87	92	107	66	40	90	47	31	17	66	76	81	80	118	76	184	108	66	107	18	58	30	47	42	25	72	61	110	32	63	66	59	70	21	31	50	33	44	53	38	92	149	91
ZFPM2	0.606178	-0.701195	4.26347	0.0389404	0.597606	2	11	17	36	14	4	8	0	13	0	5	2	6	15	0	6	50	46	17	8	0	23	30	1	3	1	3	26	18	14	6	8	22	20	6	4	12	0	21	38	5	14	25	10
SNX7	-0.235892	4.75044	4.2627	0.0389579	0.597606	815	672	760	475	750	822	989	709	658	831	987	587	923	1074	1108	751	554	551	676	477	698	619	659	980	785	662	641	758	1045	657	518	602	690	666	929	738	570	875	875	608	949	1099	1053	807
GGNBP2	-0.122154	5.76534	4.26128	0.0389905	0.597606	1231	1114	1340	1736	1446	1247	1635	1221	1031	1306	1389	1604	1303	1642	1703	1061	1881	1564	1932	1118	1305	1199	1126	1361	1361	1407	972	1544	1728	1083	1337	1208	1470	1698	1424	1369	1351	1978	1453	1672	1422	1704	1687	1757
SLC7A8	-0.499209	7.05186	4.26016	0.0390161	0.597606	2758	4921	2996	6187	4024	821	1669	1599	1772	1574	1179	6765	1221	4245	2566	1028	5386	1914	3703	2260	576	2947	1646	924	3914	11808	1254	10963	6040	1222	2721	2981	6400	2776	552	2712	6749	2712	2437	5023	1706	3909	4794	6191
PGAM4	-0.260461	3.19706	4.25935	0.0390349	0.597606	421	306	217	359	259	165	305	222	152	187	251	281	194	263	280	200	293	276	360	163	290	260	187	400	536	417	225	217	202	133	171	267	189	224	185	151	151	335	266	345	430	314	286	277
IFITM10	0.753807	1.56749	4.25796	0.0390669	0.597606	47	12	26	18	39	21	74	32	28	10	31	12	15	172	71	14	20	18	29	9	35	18	33	82	63	13	8	14	68	15	14	7	26	39	64	8	24	63	15	8	18	42	5	19
VPS45	-0.175503	4.86441	4.25357	0.0391679	0.598553	980	798	777	1142	893	531	845	739	577	580	701	812	828	858	1022	572	949	537	926	413	553	662	638	772	1127	1162	687	936	953	650	960	737	742	843	694	741	844	1031	699	952	835	905	1166	1062
TOX2	0.584824	-0.681398	4.24998	0.0392507	0.598883	8	16	13	15	23	4	19	3	12	0	7	14	4	3	3	7	9	14	7	10	6	24	0	0	0	8	5	25	7	17	9	4	12	2	1	4	4	6	19	16	10	15	4	28
BTG2	0.282677	5.87401	4.24924	0.0392678	0.598883	979	1325	641	976	1380	2100	1116	1397	1089	1630	2222	1356	1772	1457	1333	2143	1008	990	1138	829	936	1079	889	1501	1633	1125	1571	1173	1356	1183	1862	1251	889	1014	1222	1217	1118	998	1924	1475	1468	1242	1416	978
IL18R1	0.408884	1.54427	4.24388	0.039392	0.599063	41	106	111	155	107	68	42	22	72	38	76	117	88	43	61	56	205	31	94	40	37	48	28	73	52	140	51	44	78	59	65	134	70	36	35	32	74	29	90	87	74	53	130	98
PMVK	-0.277608	5.15049	4.24296	0.0394135	0.599063	1158	1424	1180	1515	1371	720	812	779	526	684	979	879	709	950	901	643	1627	988	1052	570	711	829	784	706	1644	2021	799	1677	1306	586	1105	826	1349	1281	768	862	1184	1104	728	1025	690	1333	1098	1627
APOA2	0.894433	-0.101559	4.24008	0.0394804	0.599063	100	4	119	4	18	32	98	10	22	8	13	1	52	25	22	5	41	10	15	0	13	11	20	23	25	18	11	11	32	23	6	12	1	5	28	7	7	21	48	6	25	11	8	35
CDH23	0.861157	0.0621745	4.23854	0.039516	0.599063	11	1	12	6	16	2	5	11	4	4	4	2	0	0	3	4	5	25	10	3	3	7	2	6	9	5	10	4	22	6	12	14	1	3	3	9	6	0	6	4	2	20	6	7
CFI	-0.371143	6.1643	4.23645	0.0395648	0.599063	1938	1666	4397	1046	2047	1331	3392	1918	768	893	1009	1150	1869	4864	8576	1747	733	1614	1550	1035	2254	1103	1787	5330	2434	2284	1625	766	3566	929	1017	590	1658	1179	3924	1156	2239	2563	2064	1358	2070	3299	1421	2438
GRHPR	-0.193054	5.27632	4.23501	0.0395983	0.599063	1626	1407	1053	971	1173	1065	1208	1128	681	1124	1441	1208	1097	1560	1291	1077	915	985	798	525	1071	943	1406	1206	1369	1155	920	472	1022	903	1247	879	697	917	1126	936	781	1113	959	1126	678	1060	1401	1168
PGF	0.705557	0.928444	4.23443	0.0396119	0.599063	3	19	17	77	65	13	14	5	30	1	26	10	54	15	11	51	57	71	30	6	3	43	15	2	3	13	32	34	32	24	19	10	23	21	4	4	5	13	10	52	46	14	29	21
CD84	0.512494	1.06822	4.23037	0.0397067	0.599063	9	25	26	38	51	45	49	63	47	21	25	36	43	28	130	128	36	52	59	28	0	33	36	20	105	72	25	43	82	17	101	86	41	38	58	24	59	49	46	29	47	110	75	39
ARL9	-0.487458	0.183878	4.22679	0.0397906	0.599063	32	63	45	145	117	8	30	50	23	13	27	51	28	52	79	15	92	14	16	21	23	24	17	19	25	58	12	50	10	21	14	18	23	49	13	32	44	34	21	24	19	24	28	62
FHOD3	0.410258	1.60432	4.22527	0.0398263	0.599063	13	35	51	46	63	41	73	56	22	15	24	69	30	63	132	29	110	80	60	43	15	50	32	24	36	51	34	85	94	18	44	38	64	44	37	37	76	33	60	46	37	72	60	74
ESRP2	-0.182804	5.32854	4.22294	0.0398811	0.599063	1393	1267	1009	803	967	990	1427	1455	842	933	1054	780	875	1538	1265	752	944	883	1295	923	1418	802	1055	1571	1178	653	869	874	1289	900	842	954	825	1449	1460	1171	873	1680	875	899	623	1331	965	1113
TIE1	0.667531	0.959695	4.2215	0.0399149	0.599063	16	14	46	65	20	5	31	35	3	3	38	46	25	12	20	16	54	54	34	15	0	58	5	7	12	31	85	56	24	20	84	27	22	29	25	17	70	15	59	87	24	22	19	13
PLXDC2	0.406845	3.1194	4.22069	0.039934	0.599063	45	211	149	329	141	123	219	110	118	122	127	60	71	226	284	162	248	241	205	277	17	184	179	254	274	328	101	295	333	95	159	144	261	121	117	101	111	117	197	177	265	349	314	225
CTAGE1	-0.390901	-0.727056	4.22017	0.0399461	0.599063	17	18	23	21	14	21	13	18	6	14	25	12	16	22	12	11	15	15	15	10	13	12	15	20	15	23	18	13	17	11	16	13	20	13	17	15	25	19	19	16	18	18	15	31
ZNF639	-0.150887	4.56181	4.22016	0.0399465	0.599063	513	493	704	673	644	559	608	532	371	515	577	1154	497	626	766	402	688	467	660	388	509	430	510	686	475	577	453	579	694	489	609	605	441	770	691	701	513	705	688	802	681	845	853	617
LIN7A	-0.402122	1.05531	4.21676	0.0400264	0.599063	38	42	91	108	49	21	29	63	60	26	34	111	19	136	138	33	129	57	33	55	41	23	33	77	42	69	10	109	67	33	16	59	40	36	60	21	75	54	16	38	97	57	72	58
SAMSN1	0.521249	2.62445	4.21546	0.0400571	0.599063	57	266	234	216	100	140	138	219	33	153	92	102	154	33	247	237	223	109	310	80	13	197	46	120	292	227	76	80	199	157	136	202	196	197	49	140	195	296	203	156	368	265	235	145
EOGT	0.162472	4.36068	4.21409	0.0400895	0.599063	555	596	440	673	537	513	483	458	366	444	472	507	384	677	684	350	663	516	771	290	459	366	399	614	629	473	474	442	522	589	580	594	508	581	490	611	614	570	595	446	322	533	519	650
ANTXR2	0.357692	3.05449	4.21381	0.0400963	0.599063	137	185	268	197	154	137	142	107	81	76	167	123	164	101	195	144	250	151	250	70	130	153	93	180	105	67	110	126	372	148	161	151	96	181	160	110	101	120	130	117	140	163	197	102
PPARGC1B	0.3982	0.694889	4.21364	0.0401003	0.599063	29	23	40	50	21	26	41	47	15	23	35	25	26	24	37	8	67	25	42	60	32	35	48	6	29	56	52	35	65	6	26	45	61	40	35	18	32	35	43	33	6	68	22	49
OTUB2	-0.332732	1.31649	4.21356	0.040102	0.599063	74	46	53	47	29	56	59	105	86	100	100	66	61	39	55	35	85	36	39	35	39	26	29	18	73	25	96	42	78	32	55	35	30	81	64	47	49	121	39	58	22	88	56	71
EPO	-1.07027	0.476808	4.20805	0.0402325	0.599881	6	18	20	0	1	22	80	20	40	6	49	7	36	198	270	62	4	10	19	16	39	5	9	468	143	1	7	2	12	9	9	7	14	1	45	10	0	4	14	5	266	31	0	1
LRRC42	-0.208441	5.01855	4.20766	0.0402419	0.599881	901	909	772	838	1129	394	988	784	557	544	648	1052	611	1002	1413	489	1100	794	1639	580	751	516	566	676	1174	1078	377	1285	600	534	545	787	866	1079	435	696	1382	924	579	1208	860	1204	1176	1216
LCP2	0.460714	2.08197	4.20198	0.0403768	0.599881	49	182	86	181	173	57	7	49	59	25	50	147	156	64	153	105	158	122	270	73	4	133	17	66	122	213	124	133	145	95	129	184	78	79	12	45	101	56	190	156	84	108	147	103
LRP4	0.371033	2.25334	4.20064	0.0404086	0.599881	43	136	113	120	110	88	72	36	96	87	79	93	92	74	86	53	148	158	112	79	40	84	68	59	79	93	113	120	193	64	118	44	105	124	35	56	115	80	58	119	85	106	107	159
ANKRD34C	-0.627369	1.72082	4.20047	0.0404127	0.599881	41	26	61	296	95	26	19	57	100	49	37	125	73	64	25	37	216	76	77	39	16	64	46	3	49	115	9	153	66	19	63	56	134	116	0	39	110	140	50	247	39	96	134	172
CCDC198	-0.263965	4.24562	4.20038	0.0404149	0.599881	417	382	680	710	430	399	567	721	352	534	523	669	223	547	673	398	503	322	548	397	408	315	575	614	728	577	585	521	571	299	440	628	391	358	743	401	451	961	617	442	512	697	727	438
GLYATL1	-0.726444	-1.25028	4.19932	0.0404402	0.599881	4	0	24	13	12	25	11	4	18	0	12	1	11	2	74	4	7	18	13	19	10	0	12	30	44	1	9	0	18	7	4	42	16	14	11	4	9	17	5	2	11	9	15	2
PIGL	0.21873	4.26529	4.19789	0.0404743	0.599881	634	669	415	669	725	475	499	580	449	532	637	395	422	509	464	413	696	595	714	430	404	370	327	446	581	640	477	509	526	395	504	417	434	500	558	318	552	462	302	378	206	391	313	558
H1-1	-1.07208	-0.320927	4.19539	0.0405341	0.599881	37	27	58	17	4	4	31	21	1	8	16	18	13	21	39	14	28	63	45	2	5	32	13	7	33	46	7	88	97	26	15	18	57	30	2	30	73	1	10	18	36	67	63	82
UBASH3B	0.346321	3.79147	4.19364	0.0405758	0.599881	661	349	180	214	203	414	335	373	434	331	346	210	329	81	251	295	339	381	548	315	213	259	362	209	209	149	338	196	360	470	414	337	272	520	210	426	229	383	546	433	164	314	275	339
GPX2	-0.539079	7.81526	4.19313	0.0405882	0.599881	10876	10427	14732	3902	6867	4894	12890	5799	2167	1731	7114	3971	6350	27156	16507	2876	4837	2873	6685	3020	13575	5101	10017	14635	21903	2894	4967	2188	10931	2205	1647	2506	4961	6114	20192	3171	5273	17814	3438	2007	2817	10228	3228	7407
LZIC	-0.215421	5.53156	4.18663	0.0407439	0.60128	1269	1213	1411	1498	1130	1276	1443	1263	1199	1223	1523	1369	1063	1498	1760	1113	1752	1210	1763	839	837	1094	1156	1361	1431	1406	1122	1553	1322	1089	1173	1272	1331	1435	1117	1258	1300	1214	1264	1463	1771	1681	1935	1356
CASR	-0.49938	6.3687	4.18527	0.0407767	0.60128	1730	2066	1418	5956	4287	634	984	1353	1082	1369	856	4463	970	1922	2572	710	3545	1631	2205	787	232	1029	610	499	1688	6287	641	4803	2194	833	2253	1855	1776	2777	224	2080	2672	2231	1261	2417	839	2110	2054	3508
MFHAS1	0.172066	4.91088	4.18427	0.0408007	0.60128	808	680	515	761	692	627	671	873	695	852	827	908	712	666	806	664	789	450	696	562	522	353	636	611	685	611	808	591	718	730	643	715	565	950	746	811	429	824	987	908	578	705	734	659
NANOS3	-0.418975	-0.901212	4.18154	0.0408666	0.601629	14	22	12	20	5	11	9	11	10	19	15	5	8	9	24	10	34	19	11	7	14	27	12	4	13	17	12	14	17	16	18	8	15	30	4	9	19	19	11	17	15	25	11	5
FAM118A	-0.323747	4.23253	4.17943	0.0409174	0.601629	320	259	510	672	533	310	402	285	446	435	349	589	375	560	563	175	412	520	305	150	319	496	385	361	278	568	291	587	904	337	308	353	344	534	356	417	864	421	458	589	279	567	699	776
PEPD	-0.262855	5.59731	4.17734	0.0409679	0.601629	1752	1597	983	2465	1980	752	933	801	471	815	1139	1467	777	1219	997	935	1371	1740	2063	905	1541	1410	1735	1198	2010	2742	875	1660	926	291	746	1049	1091	1062	501	634	1256	1662	1200	1426	684	1881	1362	2307
FGF9	-0.486428	1.39053	4.1764	0.0409906	0.601629	44	73	93	146	110	8	38	79	55	69	34	111	43	79	72	13	170	46	120	52	9	50	29	36	33	166	44	131	93	39	57	74	46	102	9	40	109	47	24	69	20	41	79	158
USP2	-0.358901	4.20314	4.17457	0.041035	0.601629	838	618	543	918	639	166	303	327	268	367	299	816	302	653	478	159	1205	703	730	305	218	361	211	269	688	1506	182	1006	833	277	512	498	613	495	235	410	869	548	311	597	196	541	618	889
WHAMM	-0.14468	4.42288	4.17175	0.0411034	0.601629	542	473	598	639	747	566	639	500	581	537	651	867	637	781	839	485	645	491	636	303	570	444	402	585	444	565	536	462	640	385	385	531	494	691	635	559	449	602	577	723	519	593	721	684
RRAD	-0.63157	2.33735	4.17047	0.0411343	0.601629	192	103	112	25	31	52	114	74	66	79	76	60	17	22	66	54	23	138	57	46	185	86	112	48	14	6	49	43	162	91	51	63	55	279	128	164	66	146	98	52	81	112	47	36
FBLN5	0.378252	2.96056	4.16931	0.0411626	0.601629	286	223	131	127	107	115	241	114	40	110	188	124	237	143	243	231	171	228	111	104	113	103	203	197	254	86	118	117	191	315	188	178	55	96	243	98	83	192	233	103	140	231	152	120
RASGRP1	-0.301733	4.03883	4.16767	0.0412025	0.601629	440	232	336	395	313	350	376	533	266	213	264	361	283	494	912	287	300	430	479	250	383	203	344	568	470	158	172	673	690	231	282	298	372	665	492	456	459	427	257	310	345	397	244	312
DENND5A	0.184557	5.18279	4.16691	0.041221	0.601629	857	657	717	835	805	832	794	805	684	753	845	893	726	913	1133	624	1174	898	1162	624	805	648	647	976	751	568	560	585	745	619	781	801	469	916	819	685	588	783	849	828	668	792	723	771
HMGN5	-0.464187	4.68587	4.16543	0.041257	0.601629	615	729	1213	1671	1159	463	1006	861	617	568	463	1271	808	1258	1553	450	1692	636	900	497	417	608	421	518	876	1308	406	1177	1141	350	664	576	1124	709	453	644	959	823	690	744	893	994	1041	1322
NCKAP5	-0.49715	2.49753	4.16217	0.0413363	0.602211	141	267	256	552	462	42	82	144	163	53	62	115	139	156	129	33	568	246	404	111	34	96	107	66	165	290	68	89	248	129	94	203	251	95	25	63	180	162	147	322	210	105	214	380
STT3A	-0.22489	7.75819	4.15491	0.0415139	0.603191	9243	9967	5204	6671	5520	5093	5903	5483	3836	4903	6685	6944	6143	6038	6394	4443	7650	4316	7416	3543	5203	4212	4713	5891	10437	10047	6582	5860	6098	4476	5141	5405	5486	5829	6870	5723	4910	6794	5638	7230	6964	7406	8099	6714
PLA2G10	-0.740368	0.619261	4.15424	0.0415304	0.603191	26	35	34	1	12	24	134	61	8	14	51	4	29	193	138	49	3	4	14	15	168	24	78	80	170	3	15	17	177	22	13	11	10	36	132	16	22	120	37	15	29	120	21	11
BAAT	-0.467215	2.33495	4.15301	0.0415606	0.603191	240	79	277	42	61	223	273	290	116	91	198	55	100	279	294	137	85	133	47	128	128	80	147	72	241	18	112	96	159	81	135	15	68	86	303	111	176	327	99	78	82	254	23	54
SIKE1	-0.143685	4.94843	4.15275	0.0415671	0.603191	895	790	829	806	828	619	761	929	766	677	687	767	649	891	847	636	1223	860	1117	502	611	669	705	817	883	886	830	867	1016	693	809	893	855	1040	827	917	890	925	721	907	671	970	877	1113
PAQR7	-0.256739	3.82599	4.15137	0.0416007	0.603191	474	377	570	262	293	265	510	300	234	224	324	178	310	637	695	164	279	507	411	176	258	241	294	456	840	440	404	332	384	176	232	304	271	361	521	289	456	452	223	342	263	550	304	474
CCDC148	-0.43921	0.705147	4.1477	0.0416912	0.603517	24	19	26	33	28	34	55	117	48	23	100	23	31	46	96	48	50	36	93	13	90	35	63	53	38	25	47	28	49	42	23	49	43	60	53	49	34	66	44	34	87	28	55	39
FAM43A	0.478115	1.77552	4.14715	0.0417047	0.603517	23	39	44	56	47	33	56	19	19	28	21	42	41	46	51	28	131	67	96	48	34	58	18	36	59	46	31	52	90	54	71	54	39	58	44	35	41	42	111	71	36	60	81	32
DHRS7	-0.32315	7.35446	4.14446	0.0417709	0.603517	6848	4661	5099	5861	5555	3962	5817	4168	2470	3829	5120	5988	3431	6292	5618	3553	5300	6552	7238	3010	6002	5180	6010	5970	6831	4317	4331	4573	4398	2686	4071	4596	4513	6486	3526	3907	4416	7029	4595	5973	4049	6175	5342	7205
LEMD1	-0.928047	-1.20915	4.14178	0.0418371	0.603517	56	39	2	0	6	0	70	18	0	0	6	5	2	6	0	0	3	49	17	13	6	2	30	9	9	0	0	3	12	0	2	2	13	34	18	23	8	29	1	6	20	22	11	7
HOXB2	0.583	-0.00784116	4.13918	0.0419015	0.603517	6	10	32	23	17	19	33	4	6	9	11	18	9	10	39	14	20	21	20	7	0	10	5	10	2	5	8	31	17	31	26	16	19	29	2	17	21	9	14	14	19	13	18	22
HJURP	-1.02913	-1.15081	4.13817	0.0419265	0.603517	5	10	51	0	1	1	23	12	0	0	13	0	0	14	23	0	0	108	13	2	1	26	16	38	5	8	0	53	21	9	10	7	21	9	24	2	23	22	11	1	3	35	20	11
BCL6	0.342873	5.23346	4.1373	0.0419481	0.603517	784	745	609	1058	930	672	927	813	787	377	694	658	806	810	679	508	1306	598	1286	574	485	578	467	1150	785	396	414	396	513	522	482	660	519	560	743	534	698	1054	694	606	475	644	558	811
TFG	-0.161882	6.67592	4.13604	0.0419793	0.603517	3501	2418	2545	3095	3001	2224	3391	2665	1667	2077	2456	3885	2961	3158	3290	2457	4572	1927	3273	1799	2493	2297	2205	3451	2621	2936	2359	2707	3820	2486	2088	2247	2551	2968	3059	3014	2566	4175	2990	2801	2397	3406	2256	2899
SFPQ	0.157217	7.17613	4.13359	0.04204	0.603517	3001	2507	2948	3604	4048	3660	3883	3793	3274	3790	3518	3657	2929	3432	3494	3048	4203	2558	4671	2451	3322	2472	2957	3275	1949	1939	2963	2648	4049	3192	3080	3481	3168	3500	3199	3382	3055	3189	3246	3457	2441	3114	3048	3710
BRPF3	0.257249	5.03844	4.13268	0.0420626	0.603517	619	618	630	702	843	599	737	522	465	495	652	805	605	826	692	557	928	582	811	584	484	489	558	474	543	561	591	707	859	552	466	665	663	592	605	523	675	604	699	515	471	727	671	640
CRABP2	-0.449567	2.07444	4.13217	0.0420754	0.603517	87	218	130	39	37	39	116	45	52	71	117	126	91	159	76	115	118	82	110	32	72	94	63	48	205	88	59	43	51	104	87	123	94	375	75	103	42	98	102	101	92	70	59	64
PPP4R4	0.351729	2.42873	4.13094	0.0421059	0.603517	80	91	219	229	248	38	64	91	59	115	102	105	150	80	76	54	314	198	130	62	31	37	85	74	116	169	61	154	288	106	59	176	168	82	54	144	125	63	113	182	128	94	191	272
DGLUCY	-0.254145	4.32159	4.12973	0.0421361	0.603517	705	900	467	497	428	307	584	500	245	357	445	252	318	503	440	313	555	676	509	313	469	492	466	488	1015	588	239	464	694	326	447	396	540	511	642	303	651	680	349	387	253	735	357	648
PDGFRA	0.475942	4.20585	4.12392	0.0422811	0.60419	647	1115	775	1240	758	609	720	563	517	513	633	536	879	516	642	879	2093	372	564	136	86	460	127	168	481	642	163	122	465	512	246	556	133	208	79	109	203	172	600	199	243	177	694	290
BBS7	-0.198906	4.13977	4.12343	0.0422933	0.60419	487	547	437	695	411	400	473	407	433	458	480	454	349	466	545	348	663	469	680	281	406	487	354	424	493	705	420	484	568	426	425	500	472	507	468	547	434	536	474	553	606	522	780	744
ZNF469	0.757113	2.09635	4.12195	0.0423303	0.60419	23	17	44	17	31	29	46	33	33	24	32	23	35	13	39	44	45	78	75	23	19	33	25	22	17	16	18	20	33	30	36	24	31	50	20	18	19	27	58	60	16	50	39	39
CD4	0.501656	1.02738	4.12023	0.0423733	0.60419	44	86	30	38	34	16	25	23	54	21	16	37	24	79	42	19	60	71	15	28	2	33	19	27	102	201	22	72	107	23	60	22	53	53	2	9	75	14	29	90	41	63	75	19
GUCA1C	-0.843256	-0.258449	4.11994	0.0423806	0.60419	32	58	3	5	33	11	31	104	34	62	95	58	66	39	54	35	3	9	12	24	30	5	29	54	4	0	43	18	10	1	32	3	11	5	20	26	12	8	38	5	24	18	17	4
GPR161	0.2929	3.10758	4.11178	0.0425855	0.606546	220	203	156	145	114	187	160	204	196	185	201	133	232	106	278	254	286	173	156	92	204	178	167	148	212	162	250	135	186	209	252	177	89	169	143	142	119	138	202	182	165	175	133	145
TSPAN11	0.825058	-0.677667	4.10733	0.0426977	0.607579	26	8	31	4	1	4	2	4	2	4	8	3	0	1	4	3	5	8	10	3	0	3	0	2	8	5	0	5	38	9	18	9	2	18	0	1	20	6	10	3	0	7	4	10
PREX2	0.52712	-0.120319	4.0929	0.0430637	0.612216	16	10	28	34	31	3	1	30	15	11	26	25	35	25	27	17	56	30	3	21	11	4	8	12	7	21	21	47	25	14	17	18	11	18	0	16	8	7	26	48	16	8	24	28
LCN10	-0.856491	-0.34091	4.09071	0.0431195	0.612441	12	23	0	21	13	0	3	12	29	20	11	143	0	17	52	11	23	12	11	0	22	14	12	0	7	23	5	14	6	0	7	8	30	38	0	22	13	76	20	13	2	4	7	39
TRIM67	0.712323	-1.06076	4.08642	0.0432292	0.612645	0	9	0	0	0	2	0	0	0	0	4	5	0	13	1	0	40	6	8	3	1	12	3	8	13	23	0	8	28	17	6	23	12	2	1	3	18	8	10	19	7	17	3	20
OPRM1	0.677814	0.369042	4.08532	0.0432573	0.612645	17	55	84	40	33	11	2	10	30	12	1	7	58	21	14	3	58	30	22	20	13	36	10	23	84	124	8	25	40	49	11	17	26	3	7	4	46	1	22	12	55	13	56	141
SEPTIN2	-0.160913	8.33938	4.08478	0.043271	0.612645	8016	11328	7787	7804	7780	6261	8621	7465	5833	7332	8573	9636	7812	11731	9954	6410	7507	8087	10554	4367	8444	6325	7375	10867	12240	13580	8176	7761	9520	6579	7658	8801	8407	8403	8069	7816	7318	10887	8839	11607	11617	14005	10170	10017
SPINT2	-0.180801	7.96833	4.083	0.0433167	0.612645	6203	5688	7137	9728	6580	3926	5619	5396	3829	4383	4606	6905	4862	8212	7509	4825	6361	5256	5727	3712	5607	4387	5089	5498	8095	6835	3422	5755	8282	3109	3772	4925	7050	6729	4290	5321	6044	6758	6515	5917	4798	7134	6516	9116
CH25H	0.768547	-0.855335	4.08232	0.0433341	0.612645	13	41	6	26	11	0	25	15	0	0	3	0	39	4	0	3	36	22	13	0	0	35	13	16	35	21	25	0	5	5	7	7	0	24	0	0	8	15	45	3	18	4	1	7
MACROD2	-0.317433	2.03021	4.07964	0.0434029	0.612709	52	61	149	100	85	50	207	77	76	37	59	115	51	151	230	54	144	85	118	67	64	86	62	191	83	77	45	220	143	34	71	55	160	99	105	150	126	108	73	63	60	98	139	117
FOXC1	0.387154	2.75129	4.07891	0.0434215	0.612709	153	137	78	48	39	202	167	117	163	132	218	133	163	123	186	250	72	98	117	82	294	89	119	106	241	47	120	53	145	121	127	97	60	76	192	110	81	177	221	72	122	156	145	84
GDF9	-0.265068	3.56079	4.07746	0.0434588	0.612709	427	340	495	501	387	256	616	334	137	247	431	438	376	560	577	317	508	383	409	147	482	357	217	400	380	326	194	209	327	158	255	172	294	315	342	202	304	386	216	296	460	412	320	394
SERGEF	-0.24567	3.77243	4.07452	0.0435347	0.612947	314	438	351	585	508	220	264	220	179	201	312	495	239	428	368	258	477	239	282	219	254	245	264	415	571	817	175	671	466	167	281	234	396	272	162	281	443	262	369	386	390	458	446	573
HAPSTR1	-0.162445	6.66035	4.0737	0.0435558	0.612947	2922	2457	3399	4412	3295	2138	2547	2604	2355	2452	2773	3845	2507	2972	3929	2137	4116	1924	3726	2169	1887	2250	1814	2486	2884	4839	1875	2885	2634	2430	2526	2841	2178	2763	2142	2591	2455	2701	2665	3298	2656	2909	3481	3368
NRP2	0.412065	3.98358	4.06773	0.0437099	0.614126	201	408	368	531	539	122	267	145	207	176	255	567	317	145	326	250	845	723	738	309	45	560	77	168	171	437	409	361	458	374	352	644	236	494	44	147	373	202	502	708	420	322	553	339
AKTIP	-0.18676	5.26835	4.06735	0.0437199	0.614126	1250	889	1182	1543	1062	746	1119	947	501	987	1040	1400	827	1487	1272	737	1409	1118	1165	645	889	923	854	917	923	1001	806	1630	1362	877	1009	966	1247	1236	953	1077	1152	1169	868	1216	992	1202	1301	1467
KLF7	0.280474	6.18442	4.06195	0.0438598	0.614817	2221	3021	1267	1666	1950	2278	1901	2074	2029	2065	2101	2042	2167	1143	1939	2135	1810	1974	2430	1503	882	1196	1472	1176	2550	2266	2227	1601	1581	2326	2200	1936	1706	2341	1579	1926	1337	1709	2201	2148	1652	1298	2156	1522
FGF7	0.546747	1.55628	4.0612	0.0438792	0.614817	70	243	99	87	69	20	48	53	33	19	20	36	139	41	88	66	597	58	75	28	27	36	20	106	116	71	19	46	95	121	23	64	37	141	15	25	55	43	114	54	138	44	92	33
TM6SF2	-0.667044	-0.635614	4.06068	0.0438929	0.614817	21	8	13	73	13	6	2	28	1	9	0	16	2	6	17	6	17	9	21	1	0	11	4	0	5	23	1	17	21	2	2	2	10	37	6	6	7	11	5	7	19	17	9	25
SUN1	-0.1653	6.71328	4.05878	0.0439423	0.614817	2299	2170	2098	3631	2603	1737	2375	2446	1969	2457	2224	3127	1619	2690	2244	1722	3341	2999	3285	1884	2437	2259	2515	1945	1955	2948	1473	2632	2355	1664	1828	2701	1875	3300	1843	2220	2468	3764	2217	3233	2185	3117	3132	3614
UBR2	-0.11246	5.66867	4.05409	0.0440645	0.614817	1092	1159	1353	1858	1674	1150	1403	1674	748	1154	1310	1522	1255	1589	1856	914	1830	1094	1725	958	1050	1031	1223	1457	1123	1236	915	1540	1469	854	1128	1288	1283	1461	1049	1221	1355	1454	1297	1368	1249	1538	1335	1694
APCDD1L	-0.651848	2.9247	4.05273	0.0440999	0.614817	168	63	87	266	106	118	97	186	49	38	82	288	59	433	194	30	93	84	447	117	58	122	116	75	30	106	42	442	328	90	143	214	319	386	17	83	328	126	62	99	64	146	156	186
GOT1	-0.253667	6.15776	4.05052	0.0441578	0.614817	3565	2773	1838	2139	1750	2109	2342	1836	1434	2093	2844	1985	1860	3036	2001	1541	2576	2269	2552	1007	2317	1478	1787	2140	3061	2382	1387	1952	2076	1855	1803	2000	1780	2065	2758	1982	1598	2653	2027	1704	1657	2842	2370	1947
RAB5A	-0.174603	6.10551	4.05011	0.0441684	0.614817	2721	1984	2191	2414	2134	1532	2009	2114	1496	1357	1593	2028	1297	2238	1988	1314	2658	1860	2408	1246	1766	1593	1436	2032	2105	2211	1162	2235	2688	1706	1696	1630	1916	2456	1963	1630	1975	2875	1915	2100	1334	2440	1963	2376
CLDN5	0.823295	-0.445096	4.04729	0.0442424	0.614817	4	12	7	21	32	8	10	3	5	0	8	13	11	8	11	11	53	2	6	9	0	4	0	0	2	7	11	4	0	3	10	7	1	2	0	6	2	4	5	5	9	0	8	2
FANCF	-0.197652	4.5062	4.04725	0.0442433	0.614817	643	718	698	1061	1247	352	427	450	344	439	554	1001	499	643	632	417	978	610	733	279	341	470	475	352	737	1599	459	681	400	315	422	596	527	786	315	451	623	731	496	701	407	656	592	799
NDUFA10	-0.185427	5.88592	4.04707	0.0442481	0.614817	1704	1518	991	1467	1913	1039	998	1017	1061	1114	1742	1525	1321	1465	1093	1287	1361	2314	2103	1332	2328	1434	2023	2091	2471	2132	1384	1328	1394	624	1075	1793	1186	1413	872	1079	1081	1780	1864	1746	1373	2231	1699	1602
MUC6	0.597896	4.36101	4.04694	0.0442514	0.614817	267	154	133	155	332	448	310	294	530	707	477	312	359	320	129	471	580	409	473	235	285	111	346	102	247	38	123	51	63	416	294	407	108	321	191	788	255	674	268	132	75	304	201	269
B3GALNT1	-0.24795	3.60334	4.04479	0.0443079	0.615044	304	276	337	349	335	281	184	292	158	278	238	496	227	343	476	242	353	234	252	193	215	226	327	269	365	711	207	385	442	192	323	360	350	269	309	285	366	382	291	444	321	405	535	612
STARD13	0.164224	4.61402	4.04263	0.0443646	0.615272	397	676	428	915	657	393	524	699	588	677	473	606	548	575	504	379	920	591	982	390	469	521	409	465	361	655	527	513	714	482	531	785	628	816	411	688	532	560	705	835	570	480	799	864
ACE2	-0.565933	1.87278	4.0394	0.0444496	0.615638	196	187	111	96	38	31	243	116	2	47	54	6	109	97	120	38	58	28	109	81	146	32	97	166	62	10	14	46	101	37	50	60	62	302	128	154	23	927	53	44	48	95	63	77
DDX4	-0.688196	-1.58981	4.03857	0.0444715	0.615638	10	2	6	26	0	17	9	15	5	1	6	15	16	0	17	2	10	5	4	4	15	11	15	0	5	4	21	2	1	5	3	2	17	4	16	14	14	6	3	5	14	11	21	12
FMNL3	0.347731	3.62835	4.03619	0.0445343	0.615951	272	307	237	404	280	117	250	144	153	136	182	205	208	142	222	132	484	427	396	155	86	276	100	158	210	416	200	326	350	220	262	268	213	249	101	135	271	176	228	421	213	279	253	244
APLNR	0.731908	0.272601	4.02867	0.0447331	0.618142	28	57	29	106	8	4	23	6	20	2	2	21	19	5	18	25	53	23	99	18	0	13	4	6	14	63	7	12	3	26	62	27	21	18	1	3	14	16	33	72	14	35	48	1
NKX2-3	0.756623	-0.521774	4.0233	0.0448759	0.618778	7	3	21	20	18	0	5	4	19	17	4	4	9	9	21	8	9	37	30	8	0	23	1	1	6	11	6	31	4	15	38	40	14	22	0	9	25	0	22	7	4	10	34	11
FAIM2	0.668619	0.648558	4.0217	0.0449185	0.618778	16	63	62	77	52	0	4	20	2	3	8	81	3	12	10	15	70	40	18	15	3	23	0	28	86	84	0	64	48	6	19	8	64	18	2	22	42	68	41	38	0	14	32	108
SUPT20HL2	0.772501	-0.956369	4.02115	0.0449331	0.618778	0	39	17	73	10	2	9	0	9	4	5	0	19	8	1	0	68	5	21	0	0	24	3	1	3	17	14	22	14	17	14	34	6	1	0	0	3	1	11	13	9	18	22	5
PHEX	0.326171	0.513098	4.02021	0.0449581	0.618778	22	25	40	25	58	46	37	33	22	67	34	36	18	48	25	40	39	8	66	23	31	29	12	32	34	15	28	31	44	17	33	45	31	43	44	33	7	49	19	75	22	54	38	51
TET1	-0.362845	2.27211	4.01933	0.0449815	0.618778	86	72	195	221	166	119	159	177	87	97	104	217	71	178	310	86	120	158	153	99	23	131	125	90	186	165	78	257	285	76	165	61	166	213	67	220	180	142	108	147	131	179	163	244
RCBTB2	-0.380291	4.23107	4.00376	0.0453989	0.622935	363	486	541	1081	697	222	334	451	311	459	282	816	363	521	540	329	821	433	638	257	162	452	296	314	579	1022	231	1301	706	342	577	416	528	756	126	663	980	472	474	822	467	633	586	1127
FOXJ1	0.677684	0.716221	4.00264	0.045429	0.622935	7	20	35	31	28	5	20	11	13	14	9	33	12	18	19	8	29	5	31	10	2	20	17	8	17	22	12	38	13	10	6	27	42	12	1	15	30	4	6	24	11	13	49	33
COL6A6	0.645475	-1.63919	4.00211	0.0454434	0.622935	0	8	8	8	0	1	1	11	2	3	7	1	1	0	0	7	16	5	7	7	1	7	0	10	18	12	5	21	6	3	12	4	8	7	2	3	12	0	2	10	0	3	3	10
VKORC1	-0.225258	6.14858	3.99621	0.0456026	0.622935	2463	2007	2315	3540	2233	1560	1872	1579	1179	1639	2211	3507	1643	2545	2286	1806	2900	2100	2074	1209	1672	1887	1575	1796	3041	2652	1497	2173	1446	735	1527	1500	1643	1920	696	1382	1606	2468	2079	2310	2613	2080	1975	2794
GCDH	-0.193552	3.28316	3.99355	0.0456748	0.622935	348	479	212	269	322	255	246	207	242	227	323	307	148	252	250	242	277	221	369	175	240	237	201	199	368	421	284	269	271	130	271	211	222	237	248	219	174	348	181	211	157	271	228	213
LHFPL2	0.267416	5.1214	3.99308	0.0456874	0.622935	740	749	636	701	567	750	959	734	576	987	926	551	840	580	848	649	1111	778	710	515	804	724	618	852	510	316	877	389	1128	999	869	933	655	1145	983	816	558	812	785	742	705	769	755	491
TLR5	-0.35439	1.98652	3.99185	0.0457209	0.622935	104	112	139	125	61	66	136	151	42	77	71	107	125	116	191	64	91	46	53	38	100	29	84	128	158	125	78	82	85	47	58	72	82	39	115	74	73	148	44	33	55	138	56	93
THSD7A	0.314091	3.03195	3.99043	0.0457594	0.622935	242	258	180	155	142	143	273	305	258	90	95	163	111	386	180	69	265	369	193	147	303	178	188	322	159	194	63	165	291	136	102	261	153	160	287	253	266	116	144	228	208	172	116	249
BCL2A1	0.493163	2.22853	3.9904	0.0457601	0.622935	70	150	133	155	93	59	129	107	79	62	167	42	195	74	190	101	372	152	323	60	34	129	49	122	288	65	102	51	188	118	125	272	84	142	101	128	130	85	95	80	268	127	122	84
DNAJC28	-0.318164	1.99184	3.98953	0.0457839	0.622935	70	108	174	205	126	85	128	128	72	136	102	136	117	95	138	94	183	87	109	61	120	65	66	96	152	223	41	157	126	87	100	85	113	99	90	102	151	154	97	158	90	163	123	196
MRS2	-0.196573	4.63699	3.98861	0.0458088	0.622935	805	560	506	834	796	671	562	599	467	856	820	1052	678	1022	517	612	404	600	847	480	690	473	739	743	774	748	599	590	455	376	492	783	595	549	374	629	510	687	1032	985	710	790	794	928
MEI4	-0.365767	1.76706	3.98749	0.0458392	0.622935	60	71	123	259	63	70	40	62	29	108	40	200	65	134	171	42	153	87	80	100	33	38	55	44	70	133	25	91	39	43	72	39	110	86	13	124	106	118	103	186	119	78	105	230
C10orf143	-0.296691	1.62335	3.98671	0.0458604	0.622935	78	66	95	120	80	70	63	102	65	74	64	124	77	126	85	45	152	59	129	53	67	61	37	80	106	209	87	147	91	65	82	59	102	103	50	64	121	55	54	127	42	112	98	142
CANX	-0.139982	9.22075	3.98615	0.0458759	0.622935	18194	12992	13267	15411	16835	13896	16954	14622	12990	15390	16823	17553	14666	17608	19600	11323	18908	11713	17293	10011	13210	10726	11325	19006	13988	14345	12015	11372	14394	11306	11714	13340	12306	14163	15292	13674	11070	17076	14812	17495	16964	19155	17330	14958
LIG4	-0.16566	5.06277	3.98546	0.0458945	0.622935	946	841	1004	1381	1007	716	1184	945	670	952	985	999	878	1047	968	610	1443	512	1110	660	655	590	732	880	822	1037	741	739	852	763	566	692	822	989	1032	1022	902	1004	945	1300	1125	1020	1430	1184
FRMD4B	-0.233922	4.57888	3.98083	0.0460209	0.624097	693	714	559	391	320	622	795	815	492	403	609	363	640	749	604	575	420	569	854	440	854	420	453	967	657	602	585	445	706	545	585	671	514	793	906	851	552	942	645	482	735	759	1008	399
GSTM1	-0.576894	4.08918	3.97672	0.0461332	0.625066	837	692	311	615	498	672	244	262	134	118	628	421	1887	369	1151	598	130	234	131	661	966	509	865	1082	1236	449	104	628	271	69	106	422	795	153	1231	618	183	466	483	386	390	1196	587	283
BEX1	-0.521227	7.39685	3.97313	0.0462317	0.625582	4614	4504	5692	18343	12965	1808	2858	3447	2819	3227	2576	12448	2950	5481	4115	2329	12634	5626	8772	3054	1451	6097	2019	1580	4964	12297	1757	8471	4006	1310	3478	4389	6677	4867	321	3613	6440	3527	4006	9382	4645	5673	7181	10013
CCL18	0.677059	0.790501	3.97142	0.0462789	0.625582	8	57	81	89	36	6	27	59	4	8	46	39	4	5	64	129	189	63	24	20	9	20	10	20	15	29	26	44	76	44	34	51	24	107	48	13	32	0	90	54	12	124	23	71
LRRC74A	-0.559792	-1.07443	3.97064	0.0463001	0.625582	9	2	5	73	6	7	14	17	8	33	9	32	16	12	23	25	16	1	3	9	10	8	6	10	12	18	7	9	3	4	23	5	12	12	0	22	8	11	14	17	23	4	16	14
PDIA4	-0.212866	6.89865	3.96825	0.046366	0.625582	3380	2861	2683	3097	3543	2714	3188	2937	2628	2459	3435	4077	3012	3863	3483	2387	3757	2886	4900	2300	2848	2643	2839	3536	3216	3158	2915	1500	2079	1714	1905	2433	1735	2146	2461	2097	1594	3806	3342	3589	3175	4041	2801	2619
NT5DC1	-0.195117	5.54455	3.96789	0.0463758	0.625582	1454	1157	1409	1611	1309	1060	1546	1326	987	1090	1443	1428	1127	1713	1666	906	1782	1389	2037	793	1179	1086	1309	1373	1556	1278	899	1731	1363	819	926	1187	1343	1442	941	1237	1372	1576	1241	1520	1419	1631	1561	1804
KRT81	-0.559551	1.26485	3.96329	0.0465027	0.626742	88	103	11	47	55	57	113	40	91	106	215	57	69	1	39	31	3	161	174	67	77	21	56	22	20	49	126	77	19	70	74	61	26	68	19	103	10	55	18	140	63	47	133	22
SLITRK6	-0.637503	0.426324	3.96152	0.0465517	0.62685	45	22	36	19	71	2	51	40	1	8	9	44	19	43	31	36	121	30	27	4	4	35	0	29	34	54	0	22	61	8	30	39	23	27	0	72	80	35	39	47	32	39	71	206
MEAK7	-0.172431	3.74011	3.9581	0.0466463	0.627145	490	643	269	440	368	270	314	340	276	256	353	301	269	262	389	217	261	348	510	232	307	261	210	337	568	392	359	391	412	293	324	366	252	498	303	409	322	482	265	363	316	318	455	338
SLFN11	0.367751	1.92054	3.95737	0.0466665	0.627145	16	198	130	82	114	56	72	80	54	42	92	83	103	54	99	75	144	149	123	71	10	98	46	53	99	197	88	110	90	97	89	39	104	51	27	87	91	11	118	147	130	116	169	88
KDELR2	-0.158979	6.72938	3.9544	0.046749	0.627145	2464	1781	2464	2705	2983	2173	3269	2659	2149	2650	3035	3370	3019	3462	4239	2226	3530	2044	2835	1942	3366	2060	2396	2755	1544	1612	2033	2272	3265	1958	1918	1989	2113	2660	2888	2517	2122	2650	2611	2594	2862	2914	2621	2401
NUP214	0.134555	5.38911	3.95413	0.0467566	0.627145	1103	1253	818	1259	1162	820	846	1090	728	757	862	982	791	863	1082	613	1339	1001	1406	655	607	679	711	934	1265	1359	801	1273	1310	908	903	1031	885	1155	1056	1050	915	973	852	935	728	902	1254	1172
SPNS3	-0.770959	-1.42153	3.95333	0.0467786	0.627145	5	19	1	1	0	5	42	12	4	0	5	7	2	13	10	10	0	10	0	12	8	4	0	8	16	0	0	4	15	1	7	3	9	12	3	3	4	19	2	1	18	16	9	9
STAT5A	0.282882	3.66591	3.94893	0.0469013	0.628239	409	271	167	322	298	192	254	236	157	129	307	222	334	230	171	270	477	249	332	174	307	212	171	138	186	177	242	188	315	227	237	324	220	232	222	211	233	217	203	291	154	225	274	234
DNAH11	-0.569738	1.37825	3.94261	0.0470777	0.629801	55	51	33	16	53	55	73	71	51	56	101	40	70	45	104	64	18	34	93	46	112	42	62	120	77	10	31	42	47	56	40	39	45	42	103	63	31	55	52	15	47	63	35	22
DACH2	-0.633241	3.27442	3.9418	0.0471002	0.629801	191	309	207	883	603	89	110	234	101	205	135	431	232	271	254	71	570	185	474	46	65	327	82	73	198	779	165	400	236	106	243	316	286	553	3	310	514	325	131	581	223	303	466	713
CCN3	-0.42999	2.2737	3.94006	0.047149	0.629903	109	64	55	118	117	60	167	196	136	152	103	45	103	84	87	97	193	134	76	47	156	73	80	78	53	20	28	80	134	88	105	127	64	215	92	113	31	177	111	68	65	93	98	50
MISFA	-0.236969	1.99487	3.93767	0.0472162	0.63025	93	118	81	151	111	63	92	118	54	77	75	112	66	113	135	62	214	117	147	51	79	112	71	111	117	182	60	87	114	69	106	125	124	142	106	107	155	164	105	106	204	143	153	149
AFTPH	-0.126015	5.68941	3.93366	0.0473289	0.630302	1094	1065	1355	1771	1637	1052	1522	1366	1129	1142	1449	1519	1339	1850	1800	945	1785	1164	1607	909	1146	892	1081	1276	1141	970	971	1238	1617	876	948	1100	1155	1227	1143	1169	1103	1378	1315	1450	1304	1603	1445	1540
SEC14L1	0.245247	5.20601	3.93332	0.0473384	0.630302	625	1034	757	947	765	467	657	507	662	438	699	674	507	703	685	513	899	787	868	461	577	657	526	530	974	1000	575	916	1105	470	673	781	878	828	370	672	733	738	742	1005	594	745	1108	1001
CD53	0.456198	2.79296	3.93283	0.0473522	0.630302	140	239	350	240	140	123	152	216	55	109	84	66	251	153	464	320	239	295	175	114	29	175	51	118	446	197	104	223	315	236	193	227	181	187	99	103	220	131	115	57	219	220	153	152
GABRB1	0.629302	-1.31262	3.93073	0.0474114	0.630302	2	13	3	20	29	3	12	20	9	9	9	6	6	8	5	8	17	8	11	0	1	7	14	4	5	7	0	8	14	2	3	1	13	7	5	0	24	6	5	16	5	5	4	18
MAGED2	-0.327421	8.17451	3.93021	0.0474261	0.630302	9070	12260	10796	11722	10008	5428	6872	6604	4384	4722	5604	11545	6640	10733	10016	5210	10857	8013	10736	4276	4310	7109	6824	7009	13233	19339	5014	13765	12443	5433	6588	5070	11106	9752	5302	7957	11678	9730	7497	10656	6628	11802	11520	13282
PATL2	0.329489	1.25646	3.92627	0.0475374	0.63045	39	69	47	109	64	40	45	65	14	24	25	35	21	65	15	29	129	43	110	26	56	33	29	25	63	194	14	38	53	14	37	96	141	69	77	64	70	78	64	40	63	38	39	83
MS4A7	0.464439	2.08907	3.92531	0.0475645	0.63045	55	226	245	173	100	20	154	115	30	29	36	28	87	64	182	185	179	112	97	58	11	151	94	56	144	160	31	109	145	152	131	104	101	151	29	47	159	44	234	58	154	201	68	100
APOL4	0.527943	1.37173	3.92494	0.0475749	0.63045	81	119	74	518	80	50	41	13	16	3	42	39	75	15	113	34	185	29	50	3	13	12	49	18	136	117	37	33	45	13	32	19	22	28	12	67	101	9	75	45	62	23	41	180
PMS2	-0.158397	3.49084	3.92398	0.0476021	0.63045	294	349	287	305	235	191	294	282	244	225	245	297	257	237	282	183	389	286	264	117	246	212	179	249	426	543	174	344	303	254	256	255	237	368	264	337	287	236	393	330	228	344	357	422
NUSAP1	-0.458103	1.64257	3.91688	0.0478036	0.631062	91	26	373	83	115	47	100	157	19	24	75	18	26	116	266	61	50	201	99	52	74	41	92	137	113	33	90	164	230	60	37	58	58	59	84	49	272	126	55	41	43	231	40	149
SCOC	-0.325734	7.58294	3.91543	0.0478446	0.631062	5195	4378	7648	7054	5866	4205	6873	5635	3670	4407	5807	6615	5164	9340	10846	4370	8689	3852	7262	2996	4621	4286	4674	8522	6041	6228	4462	5439	6840	4202	4002	4329	5343	5577	6280	5200	5935	7219	4952	6143	10351	7600	7025	7120
MCM8	0.181561	2.69464	3.91518	0.047852	0.631062	193	187	89	155	148	119	168	189	79	80	151	176	143	95	179	97	239	135	117	110	62	101	166	94	161	164	205	178	206	130	193	154	195	154	175	153	150	127	102	263	90	168	152	138
PRCP	-0.212727	6.30079	3.91416	0.047881	0.631062	2532	2529	2935	3504	2478	1454	2291	2399	960	1825	1731	2769	2064	3460	2958	1612	3759	1851	2587	1234	1511	1718	1446	2621	3623	3297	1248	2257	2669	1448	1764	1573	1785	2238	1826	1821	2108	3238	2172	2528	1930	2745	2522	3183
CXCL12	0.544658	3.49646	3.91384	0.04789	0.631062	35	123	89	92	218	467	111	164	265	346	483	515	278	97	312	669	125	178	196	179	98	108	88	182	92	55	102	129	128	527	667	237	70	132	142	185	31	119	329	465	300	203	180	38
TMEM141	-0.23747	5.57567	3.91162	0.0479534	0.631062	1805	1499	1771	1822	1416	1011	1577	1017	805	1097	1364	1205	1159	2346	1974	855	1880	1882	1426	667	1419	1020	1073	2258	2210	1515	930	1363	1476	765	862	952	1291	1503	1236	1006	1089	1637	1086	1304	1842	1650	1514	1286
SLC10A5	-0.4019	-0.299169	3.9105	0.0479854	0.631062	38	8	83	27	18	16	16	32	3	8	13	19	12	38	31	25	23	10	16	18	17	12	30	28	12	37	19	27	39	15	15	10	16	17	20	11	48	35	14	11	37	33	20	33
ARK2N	-0.163508	4.54703	3.9089	0.0480311	0.631062	618	328	725	835	460	566	678	778	725	650	448	636	500	699	800	339	902	635	858	414	404	419	600	663	285	366	389	667	682	539	397	627	624	713	569	702	574	867	1003	773	730	573	712	855
PDP2	-0.181205	3.58417	3.9067	0.048094	0.631062	357	371	240	379	363	407	330	224	299	273	500	251	314	298	370	258	360	288	321	130	280	237	168	201	307	528	245	275	262	239	291	319	260	365	342	263	219	270	251	267	157	343	373	322
ECHS1	-0.264364	6.49965	3.90624	0.0481072	0.631062	3901	2269	2462	4354	2683	2334	3101	1639	1998	2304	2519	2764	1692	4141	2213	1932	3611	2627	3564	2132	3401	2123	2802	3013	3288	2756	1737	3814	2039	1187	1968	1793	1941	3292	1212	1580	1939	3615	2910	3847	2395	4097	3006	2784
IGDCC4	-0.491995	0.950571	3.90309	0.0481974	0.631062	70	23	50	36	13	34	132	115	17	44	59	38	19	32	101	19	32	41	150	41	120	34	51	33	20	12	50	31	39	68	21	31	45	73	97	67	50	59	26	30	1	96	25	44
SPSB1	0.399339	4.31521	3.90272	0.048208	0.631062	361	308	218	403	309	417	333	312	266	278	400	329	386	184	353	410	435	352	363	212	232	246	279	253	267	164	309	222	328	261	349	340	193	304	230	316	257	272	341	344	206	247	386	220
PPM1E	-0.519889	3.17032	3.90147	0.0482439	0.631062	158	203	213	564	363	66	156	225	135	132	97	494	83	247	122	62	764	224	283	119	29	178	47	13	123	255	86	353	180	135	183	251	197	288	14	167	188	203	135	368	155	159	219	474
SUMO4	0.559135	-0.795134	3.89935	0.0483048	0.631062	2	16	10	29	28	3	18	23	14	3	10	13	7	4	15	10	24	26	9	6	6	11	2	22	8	5	13	18	38	16	17	6	10	18	3	17	7	17	19	15	9	14	17	27
TMEM72	-0.712214	-0.464103	3.89867	0.0483242	0.631062	4	3	10	16	19	3	28	17	10	19	3	17	2	10	15	0	2	23	8	3	19	5	8	14	3	19	4	93	26	0	9	10	25	4	17	4	29	20	0	12	12	21	23	7
AS3MT	-0.448823	1.86325	3.89684	0.0483771	0.631062	132	100	132	40	54	43	215	101	35	74	121	43	48	252	272	114	27	68	59	49	110	56	66	158	173	34	49	53	97	36	27	12	58	79	120	42	75	103	66	28	90	165	44	49
USP32	0.195757	4.74656	3.89657	0.0483847	0.631062	626	513	598	776	595	541	665	603	362	432	471	473	427	619	614	289	767	835	739	347	586	436	511	534	495	366	502	475	815	434	638	576	549	659	519	529	621	636	558	528	468	532	635	812
CACNA2D3	0.378268	0.609409	3.89636	0.0483909	0.631062	9	38	24	107	25	7	14	49	27	36	18	56	25	20	67	18	60	25	31	23	39	33	10	12	42	30	36	33	63	20	30	32	64	30	18	38	34	13	51	67	20	30	42	37
SDK1	0.493132	4.53292	3.89301	0.0484875	0.631462	245	259	415	531	688	164	325	190	255	192	186	447	188	708	491	198	472	290	508	299	181	225	170	205	167	326	112	681	452	146	316	231	604	335	158	262	539	281	315	441	164	311	361	572
LIPH	-0.275494	5.91345	3.89118	0.0485402	0.631462	2605	2923	1018	1443	1161	1048	1673	1957	592	958	1321	986	1039	1373	1180	950	1183	1936	3657	1058	1777	854	1260	2120	3526	1593	1235	1302	1376	994	1009	1184	1804	2593	2442	1683	1928	3793	1575	1805	1476	2422	1328	2212
SULT1A2	-0.467279	1.11613	3.89085	0.0485499	0.631462	113	44	115	35	13	38	169	67	8	34	69	18	41	118	68	48	28	153	21	50	118	39	108	138	152	29	36	49	94	44	28	20	52	48	114	31	57	108	47	22	40	103	41	45
SPOCD1	0.466566	1.22337	3.88957	0.0485867	0.631462	54	68	71	13	33	47	48	36	22	38	41	32	20	35	41	21	31	110	45	37	14	63	23	53	18	35	86	40	64	60	72	59	56	75	35	31	47	29	38	82	33	61	71	55
NDUFAF3	-0.33189	5.63076	3.88585	0.0486947	0.632329	2468	2129	1041	2742	2174	586	1010	846	636	750	1083	1585	982	1399	869	1106	2511	2408	2110	1086	1073	1538	1309	1087	2908	3592	1425	2024	965	406	1247	1299	1608	1378	426	863	1275	1354	1593	2176	1119	1504	1444	2042
TBC1D8B	-0.215816	4.25778	3.88328	0.0487691	0.632422	339	500	580	932	572	287	436	455	338	366	288	752	357	630	681	231	958	346	506	284	332	283	331	517	657	620	305	596	687	332	523	448	453	547	363	395	599	520	393	569	507	743	545	812
NAP1L1	-0.165935	8.0906	3.88275	0.0487846	0.632422	8607	5476	6607	8012	7594	6023	7705	6730	5224	6925	7682	6612	5191	7073	8953	5484	7554	7565	11536	5213	8621	7025	6894	9106	9245	7069	5385	6372	6248	4260	5228	7898	7458	7416	5595	6976	7275	8409	7475	8551	8457	9131	8949	8967
CPNE4	-0.521165	3.74921	3.87889	0.0488968	0.63334	323	454	593	794	755	53	285	286	281	221	124	611	182	317	199	152	713	439	622	171	110	411	283	77	553	801	73	838	703	223	388	417	664	438	45	372	626	354	235	915	331	329	734	981
ZMAT4	-0.738193	-0.404643	3.87322	0.0490624	0.634467	0	0	24	33	8	5	15	46	3	6	0	45	7	64	33	18	50	10	26	0	1	22	27	2	6	1	4	58	8	6	16	10	18	28	4	33	25	41	7	48	41	25	24	34
CD300LF	0.545284	0.456469	3.87307	0.0490668	0.634467	23	27	48	41	45	12	32	33	3	22	3	19	13	53	78	51	27	39	31	16	3	39	20	23	103	42	13	13	133	17	50	43	24	59	15	22	48	37	36	21	19	44	42	33
HCCS	-0.211289	4.26303	3.86775	0.0492225	0.635801	771	709	374	685	476	401	571	461	501	422	693	603	561	526	371	436	584	521	829	364	688	499	657	503	612	580	416	321	497	332	522	532	504	691	414	424	387	754	478	644	529	572	675	522
ESYT1	-0.197234	6.94263	3.86622	0.0492673	0.635801	3934	3644	2457	2480	2476	1960	2615	2140	2150	2426	2748	3609	1833	3239	2724	1984	2258	2912	3717	2138	1738	1955	2142	2046	3181	6218	1896	4588	3942	1912	2651	2505	3215	3837	1855	3309	3203	3653	2400	3659	2348	3239	4094	4381
PTGES3	-0.144845	7.45011	3.86529	0.0492946	0.635801	4819	5217	4035	4244	4331	3782	5356	4395	4099	4543	5022	4702	3775	5421	5265	3501	5499	3178	6692	3195	4636	3840	4054	5529	5566	4930	4256	4323	4881	3716	4291	5132	4610	4770	4300	4027	3241	5149	4091	5595	5422	5172	5959	4931
MLANA	0.374368	-0.869599	3.86349	0.0493475	0.635947	11	13	3	14	27	8	11	15	11	15	5	9	10	3	7	5	18	14	13	5	2	5	27	12	13	9	12	18	6	10	13	17	11	12	5	10	18	21	3	14	4	16	11	14
ADH1B	-0.727812	3.33596	3.85984	0.049455	0.636453	442	148	765	56	91	245	522	119	40	49	116	121	335	1190	762	171	99	181	83	128	1130	29	529	1182	1781	34	96	45	500	94	48	85	58	67	1022	33	225	830	83	104	143	826	273	352
GSTM4	-0.398978	5.55141	3.85821	0.0495031	0.636453	2043	2117	1624	850	947	2722	1503	2212	1211	863	1043	499	1377	2468	1647	996	467	1928	1239	1850	2567	933	2074	1541	2981	802	1237	880	1945	643	745	634	706	1574	2540	1389	1041	3403	994	646	596	2440	888	1715
PLS1	-0.277211	7.10494	3.85736	0.0495282	0.636453	4195	4685	4414	4260	3307	4258	5851	4403	2557	3986	4267	5528	3231	4895	5172	2252	3497	2898	6542	2739	3628	2535	3203	4662	4803	5414	3111	3477	4042	2758	3183	4466	3699	4226	5005	3988	3983	7161	3583	3788	5025	4658	5688	4401
COLGALT1	0.22706	5.13243	3.85526	0.0495902	0.636453	1829	1166	621	789	840	554	730	864	509	635	828	604	612	597	547	515	1143	653	1287	612	544	528	595	579	1505	892	790	739	1131	733	656	824	597	1035	481	444	518	578	644	619	496	664	694	749
FAM114A1	-0.253546	6.05066	3.85322	0.0496505	0.636453	2381	2826	1833	2058	1814	1194	2416	1935	1336	1410	1970	2155	1225	1808	2729	1644	2733	2132	2657	1600	1797	1478	2507	1866	2784	3647	1283	2065	2535	1104	1287	1340	1896	2671	1750	1527	1476	2451	1169	1774	1742	2422	1575	1719
DDC	-0.510879	3.90175	3.85	0.0497461	0.636453	337	534	791	722	500	102	374	267	323	416	288	735	342	502	519	143	297	311	587	188	107	362	158	95	512	1355	141	1300	745	228	270	168	1174	263	148	162	881	147	214	465	374	536	1266	456
SPEN	0.20914	5.97488	3.84988	0.0497495	0.636453	796	1049	1026	1870	1659	1040	1340	1185	1205	1171	1067	1405	1092	1195	1224	830	1924	1250	2087	1053	964	939	1014	941	1114	1213	1174	1646	1878	1308	1433	1478	1535	1603	1140	1338	1581	1422	1465	2037	801	1359	1535	2102
RBBP7	-0.107283	6.13111	3.84857	0.0497884	0.636453	1990	2049	1745	1822	1883	1372	2257	1805	1501	1350	1718	1843	1402	2370	2295	1577	1975	1571	2252	1203	1613	1574	1886	1688	1863	2092	1543	1816	2530	1569	1693	1577	1769	1991	1635	1717	1842	2096	1809	1979	1675	2133	2068	1974
APOF	-0.722327	-1.51318	3.84751	0.0498199	0.636453	5	12	6	32	30	1	1	8	9	6	1	10	3	1	30	4	8	3	4	0	0	8	0	0	11	25	6	1	19	4	9	14	28	17	2	5	14	4	2	11	13	8	8	39
PPP2R2A	-0.155741	5.13436	3.84739	0.0498234	0.636453	883	690	789	845	1057	621	1197	900	1054	817	1077	1177	706	849	1123	719	1022	831	1435	721	1135	671	690	1072	497	611	820	984	1112	796	641	927	673	918	802	810	777	1045	995	854	944	815	973	1067
RTL10	-0.280198	3.46837	3.84668	0.0498444	0.636453	816	614	280	178	300	108	205	179	167	114	161	158	191	239	249	145	245	220	242	117	300	261	182	277	640	588	322	191	316	107	249	217	237	242	278	211	244	309	206	294	163	230	301	333
BDH2	-0.312214	4.52316	3.84352	0.0499384	0.637121	512	594	1139	440	341	494	867	727	329	389	539	158	521	1232	1304	515	453	774	476	295	856	325	971	1737	1125	339	304	501	869	434	437	289	391	412	1295	497	644	1111	468	435	638	902	629	672
TMEM219	-0.189015	6.05614	3.84179	0.0499902	0.63725	2397	2134	2199	2159	1762	1387	2159	1528	1038	1220	2061	2003	1614	2676	2778	1491	1753	2092	2086	990	2090	1552	1654	2407	2694	2451	1657	1895	2004	907	1432	1067	1782	1671	1699	1306	1539	2237	1647	1716	1556	2739	1872	1962
SIGLEC6	0.544713	-0.620704	3.83579	0.0501694	0.63887	25	14	25	14	7	17	26	24	1	3	0	18	9	19	24	10	26	17	29	10	2	13	5	1	31	35	3	4	52	9	21	8	4	3	6	5	25	2	4	7	16	24	8	5
LRRC8C	0.322106	2.27787	3.834	0.050223	0.63887	64	120	116	188	112	97	109	65	96	99	43	156	94	78	144	67	199	81	164	78	20	78	63	81	51	106	112	137	103	102	153	94	72	117	11	95	80	67	196	181	144	52	179	100
VDR	0.227248	3.87685	3.83335	0.0502425	0.63887	543	560	331	426	348	279	284	370	241	189	227	219	405	270	424	377	487	303	434	154	286	174	272	285	815	684	350	350	320	318	337	305	309	434	425	282	293	285	363	261	216	411	312	353
HSP90AA1	-0.156952	9.88025	3.82841	0.0503908	0.640222	28182	23081	23223	25620	23441	25024	31548	24710	22514	30614	33440	27552	23899	24861	30664	19420	30316	20189	34226	15808	26372	21133	20645	22808	21091	17129	19907	17606	29880	18315	20679	24774	22845	28104	28888	27569	21589	29906	23335	26687	36454	25860	33623	24088
CACHD1	0.258648	3.38333	3.82515	0.0504888	0.640583	95	197	278	500	357	195	278	301	159	210	198	359	317	136	380	268	638	284	237	179	117	346	123	173	137	149	168	98	302	199	216	130	291	272	197	330	177	203	297	309	269	263	323	149
TNNC1	-0.608384	-0.352689	3.82382	0.050529	0.640583	85	22	13	4	29	9	27	9	8	27	3	7	4	23	3	9	0	42	10	11	20	4	64	11	10	15	1	17	25	0	4	1	13	59	17	14	30	72	27	11	14	22	21	21
PTPN21	0.19631	4.20595	3.82329	0.0505448	0.640583	385	303	319	378	386	360	466	422	315	442	331	352	307	434	547	351	575	380	509	311	498	317	411	359	221	278	358	305	540	396	371	343	338	428	428	381	300	361	443	414	293	301	435	453
EIF4E1B	-0.663799	-0.340893	3.81866	0.0506849	0.640963	28	21	16	51	31	6	7	23	26	4	7	26	4	7	1	11	49	11	10	16	0	12	11	9	10	75	3	41	18	5	28	7	15	25	0	8	33	8	4	38	0	17	19	23
STKLD1	-0.418677	-0.766363	3.81469	0.050805	0.640963	14	11	7	14	19	4	8	21	5	7	10	18	6	8	5	6	12	17	11	8	7	15	4	7	9	14	9	5	9	11	13	10	16	11	6	7	9	18	7	16	4	14	8	9
HSPB8	-0.417801	4.76439	3.81398	0.0508267	0.640963	788	776	474	150	254	571	872	662	442	736	763	386	414	594	576	542	207	522	545	360	1195	442	680	879	425	119	433	221	631	460	330	454	282	701	876	727	353	1044	651	411	446	709	434	324
ARL2	-0.213122	5.02406	3.81377	0.050833	0.640963	1445	1693	1065	1125	1009	569	806	579	487	702	905	710	630	971	847	574	1191	1043	970	469	669	762	647	603	1580	1810	526	1021	1066	436	703	611	1066	781	764	679	913	947	681	870	828	1065	1045	1311
GINM1	0.208105	4.70287	3.81348	0.0508416	0.640963	479	390	473	645	646	515	560	584	514	459	538	467	521	659	681	424	875	641	591	287	489	314	468	601	477	459	452	515	629	463	442	477	473	561	621	506	375	534	443	563	475	531	595	565
PCDHB2	0.346007	1.13	3.81338	0.0508446	0.640963	29	25	39	91	63	14	53	44	25	13	48	128	78	51	57	52	123	37	61	38	49	42	36	15	34	44	18	80	39	28	56	26	24	39	4	24	50	19	61	39	50	50	65	55
LILRB4	0.583158	0.699413	3.81261	0.0508681	0.640963	24	102	84	21	35	11	36	16	7	33	26	21	22	16	20	48	83	40	26	2	4	31	17	24	114	47	32	38	75	49	11	116	22	9	17	13	58	5	37	12	28	63	3	6
INS	-0.611378	13.5333	3.80976	0.0509548	0.641527	306609	225307	407754	1008249	1024063	128365	198151	334863	182464	294823	165655	935294	227426	240690	463277	152194	897677	337765	489579	105688	55652	421103	121095	56478	192797	754316	82972	739266	246240	136644	493269	329085	390535	667301	9652	326783	409418	367966	134635	627185	315337	247094	349409	575975
ATP8A1	-0.512456	4.1998	3.80355	0.051144	0.64338	154	239	320	776	369	119	248	339	145	214	209	657	141	534	509	217	563	222	327	153	148	248	150	176	231	396	108	497	508	112	175	157	353	287	108	371	656	541	293	360	271	341	324	716
PPP1R3C	-0.389586	4.30118	3.79893	0.0512853	0.643741	304	514	307	206	379	593	1530	445	296	333	574	493	494	644	1991	316	319	361	323	205	376	262	260	2109	1113	379	359	409	399	234	234	168	305	257	570	283	418	446	304	215	1661	483	317	287
RAD21	-0.139763	7.1014	3.7985	0.0512985	0.643741	3640	3461	3868	5528	4709	2959	4137	3789	3637	3498	3845	4699	3205	4916	5098	2717	5180	3331	4551	2036	2268	2349	2369	3388	3389	3475	2232	4524	4363	2412	2686	3140	3194	4203	2825	3237	3854	4097	3106	4124	3286	4071	4640	4914
OXCT1	-0.283243	4.40934	3.79849	0.051299	0.643741	576	517	650	868	869	271	367	604	465	479	427	702	369	872	615	326	1076	478	661	415	312	450	373	274	704	1105	443	1078	660	270	547	479	769	562	422	588	714	530	352	831	567	873	893	1002
KCNMB3	0.197167	1.76477	3.79288	0.0514709	0.645369	80	107	84	62	113	99	104	63	74	79	65	111	65	91	97	56	139	74	103	56	60	71	44	110	67	57	86	86	99	80	69	89	88	83	94	84	90	104	66	62	66	85	108	67
RNF2	-0.190355	4.61928	3.78882	0.0515959	0.646407	673	621	650	831	692	559	563	748	723	625	709	802	535	842	854	574	827	766	943	492	517	536	544	762	749	622	486	865	593	510	674	635	586	676	443	581	713	763	655	853	827	787	763	882
ASXL2	0.149853	5.40027	3.78211	0.0518032	0.647916	852	871	1071	1296	1251	746	989	1083	895	939	927	994	878	1252	1217	642	1536	709	1129	786	901	665	720	882	745	770	777	960	1360	875	857	892	935	1009	833	1080	1012	1154	941	894	687	1112	1077	1420
ARHGEF3	-0.243623	5.8798	3.78138	0.0518258	0.647916	1716	1497	1103	2096	1490	1028	1328	1496	953	1034	987	2354	1069	1614	1291	1292	1427	1733	1838	479	956	1125	1092	1320	2002	3935	907	2115	1819	949	1258	1214	1166	1450	1070	1744	2496	1953	1151	2604	1236	1892	2006	3422
SEC31A	-0.144455	7.82778	3.78081	0.0518434	0.647916	7608	9766	4760	6283	5726	5565	5511	4726	4186	5515	6653	7674	5311	6638	6521	4057	6997	5680	6672	3723	5358	4001	4433	5388	9809	10485	4647	6799	6161	4633	5465	5675	5323	5941	5722	5539	5493	6052	5096	6746	5232	6950	7758	6553
PPP1R1A	-0.591534	5.31394	3.77339	0.052074	0.648896	870	540	1233	3350	2876	187	388	672	508	587	240	2570	595	1533	1238	326	2078	715	1241	399	88	677	290	168	440	1210	435	1156	1258	298	523	604	883	1249	64	468	1217	1050	485	927	606	860	1274	2006
FAM162A	-0.418715	7.11031	3.77333	0.0520758	0.648896	4586	2939	5589	4516	4258	4520	6301	4126	3281	4033	5513	3880	4280	7857	9673	3225	4697	3531	4269	2211	4238	3294	3109	11179	7893	3222	3168	3489	4393	2941	2807	2845	3613	3824	6002	3517	3237	4417	3004	3225	9843	5350	3523	3836
SMIM32	0.661809	0.408381	3.76925	0.0522031	0.648896	21	5	13	27	38	1	17	38	0	15	10	17	9	9	10	7	49	9	18	11	0	13	18	1	20	11	6	33	28	5	22	15	28	16	0	24	24	14	23	14	30	6	25	75
TM4SF20	-1.48795	0.563291	3.76693	0.0522756	0.648896	378	82	2	8	1	0	50	1	0	15	0	5	0	20	6	1	0	5	0	0	40	1	10	10	39	0	1	5	7	0	0	3	15	50	47	10	9	1177	0	2	4	1	5	17
KLHL8	-0.160924	4.19085	3.76691	0.0522761	0.648896	501	555	397	800	756	398	491	487	383	509	408	645	319	594	556	295	756	387	586	290	331	376	318	441	533	651	351	611	450	430	487	413	446	479	378	491	538	433	329	572	300	480	552	647
C2orf15	-0.276567	3.15778	3.76686	0.0522778	0.648896	287	314	348	411	335	192	241	290	229	245	222	199	255	299	226	153	301	192	376	96	159	258	221	205	406	540	201	324	328	173	164	259	380	234	154	190	338	281	298	287	150	310	340	399
CD300C	0.576226	-0.877192	3.76504	0.0523345	0.648896	17	26	17	7	13	4	5	3	0	0	1	1	36	1	2	12	21	8	26	4	0	1	16	8	58	22	6	15	23	7	23	18	7	10	11	4	2	9	15	0	17	21	29	28
SLC25A34	-0.803794	2.02779	3.76329	0.0523893	0.648896	52	112	40	89	98	12	15	30	21	31	17	77	13	73	28	8	98	38	96	13	17	41	16	7	42	91	28	106	30	26	44	43	74	52	0	13	89	50	9	60	24	36	29	70
RBM19	0.18551	4.35812	3.76233	0.0524196	0.648896	855	887	322	476	505	359	383	392	281	460	385	415	313	281	309	384	539	473	528	273	369	354	347	362	721	959	507	477	685	455	625	421	507	444	403	405	444	513	407	477	242	496	476	663
ADORA2A	0.515382	0.693847	3.76134	0.0524505	0.648896	11	47	41	44	37	5	16	11	19	4	16	17	10	35	8	5	62	20	69	4	2	27	6	12	56	77	15	40	29	11	16	32	31	14	5	15	36	13	29	29	24	9	24	32
FEV	0.573546	1.73385	3.76106	0.0524593	0.648896	26	70	146	128	73	11	42	11	15	44	3	27	27	129	37	24	127	59	78	55	7	84	37	39	42	70	23	103	99	23	45	63	147	23	5	18	88	18	46	37	29	34	98	141
CEP85L	0.207651	2.53309	3.75895	0.0525257	0.648896	130	65	144	226	136	103	96	86	116	80	143	193	99	154	148	94	306	114	189	125	138	122	89	162	133	132	117	119	203	46	118	133	135	133	135	168	155	79	108	117	235	154	204	133
LYSMD3	-0.219576	5.35674	3.75792	0.0525579	0.648896	926	1142	1272	1639	1071	1057	1227	1167	948	999	918	1549	773	1416	1408	906	1836	864	1410	767	689	850	782	1217	1180	1653	920	1105	885	827	1063	1311	912	1140	1133	1296	1108	1305	1170	1499	1488	1287	1606	1499
PDZD9	-0.183944	2.28595	3.75706	0.0525849	0.648896	153	138	115	138	99	93	150	114	59	111	145	117	100	162	164	88	116	117	146	69	117	87	135	136	205	157	103	141	136	96	119	104	136	137	159	132	129	147	134	131	163	170	172	143
GNB5	-0.176075	4.82603	3.75665	0.052598	0.648896	792	834	664	988	937	454	596	599	241	479	522	531	616	1002	780	502	739	725	916	423	531	667	566	707	1191	1075	510	746	744	373	516	477	687	510	668	478	814	806	813	894	558	1038	754	1141
TVP23B	-0.348737	6.99451	3.75588	0.0526221	0.648896	3526	4222	4422	6170	4162	3273	3716	3931	2886	3549	3534	4815	2963	4732	4898	2247	7394	2889	5447	1827	2234	3316	2653	3454	4362	6183	2468	5032	4683	2699	3080	3786	4339	4535	3438	3913	3571	3945	3316	4878	6088	3765	4890	6256
MLH1	-0.257748	5.64308	3.75521	0.052643	0.648896	1337	1947	1489	1915	1627	1095	1533	1369	913	1196	1507	1992	1360	1952	1887	895	1984	1410	1945	642	943	1276	1169	1346	1807	2122	1108	1928	1632	1253	1440	1384	1521	1678	1400	1569	1573	1720	1368	1612	1367	1849	1822	2082
PDE12	-0.273176	5.97544	3.75148	0.0527609	0.649209	1395	1314	2220	2171	1992	1998	2258	1816	1807	2113	2571	2686	1770	2762	2609	1402	2291	1074	2189	1250	2000	1801	1607	2193	1047	1095	1525	1718	1573	1499	1657	2164	1199	2196	2209	1936	1370	2392	2140	2437	1626	1955	3140	2075
HCLS1	0.381379	2.11683	3.75056	0.0527898	0.649209	70	307	119	248	155	53	56	52	59	54	92	110	134	78	107	89	190	129	224	29	12	130	36	56	214	216	96	123	182	91	109	85	63	107	34	66	155	35	121	168	110	141	156	93
FMO5	-0.284973	5.0955	3.75037	0.0527957	0.649209	1122	936	1197	1198	945	954	1222	1030	784	1012	1201	1000	991	1463	1416	739	1116	844	1149	607	904	769	1033	1565	1336	877	882	818	1052	728	887	869	928	1138	1019	1031	1099	1317	1142	882	1356	1557	1005	930
FAM241A	0.211339	2.83471	3.7402	0.0531179	0.65232	207	142	115	242	247	99	199	160	211	210	201	219	151	247	190	163	236	128	219	171	234	141	157	154	119	120	104	156	204	156	133	245	120	186	132	139	152	142	231	163	158	127	172	152
LNPK	-0.2096	5.43352	3.7383	0.0531784	0.65232	1194	922	1576	1387	1428	722	1437	955	1008	854	721	1193	807	1216	1631	760	1918	1525	1486	820	769	841	962	1425	1291	1671	829	1455	1609	844	1374	903	1024	1027	767	1438	1472	1296	1240	1144	1446	1523	1727	1519
LILRA5	0.752891	-1.49415	3.73677	0.0532272	0.65232	0	2	13	9	0	0	6	6	2	0	3	0	0	14	5	5	3	12	1	1	0	1	2	2	28	18	5	6	34	2	2	9	1	2	4	2	16	2	10	1	3	13	15	7
ABL2	0.147471	4.97364	3.73669	0.0532298	0.65232	667	827	585	1202	986	695	633	738	620	707	751	721	773	636	798	649	1177	518	1107	679	533	655	595	483	486	718	805	897	944	954	848	833	738	1023	589	665	769	782	901	892	593	680	825	1178
ADAMTS14	1.05244	-0.697227	3.73544	0.0532696	0.65232	0	3	6	8	1	0	3	1	0	3	0	0	0	1	10	0	17	35	11	5	0	25	0	1	0	1	4	6	8	0	9	0	9	0	0	0	0	0	3	1	4	1	1	8
SYNGR1	-0.348414	3.55615	3.73434	0.0533046	0.65232	387	296	285	198	96	162	429	186	116	95	197	179	218	534	554	192	160	351	308	219	449	123	375	353	536	150	143	225	299	141	187	198	217	236	329	205	188	453	211	194	140	372	230	232
MCTP1	0.398715	1.3475	3.72761	0.05352	0.654101	47	86	62	89	54	60	37	61	37	66	47	46	84	50	146	39	116	77	116	39	15	110	21	43	95	42	118	63	33	53	78	120	55	86	39	43	56	24	93	122	87	54	82	58
TMEM52	-0.5194	0.701245	3.72658	0.053553	0.654101	33	26	9	2	33	76	28	43	92	81	98	47	83	89	61	75	23	97	36	39	28	23	30	85	33	6	28	22	14	12	64	19	34	13	45	33	30	13	57	20	27	36	38	2
STARD8	0.640025	-0.537319	3.72579	0.0535784	0.654101	3	6	7	7	11	2	18	17	13	10	4	3	4	4	14	8	13	8	7	4	7	2	9	3	18	1	6	17	26	6	3	8	3	5	15	0	9	3	2	4	0	6	10	1
ATXN7L1	0.196413	2.82413	3.72262	0.0536801	0.654821	183	163	215	280	326	122	198	213	148	161	135	255	164	136	198	165	253	150	287	97	79	143	96	140	173	158	169	242	299	111	154	227	222	154	105	113	247	133	149	176	129	179	138	216
RRAGD	-0.234857	5.67916	3.72095	0.0537338	0.654953	1564	1049	1522	2355	1510	532	1095	1084	777	902	751	1335	851	1605	1495	652	2420	2120	1893	863	799	1354	745	835	1124	1381	621	2254	2258	777	1088	1297	2318	1769	745	1149	2047	816	1066	1039	879	1028	1493	2138
PSG9	-0.662378	2.07938	3.71828	0.0538196	0.655477	131	127	7	26	41	115	185	98	106	108	131	27	43	153	149	175	21	156	12	41	673	43	216	9	55	16	36	24	276	19	203	29	285	136	487	175	115	458	129	29	100	194	17	95
ZNF395	-0.237137	6.44967	3.70931	0.0541097	0.658486	2475	2074	1741	2328	2808	1517	2935	1615	1512	1619	1868	2528	1479	2701	2632	1344	2398	1783	1950	1340	1497	1364	1500	3155	4024	2111	1346	1312	1692	1610	1775	2167	1888	1732	1980	1489	1458	2096	1205	1924	3735	1678	2146	2225
FYB1	0.471986	0.909581	3.70712	0.0541806	0.658825	13	36	59	66	49	44	24	95	9	72	31	24	53	55	133	63	53	93	51	29	2	14	32	9	71	50	24	54	104	68	65	19	75	38	38	17	48	80	28	30	34	81	63	44
NUDT10	0.441452	-0.904717	3.70445	0.0542674	0.65908	7	15	17	18	23	4	5	10	0	3	9	3	9	2	9	3	26	23	18	18	6	6	6	6	3	17	4	14	9	2	14	18	1	9	6	14	28	5	17	15	11	15	9	34
MYLK3	0.731509	-1.78492	3.70383	0.0542878	0.65908	2	5	0	20	1	0	4	20	0	8	0	12	0	1	19	8	13	3	5	0	0	2	0	0	3	8	10	1	1	0	1	5	1	10	0	1	0	4	0	0	0	0	5	13
IRS1	0.304873	3.9508	3.70057	0.054394	0.659846	247	203	215	203	237	246	448	357	310	340	409	236	291	300	485	244	259	224	475	195	364	141	248	432	162	136	223	144	306	321	335	566	330	282	484	301	272	400	391	274	324	338	351	186
ELL2	0.228486	7.98082	3.69889	0.0544486	0.659984	5171	5273	7053	9384	9486	8235	6774	5841	6881	7935	6561	11211	6144	7744	8110	4831	11717	5085	11622	5075	4102	5548	3426	6308	5272	5651	4456	5121	7270	6155	5159	8036	5997	4465	4396	7094	5690	5361	6714	7994	9920	5875	9385	7772
THPO	-0.845564	-1.72672	3.69458	0.0545894	0.661167	0	17	32	10	1	2	11	0	6	7	19	0	19	1	14	1	4	0	0	6	0	6	6	4	46	1	2	1	9	2	0	4	0	6	7	3	6	12	1	24	0	8	8	0
IRAG1	0.578831	-0.0589083	3.69217	0.0546684	0.661402	5	21	27	37	25	9	59	3	1	6	14	20	30	8	13	11	47	47	14	9	0	16	7	13	5	28	16	23	51	24	22	22	25	16	0	1	40	2	26	18	19	40	21	25
UFSP2	-0.320447	5.62156	3.69026	0.054731	0.661402	1435	1214	1233	1496	1567	1439	2404	1202	988	1235	1768	1767	1330	1352	2490	1131	1505	1365	1681	785	1181	1302	1106	2178	2337	1988	1469	1479	1240	1022	1165	1200	1281	1368	1476	1268	1176	1645	1392	1563	4061	1919	1635	1537
COL16A1	0.802212	2.64021	3.69003	0.0547385	0.661402	51	56	101	33	22	22	42	34	22	14	20	22	13	17	60	14	94	87	33	25	32	50	40	46	36	13	30	45	133	48	60	21	45	72	11	12	40	16	22	39	24	26	17	61
SLC25A18	-0.235812	2.81239	3.68768	0.0548158	0.661813	329	239	193	302	216	117	218	174	120	188	188	243	161	251	262	126	364	207	260	120	233	234	148	178	187	249	86	208	241	130	171	189	218	225	179	190	229	217	160	200	218	211	205	264
PTPRE	0.319175	3.26919	3.68524	0.0548962	0.662008	150	337	285	580	399	119	189	206	155	79	135	196	321	170	180	201	444	374	348	143	21	216	61	148	276	360	337	325	292	168	239	320	153	285	76	168	169	333	309	462	244	180	304	325
NCOA1	0.129643	6.05185	3.68456	0.0549185	0.662008	1718	1340	1804	2167	2113	1156	1865	1514	1080	1093	1308	1739	1294	2246	2134	1203	2457	1400	1948	1081	1032	1228	994	1639	1798	2021	1315	1737	2383	1054	1450	1531	1777	1509	1796	1753	1790	1972	1492	2010	1221	2335	2109	2384
HLTF	-0.265564	5.74731	3.68296	0.0549713	0.662123	983	1344	1626	2715	2036	1040	1259	1353	1078	889	1076	2232	1122	1894	1792	863	2579	1416	2293	846	533	1057	900	900	1583	2284	995	2779	1717	895	1453	1526	1683	1743	823	1566	1917	1436	1218	1972	1841	1716	2362	2620
ANXA9	-0.362522	3.67823	3.68011	0.0550651	0.662279	502	371	598	230	180	247	659	329	118	130	148	182	293	492	465	217	191	299	203	165	397	90	369	1098	667	164	90	214	422	181	142	83	193	194	579	194	290	565	224	109	214	773	194	398
DMAC1	-0.225368	4.63115	3.67723	0.0551604	0.662279	760	563	949	871	923	776	1083	854	631	864	1089	748	860	981	1458	680	1184	685	754	469	731	723	475	642	552	533	405	716	690	371	660	527	666	612	487	463	665	607	723	604	915	820	705	660
FAM174A	-0.260098	3.31038	3.67692	0.0551706	0.662279	150	79	291	357	272	115	183	212	120	236	143	256	187	317	365	149	374	227	260	175	189	215	211	222	107	141	151	265	315	153	193	179	253	252	171	221	282	275	165	302	275	293	277	305
CYP27B1	0.419966	1.99602	3.67623	0.0551934	0.662279	32	83	58	22	90	206	182	69	29	107	113	120	115	80	225	86	43	28	107	102	159	107	128	195	123	33	138	54	67	74	76	75	50	28	150	36	29	64	95	63	107	60	66	12
METTL27	-0.567111	0.6175	3.67582	0.0552072	0.662279	123	110	23	60	16	10	29	20	49	30	57	11	56	19	19	49	9	56	86	57	97	40	37	1	17	8	9	32	4	13	7	40	50	6	43	10	39	60	45	7	5	44	11	12
CNN1	-0.517484	2.15537	3.67471	0.055244	0.662279	204	126	147	24	48	224	168	122	120	188	395	143	64	39	52	201	54	118	100	29	419	60	642	37	98	52	121	77	121	77	48	24	74	308	113	184	59	156	54	81	33	139	121	119
PSG2	-0.833911	0.296463	3.67171	0.0553433	0.662949	95	52	33	13	4	46	37	79	3	2	22	0	0	34	22	49	7	70	37	9	169	28	110	53	26	0	7	0	40	65	64	4	58	59	143	32	15	54	16	5	22	37	0	2
APPBP2	-0.153649	5.3814	3.66601	0.055533	0.664701	770	782	1129	1714	1168	759	1347	1134	793	1046	1082	1413	1110	1699	2028	713	1464	661	1257	696	824	854	661	1114	780	868	671	1425	1248	657	706	1137	919	1137	1049	1160	1200	1097	1073	1307	1240	1227	1679	1512
TLE3	0.244442	3.92751	3.66303	0.0556322	0.665368	651	600	302	324	307	223	199	245	244	207	259	346	295	212	201	173	317	556	592	273	226	316	204	274	437	587	279	282	363	358	466	395	363	307	183	356	310	318	487	441	206	327	484	459
SNAPC1	-0.360711	4.36127	3.65912	0.055763	0.666412	759	825	773	1011	805	334	688	517	396	685	491	503	444	688	406	515	905	629	1129	254	363	404	344	846	931	464	350	355	922	681	618	1130	581	566	791	937	632	449	764	758	1223	565	885	774
TSPYL5	-0.259483	4.87884	3.65733	0.0558229	0.666607	518	547	803	1456	937	546	436	804	628	899	436	1539	477	715	820	443	1094	388	1045	572	325	509	390	375	406	1162	457	1388	896	408	631	520	907	1395	235	740	797	1164	690	1231	493	1015	1101	1004
GRAP	0.613244	-1.16813	3.65593	0.0558701	0.666649	1	4	6	12	8	4	1	1	1	1	2	11	5	3	9	3	10	13	13	3	0	14	0	4	8	4	17	6	8	6	7	5	8	9	1	2	1	0	3	15	5	5	10	3
F2R	0.365478	3.66931	3.65445	0.0559198	0.666722	222	335	398	443	333	179	236	141	228	211	268	208	151	190	386	235	486	614	353	231	76	355	129	179	151	375	148	563	644	383	384	254	263	222	97	177	288	91	409	284	300	296	562	263
NFKBIA	0.260165	6.77995	3.64843	0.056122	0.668168	2670	2578	2410	3770	3289	2401	2988	2772	1780	2011	3270	2449	2936	2576	3272	2047	5486	2191	5450	1508	3542	1743	2030	2592	3800	1219	2222	567	1935	2506	1714	3561	1455	2943	3178	2328	1597	2870	2562	2037	2599	1925	2792	1610
BGLAP	-0.324853	-0.842624	3.64824	0.0561283	0.668168	9	25	14	20	9	6	8	10	9	10	9	20	4	12	24	5	42	13	14	7	22	11	8	5	12	25	6	18	9	8	13	7	15	12	6	11	17	10	17	20	14	21	19	17
KIF2C	-0.531361	-0.204979	3.6464	0.0561904	0.668386	53	36	45	31	8	12	28	8	19	5	18	2	7	7	42	11	10	91	31	13	16	3	23	13	32	38	12	43	64	1	5	21	44	34	34	4	57	11	1	16	12	52	19	17
COPB2	-0.220853	8.22291	3.63824	0.0564667	0.671151	9168	10285	7772	9342	8132	7145	9515	8139	5706	6686	9150	10840	8526	9132	10001	5541	10064	6062	10373	5338	6799	6774	7664	9118	11911	12020	7411	9170	9277	7594	7251	7909	8554	8895	10183	8954	8235	10251	8603	10452	10376	10752	11913	9961
DUOX2	0.63668	8.55979	3.63447	0.0565948	0.671772	6217	4106	11661	852	2118	2599	15287	2248	983	750	4890	1408	2621	14809	16502	3357	3461	2441	14359	2112	8565	3149	2824	17880	14800	896	4044	418	8541	2603	1515	4093	3273	4216	13147	2108	2070	9938	3833	979	2396	5243	3130	1686
RNASE4	-0.32326	5.77494	3.63328	0.056635	0.671772	2353	2476	3544	685	1188	1298	2220	1398	1655	1352	2233	1064	1275	4072	3400	1081	866	1259	1376	821	1340	1228	1600	3093	3101	1182	752	1611	2518	747	744	522	1873	914	2032	1038	1122	1581	1087	891	2355	1793	1103	1818
RALYL	-0.546626	2.80612	3.63138	0.0566999	0.671772	131	121	322	448	427	63	201	213	105	72	74	533	113	111	210	61	402	171	144	102	48	129	46	68	186	486	59	411	241	68	204	232	260	386	12	194	429	230	106	486	257	245	246	595
ZNF878	0.479105	0.497903	3.62981	0.0567532	0.671772	19	25	4	53	84	72	43	47	36	48	47	19	60	3	36	30	86	15	59	11	12	46	3	58	39	40	44	0	4	32	32	50	31	24	27	44	0	22	41	74	29	24	69	24
MAL2	-0.294973	6.64111	3.62907	0.0567785	0.671772	2877	1844	1576	1432	1508	2425	3595	2875	2029	3107	4146	2284	1917	2380	3532	2046	1769	1509	2149	2338	4100	1284	2102	2509	1174	684	2021	1069	2233	1948	1547	1754	1273	3037	4111	2780	1392	3760	2225	1991	2949	2664	2283	1483
IL18BP	0.425797	5.22047	3.62895	0.0567825	0.671772	1443	3982	1322	1694	3068	724	678	591	574	293	557	1099	959	886	636	550	3239	551	2127	300	499	1212	510	543	2255	2374	818	322	749	600	495	851	1091	402	558	424	758	508	545	722	719	490	722	1204
CRACD	-0.513882	2.17423	3.6267	0.0568596	0.672165	71	25	99	161	132	48	37	60	49	87	26	173	36	45	109	38	237	163	109	72	17	105	32	71	54	94	22	206	96	49	115	113	101	224	14	145	171	132	84	152	130	107	41	225
GUCD1	0.25812	5.36601	3.62408	0.0569492	0.672704	2031	1433	606	587	667	803	952	649	481	549	731	767	693	807	883	640	698	820	1026	640	804	632	851	801	1295	773	782	609	988	765	708	827	739	911	1009	666	640	1023	856	633	539	791	819	737
MPV17L	-0.280937	4.20034	3.62278	0.0569935	0.672708	612	877	445	387	661	547	609	818	286	289	483	424	561	792	863	434	343	516	592	691	336	278	438	769	1525	603	332	538	439	499	426	349	419	328	602	397	352	618	385	405	267	900	286	444
CHID1	-0.172131	5.28285	3.61895	0.0571248	0.673738	1383	1659	939	1663	1041	605	789	774	704	636	948	1101	1039	1190	967	677	1326	1145	1205	737	533	824	797	616	1610	2000	708	1459	1469	635	944	738	1299	1190	773	864	982	996	824	926	596	857	1028	1161
TAF11	0.173038	4.43764	3.60848	0.0574857	0.67696	899	754	397	609	757	411	550	552	335	435	483	512	403	508	461	502	902	607	747	304	312	416	341	302	750	803	460	539	703	573	475	573	712	569	497	404	606	565	419	422	408	496	416	612
USP11	-0.318619	5.96569	3.60846	0.0574865	0.67696	2791	3820	1206	2320	2111	635	1016	966	817	694	901	1691	842	1269	1070	733	2054	1578	2120	715	442	1409	870	824	3764	7256	803	3337	1994	740	1435	1307	2035	1824	547	1294	2092	1398	1115	2269	1011	1390	1935	2751
ZNF227	-0.192684	3.70972	3.60436	0.0576284	0.677773	404	349	601	599	358	447	294	374	242	380	335	501	209	375	518	261	436	258	524	178	259	279	254	311	310	498	256	424	325	284	313	337	346	437	309	302	430	400	259	579	291	317	532	522
CNPY4	-0.291395	2.40873	3.6039	0.0576442	0.677773	184	204	168	171	130	46	90	99	76	65	91	158	101	225	101	106	211	170	116	64	82	97	67	102	167	345	79	214	211	72	162	65	159	130	63	90	205	97	140	161	86	110	120	236
CNTNAP5	0.564446	2.16353	3.60257	0.0576904	0.677796	27	161	114	205	163	9	31	50	79	39	15	191	69	190	77	21	126	29	146	20	13	61	69	4	105	245	54	162	180	81	50	41	172	67	4	123	207	88	79	133	69	101	142	351
ZNF439	-0.198124	3.18301	3.59999	0.05778	0.678327	169	231	319	424	235	229	295	310	150	174	298	194	231	221	330	167	357	317	364	112	158	229	116	233	187	263	217	411	271	219	188	198	283	255	223	241	309	202	233	335	400	191	279	273
ZFP92	0.43776	0.974799	3.59601	0.0579185	0.679415	35	69	45	76	33	9	32	9	10	45	31	26	31	24	36	27	90	44	7	13	13	29	22	12	30	40	21	59	64	17	37	39	49	28	3	10	43	22	46	81	28	42	44	48
MINAR1	-0.313336	2.09997	3.59401	0.0579881	0.679415	71	103	58	241	181	81	77	204	110	106	87	60	125	137	192	56	136	179	55	17	138	51	98	187	73	42	57	218	98	85	93	86	104	64	68	175	35	155	81	108	102	99	81	170
FKBP10	0.902439	2.43648	3.5935	0.0580059	0.679415	21	7	49	26	26	10	22	7	5	8	10	27	9	20	14	10	68	48	13	14	7	32	8	11	26	9	9	34	30	29	25	27	25	20	3	15	10	20	21	28	11	43	22	21
ABI3	0.537467	0.172774	3.59219	0.0580518	0.679433	1	12	50	52	16	10	27	5	22	21	7	18	18	24	51	26	48	47	42	18	0	22	11	6	8	19	20	24	55	17	42	31	25	28	4	6	36	11	17	48	10	40	19	14
MEGF11	-0.427437	4.84941	3.58964	0.0581409	0.679955	489	498	970	1572	1181	731	807	982	992	833	903	1794	558	1102	1406	542	1144	745	1331	654	587	679	703	816	492	792	435	1646	940	890	752	1216	924	1177	746	1011	891	1120	863	1199	717	1094	1517	964
STXBP6	0.198837	4.20405	3.58732	0.0582221	0.680385	374	385	395	414	489	443	433	625	304	433	429	367	412	422	665	415	429	437	383	360	449	299	239	413	347	330	530	364	432	288	285	367	298	260	308	339	294	342	591	299	517	475	442	497
PLD4	-0.331213	0.293735	3.57543	0.0586401	0.683448	32	44	22	39	36	19	84	29	57	34	27	41	36	27	53	28	30	57	45	41	31	34	18	30	22	6	14	11	52	17	33	45	27	51	58	45	24	53	29	43	23	41	27	31
UQCRC2	-0.20236	7.06793	3.57532	0.0586442	0.683448	4813	4275	3952	3626	3205	2939	4708	3674	2266	3591	4583	4254	3694	5182	5074	2742	3805	3772	4101	2166	3890	2968	3388	4136	5098	4150	3113	3995	4632	2970	3493	3113	3859	3990	4562	3403	3606	4740	3639	4245	4758	4986	4328	4275
ZNF835	-0.341342	1.23679	3.57497	0.0586564	0.683448	38	60	107	88	95	21	73	73	101	72	46	64	50	74	86	22	104	65	61	30	19	69	31	38	43	114	15	80	76	42	46	47	118	57	69	77	103	48	63	76	36	56	111	137
AMBN	0.782739	1.06838	3.57479	0.0586629	0.683448	10	111	102	44	70	7	33	23	7	28	15	24	23	74	8	13	85	17	149	32	7	134	4	29	72	234	30	34	35	33	45	129	158	6	10	20	47	14	86	31	99	27	120	64
IRAK1BP1	0.189238	2.34574	3.56844	0.0588878	0.685545	95	95	131	220	119	74	166	185	57	137	95	72	112	152	175	122	156	88	88	65	114	103	96	106	131	105	120	118	100	110	132	133	136	137	86	136	146	105	125	111	89	120	102	162
CLDN16	-0.717743	-0.0892875	3.56636	0.0589616	0.685882	15	2	14	5	0	33	20	63	0	35	7	0	13	12	33	3	8	56	5	11	44	24	28	28	34	4	16	1	14	15	21	4	17	16	35	26	10	57	38	5	10	69	8	6
CFAP69	0.243006	1.8777	3.5612	0.0591448	0.687491	47	21	123	125	97	83	123	130	22	43	53	38	51	67	99	65	194	91	93	53	112	58	119	106	82	37	96	84	92	76	101	82	82	114	108	54	99	155	41	91	99	95	58	115
CHST7	-0.256058	0.649024	3.55722	0.0592868	0.688618	30	57	22	47	44	24	54	52	15	71	55	37	17	48	45	32	58	51	48	26	28	72	22	34	13	52	19	51	60	27	33	51	33	55	18	57	20	38	41	41	33	69	34	30
NTNG2	-1.11495	0.357521	3.5521	0.0594703	0.689885	3	7	2	11	4	2	8	12	0	4	0	25	0	17	4	4	10	3	23	1	0	2	0	2	0	0	0	5	10	4	4	8	4	14	1	7	4	11	8	5	12	3	5	3
ACSL4	0.176768	6.26894	3.55166	0.0594861	0.689885	1803	1942	1724	1510	1290	1889	2552	2064	1618	1747	2042	1565	2019	2142	2716	1726	2050	2262	2480	1264	1718	1573	2051	2508	2448	1318	2229	1220	2074	1585	1672	2023	1330	1897	2339	1889	1133	2097	2667	1988	2396	1983	2053	1888
EDNRA	0.449736	2.91355	3.54414	0.0597563	0.692493	71	179	226	343	184	89	142	123	152	101	133	211	145	111	199	132	431	304	196	144	2	283	19	160	89	229	96	235	282	120	227	226	194	157	28	75	165	36	258	174	253	173	320	232
LDAH	-0.216554	4.56303	3.53945	0.0599253	0.693083	538	710	715	965	612	431	957	729	335	612	712	795	643	935	721	466	913	481	1025	456	639	394	615	853	720	1131	480	676	701	530	388	647	799	554	747	763	610	1001	526	734	743	888	759	1020
CEBPZOS	-0.12864	5.10634	3.53889	0.0599454	0.693083	919	842	849	1263	1100	697	1016	796	649	739	836	995	647	906	980	585	1400	788	1131	582	647	746	705	722	1044	1442	701	975	1083	687	799	991	1065	996	706	849	938	859	797	887	1177	1043	1029	1148
KCNA2	0.630487	0.157554	3.53789	0.0599819	0.693083	15	18	22	19	20	6	17	14	30	0	7	23	5	7	29	0	65	43	28	0	1	8	1	9	35	17	0	28	13	3	36	32	12	27	0	9	42	24	16	10	1	12	20	43
FAM181B	-0.825979	-0.476985	3.53649	0.0600325	0.693083	2	7	2	3	4	0	7	9	1	3	6	6	8	7	31	3	13	0	3	2	2	7	2	1	3	10	2	27	23	10	12	2	3	3	0	3	27	15	4	17	11	21	16	13
YIPF6	-0.220701	6.69979	3.53534	0.0600741	0.693083	2473	2743	3163	4255	3693	1936	2518	2581	2127	2329	2545	4297	2092	3868	3509	1624	4952	2417	3635	1737	1780	2529	2282	2308	3079	4051	2367	4382	3849	2169	2666	2806	3313	3538	2656	2922	3398	3186	2525	3694	3713	3342	4148	4273
EPHX2	-0.40523	3.91468	3.5352	0.060079	0.693083	162	150	395	819	639	120	194	258	223	213	254	243	106	264	378	106	290	306	589	198	111	337	176	220	298	666	194	544	397	78	184	248	387	406	86	229	592	226	157	689	320	548	284	688
NMNAT1	-0.185478	3.89956	3.53095	0.0602331	0.694196	532	343	392	536	428	356	441	336	282	272	422	397	373	439	411	270	653	288	419	244	225	377	277	424	482	494	410	532	604	345	280	403	480	418	493	396	489	445	339	382	469	591	489	576
KMT2C	0.147439	6.88251	3.52975	0.060277	0.694196	1946	2222	2850	3939	3579	2650	3513	3568	2798	3017	2839	3028	2311	3893	3928	2252	4671	3259	3852	2237	2522	1933	2055	3009	2321	1925	2491	3176	3784	2214	2439	2709	2761	3602	2684	2925	3446	2968	2661	3187	2146	3113	3071	4598
ERO1B	-0.424195	8.474	3.52879	0.0603116	0.694196	6298	4648	8667	23277	17427	2561	4401	7358	4893	6122	2721	21723	4868	14785	9647	2337	16738	6681	11720	4139	1888	7106	3386	2408	5831	14408	4601	17697	11644	5417	6864	8047	10571	16012	1162	8165	11844	9959	5601	14257	6794	8872	10606	19672
TNFRSF19	-0.187205	5.26776	3.52399	0.0604867	0.694921	1059	1301	1113	1523	1411	718	937	770	600	878	722	1460	665	945	1139	899	1080	1298	1252	853	631	694	822	509	1124	1903	894	1067	1152	929	698	681	1019	1480	521	1220	1275	1104	1122	1321	1250	970	1552	1543
CAMSAP2	0.149462	5.16259	3.52225	0.0605503	0.694921	738	767	789	1160	974	686	860	729	774	768	678	874	569	726	961	648	1163	721	1048	681	730	553	685	762	593	539	562	732	970	623	698	821	595	1007	704	1054	991	931	1004	853	865	1075	1035	1123
EVI2A	0.45074	1.06585	3.52099	0.0605964	0.694921	7	40	69	111	72	70	33	83	9	25	31	37	35	57	70	67	100	56	83	51	21	62	74	25	82	35	62	107	99	49	70	70	78	31	27	20	70	34	57	45	43	43	41	56
ZC3H12C	0.200857	4.55012	3.51914	0.0606638	0.694921	358	510	509	971	571	297	604	624	358	505	420	609	262	589	495	390	979	394	1113	472	474	265	365	438	588	559	323	386	623	338	398	602	370	597	485	491	388	534	525	633	458	439	495	613
AFG1L	-0.191792	2.03614	3.51872	0.0606793	0.694921	132	84	118	173	120	67	88	118	51	93	103	123	90	136	105	81	151	122	137	75	76	96	87	143	97	143	92	107	139	61	77	82	168	89	65	58	144	111	154	104	134	127	112	157
TSPAN18	0.299713	0.586075	3.51852	0.0606865	0.694921	23	28	41	47	48	14	53	22	14	8	43	22	42	63	51	24	40	17	28	31	27	36	42	31	27	19	16	20	33	14	46	32	29	40	32	29	27	39	25	49	24	25	36	21
CDC25C	-0.684752	-1.74565	3.51836	0.0606926	0.694921	14	1	23	3	3	1	0	0	2	2	4	1	1	5	27	5	2	24	3	1	1	13	1	1	2	16	9	13	38	0	1	4	14	10	0	2	8	9	0	1	0	11	6	17
PEX12	-0.195264	3.11687	3.51641	0.0607638	0.695216	276	234	183	297	232	146	160	134	125	224	229	151	249	269	143	183	549	174	318	96	111	213	174	231	186	402	197	293	336	176	212	186	236	322	222	155	239	200	200	390	331	222	358	375
PPOX	-0.221191	3.05685	3.51433	0.0608403	0.695571	361	331	179	326	200	99	176	240	101	112	253	195	177	208	188	120	282	285	231	154	150	218	199	156	453	553	149	247	222	98	180	156	182	201	113	163	139	183	128	203	109	237	141	206
SETD2	0.126277	5.8648	3.51145	0.0609461	0.696261	1037	1235	1454	1619	1274	954	1399	1339	1221	932	1096	1368	1170	1489	1700	815	1921	1223	1774	789	976	904	841	1270	1371	1253	1321	1509	1735	1094	1299	1351	1312	1548	1311	1361	1526	1636	1607	1468	1086	1732	1483	1894
GPC6	0.47284	4.05168	3.50761	0.0610874	0.696986	201	585	597	729	453	108	277	253	131	105	141	338	277	474	525	78	923	407	872	392	58	505	65	244	426	1056	175	565	517	264	325	615	634	138	18	212	536	67	417	455	440	441	1205	724
PARVB	-0.491701	4.20332	3.50725	0.0611008	0.696986	378	381	438	1320	929	148	146	324	200	307	179	953	159	693	346	165	616	389	330	195	85	289	181	76	208	824	145	1305	671	145	224	177	534	646	29	346	576	425	149	522	183	327	447	832
FILIP1	0.439488	1.47827	3.50325	0.0612486	0.698152	25	93	110	155	143	50	30	42	101	41	74	50	69	77	41	69	164	104	115	90	15	86	6	13	57	100	60	122	62	60	115	58	47	94	14	29	84	25	83	91	52	100	52	115
CREBBP	0.220629	5.58511	3.49928	0.0613956	0.698362	688	732	955	1174	1126	905	1041	844	926	928	870	1194	755	1071	1204	682	1177	893	1636	873	948	712	888	792	773	676	820	988	1132	917	730	1149	876	1169	936	950	1016	1040	1090	1046	601	1100	1000	1284
PELI1	0.185103	4.52	3.49888	0.0614104	0.698362	471	397	389	611	552	554	838	612	431	456	734	647	545	618	912	557	664	310	661	389	703	313	478	494	508	171	570	445	580	431	498	653	247	564	616	373	470	625	568	506	535	402	393	250
HTRA3	0.612936	2.48376	3.49788	0.0614473	0.698362	21	73	120	125	91	24	71	74	20	38	62	90	78	127	141	81	124	316	167	65	3	180	56	34	41	85	81	188	170	78	97	80	121	57	1	33	123	45	88	100	97	107	156	74
ZNF800	0.121079	4.7901	3.49684	0.0614861	0.698362	514	494	621	751	645	590	798	735	829	588	668	708	584	751	786	489	958	517	926	516	516	463	428	744	442	396	534	627	877	515	555	723	548	714	594	763	644	585	860	752	714	699	745	813
CNTN4	-0.402152	4.10361	3.49659	0.0614953	0.698362	266	497	430	815	461	100	216	280	218	276	146	465	238	594	428	139	313	319	498	249	115	236	316	206	323	1428	146	1545	934	190	322	340	678	438	123	499	895	265	287	388	288	488	712	800
AQP4	-0.522243	0.694239	3.49423	0.0615831	0.698597	20	47	47	45	28	16	37	5	42	15	14	34	13	79	65	2	53	40	34	38	7	36	0	26	36	18	16	47	63	10	2	21	40	27	1	46	44	36	63	47	33	52	50	21
PTGES	0.510411	2.52381	3.49113	0.0616983	0.698597	181	537	202	152	134	23	136	33	8	8	81	13	94	159	91	69	751	241	184	25	14	183	31	103	497	263	35	20	87	74	123	198	87	267	64	27	91	92	97	24	44	37	42	83
BCKDHB	-0.214529	3.01784	3.49109	0.0616998	0.698597	156	110	209	235	222	107	215	226	181	190	200	194	144	257	312	95	257	111	150	150	128	190	216	267	172	156	129	334	226	139	157	138	197	167	135	176	172	153	123	228	167	267	279	246
C12orf60	-0.280858	1.75227	3.49105	0.0617013	0.698597	83	58	124	164	95	83	113	108	92	110	129	93	110	105	128	118	119	40	121	44	40	96	53	91	56	96	30	140	101	48	58	76	80	141	48	99	104	79	70	109	174	109	148	173
ABHD16A	-0.213246	5.20843	3.4886	0.0617929	0.698597	1701	2061	946	1615	1375	459	794	744	384	480	754	1173	666	995	778	513	1543	690	1036	428	597	795	557	658	1626	2436	651	1189	1029	499	774	796	1026	1084	708	756	938	984	860	1185	668	988	1003	1217
PGAP4	-0.157224	4.83056	3.48816	0.0618091	0.698597	777	821	803	1146	991	492	672	572	466	559	545	1337	652	876	954	518	1239	646	918	369	423	493	428	624	917	985	489	1016	696	364	670	605	737	773	495	624	874	901	620	861	517	841	772	1110
EIF3J	-0.164195	5.62161	3.48745	0.0618357	0.698597	1103	839	806	1110	1253	1421	1502	1410	1654	1624	1956	1534	1265	1285	1593	1310	1442	1289	2133	1041	1712	1051	1087	1524	784	925	1103	779	1131	1086	1110	1538	1028	1460	1359	1174	821	1221	1431	1756	1251	1683	1402	1124
PRKAG2	-0.170239	4.72174	3.48607	0.0618874	0.698665	663	624	545	844	600	398	646	755	642	710	496	711	354	720	578	367	744	895	1114	570	533	686	506	547	522	756	480	1309	1067	591	677	835	1126	960	337	597	604	587	591	830	576	763	874	895
TSPAN8	-0.502547	7.46444	3.4845	0.0619462	0.698813	10025	4908	6652	1085	1165	3080	12396	6830	1441	3043	3913	1280	4757	13031	7281	1738	1349	3866	4251	3081	10380	2627	5510	18488	8500	677	3310	880	6147	1292	1720	2111	2891	5694	12878	4386	4348	20410	2183	1260	5026	14726	3792	3423
CCT4	-0.194988	7.00671	3.48104	0.0620759	0.69976	4008	3266	2644	3881	3536	3750	3884	3240	3247	4246	5137	4448	3192	3178	3130	3396	3268	3561	5373	2842	3940	3460	3449	3464	3411	3451	3587	3753	2936	2000	3239	3994	3277	3622	2467	3388	2360	4392	3862	4458	4119	4363	4731	3833
MDN1	0.167475	5.22381	3.47428	0.0623299	0.702106	484	753	777	1348	1228	764	877	971	744	1016	939	757	896	746	700	545	1374	932	1407	795	705	650	833	773	581	716	832	951	936	960	959	951	810	953	645	1025	840	727	824	1208	473	791	1099	1164
ING2	-0.182994	3.10054	3.47143	0.0624373	0.702798	147	212	160	295	372	139	162	183	168	174	183	243	133	350	426	169	428	230	281	144	168	134	121	185	237	194	145	319	218	128	195	178	269	226	210	161	242	236	164	238	253	281	177	342
SYNPR	-0.837292	-1.55293	3.46929	0.0625181	0.703191	10	14	17	5	0	0	5	0	0	0	0	0	0	21	2	0	7	8	14	0	14	15	0	15	12	13	0	10	43	4	0	0	2	19	3	7	2	11	0	1	2	1	14	13
DOK5	-0.49703	1.90674	3.4628	0.0627638	0.705196	207	149	184	53	41	49	386	87	65	32	82	30	48	165	189	36	92	109	168	57	128	62	90	448	200	6	27	22	90	31	63	123	145	176	174	141	68	327	52	51	125	99	198	36
ENPP4	-0.224853	6.16968	3.46035	0.0628572	0.705196	2166	2579	2244	3041	2270	1416	1988	2272	1301	1789	1733	2767	1839	2377	2520	1481	3480	1592	3381	1079	1390	1305	1445	2079	2558	2966	1433	2136	1703	1474	1471	2148	1630	2274	1512	2002	2322	2580	1972	2558	2877	2130	2931	2850
JMJD6	-0.170174	4.3645	3.45758	0.0629625	0.705196	896	863	323	549	478	415	638	477	420	418	559	590	463	670	399	466	759	421	649	240	307	397	383	475	771	829	530	458	523	605	536	540	359	675	491	503	398	537	378	602	432	405	556	487
BGN	0.54802	5.14138	3.45736	0.0629707	0.705196	820	1765	987	719	418	104	386	178	188	146	305	463	315	667	617	231	1211	1400	693	316	32	744	262	385	1526	2294	507	812	1321	363	859	248	637	450	46	185	803	169	665	703	398	557	569	633
MCOLN3	-0.284738	4.30459	3.45665	0.0629978	0.705196	377	429	492	1190	872	268	348	439	357	365	223	350	408	600	510	351	1034	676	666	418	204	474	447	213	555	1048	356	936	785	187	580	536	677	625	201	518	687	322	540	604	385	438	526	1196
ACOX2	-0.449439	1.03182	3.45576	0.0630317	0.705196	39	12	114	69	67	50	210	41	8	14	39	33	43	198	161	14	117	37	39	38	50	58	1	133	186	53	43	45	132	14	5	32	33	35	75	13	41	59	30	23	52	121	28	30
FMO4	-0.268222	2.16785	3.45498	0.0630616	0.705196	203	154	189	134	85	99	194	75	51	104	173	147	175	178	133	102	169	138	143	79	123	106	157	113	243	111	125	51	131	75	57	54	130	142	178	162	110	145	98	80	144	210	143	153
FBXO17	-0.319889	3.16169	3.45488	0.0630652	0.705196	145	133	287	313	246	107	76	219	200	121	155	279	109	262	400	101	323	397	280	130	71	204	91	81	159	263	104	404	323	142	161	222	232	160	62	90	218	187	135	184	280	212	339	348
SLC13A2	-0.886781	0.858596	3.44698	0.0633673	0.705743	79	80	27	0	7	45	177	22	19	15	26	11	30	59	186	14	1	0	10	12	157	19	32	113	103	14	66	0	139	13	18	22	18	235	350	23	37	84	19	1	14	182	18	14
ADAM32	0.374774	-0.326734	3.44512	0.063439	0.705743	11	11	16	16	32	36	19	17	15	34	24	21	21	12	17	6	16	9	38	19	12	30	4	15	8	11	15	8	31	22	32	35	18	27	11	15	19	21	16	9	21	17	50	10
PDE8B	-0.336621	4.23956	3.44209	0.0635553	0.705743	254	196	499	825	820	201	281	287	278	513	202	731	168	579	619	217	553	564	533	337	146	290	254	265	218	582	157	867	890	243	317	304	424	564	204	477	638	651	275	651	327	551	628	863
KBTBD6	-0.300542	4.33733	3.4415	0.063578	0.705743	473	597	536	1105	680	299	377	495	458	345	394	691	338	623	552	261	1357	448	900	380	186	447	284	308	503	1081	386	1111	685	431	567	682	648	745	196	472	876	479	422	826	374	546	754	1229
GPR137C	-0.419794	-0.225926	3.44143	0.0635807	0.705743	32	11	28	1	28	15	41	19	3	17	22	30	7	62	43	25	6	33	8	19	18	2	8	20	16	12	14	43	19	20	11	13	16	42	9	1	26	50	7	12	28	31	29	17
TMEM237	-0.250782	4.0085	3.44125	0.0635877	0.705743	407	320	488	752	569	430	497	398	216	373	396	565	437	584	669	410	611	546	633	258	385	407	438	511	423	566	346	421	651	346	416	400	528	407	433	578	588	636	467	526	483	625	648	537
SYBU	-0.25689	3.90073	3.43994	0.0636378	0.705743	433	352	357	524	413	123	277	313	216	171	269	428	317	540	353	241	480	448	370	184	169	247	270	223	404	378	240	442	428	212	245	262	317	622	230	349	321	367	249	454	301	414	424	639
PCTP	-0.183046	3.19793	3.4397	0.0636473	0.705743	445	194	307	230	254	261	314	210	147	197	280	355	184	268	380	251	268	160	208	161	178	171	157	251	187	178	132	247	289	156	187	168	139	214	228	200	188	257	199	226	203	221	192	206
FAM200C	-0.338856	2.76615	3.43957	0.0636524	0.705743	158	196	238	309	252	97	82	258	105	131	111	132	129	156	155	139	348	179	190	58	43	234	93	77	147	327	100	376	231	80	164	215	182	190	57	185	354	132	123	195	242	178	292	382
PPA1	-0.312639	7.88137	3.43899	0.0636747	0.705743	5781	5473	4631	6571	7220	3785	6160	5991	3835	5088	11561	9369	5414	5027	7703	10122	5401	8695	12289	4927	9114	9651	10568	12063	9427	5165	7138	5264	4917	2865	4782	7730	4081	3020	4977	3384	4935	11077	11574	10396	9337	10956	7189	5903
TAS1R3	-0.327071	-0.926728	3.4371	0.0637474	0.705743	9	14	11	10	10	9	12	13	9	9	12	12	10	13	11	10	10	9	13	12	18	10	7	8	6	3	5	8	12	6	8	13	9	14	10	13	5	11	7	10	8	10	10	7
ALG3	-0.169613	4.16322	3.43703	0.0637503	0.705743	509	495	312	488	684	390	595	463	417	460	573	445	563	450	321	430	668	481	710	344	420	366	465	445	352	255	359	292	396	343	279	396	322	378	549	359	243	540	513	466	283	443	406	447
CYP26B1	0.743522	0.292309	3.43632	0.0637777	0.705743	2	0	60	19	0	0	62	8	6	9	3	0	0	60	23	1	23	62	28	16	13	66	1	62	2	6	16	9	35	22	28	67	59	6	19	14	67	16	32	9	25	9	29	18
ANKRD29	-0.435932	0.402829	3.43587	0.063795	0.705743	15	9	55	64	25	7	17	16	1	24	23	27	35	58	45	14	42	33	42	30	7	50	33	18	35	79	16	87	59	21	12	67	103	46	6	56	57	9	18	39	34	22	80	61
REG3A	-0.625949	11.081	3.43434	0.0638542	0.705743	118196	42252	83863	9451	34012	35728	161930	84454	15081	12756	64372	26049	58701	177287	152690	65998	51504	9794	10776	39182	124228	21883	53059	137418	204121	5488	46458	5255	94650	31185	13467	4341	8111	15295	302085	6012	26612	57563	43104	10998	26796	67188	9984	25142
PLEKHO1	0.33414	3.09456	3.43424	0.0638579	0.705743	186	175	122	202	129	142	136	134	144	180	227	156	93	63	166	154	214	305	163	110	243	179	152	90	111	113	125	101	185	139	170	184	118	206	86	152	93	138	188	138	134	166	159	118
ZSCAN25	0.18045	3.56793	3.43319	0.0638984	0.705743	282	293	241	158	247	299	255	262	184	293	267	212	192	239	259	184	333	284	501	179	283	222	235	282	308	212	316	165	376	237	240	391	251	330	274	205	238	318	226	240	259	316	230	279
SLC2A1	-0.447966	4.9168	3.42812	0.0640949	0.707074	991	450	528	317	258	327	967	460	405	349	504	546	362	528	728	268	558	673	653	256	575	364	316	1162	1176	227	457	333	615	509	394	532	537	613	718	546	201	615	395	465	1592	534	577	459
GAB3	0.269138	1.15753	3.4277	0.0641114	0.707074	47	77	46	83	63	23	62	98	77	37	60	59	33	31	67	38	47	43	50	26	47	41	77	68	56	56	40	54	109	57	58	64	40	82	16	47	43	80	58	60	19	139	63	33
PFN2	-0.342432	7.29688	3.42458	0.0642324	0.707729	4329	4611	4181	7940	4865	1447	2393	2844	1913	2328	2240	5871	2848	7628	3897	1947	6004	3325	4389	1813	1615	3418	2384	2528	5765	13008	2153	8043	6064	2692	4078	4070	6768	5664	1728	4415	6006	4453	3273	7239	4213	5403	6646	9359
FKBP11	-0.343125	5.35359	3.42341	0.064278	0.707729	910	1422	570	2359	1834	1419	886	537	1100	802	1884	1705	1557	1070	934	1958	894	1543	1904	1353	895	1546	1947	1671	1660	1226	1686	845	463	452	791	1076	915	540	569	389	324	826	1624	1600	1522	1508	1285	766
ENHO	-0.854155	-1.27975	3.42184	0.0643394	0.707729	0	2	4	24	0	0	0	1	0	3	1	8	13	9	1	2	11	4	3	7	1	2	0	0	1	7	1	7	7	0	4	2	2	9	0	7	9	7	0	4	5	2	1	12
S100A14	-0.370431	5.24726	3.42077	0.064381	0.707729	3036	1683	525	529	623	684	898	1489	676	1224	1903	791	987	869	413	822	1131	2497	862	800	1095	809	635	1128	1175	284	1650	455	377	1335	1426	625	938	1682	1534	1228	730	2327	986	1036	1322	1152	969	1091
FOSL1	0.413682	2.89201	3.42023	0.0644021	0.707729	176	181	63	137	155	142	109	169	148	277	194	200	94	33	17	156	236	125	355	143	97	123	42	96	46	63	189	56	292	290	210	425	69	444	112	219	43	192	138	263	154	88	262	81
PPCS	-0.246067	5.72503	3.41754	0.064507	0.708089	1272	1070	1700	1805	1455	1706	1551	1661	1135	1753	1430	1381	1571	2310	2635	1229	1795	1724	2182	1101	1290	1297	1281	2081	1481	1536	1019	1748	1793	1037	1031	1362	1477	1873	1485	1393	1515	1570	1357	1592	2129	2237	1795	1456
KDELR1	-0.150158	6.52764	3.41522	0.0645979	0.708089	2424	2405	2355	3269	3052	1662	2140	1690	1760	1819	2015	2953	1812	2781	2641	1779	3651	2448	2522	1282	1551	1886	1358	1911	2808	3254	1532	3094	2912	1441	1935	1869	2255	2055	1388	1472	1899	2309	1803	2097	1824	2469	2734	2249
RPE	-0.197315	5.47177	3.4147	0.0646183	0.708089	1213	1267	1344	1198	1173	1136	1530	1382	1146	1180	1500	1237	1176	1537	1521	926	1458	1305	1748	762	1078	1091	1107	1435	1390	1127	1151	850	1342	1196	980	1162	1103	1368	1751	1234	1158	1332	1236	1503	1624	1610	1470	1371
C2CD5	-0.182395	5.28683	3.41178	0.0647327	0.708089	786	1156	997	1738	908	513	736	871	645	504	604	1191	834	1178	1077	508	1090	870	1187	484	505	658	774	1105	1215	1845	528	1368	1157	718	836	847	1014	1129	743	1017	1289	895	913	1263	1098	1240	1561	1714
SLC11A1	0.454008	1.21993	3.41149	0.064744	0.708089	42	47	36	71	49	22	14	50	4	7	37	21	23	74	51	38	68	27	20	22	6	40	24	37	89	55	33	38	35	21	59	40	53	66	1	41	58	28	56	13	46	43	57	81
ARL1	-0.279724	7.64694	3.41012	0.0647979	0.708089	4902	5791	6325	8872	6286	5050	5326	5443	3550	6009	6225	8595	5003	6866	7052	3942	10490	4462	7745	2999	3760	4984	4523	5108	6579	8128	4587	6710	6077	5193	5402	6140	6538	6841	5322	6352	6031	5816	5184	7482	8202	6538	7762	7617
VTI1B	-0.155761	5.30234	3.41007	0.0647999	0.708089	896	682	956	1325	1442	690	978	773	651	693	899	1432	720	1429	1398	578	1332	1037	1039	584	758	619	711	797	763	1319	667	829	1193	647	667	820	822	986	848	739	732	1083	766	1188	871	1195	999	1087
ACVR1C	-0.495741	3.33362	3.4089	0.0648455	0.708089	172	119	279	572	233	141	135	145	190	316	102	696	149	502	415	98	482	143	349	243	19	182	123	58	138	572	185	562	544	133	167	245	373	226	10	183	485	114	196	310	276	253	557	476
LAMP5	-0.453348	1.72251	3.40771	0.0648926	0.708089	89	157	135	77	45	55	66	82	74	166	102	59	76	75	179	40	60	190	41	26	18	81	94	43	122	161	11	291	198	112	154	117	102	65	17	78	166	71	109	83	40	96	162	99
TERF2	-0.151423	4.11946	3.40758	0.0648977	0.708089	627	510	440	613	512	325	415	439	335	290	363	618	444	504	505	439	888	404	558	209	170	343	334	365	391	452	382	654	540	316	395	438	522	547	393	417	516	485	364	411	267	467	454	451
SHOC1	0.514005	-0.508408	3.40319	0.0650706	0.709113	0	3	3	4	8	12	16	47	3	13	4	25	4	19	4	18	30	18	20	12	19	27	12	8	5	10	25	15	24	21	16	22	17	15	6	9	29	5	21	7	24	8	6	29
MMRN2	0.330519	1.82806	3.40284	0.0650843	0.709113	24	98	38	126	47	104	37	86	103	127	61	135	80	138	56	83	113	124	111	52	37	91	56	63	42	80	58	109	107	56	94	71	28	87	21	64	55	50	123	110	67	69	110	49
ARSL	-0.30013	4.09509	3.40135	0.0651431	0.709249	726	564	359	268	489	533	610	371	429	361	404	374	460	693	637	339	233	255	518	364	293	311	617	359	746	322	391	351	347	249	265	241	448	214	291	317	357	374	371	211	348	462	337	434
FCGR3A	0.813945	-0.925026	3.3995	0.0652163	0.709541	0	21	6	22	8	0	13	12	22	0	0	0	7	0	14	25	18	0	0	0	0	0	0	0	4	12	0	4	24	8	8	10	7	7	4	8	0	10	7	1	3	27	16	5
METTL25	-0.312967	2.9547	3.3949	0.0653984	0.710134	220	188	269	322	301	186	274	250	284	231	284	218	200	239	410	171	304	261	271	91	169	152	130	301	284	245	205	329	237	190	180	151	254	253	167	180	290	251	195	285	241	332	231	293
ULBP2	0.49538	2.28478	3.39469	0.0654066	0.710134	216	137	122	18	17	112	247	21	130	251	62	114	56	93	83	88	196	100	102	97	86	125	151	261	81	186	54	44	123	110	148	241	66	65	131	253	63	132	158	101	171	162	350	98
GGH	-0.30443	2.59282	3.3946	0.0654101	0.710134	123	98	109	223	198	201	155	107	151	165	241	146	221	175	192	238	74	229	190	98	214	84	265	221	231	110	215	94	169	63	74	144	101	157	54	127	176	213	216	121	168	277	127	155
DEFB103B	-0.843354	-1.33216	3.39274	0.0654842	0.710433	4	21	3	10	2	9	26	11	26	40	8	5	9	0	5	7	2	11	22	5	22	24	18	4	2	4	5	2	12	19	13	38	8	19	9	74	0	4	5	9	5	8	25	4
ARMCX1	-0.164632	4.50464	3.38984	0.0655993	0.710444	534	506	565	831	663	371	435	552	389	542	583	610	302	750	634	353	1018	530	679	397	345	596	512	471	554	844	525	807	831	539	795	677	810	696	554	571	707	528	476	725	631	567	860	983
POU5F2	0.659174	0.0936879	3.38979	0.0656013	0.710444	13	57	10	41	67	39	53	92	0	11	28	21	15	21	2	16	95	27	49	8	13	21	4	9	30	10	38	36	38	14	54	19	28	29	19	16	24	8	19	14	14	14	11	26
TMCC1	-0.157948	5.34099	3.38921	0.0656245	0.710444	1409	1206	1006	1694	1168	782	1193	1045	751	786	939	856	853	1219	1154	840	1503	1137	1121	554	852	655	829	1560	1774	1281	735	1066	1174	699	825	889	1044	1526	917	1279	1439	1190	964	1248	1187	1153	1122	1691
TUBA1A	-0.413494	10.8164	3.38519	0.0657845	0.711177	59353	70417	48122	112427	66930	40959	40992	57404	28828	31022	41743	70496	38525	38457	57326	35731	98810	49452	53228	33248	41988	77615	43185	38688	50564	130100	32450	69333	63769	40516	45182	60545	58329	71779	42419	54430	81598	59642	69198	106970	56522	76775	124989	69619
STK32B	0.409272	1.69206	3.38518	0.0657852	0.711177	57	92	114	87	70	9	69	34	13	54	38	33	50	108	61	13	67	69	77	47	19	61	75	43	47	166	20	151	204	48	36	71	243	34	8	59	78	13	30	56	24	46	216	107
CIBAR1	-0.194259	3.98709	3.38176	0.0659214	0.711915	322	261	449	667	562	353	338	408	284	318	342	551	303	513	600	412	572	547	531	311	317	391	319	385	509	658	239	623	503	224	382	472	449	304	248	362	477	475	405	663	504	524	532	682
RMND1	-0.235486	4.3091	3.38052	0.0659711	0.711915	653	492	530	569	563	656	469	668	421	416	568	526	612	726	633	449	628	602	691	281	451	574	600	502	633	757	561	545	647	451	576	608	730	775	667	553	637	641	423	534	566	632	720	633
TDRD9	0.549222	2.62044	3.37933	0.0660189	0.711915	268	300	60	981	886	18	56	72	16	66	59	246	134	133	117	22	650	71	218	58	1	60	52	39	101	173	68	66	58	76	60	124	162	59	47	85	112	82	57	94	22	100	189	251
SSPN	-0.225498	2.72185	3.37881	0.0660396	0.711915	131	145	267	153	120	207	189	249	139	236	175	146	110	148	231	106	122	174	186	90	186	143	96	179	198	76	91	223	296	134	139	167	112	271	103	245	211	165	119	161	195	234	176	188
UGT2B7	-0.53071	3.95473	3.37404	0.0662313	0.713162	1066	457	849	112	403	651	1091	546	240	157	274	205	848	1553	1525	361	514	173	240	303	310	130	508	1150	1206	121	1465	142	790	266	193	84	283	256	651	212	259	721	310	233	768	509	284	415
TIGD6	-0.195387	2.82664	3.37091	0.066357	0.713162	249	184	136	252	249	109	115	142	89	169	134	235	136	157	244	123	315	147	277	139	141	182	160	129	206	296	160	228	159	95	205	202	223	323	108	137	186	127	132	325	148	245	244	327
HYCC2	-0.168958	4.95831	3.3697	0.0664057	0.713162	839	794	775	1103	902	668	749	914	467	708	745	933	833	745	858	499	1250	560	989	545	574	644	467	694	1088	1355	661	1329	1073	791	765	989	984	1067	744	1023	998	1083	620	1064	809	984	1073	1032
GUCA2A	-0.585438	0.113087	3.36954	0.0664124	0.713162	68	25	65	37	24	47	50	61	5	10	5	23	18	76	56	34	14	27	50	45	8	22	26	74	56	3	19	26	23	16	29	21	30	72	40	74	32	133	11	13	17	77	33	21
JAK1	0.158511	7.66601	3.36945	0.0664158	0.713162	4898	4018	4631	6404	5003	4455	5688	4843	3459	3711	4830	4219	4483	4318	6777	3752	7444	4797	7990	2946	3901	3799	3743	4667	5162	3450	4100	3340	5088	4192	3894	6130	3889	4926	4785	4478	3995	4560	4779	4876	4058	4538	7074	3878
PBK	-0.826012	-0.318968	3.36898	0.066435	0.713162	5	7	108	7	6	6	19	10	0	10	15	1	14	6	134	10	11	178	20	0	18	16	15	48	5	5	11	71	90	9	7	12	33	14	17	4	61	38	9	4	45	78	18	29
MAP6D1	0.344425	0.876313	3.36082	0.0667648	0.715257	50	45	10	76	63	59	41	87	27	29	43	47	50	41	16	9	49	36	34	32	15	55	23	24	25	20	7	32	28	20	90	55	43	31	29	41	22	30	36	35	36	35	34	59
ZNF484	-0.24971	3.07301	3.3595	0.0668182	0.715257	145	328	271	394	325	275	266	279	234	136	193	313	264	233	317	145	500	203	410	120	97	120	190	223	211	283	117	327	161	177	272	259	249	229	178	234	282	203	197	324	281	225	303	341
MORF4L2	-0.277714	8.55701	3.35896	0.0668404	0.715257	13023	12401	10497	14908	11891	8536	11139	10817	6640	10314	12069	13357	9977	14185	12311	7790	17557	9237	15016	6200	10473	10099	9369	11068	12631	13901	9413	9742	11983	10212	9724	11583	10866	13996	11378	11326	9386	12679	10255	15114	17178	12975	14738	13207
COLEC12	0.685372	-0.756333	3.35767	0.0668927	0.715257	7	1	2	12	7	13	1	5	17	0	36	6	2	11	7	15	11	6	8	0	5	2	0	0	5	2	0	8	38	1	9	8	3	6	2	10	5	9	6	2	10	5	1	3
CD3D	0.642921	0.101106	3.35758	0.0668963	0.715257	20	49	54	10	0	52	3	17	45	7	22	26	58	42	85	99	31	34	22	23	9	1	11	25	82	17	5	7	9	8	12	4	22	38	22	12	23	61	27	35	21	33	14	10
RNF6	-0.229992	6.60446	3.35723	0.0669107	0.715257	3108	2693	2900	4483	3720	2757	2539	2257	2253	2380	2489	3438	2473	3418	3041	1995	4144	2261	3635	1542	2080	1852	1966	2339	2628	4510	2053	3214	3259	2133	2374	3127	3006	3563	2211	2449	2913	3500	2616	3556	2629	3164	3479	3211
BOLA1	-0.248006	1.99234	3.35416	0.0670355	0.71604	107	59	136	143	163	52	158	108	66	85	110	107	135	124	99	75	233	87	100	57	104	85	81	114	102	120	54	100	58	10	62	86	52	90	43	69	84	81	99	123	70	101	72	115
SND1	-0.118326	7.59365	3.35313	0.0670775	0.71604	6566	7118	3765	4715	5261	4855	4805	3474	3555	4374	5707	5790	4517	4608	4197	3514	6154	4183	6239	3169	4064	4201	3820	4753	6389	7342	4810	5097	4363	3616	4909	4839	4049	5070	4128	4663	3853	5400	4818	5467	3959	5095	5477	5243
NKG7	0.497885	-0.56319	3.34754	0.0673053	0.716685	21	24	37	5	7	26	6	15	3	12	14	0	25	6	25	41	21	29	30	18	0	0	7	22	40	21	11	16	15	13	19	7	20	14	16	8	14	20	19	12	24	19	7	15
PIP5K1B	-0.437604	3.29309	3.34699	0.0673279	0.716685	409	126	368	78	244	198	814	269	161	116	569	136	231	645	637	321	96	147	99	145	678	156	235	516	453	60	224	68	284	189	93	142	154	166	876	171	114	500	134	128	212	889	171	68
SIX1	0.698305	-1.44559	3.34669	0.0673405	0.716685	0	10	6	8	7	3	53	3	17	0	2	2	0	8	0	10	1	4	6	8	4	28	0	0	2	8	2	11	6	6	0	6	9	9	7	8	11	1	13	2	6	1	12	20
RIPOR3	0.417132	0.975003	3.34667	0.067341	0.716685	26	31	15	132	87	18	32	37	17	11	24	42	7	29	91	13	90	24	79	21	10	38	8	17	41	51	20	43	70	27	50	38	34	44	52	22	35	22	48	33	20	39	23	56
BDH1	-0.396415	1.94197	3.34541	0.0673926	0.716685	52	68	80	82	85	43	83	67	56	64	43	40	74	81	94	47	72	71	69	46	24	46	34	47	57	66	65	120	116	44	83	84	74	94	34	59	85	49	58	40	33	124	60	97
STYK1	-0.655443	-0.859152	3.34428	0.0674388	0.716685	30	39	7	8	2	8	22	1	24	15	5	0	11	9	16	0	10	3	2	3	31	2	26	45	19	4	8	11	17	5	2	17	19	68	11	12	1	61	11	7	0	14	1	29
SEC22B	-0.310291	7.5609	3.34362	0.0674659	0.716685	5180	5249	6288	7630	6233	5321	5636	5989	4094	5308	5162	8552	4728	6088	7482	3922	10696	4544	8051	3872	3674	5032	3772	5653	5210	8280	4277	7186	5955	4543	4772	5821	5669	5727	4766	5952	6178	6285	5194	7503	6100	7049	7633	7493
ZFP91	0.106547	6.2117	3.34222	0.0675234	0.716725	1744	1948	1577	1712	1510	1650	2048	1761	1438	1681	1872	2090	1883	2152	2163	1339	2411	1843	2313	1184	1697	1235	1433	1691	1562	1518	1536	1633	2221	1658	1621	1801	1668	2058	1989	1940	1534	2063	2075	1939	1522	2087	2206	2012
CENPQ	-0.320655	3.47858	3.34003	0.0676134	0.716725	360	235	421	429	371	228	453	367	204	311	319	352	318	315	622	264	522	267	515	212	178	251	280	340	351	261	234	486	361	243	304	335	464	415	242	269	455	244	337	350	647	426	508	393
FNTB	-0.187612	3.30124	3.33841	0.0676798	0.716725	419	515	255	277	329	201	249	289	92	182	274	223	163	303	271	218	254	237	333	150	183	241	207	300	445	518	219	363	395	185	197	235	310	299	233	199	262	248	144	265	185	302	299	360
SCARF2	0.937191	0.384813	3.33683	0.0677448	0.716725	1	1	1	15	4	0	5	11	0	6	1	2	6	4	4	9	2	3	7	18	3	7	3	1	8	5	1	5	9	4	4	3	8	4	0	2	2	2	11	3	8	4	6	4
MCCC1	-0.206389	5.41542	3.3365	0.0677585	0.716725	1161	1309	1003	927	1052	1012	1457	1444	704	956	1294	817	971	2426	1568	819	788	932	1134	764	988	707	1130	1679	2181	851	967	899	1483	640	852	755	952	986	1834	903	1022	1566	893	929	768	1365	906	1086
CHEK1	-0.218775	1.37306	3.33605	0.0677772	0.716725	68	92	79	85	63	64	68	82	32	89	47	29	34	63	69	49	50	54	81	81	55	67	67	37	66	39	83	91	89	122	61	69	55	77	67	98	70	66	66	101	72	87	81	56
MEST	-0.254496	6.0592	3.33555	0.0677977	0.716725	1965	1896	1688	1410	2172	2794	1907	1975	1327	2585	3302	2812	2223	2809	2989	2286	1405	1098	2086	1329	1497	1557	2147	2354	1961	1492	1624	1279	1571	1961	1869	1655	1286	1481	2262	1972	1447	1830	2395	1675	1988	2290	1873	1524
ABI3BP	0.341996	3.72775	3.33399	0.067862	0.71691	347	648	374	703	286	238	350	171	151	144	334	401	272	202	345	144	1122	335	712	194	11	407	131	350	398	753	206	272	289	245	449	303	277	416	76	242	212	346	360	483	332	257	550	341
DDHD1	0.16175	3.50206	3.33173	0.0679554	0.717401	323	196	228	385	247	185	258	255	263	292	220	259	220	289	242	290	391	278	283	205	157	150	204	249	173	202	203	255	382	238	229	245	210	287	327	194	245	309	298	261	139	279	203	308
IRX2	0.486945	4.16229	3.32954	0.0680458	0.71759	167	438	799	739	606	147	186	146	253	267	133	291	216	709	365	96	652	232	490	323	54	434	126	162	302	850	161	1168	638	189	221	589	1158	139	21	238	617	50	337	393	649	263	986	688
SHH	0.442302	0.488793	3.32903	0.0680672	0.71759	36	60	43	4	5	61	77	23	8	1	19	16	28	51	27	27	29	6	58	22	14	48	3	22	50	16	95	5	26	8	25	5	50	43	10	11	21	75	56	17	10	11	46	25
SULT1A1	-0.329171	3.00617	3.32732	0.0681377	0.717839	289	262	522	201	117	76	667	210	46	129	186	105	138	324	279	274	224	370	94	174	338	118	173	420	549	208	156	177	373	90	164	74	163	199	369	93	187	315	177	104	56	165	56	266
RNF128	-0.282808	4.95357	3.3243	0.0682629	0.718149	593	493	816	1179	753	426	659	727	453	426	544	1027	700	1214	1470	429	1099	486	677	470	488	365	436	1200	620	527	493	538	683	391	422	707	495	661	584	502	383	882	505	705	860	699	731	617
TP53TG3D	0.69142	-1.6257	3.32279	0.0683258	0.718149	11	5	17	0	7	11	4	1	0	2	1	1	14	8	3	2	3	3	0	1	7	3	10	0	1	0	0	17	11	0	25	1	30	0	5	2	26	15	15	2	4	21	0	1
PAPSS1	-0.19986	5.99675	3.32241	0.0683415	0.718149	2340	2881	1830	1974	1536	1622	2166	1724	1267	1213	1918	2024	1719	2729	2759	1529	1667	1561	1761	1124	1555	1248	1195	1950	3045	2358	1711	1511	1760	1436	1570	1371	1771	1667	1889	1618	1601	2254	1818	1947	2038	2348	2058	1968
ORAI3	-0.175786	3.49017	3.32209	0.0683549	0.718149	254	294	385	421	327	173	240	238	155	219	186	265	195	333	362	184	456	295	292	223	198	216	140	378	289	364	122	370	395	140	191	228	343	294	250	228	338	303	272	230	208	360	238	318
COQ6	-0.211889	3.3756	3.31795	0.0685273	0.719466	240	239	169	483	440	193	235	190	188	230	274	319	242	338	261	217	430	342	509	206	334	327	244	325	283	450	169	287	242	123	195	304	238	248	150	165	230	387	354	452	238	295	382	430
PERP	-0.301524	6.90698	3.31348	0.0687139	0.720648	3041	1602	2438	2628	2061	1924	3366	2547	2293	2305	2619	2089	1717	2810	3749	2005	2538	2075	2095	1839	4359	1547	2560	2553	1531	1104	1335	2307	3146	1466	1581	1545	1841	3003	2680	2295	2526	3648	2125	1864	2630	2796	2105	2129
PTPN12	0.186872	5.79254	3.313	0.0687341	0.720648	1527	1177	1093	1398	1099	1575	1817	1609	1221	1465	1583	1176	1484	1033	1837	1538	1677	1232	2038	897	1328	1074	1032	1392	1046	606	1101	686	1235	1415	1050	1219	780	1433	1185	1299	845	1442	1310	1102	1739	1194	1028	1095
COL14A1	0.573702	0.863596	3.30754	0.0689626	0.722549	2	52	34	83	58	4	3	11	34	28	4	89	5	3	90	38	62	87	45	33	0	54	19	37	8	114	7	57	36	62	81	66	30	46	6	23	19	6	23	36	29	83	53	20
SLC39A11	-0.249482	4.76076	3.30344	0.069135	0.723429	1100	912	884	584	636	682	1054	894	418	502	861	675	670	1279	1064	418	690	821	906	606	1018	709	917	1269	1323	771	570	711	899	535	528	590	842	748	1176	802	765	1231	704	624	482	1025	756	708
NDUFS7	-0.274229	5.02912	3.30329	0.0691412	0.723429	2004	2184	990	1284	1090	590	983	821	622	665	758	979	693	1124	676	761	1370	962	1244	694	777	876	731	615	1852	1878	570	1118	531	225	558	645	1194	765	229	453	894	967	744	856	571	1029	886	1184
RAB6B	-0.429702	2.253	3.29984	0.0692865	0.724453	63	93	92	126	122	30	74	57	78	70	46	120	64	92	145	54	149	89	70	55	26	65	14	46	72	153	47	77	139	58	83	74	98	87	28	61	89	66	69	98	85	63	82	80
TNS3	0.172109	6.24065	3.29803	0.0693632	0.72476	1598	1477	1759	2155	1820	1514	1595	1420	1478	1669	1447	1946	1464	1474	1765	1320	2372	2274	2414	1086	1227	1437	1455	1566	1329	1070	1267	1813	1952	1292	1697	2122	1626	1863	1114	1532	1462	1345	1869	1299	1538	1592	1889	1740
CDS2	-0.172465	6.63896	3.29675	0.069417	0.724769	2418	2693	2931	5248	3368	1654	1991	2304	1601	2298	2176	3886	1728	3563	3277	1460	4305	2780	3460	2104	1657	2112	1757	1913	3059	3812	1392	4144	3172	1770	2276	2166	2581	3004	1585	2508	2824	3316	2219	4018	2534	2875	3989	4778
IL10RA	0.492188	0.567433	3.29576	0.0694588	0.724769	1	14	24	27	30	13	19	19	14	16	8	21	22	21	22	8	49	19	48	22	11	8	11	11	17	31	13	45	30	6	9	23	30	20	4	17	25	13	14	17	16	30	50	21
ALDOB	0.59647	7.63157	3.28712	0.0698254	0.72793	9633	1752	4486	924	2986	4601	4556	2956	335	696	3876	2287	6306	17431	8779	8081	2093	1558	923	2526	2117	1112	1708	6355	12558	1782	7719	2708	3028	1499	1587	697	783	1031	4247	170	1032	1876	4967	464	2314	2499	663	1026
LRP8	0.259485	3.57637	3.28638	0.0698569	0.72793	247	237	269	319	345	280	301	278	273	315	327	613	452	417	222	213	636	219	411	174	166	245	188	275	149	197	127	272	319	267	334	323	222	382	267	329	204	337	214	349	168	193	335	296
RRM1	-0.208485	6.02231	3.28231	0.0700302	0.728391	2028	2313	2432	2433	1461	1710	1731	1749	1386	1688	1754	1981	1655	2178	2076	1189	2563	1931	2052	948	1253	1555	1311	2323	2273	2474	1436	1999	1794	1663	1692	1926	2055	2027	1679	1917	1547	2153	1860	1856	2698	2502	2593	2251
KCND3	0.262586	4.79943	3.28034	0.0701142	0.728391	565	693	638	1831	1212	416	493	637	301	662	449	590	833	915	777	546	1444	433	862	626	218	462	517	567	752	1403	470	927	863	625	570	899	971	413	657	395	697	369	729	476	635	546	1235	1235
SORL1	-0.381591	7.29985	3.27989	0.0701336	0.728391	2471	2360	4396	9408	5120	1388	2298	3832	3084	2572	1692	8395	1829	5366	5156	1350	4939	4941	6094	1708	654	3231	1867	1475	2432	5203	1139	9139	5758	2027	3969	3714	4714	5101	744	4389	5277	4713	2639	5528	2925	4742	4837	7213
GTF3C3	-0.159408	5.25648	3.27884	0.0701787	0.728391	1012	1056	822	1264	902	776	1240	1016	672	1046	1129	989	884	1150	972	770	1142	1390	1339	558	993	1073	916	1047	1076	1152	798	1101	1550	1043	1185	1259	999	1532	1121	1318	1030	1198	1105	997	1052	1233	885	1193
PRPSAP2	-0.151695	4.58931	3.27753	0.0702346	0.728391	660	681	725	897	769	411	665	617	495	589	640	950	513	677	1026	430	1046	546	891	364	493	540	471	509	668	879	411	819	882	510	606	509	724	749	575	628	699	630	471	771	543	648	778	987
ATP5F1B	-0.212291	9.26076	3.27517	0.0703358	0.728391	27804	22608	18268	19716	18366	15165	19164	15693	11018	16286	20869	19928	16408	21221	16541	14335	23007	17601	22721	10201	17148	14774	14918	18864	23474	23036	14134	18864	21033	13337	15131	17516	16748	17736	18615	15660	14166	20530	17068	19233	15909	21791	20884	19163
CD200	-0.480302	6.01526	3.27508	0.0703396	0.728391	1287	1778	2405	5620	3199	679	1100	1374	1114	1399	914	2978	1240	2756	2005	711	3881	1702	2505	738	288	1982	780	420	1604	3976	802	4925	2579	936	1504	1979	3134	2247	97	1607	2952	1352	1192	2940	2050	1704	3551	3727
NUDT7	-0.353383	3.57656	3.2746	0.0703602	0.728391	407	335	441	737	349	334	379	374	214	306	327	337	317	527	720	262	582	395	414	140	173	363	263	300	367	536	216	525	424	165	233	270	298	386	385	318	472	371	279	498	332	494	541	551
DHCR7	-0.201067	5.56541	3.27404	0.0703843	0.728391	2755	2328	790	934	1271	1784	1413	1068	930	1296	1808	1377	1499	1167	1340	1313	1233	1607	1141	916	965	1021	1101	1220	1554	1171	1110	981	1066	499	1005	674	754	901	1152	1000	669	1770	1375	843	724	1272	1076	998
CENPU	-0.264927	2.08358	3.27238	0.0704553	0.728391	89	85	110	126	117	114	165	135	62	154	127	72	114	159	186	94	109	218	187	72	128	116	75	154	118	81	146	229	129	92	130	88	135	115	79	92	145	110	125	145	146	167	207	165
SURF4	-0.307564	7.30114	3.27206	0.0704689	0.728391	2790	2209	2808	3415	3824	2062	2808	2197	2220	2715	2809	7727	2253	3795	3668	2222	3971	2110	3543	2025	2284	2369	2051	2147	2172	4262	2134	4896	3912	1840	2368	2434	2982	3653	1922	2924	2980	3988	2574	3420	2297	3040	3503	3595
LCA5	-0.189183	3.89241	3.27198	0.0704726	0.728391	260	392	488	529	562	317	319	466	237	298	320	396	354	563	361	259	526	400	367	246	248	224	319	405	370	504	320	451	566	297	308	388	446	431	434	403	562	447	461	473	515	664	535	655
LRP6	0.180964	4.78256	3.26879	0.0706095	0.729314	482	385	510	724	769	455	642	687	536	658	658	700	482	941	825	459	752	505	670	513	468	374	469	474	439	507	470	406	710	514	431	623	470	567	642	571	537	692	554	607	412	852	537	640
GRIK1	0.449328	0.114939	3.26756	0.0706626	0.729369	6	17	15	14	38	40	56	48	21	30	36	10	56	11	32	35	31	44	44	20	24	11	40	15	21	12	43	18	17	28	25	41	35	29	23	13	22	10	28	14	19	7	26	32
CCDC110	-0.343865	3.43294	3.26502	0.070772	0.730006	142	207	247	437	320	345	395	309	240	345	490	533	276	300	532	343	639	320	276	157	165	170	116	427	212	348	108	500	271	184	403	192	240	400	195	305	303	309	405	371	606	455	305	563
AOC1	0.70463	-0.573814	3.26122	0.0709363	0.731208	29	35	9	6	1	0	14	9	1	0	9	12	0	12	4	7	17	5	13	1	3	13	9	1	11	23	4	4	21	4	0	1	21	9	3	9	28	38	8	5	8	1	3	17
DUSP23	0.391231	3.64269	3.25996	0.0709907	0.731276	192	132	191	140	213	319	472	180	178	172	300	177	291	239	470	424	193	154	248	196	513	150	224	353	143	59	162	87	184	155	149	123	98	115	317	131	101	176	260	120	190	293	152	107
MRPL34	-0.293982	3.91734	3.25816	0.071069	0.731517	290	204	227	637	505	210	269	187	161	224	249	393	257	302	257	274	344	878	813	422	676	460	795	412	427	508	232	271	274	95	143	354	239	300	164	170	200	443	616	443	377	718	342	561
KRT75	-0.876083	-0.391954	3.25722	0.0711097	0.731517	37	113	0	0	3	9	8	17	11	4	12	9	5	0	20	4	6	0	31	28	36	17	23	0	5	8	18	5	9	6	12	3	17	24	15	43	8	41	6	7	21	9	9	4
PPAT	-0.267869	4.20307	3.25595	0.0711646	0.73159	416	372	413	581	649	574	638	617	445	715	736	720	473	504	552	397	830	454	709	261	346	425	305	337	333	874	581	585	485	660	564	741	430	773	417	612	520	456	544	674	575	505	668	696
TNIP3	0.732983	-1.00879	3.25397	0.0712505	0.731981	3	17	9	9	21	0	16	1	4	0	5	0	8	6	35	0	30	3	78	0	32	3	0	18	38	8	8	13	8	3	10	50	6	8	18	10	5	3	10	2	1	6	3	1
GPR84	0.572847	0.0456204	3.2517	0.0713495	0.732506	36	74	19	12	12	13	2	42	11	6	33	0	23	15	35	22	59	18	17	13	5	13	20	33	179	40	7	17	41	42	66	21	15	14	15	1	39	16	33	22	11	21	16	7
PI3	0.516526	2.92709	3.25028	0.0714112	0.732647	309	405	122	135	127	109	272	118	86	51	197	111	381	96	21	169	364	47	737	35	100	72	24	212	431	99	189	46	111	62	97	171	68	330	98	133	43	420	104	197	58	93	96	40
BEX5	-0.436274	5.01094	3.24559	0.0716158	0.734148	1201	1038	1512	2416	1304	652	836	1026	432	778	664	1826	666	1388	1218	511	2593	774	1023	538	428	1124	778	595	881	2089	463	1344	1399	603	740	668	1467	1269	433	994	1120	1123	743	1370	822	946	1004	1605
PRG4	0.55908	6.86868	3.24416	0.0716786	0.734148	2303	3270	4073	11887	9124	676	2644	1681	787	778	786	5645	3973	1964	1717	454	10218	817	5220	1263	135	1161	284	430	3127	4748	1462	1842	1794	1383	1659	1492	1416	1480	196	1306	2289	1706	1729	5132	3016	5228	4383	6711
DEFB103A	-0.831933	-1.33244	3.24363	0.0717014	0.734148	4	20	3	9	2	9	26	11	26	39	8	5	9	0	4	7	2	11	23	5	23	24	18	4	2	4	5	2	12	19	13	38	8	19	9	75	0	4	5	9	5	8	25	4
PSG1	-0.623457	-0.0268429	3.24018	0.0718528	0.735149	83	10	2	8	13	57	13	48	11	7	21	15	3	26	41	14	5	26	4	2	41	20	101	33	4	10	3	5	40	12	20	1	34	59	109	22	5	53	12	9	18	39	7	19
SH3BGRL2	-0.162176	5.90747	3.23921	0.0718953	0.735149	1904	1661	2193	2304	1614	1383	2093	1693	975	1136	1349	1677	1273	2525	2038	692	2577	1138	1781	1223	1582	1154	1542	1649	1326	1319	994	1373	1932	1131	1010	1308	1318	2312	1592	1771	1695	2668	1033	1250	1069	2240	1454	1984
NUDT13	0.230164	1.64375	3.23598	0.072037	0.736106	70	64	51	96	130	67	68	82	39	60	67	58	51	100	57	44	145	55	77	52	80	38	39	117	76	71	54	106	63	50	87	77	93	60	59	35	64	76	83	51	37	91	80	131
FCF1	-0.133202	4.43374	3.2296	0.0723182	0.737588	535	584	535	535	511	474	590	473	384	375	601	545	436	610	683	374	709	454	544	320	389	387	267	494	843	561	469	444	503	509	489	539	505	628	557	522	542	609	422	542	605	668	675	599
MITF	-0.26752	3.66553	3.22869	0.0723586	0.737588	626	347	385	221	276	393	499	487	292	366	415	247	378	582	636	406	204	350	386	172	370	160	300	675	489	214	254	155	412	281	216	270	257	352	635	249	277	731	363	238	308	647	266	378
CCDC127	-0.156522	4.34959	3.2269	0.0724375	0.737588	647	688	662	648	638	585	619	539	388	586	525	612	494	764	662	503	740	314	681	361	556	501	445	653	538	579	451	527	707	331	402	471	480	653	626	470	486	683	561	653	586	681	706	605
RNASEL	-0.211379	3.82959	3.22661	0.0724505	0.737588	512	426	333	495	374	198	342	368	181	255	297	183	366	423	364	212	421	314	531	232	279	312	298	655	598	515	226	453	508	138	329	357	326	551	403	394	514	336	174	406	368	684	469	634
SIGLEC7	0.637109	-1.49921	3.22632	0.0724634	0.737588	1	12	6	18	19	0	0	0	15	0	0	0	0	10	10	0	11	3	4	1	0	14	2	5	32	13	1	7	24	1	11	12	10	13	1	0	18	2	15	0	7	7	3	11
VGF	0.704477	7.34931	3.22584	0.0724845	0.737588	1121	1594	1794	3746	4595	325	1005	676	833	682	408	2111	1171	2103	1088	646	3277	2800	3197	1147	270	2242	515	792	537	1811	395	2404	1798	684	1675	1848	2377	1212	111	673	2091	500	2181	1467	982	1174	3548	2555
ZNF627	-0.174351	4.31423	3.22491	0.0725259	0.737588	419	515	628	610	548	433	590	523	426	557	496	436	507	578	862	480	629	707	676	195	391	492	451	545	470	722	432	557	696	508	420	514	503	639	510	689	584	474	501	629	707	491	724	733
ANKRD46	-0.26599	4.70135	3.22396	0.0725678	0.737588	600	656	846	1114	690	601	672	768	516	616	741	755	820	873	955	473	1267	643	833	285	480	625	474	749	627	1136	416	1176	706	635	710	829	854	974	627	970	867	678	695	1042	1212	738	1168	1186
ZNF681	0.239332	2.64948	3.22157	0.0726741	0.73787	123	191	235	198	171	136	113	185	102	270	130	199	185	167	311	162	228	110	185	96	69	126	89	104	183	136	104	174	171	167	164	136	166	133	109	279	158	119	132	96	196	180	213	170
NUDT22	-0.156143	3.97657	3.22116	0.072692	0.73787	527	470	410	608	533	304	461	383	321	374	447	468	377	606	462	302	554	425	378	203	342	432	344	395	584	482	266	284	299	196	265	343	343	433	249	238	318	513	305	366	363	484	362	378
PRKG1	0.286573	1.97222	3.21874	0.0727996	0.738472	39	81	30	115	96	105	158	97	54	52	89	77	86	85	152	70	213	97	111	69	48	88	18	154	82	33	36	50	182	74	102	107	78	138	94	45	96	106	27	48	87	100	95	61
GPNMB	0.413362	5.41521	3.21698	0.0728781	0.738778	1121	1913	1347	2865	763	275	532	787	456	488	436	787	742	908	1322	730	2405	1626	526	446	78	1104	644	505	1703	1574	394	1812	3506	589	1585	879	1427	1286	259	736	1432	486	1162	649	1189	1538	1149	1647
MIGA1	-0.145409	5.19953	3.21427	0.0729987	0.739511	1212	1068	1111	1161	1152	762	1012	1063	638	902	876	930	691	1301	1178	666	1418	1136	1236	754	758	800	671	999	1057	1222	606	1134	1205	821	798	910	1062	1255	1010	852	1091	1034	841	1053	806	1074	1055	1299
HEMK1	-0.269014	3.60617	3.21207	0.0730968	0.739802	374	290	200	231	246	224	326	202	135	234	322	204	153	284	267	301	333	278	267	146	250	254	209	210	304	273	283	222	285	173	235	252	290	274	279	218	235	319	202	276	221	250	279	168
MUC21	1.39428	-0.0527292	3.20795	0.0732811	0.739802	26	261	0	0	0	6	94	0	0	0	0	0	7	38	12	0	4	0	1	0	4	0	11	0	0	5	0	0	10	0	2	0	0	77	0	13	0	230	5	0	0	0	0	0
SLC25A15	-0.254483	2.84141	3.20547	0.0733923	0.739802	211	132	166	98	173	307	312	154	167	179	251	171	218	242	198	177	149	98	137	125	152	131	198	376	172	80	223	128	184	153	161	109	110	115	354	211	77	212	184	122	144	260	133	108
RGN	-0.246794	3.58033	3.20518	0.0734054	0.739802	655	302	398	564	269	235	418	437	145	235	236	354	137	515	454	219	391	251	376	230	313	285	334	389	449	659	259	318	359	173	174	174	287	437	254	184	491	459	305	215	238	474	268	584
RPN1	-0.145403	7.60727	3.20404	0.0734565	0.739802	8076	8030	3789	5094	5486	3709	5056	3958	3519	4136	6040	6753	5468	5944	4754	3869	6149	4067	5923	2986	4883	4415	4236	4492	9376	8232	5137	4452	4596	3594	3471	5187	4324	5304	3798	4172	3584	6334	4782	5459	6663	6301	6126	4714
PSORS1C1	-0.569364	0.568899	3.20198	0.0735491	0.739802	169	136	8	20	47	67	150	9	2	50	47	23	2	37	112	59	25	26	8	8	150	30	13	2	66	9	11	22	41	29	7	20	47	66	41	81	48	16	44	1	25	33	19	24
LMO3	0.405167	3.7171	3.20163	0.0735649	0.739802	196	292	394	425	329	485	290	444	443	363	523	283	221	425	535	487	294	208	412	175	103	250	354	246	701	377	675	274	140	182	188	189	123	104	149	514	202	111	267	324	433	638	252	592
TPD52L1	-0.339085	4.74358	3.2013	0.0735796	0.739802	904	731	600	267	616	866	1437	673	439	666	1350	683	1068	1638	1678	1125	316	1037	729	549	1012	529	1084	1662	1715	317	548	305	710	375	445	470	491	478	1490	533	451	1321	792	291	627	1213	748	589
SMIM3	0.248038	3.49682	3.20128	0.0735805	0.739802	234	440	350	443	224	133	420	141	189	133	246	162	384	312	350	253	627	447	350	157	159	436	259	299	592	373	263	184	489	315	277	279	245	307	186	155	217	192	364	230	317	333	291	222
ST8SIA1	0.635558	0.421076	3.19809	0.0737244	0.739802	7	28	25	74	14	9	0	8	0	10	17	7	0	31	18	14	54	36	18	30	0	61	3	36	46	155	13	35	69	17	21	31	76	19	0	10	18	26	26	31	53	17	96	62
COX6B2	-0.687039	-1.12516	3.19688	0.0737789	0.739802	51	18	10	1	2	2	4	16	0	7	0	3	0	2	8	16	0	11	8	8	4	7	5	1	4	2	1	5	2	4	8	1	2	42	8	12	2	8	8	2	1	7	2	3
MAPRE2	-0.271313	6.6066	3.19597	0.0738201	0.739802	2639	2978	3240	6303	2941	1531	2039	2288	1740	2119	1932	4709	1953	2999	2756	1707	6832	2965	3496	1706	1492	2373	1658	1836	3111	5364	1371	4309	3384	1860	2498	2558	3115	3448	1750	2480	3706	3690	2087	3726	1884	2942	3709	4377
TMEM9	-0.239692	6.68164	3.19577	0.073829	0.739802	3736	3623	3699	4678	3953	1491	3432	2618	1265	2152	2523	2758	2292	4073	3218	1882	4286	3081	3272	1387	2030	2374	2438	3248	5449	5300	2268	3212	3812	1923	1958	1944	3062	2939	2808	2120	3219	4171	2346	2818	2327	3903	3142	4445
SNTB2	0.15412	4.41156	3.19533	0.0738487	0.739802	668	528	368	423	452	624	779	488	541	477	529	406	470	504	828	468	521	442	617	520	689	450	573	580	585	331	465	469	600	449	357	385	299	518	580	520	394	677	645	434	288	588	483	478
RASGRF1	-0.633542	3.62165	3.19498	0.0738648	0.739802	72	115	239	391	262	40	126	107	243	103	42	319	82	283	213	56	214	203	137	180	27	132	96	33	91	203	60	649	383	80	146	96	319	182	29	143	290	107	69	81	110	186	211	370
CHD2	0.143058	7.02214	3.19394	0.0739118	0.739802	2534	3878	3143	3675	3097	2530	3570	3234	2408	2503	3023	2785	2796	3310	3796	1989	4157	4220	4284	2084	2461	2120	2068	3146	4455	4120	3244	3701	4202	2898	2801	3696	3504	3995	3633	3105	3491	3592	3266	3009	2967	3383	3438	4083
RAB30	-0.25819	4.39655	3.1933	0.0739408	0.739802	493	552	680	1505	1020	397	375	453	458	305	293	1450	495	555	801	280	1323	436	662	265	218	419	315	303	578	1385	358	741	760	368	498	435	581	666	217	428	582	610	375	909	674	645	731	1010
SLITRK2	-0.688476	-0.599824	3.19329	0.073941	0.739802	12	1	0	18	4	36	4	0	30	18	39	3	8	10	27	2	1	18	20	23	80	2	26	11	15	23	0	9	27	4	47	8	4	20	6	13	10	37	20	21	50	13	0	26
OTUD4	0.171481	5.44922	3.19252	0.0739761	0.739802	672	1002	644	1392	1222	817	1028	1002	718	857	979	1026	699	1205	1002	744	1437	767	1107	822	882	574	736	824	559	578	823	879	1170	1009	780	1162	928	1014	862	797	993	928	831	1319	836	864	1210	1121
WBP2NL	-0.327195	2.83869	3.1921	0.0739948	0.739802	118	179	163	198	180	75	101	148	89	139	85	271	106	162	122	93	260	128	148	101	40	110	66	49	137	220	103	328	223	98	180	142	242	220	112	116	188	116	130	144	100	193	195	229
CLRN3	-0.935759	-0.504202	3.18866	0.0741509	0.740458	57	78	20	5	12	17	57	18	10	17	6	0	0	14	4	0	0	0	25	27	0	7	0	11	4	2	0	3	37	0	5	1	26	133	11	55	2	136	0	10	18	6	25	0
TBC1D5	-0.136389	5.40847	3.18766	0.074196	0.740458	847	1181	849	1383	1224	802	1195	1085	1043	851	960	1448	721	1198	1229	758	1165	1125	1359	663	649	797	747	1026	953	1037	677	1226	1322	663	823	922	906	1034	926	1028	1217	968	948	1050	750	1368	1331	1371
KIRREL1	0.30701	4.66492	3.18745	0.0742055	0.740458	952	668	323	338	211	442	542	508	280	391	474	379	377	247	347	392	547	775	563	229	294	272	428	491	527	358	467	415	833	543	556	565	474	752	586	614	244	690	688	561	584	390	590	537
TYRP1	0.520366	1.22798	3.18603	0.0742704	0.740477	45	113	87	162	56	8	19	19	1	2	18	70	73	61	17	14	135	56	79	19	11	38	34	21	184	120	34	11	40	24	27	35	52	30	26	33	71	37	29	118	177	69	153	248
WSB1	-0.167979	6.95045	3.18528	0.0743043	0.740477	2106	3057	2612	4927	3857	2373	4093	3882	2212	2131	2340	2601	2050	3226	3346	2109	4606	5413	3899	2482	2524	2950	2600	3560	3993	4100	2941	3945	5035	2832	3812	3752	4206	4016	2615	2151	3591	3176	2756	3185	3085	2643	2474	3410
BNIP2	0.151259	5.07472	3.18344	0.0743881	0.740808	919	698	704	712	794	589	994	1053	685	669	826	679	701	777	1083	741	1068	918	1079	630	772	650	636	967	679	503	671	568	1140	684	778	809	683	1054	825	821	668	1023	706	662	786	765	663	656
SLC7A4	-0.477003	1.39994	3.18242	0.0744343	0.740808	125	106	127	167	111	12	24	48	65	28	23	114	49	79	67	23	159	34	70	33	0	95	41	14	122	262	27	124	138	13	133	41	85	87	4	90	49	114	73	79	31	87	88	126
APPL1	0.12552	5.82517	3.17771	0.0746493	0.742464	1358	1199	1149	1472	1297	1405	1309	1683	1611	1602	1365	1447	1321	1474	2003	1646	1429	1272	1508	939	1127	972	1203	1080	1400	1106	1043	1084	1545	1329	1485	1269	1161	1595	1364	1501	1231	1680	1862	1487	1403	1627	1811	1464
DHRS9	0.583236	3.34873	3.17235	0.0748945	0.744041	402	730	576	272	176	137	628	272	327	130	190	213	246	208	153	64	242	149	634	142	25	127	69	154	62	320	470	45	504	635	149	710	108	656	140	192	30	463	128	185	183	103	667	314
ATP23	-0.260869	1.14189	3.17212	0.0749051	0.744041	38	29	52	43	43	42	36	60	67	54	51	84	33	52	52	61	45	76	76	87	103	56	90	79	43	42	40	25	35	61	5	34	44	37	45	47	37	62	93	39	53	134	41	63
ACVRL1	0.341848	2.86119	3.16833	0.0750794	0.744097	125	252	141	223	256	77	106	75	109	68	103	320	167	138	113	74	222	262	195	83	15	334	59	204	109	324	216	325	156	90	174	182	135	163	57	94	118	111	206	321	126	133	219	183
ACTR3B	-0.201183	2.93196	3.16786	0.0751007	0.744097	177	128	126	264	271	142	164	156	124	204	134	297	165	221	188	130	250	159	203	128	104	145	144	104	164	193	154	252	206	142	181	159	172	263	127	153	213	163	173	192	141	161	218	262
MT1E	0.547463	7.02178	3.16625	0.0751747	0.744097	3445	1452	2086	2305	3989	8331	3450	2331	2469	5868	3747	5241	5028	3093	5372	1826	3707	6053	2999	1501	2938	2684	2671	7071	5210	1500	1218	3160	2553	3210	3118	5574	1753	2777	2302	2859	1090	1622	4738	5639	10150	1987	3185	1420
TLE6	-0.38319	1.24903	3.16623	0.0751756	0.744097	19	97	82	112	75	18	16	43	32	35	25	32	24	91	107	25	72	35	95	49	15	89	19	21	105	68	19	154	133	21	29	15	57	70	22	40	47	26	52	46	74	80	61	111
HPS5	-0.149097	4.31328	3.16584	0.0751937	0.744097	489	662	535	694	445	347	422	514	296	362	412	528	467	583	575	308	769	386	752	300	396	455	337	473	896	821	629	593	616	377	463	615	573	631	439	491	607	542	554	577	398	692	742	839
MRPL19	-0.157633	5.16361	3.16565	0.0752025	0.744097	1268	959	987	1222	1046	1030	1050	994	811	918	1139	1123	970	1044	1282	863	1149	826	1318	692	953	906	879	1009	1062	1057	1001	905	685	402	743	1084	777	952	558	768	826	1386	1106	1071	919	1243	1186	1364
AURKB	-0.838995	-1.3566	3.15731	0.0755875	0.746369	8	0	40	1	0	0	10	13	0	0	3	0	0	14	46	0	9	66	1	22	1	3	14	18	12	16	2	21	58	16	2	5	16	4	5	1	28	17	2	1	3	40	0	14
NUAK1	0.169911	4.40662	3.15606	0.0756454	0.746369	375	619	626	992	550	330	370	526	558	312	401	705	339	396	476	524	1217	531	472	302	288	299	317	178	466	553	338	671	607	352	480	428	534	603	461	549	514	558	705	682	374	460	622	678
PDZK1	-0.348256	3.10671	3.15494	0.0756973	0.746369	257	336	404	265	190	131	105	95	124	174	77	283	104	394	262	53	184	94	147	97	41	129	163	70	229	647	156	526	394	105	158	99	448	318	48	168	398	325	175	146	292	174	178	490
TAC1	-0.650864	1.99685	3.15466	0.0757105	0.746369	61	41	33	49	45	261	141	87	147	716	165	171	66	24	42	76	40	42	69	124	83	92	33	45	22	84	66	314	227	77	167	234	62	179	82	361	23	113	42	83	388	194	229	16
NFKBIZ	0.24923	6.59731	3.15439	0.0757232	0.746369	2464	2447	2043	1568	2009	1960	3039	2943	1380	1564	1785	1212	1558	1879	2580	1460	2013	2291	3408	1718	3016	1301	2415	2990	4042	985	2940	733	3101	2930	2025	2335	1824	2673	3259	1794	1603	3107	2189	1120	1528	2334	1246	2035
KRT6B	-0.549903	2.51497	3.15393	0.0757445	0.746369	174	537	51	19	54	144	268	109	97	22	183	77	42	132	335	78	142	63	109	42	485	81	242	95	295	9	55	7	72	232	101	27	91	206	97	594	72	254	80	37	75	176	33	98
RDH13	-0.269518	3.56422	3.15234	0.0758183	0.746369	238	247	239	372	366	243	264	227	187	189	140	191	123	205	206	207	362	320	291	148	237	254	271	228	341	235	202	396	438	201	345	258	263	421	187	174	266	263	150	206	149	175	224	434
OR13A1	-0.683122	-0.409008	3.15225	0.0758225	0.746369	5	8	16	28	47	6	9	12	0	3	5	88	5	29	29	0	24	10	18	0	0	10	2	0	35	99	5	47	16	24	18	18	19	19	7	16	38	21	17	17	1	29	28	24
SCMH1	0.158555	4.97674	3.1503	0.0759129	0.746778	1235	1254	545	696	754	635	574	551	553	476	649	683	734	564	679	700	795	799	741	545	551	640	492	630	1214	1131	644	624	688	675	651	660	588	575	574	627	637	674	672	863	532	791	754	798
TMEM272	-0.519545	-1.64988	3.14632	0.0760984	0.74757	3	4	11	7	9	1	3	10	0	5	9	9	0	2	0	1	8	3	7	1	0	9	2	1	4	12	1	25	15	4	8	2	8	20	0	9	19	5	12	2	2	9	27	5
COA5	-0.189679	4.49404	3.14481	0.0761687	0.74757	510	527	830	877	710	406	613	546	367	511	589	586	491	917	864	404	980	551	724	259	530	668	440	710	718	680	438	831	824	406	527	531	726	765	541	522	707	680	495	712	984	709	711	875
PHYHIPL	-0.290693	3.56516	3.14433	0.0761913	0.74757	194	143	294	618	678	153	196	175	180	144	269	571	150	270	264	157	533	382	629	236	214	350	288	256	475	757	167	376	237	120	210	330	293	271	75	307	292	274	365	528	256	445	487	600
CUL2	-0.13344	5.29151	3.14292	0.0762573	0.74757	1199	971	1033	1010	1075	861	1174	1020	1057	948	1098	988	894	1062	1362	800	1307	921	1496	681	939	779	778	1312	1310	1217	879	1228	1119	798	778	1023	1058	1068	1136	923	946	1290	1161	1096	1204	1262	1310	1246
SIGLEC10	0.617894	-1.01062	3.1403	0.0763796	0.74757	0	9	29	20	1	4	0	2	0	6	1	0	1	2	16	22	6	7	18	0	0	10	0	4	38	5	29	6	16	10	14	1	11	5	3	7	17	1	13	13	7	22	11	7
HOXB3	0.393884	0.827238	3.13975	0.0764054	0.74757	17	19	80	58	30	25	65	20	57	16	32	5	32	32	70	38	55	74	49	38	8	57	15	39	7	19	13	46	59	97	34	36	68	38	10	16	50	28	44	34	19	37	49	34
ATP5MC3	-0.283642	7.56732	3.13948	0.076418	0.74757	8629	6006	6668	6302	6562	4898	6933	5636	3701	4733	6311	5976	5100	7923	7574	4552	8234	5559	6453	3574	5723	4969	4836	5833	7306	7063	4247	5710	7933	4118	4461	4505	5752	6115	7027	4696	5076	7199	5184	5682	6687	7197	6043	6282
TOB1	-0.44082	7.94637	3.13915	0.0764339	0.74757	13211	10338	7453	5286	6519	8351	12736	8549	7121	8664	3153	10111	6792	12128	6651	6374	7295	4997	13103	7450	7099	6807	8735	10601	12007	10706	4852	10245	11140	5927	4971	4534	4644	8261	14355	10317	9438	6147	6666	6488	3616	10105	11100	9881
CBLIF	-0.770903	-0.634566	3.13835	0.0764711	0.74757	4	2	31	10	15	0	193	2	0	6	17	1	2	32	111	5	17	0	8	0	23	44	0	48	32	3	7	0	46	7	2	7	21	4	37	24	26	32	17	0	6	26	8	4
STRIP2	0.263768	2.26987	3.13812	0.0764821	0.74757	111	86	68	76	82	110	96	114	93	141	97	54	93	61	86	58	168	111	372	109	117	105	143	107	94	77	114	84	121	138	112	329	55	60	82	106	82	90	66	115	43	53	100	128
LIN7B	-0.336859	1.12465	3.13454	0.0766498	0.747997	34	32	20	83	90	26	39	41	33	39	26	105	20	54	32	22	74	98	87	33	17	37	56	28	39	82	28	92	65	35	43	49	67	63	14	18	53	41	38	64	30	53	52	76
HEATR5A	-0.131432	5.28982	3.13443	0.0766551	0.747997	953	1379	802	1247	888	934	1119	1081	746	966	975	1122	779	1060	1196	873	1268	1087	1413	658	960	802	804	986	1133	1313	786	971	1035	931	874	1080	871	1208	1182	1229	1081	1338	1039	1238	1180	1115	1469	1265
PHLDB2	-0.173435	6.82664	3.13276	0.0767339	0.747997	3154	2825	2392	2863	2483	2590	2639	3600	2899	2715	2775	2650	2117	2278	3259	2425	2346	2974	2845	2056	4210	2184	3018	2452	2870	2982	2365	3125	3512	2563	2599	2662	3012	4710	3602	4388	3174	3488	3662	3544	3402	3701	3101	3343
SH3PXD2B	0.351208	4.88074	3.1323	0.0767556	0.747997	620	566	442	405	339	485	649	348	502	465	720	474	319	389	544	628	465	633	503	461	783	321	373	639	383	256	579	225	719	436	505	408	256	477	638	611	378	555	632	342	324	423	401	337
APOLD1	0.298013	1.60119	3.13119	0.0768077	0.747997	87	90	99	87	81	31	75	19	35	68	47	206	60	99	65	46	167	33	81	51	14	59	12	40	35	67	69	82	86	36	72	48	39	64	39	67	39	45	34	106	131	92	102	66
IL4I1	0.478987	1.06093	3.13032	0.0768485	0.747997	25	47	16	38	32	19	16	25	21	16	21	24	12	20	45	20	43	31	53	16	18	27	24	20	36	34	17	16	12	19	33	52	31	25	17	13	25	33	17	33	11	24	27	18
PLGLB2	0.305323	0.204106	3.12991	0.0768681	0.747997	27	16	14	25	26	26	17	25	16	28	7	12	25	16	45	18	30	14	29	14	4	28	4	22	7	26	37	45	39	20	22	22	40	28	17	13	34	15	15	18	24	11	17	32
NECAB2	0.528873	1.52242	3.12676	0.0770165	0.748964	36	38	55	67	78	13	18	52	7	67	7	41	17	57	15	31	92	45	37	29	18	45	31	7	28	91	21	104	54	9	63	25	71	56	1	31	88	23	17	31	28	32	57	90
UGT1A6	-0.586453	1.74841	3.12515	0.0770928	0.749024	265	125	266	36	40	49	109	29	17	4	54	33	22	448	56	20	57	89	74	61	156	53	172	222	445	63	83	20	313	19	6	16	48	92	183	40	75	129	41	5	42	77	49	71
PRRX2	0.746789	-1.94712	3.12437	0.0771299	0.749024	2	5	8	9	2	0	8	0	9	0	3	0	0	7	3	8	14	12	0	0	3	4	15	0	7	4	1	0	6	3	0	11	1	5	0	0	0	1	0	0	0	1	4	4
TMEM156	-0.527014	-1.16701	3.12353	0.0771695	0.749024	12	19	5	14	2	7	6	18	14	25	11	11	0	24	0	0	21	35	12	6	12	14	2	25	6	7	7	9	9	29	6	1	2	6	0	10	5	11	1	9	11	20	14	16
UNC5D	-0.586196	2.62305	3.12106	0.0772864	0.749683	28	58	113	689	410	28	95	165	96	42	86	503	37	253	35	10	239	122	398	53	9	182	60	40	68	337	91	602	261	55	59	166	144	175	7	85	296	112	29	175	72	268	231	428
CDK5	-0.237495	3.90959	3.11419	0.0776132	0.751757	498	543	564	832	508	325	641	490	321	335	502	487	316	610	504	312	791	416	443	298	303	374	407	374	650	654	209	557	524	205	302	327	332	496	400	306	397	527	325	415	254	448	472	543
PGM1	0.281567	6.90794	3.11369	0.077637	0.751757	3468	3520	2014	1510	2777	4537	2829	2759	2432	2933	4487	3558	3618	2741	4164	5354	2066	2549	2419	2105	2196	1932	4066	4377	5812	3029	3043	1890	2190	2708	2797	1831	1745	2124	3092	2534	1710	2408	4187	2417	3100	2379	2546	1303
H2BC5	-0.315711	2.20613	3.11308	0.0776659	0.751757	106	116	94	285	142	70	152	57	58	79	125	300	91	158	183	94	223	31	293	105	90	146	41	78	90	74	88	59	117	109	36	123	95	68	84	112	91	142	100	129	83	110	159	85
C21orf91	-0.186715	4.12722	3.11165	0.0777341	0.751757	358	330	422	677	527	425	422	545	446	424	395	736	376	362	686	344	578	464	850	266	202	308	322	276	341	587	335	635	500	331	481	414	336	627	281	588	579	609	443	669	384	682	628	685
CPT1A	0.295412	4.74287	3.11065	0.0777821	0.751757	1148	1018	821	685	508	310	644	360	242	331	228	263	354	747	395	221	814	427	771	399	482	377	483	370	405	482	221	394	596	413	303	339	360	645	308	412	461	974	465	466	272	489	364	850
RFESD	-0.34375	1.42666	3.11037	0.0777951	0.751757	49	93	52	84	83	75	59	105	42	81	101	87	57	113	139	73	89	70	103	44	81	105	43	88	80	70	67	106	131	48	61	108	73	72	57	81	113	62	89	84	150	116	114	64
MRPS15	-0.222269	5.34474	3.10616	0.0779969	0.752733	1495	995	849	1362	1408	1025	1051	862	714	922	1614	1549	933	1242	1211	1317	1048	1616	1602	877	1781	1271	1320	1321	1404	1238	1108	797	807	578	794	1184	783	1023	691	655	659	1593	1558	1433	1214	1917	1153	1218
AKR1B15	-0.564891	2.65113	3.10563	0.0780222	0.752733	400	230	178	44	55	258	706	67	48	54	87	109	68	603	179	139	66	50	195	165	161	143	130	511	200	47	116	90	869	89	81	29	179	127	576	121	121	369	93	19	57	214	29	1383
TRIM44	0.104981	6.78516	3.10469	0.0780673	0.752733	2619	2034	2840	3372	3450	2866	3406	2946	2396	2490	2904	3259	2613	3089	3830	2313	3831	1947	3510	1820	2291	1773	1858	2614	2105	2143	2315	2161	3018	2004	2125	2452	2141	2699	2861	2868	2447	2928	2485	2911	1712	2799	2474	3040
ZNF441	-0.301252	4.23183	3.10415	0.0780929	0.752733	211	374	509	1015	627	377	325	580	485	495	298	637	371	777	649	258	708	461	780	305	194	411	203	346	347	972	314	1143	678	374	439	552	657	713	161	559	933	685	541	859	596	538	931	908
TBCCD1	0.235596	3.28635	3.09979	0.0783024	0.754123	592	390	175	306	255	216	172	225	110	122	149	212	149	167	160	186	299	250	593	128	175	108	224	183	390	425	234	211	275	219	203	237	313	259	76	194	259	222	186	200	100	256	215	349
AP1S3	-0.203241	4.34397	3.0991	0.0783357	0.754123	925	738	375	602	649	688	710	749	386	725	770	686	490	514	585	547	530	393	870	460	600	407	592	602	577	569	483	306	465	398	350	673	399	727	391	559	377	774	516	576	483	445	877	552
TCAF2	-0.404608	4.72799	3.09654	0.0784589	0.754374	1016	683	834	2316	1641	239	498	488	224	534	235	955	454	921	592	193	1602	460	1302	238	90	310	151	434	769	2005	280	864	982	253	495	480	605	1082	86	529	1312	732	403	1490	542	637	616	1852
EML1	0.196869	3.34909	3.09651	0.0784605	0.754374	183	216	245	243	212	141	257	174	114	208	191	193	255	218	230	184	360	256	340	88	190	213	153	348	203	210	214	281	338	235	253	237	180	243	224	206	136	263	284	293	113	281	385	202
CMBL	-0.292525	3.67365	3.09522	0.0785226	0.754497	331	219	241	463	183	171	242	230	180	217	154	370	150	403	278	126	307	303	384	276	147	252	207	289	302	406	97	642	502	142	207	157	420	451	187	254	397	392	161	246	197	455	353	397
MSX1	0.339315	0.431342	3.08979	0.078785	0.756311	21	40	36	62	39	14	22	25	26	3	31	33	30	18	30	24	62	26	63	15	13	52	17	16	24	62	20	32	36	36	58	50	30	41	3	4	29	19	32	42	22	41	34	31
NPC1L1	-0.474863	3.32197	3.08787	0.0788778	0.756311	128	382	233	347	234	108	143	184	115	139	70	207	149	268	129	27	346	175	351	161	25	153	117	43	130	236	98	420	231	55	243	137	322	454	12	165	233	170	71	182	92	111	200	191
ADAMDEC1	0.444136	2.60387	3.08772	0.0788851	0.756311	130	266	255	205	80	55	139	74	65	28	40	58	180	144	422	171	174	145	196	76	24	128	56	95	439	287	146	95	338	127	201	202	138	201	74	40	169	90	233	109	362	245	179	183
OXR1	-0.158385	4.98581	3.08723	0.0789091	0.756311	616	702	894	1273	876	614	952	916	447	538	685	941	783	1208	1237	668	1565	801	973	530	610	551	528	812	751	911	535	1062	995	481	646	694	685	1023	557	896	1018	948	737	944	1263	845	1108	1137
SFXN1	-0.163215	5.44976	3.0844	0.0790463	0.756814	1540	1495	1087	1567	1576	866	1237	881	750	886	775	1294	916	1615	1255	743	1991	1243	2363	1068	893	976	1008	1229	1715	2210	842	1264	1370	790	968	1266	1158	1038	935	1004	1277	1343	993	1288	1121	1243	1399	961
ST8SIA5	-0.543038	0.316664	3.08411	0.0790605	0.756814	20	4	12	50	31	4	22	23	14	18	16	12	12	28	14	15	31	28	12	14	8	46	20	1	17	44	7	60	21	2	13	13	72	48	8	26	22	24	22	22	14	29	31	78
TAF1A	-0.257433	3.04186	3.07715	0.0793997	0.758668	246	197	232	320	231	212	236	337	211	275	234	221	232	180	257	175	471	261	324	114	134	217	132	185	154	272	316	250	175	257	216	343	188	318	181	296	263	159	254	323	252	181	394	251
CRYL1	-0.192197	4.05587	3.07656	0.0794282	0.758668	424	371	520	745	403	238	325	337	195	293	297	343	304	578	485	328	511	621	628	312	355	381	366	420	463	676	163	574	572	121	307	348	489	471	180	270	404	383	411	554	360	596	385	851
BIRC6	0.123369	6.61786	3.07572	0.0794694	0.758668	1359	1675	2215	3213	2805	2135	2906	2595	2050	1948	2242	2445	1893	3163	3169	1496	3307	2120	3166	1705	1756	1571	1645	2222	2101	1848	1862	2946	3044	1759	2181	2632	2556	2559	2144	2378	2864	2646	2518	2572	2298	2894	2625	3306
TMEM187	-0.342019	2.2526	3.0728	0.0796123	0.758668	84	41	55	205	175	81	73	39	52	67	79	114	85	42	52	158	63	284	273	86	156	187	319	113	199	128	68	88	41	20	63	110	46	55	37	33	55	168	152	168	103	216	120	173
ICA1	-0.219916	6.32412	3.07242	0.0796306	0.758668	2203	2615	2041	3060	3091	2228	2111	2235	2085	2471	2789	3796	2257	2831	2567	1905	2689	1941	2902	1476	1679	2005	2055	1907	2750	3177	1741	2747	2673	1688	1907	1781	2188	2275	2290	1891	1807	2580	2120	2466	2029	2341	2873	2986
GYG2	-0.339901	2.76168	3.07191	0.0796556	0.758668	279	332	120	242	152	58	289	132	33	46	76	120	123	275	221	49	241	74	149	106	95	110	167	124	252	239	66	215	216	25	154	111	262	104	137	128	288	95	74	128	109	171	199	183
B3GALT2	-0.378057	1.89039	3.07035	0.0797322	0.758668	98	64	131	185	113	101	32	96	109	63	35	174	21	120	103	45	211	37	99	107	26	125	38	81	76	127	33	186	232	64	47	79	89	91	14	46	127	127	33	92	55	87	182	172
FN1	0.588645	6.83915	3.06747	0.0798736	0.758668	862	1353	7878	1306	1008	746	1977	643	748	405	596	743	452	3184	4255	369	1471	4404	932	1225	1033	1036	1647	2265	1477	1200	1081	2157	12054	1088	949	459	1533	1078	414	452	2590	973	1216	695	1468	5154	638	2384
GLT1D1	0.534397	1.06155	3.0665	0.0799212	0.758668	33	39	68	86	46	4	16	17	11	40	22	17	10	62	11	6	65	38	74	53	4	41	17	7	17	102	6	133	102	15	13	54	74	15	1	27	34	2	11	57	45	38	118	96
KRT222	-0.466294	3.72318	3.0661	0.0799409	0.758668	232	370	575	1182	909	102	217	326	248	185	278	879	279	410	670	179	1110	315	499	184	93	277	200	99	360	621	135	814	585	142	256	211	420	534	67	312	482	429	225	628	562	378	452	1019
PDIK1L	-0.185672	4.27589	3.06591	0.0799504	0.758668	584	433	565	713	440	500	606	575	346	407	604	473	598	776	731	414	734	348	590	380	371	502	410	644	670	776	366	671	576	479	428	438	434	531	548	395	517	571	604	530	584	699	710	728
PDHX	-0.193668	5.1419	3.06497	0.0799966	0.758668	1708	1227	848	944	1012	834	923	789	483	755	857	933	866	1566	1080	731	894	948	1458	503	929	1001	816	1252	1487	1413	788	1008	1116	920	912	1139	862	944	1032	964	1020	1035	825	1225	967	1208	1198	1360
PDK3	0.313271	5.69058	3.06368	0.0800601	0.758668	1008	964	1603	2149	2352	538	1148	906	534	847	646	1453	891	1935	1191	499	1453	493	2297	863	259	1251	634	816	826	1932	524	1663	1819	624	919	1703	2624	888	255	679	1735	473	755	1217	1536	735	1606	2959
GNAS	-0.316396	10.9795	3.06333	0.0800775	0.758668	29947	29408	76928	103223	80472	18594	40097	40225	31133	34510	23666	97704	30385	79069	79265	21214	65075	42076	56770	29513	16360	34386	21496	22476	24404	43689	19417	92678	78530	22320	36157	31791	62022	65620	13215	45184	76575	56730	33920	62286	36931	64144	69834	92466
FNDC4	0.325545	4.60467	3.06324	0.0800817	0.758668	747	530	402	198	341	536	501	560	273	355	756	281	807	665	933	768	263	404	317	176	454	258	592	746	649	147	429	279	574	546	354	361	124	548	1051	503	223	732	458	262	512	700	243	328
SMG1	0.194827	6.10273	3.06214	0.0801358	0.758668	953	1150	1002	1427	1539	1484	1610	1739	1679	1427	1578	1116	1207	1273	1489	1173	1834	1233	1986	1059	1338	935	1037	1388	888	996	1260	1210	1609	1460	1267	1871	1222	1925	1603	1657	1294	1606	1688	1872	1304	1421	1429	1723
MSLN	-1.29858	-0.0482654	3.06189	0.0801483	0.758668	27	34	0	0	1	5	40	10	0	0	1	0	6	3	5	0	0	0	20	14	0	0	0	0	0	2	0	0	8	0	0	4	1	6	2	9	1	26	0	1	0	0	7	0
MAP3K4	0.17309	4.2625	3.06129	0.0801778	0.758668	311	413	382	635	512	345	451	367	234	417	355	362	321	499	519	371	657	425	550	175	214	317	276	314	285	448	388	466	676	369	386	476	462	518	312	462	432	346	378	605	378	427	602	593
NFXL1	-0.156492	3.35686	3.06013	0.0802355	0.758668	241	144	223	250	248	231	263	254	392	219	286	262	203	337	268	205	277	294	275	181	235	296	224	291	192	224	274	222	248	187	170	254	240	278	175	282	224	295	281	314	312	289	233	275
LRRK1	0.272173	3.36587	3.05991	0.0802461	0.758668	283	280	167	129	202	237	245	221	103	204	286	165	267	160	222	280	178	243	245	146	218	181	212	192	387	125	200	125	157	232	219	198	135	236	252	194	148	274	283	181	119	211	131	118
VPS37A	-0.203638	5.34064	3.05594	0.0804424	0.760054	650	880	937	1303	1152	592	935	797	659	895	671	1347	607	1130	1004	484	1443	973	1367	645	536	735	616	651	833	1966	689	1636	1474	565	818	959	1312	1056	434	1089	1318	1071	1016	1548	1095	1000	1652	1689
CPQ	-0.241701	5.31277	3.05413	0.080532	0.760431	1127	1560	1131	2249	1097	615	836	797	315	640	671	1076	501	1552	1292	613	1393	851	1063	563	448	904	814	892	1860	2386	487	1890	1799	539	734	704	1468	1355	476	844	1672	996	932	1000	938	1309	1100	2039
DYNC1I2	-0.157936	6.86439	3.05292	0.0805919	0.760527	3660	4148	3077	3294	2701	2752	3819	2704	2547	2881	4184	3364	3084	3140	4567	2903	4037	2560	4081	2049	3648	2685	3026	3225	3430	3311	2977	2402	3448	2573	3029	2433	2579	3540	3853	3508	2812	3492	2766	3232	4585	3722	3540	2956
FICD	-0.329129	5.48593	3.05065	0.080705	0.76074	1433	1054	1224	2544	1541	838	850	1203	855	1085	1147	2493	1000	1230	1172	703	4331	836	1809	679	665	1045	616	800	1233	3274	1057	1218	1253	987	1427	1726	1181	1566	674	1539	1187	1300	975	2504	1094	1260	1773	1727
IVNS1ABP	-0.157704	6.67018	3.05047	0.080714	0.76074	2780	3117	2791	2524	1965	2865	3636	3122	1953	1870	2694	2223	2775	3297	3940	2364	2294	4004	2731	1392	1999	2004	2182	4249	4513	2711	2504	2170	2638	1861	1889	2064	1988	2009	3817	2336	2561	2809	2595	2882	2940	2515	2812	2563
PCDHB12	0.376178	1.06638	3.0487	0.0808019	0.7611	6	30	31	129	59	29	31	23	50	22	32	69	16	33	31	41	99	67	62	25	22	69	3	18	29	29	16	25	35	14	28	53	39	40	9	40	57	45	38	49	49	53	52	73
ZSWIM6	0.204554	4.19696	3.04507	0.0809828	0.761373	421	303	390	341	366	426	627	531	457	351	471	401	411	558	565	430	444	471	632	273	462	251	364	653	210	142	377	192	428	375	361	407	279	558	471	412	299	420	465	337	304	327	285	355
TDRD6	0.38792	0.574947	3.0434	0.0810661	0.761373	13	20	30	69	89	10	10	34	22	35	14	21	16	66	40	27	43	26	45	35	7	41	13	15	16	32	13	44	37	24	43	19	34	19	13	18	59	17	26	28	20	24	22	92
TTBK1	0.732015	0.465523	3.04303	0.0810846	0.761373	1	12	20	24	8	0	3	20	0	0	4	6	5	4	7	5	15	14	19	2	0	12	3	1	12	26	4	31	17	17	30	5	8	13	0	11	17	3	21	22	6	19	6	54
NKD1	0.47006	2.1389	3.0396	0.081256	0.761373	25	95	108	72	35	29	71	51	46	43	77	105	43	55	70	23	218	154	92	31	28	117	47	111	66	61	22	99	206	80	86	25	76	91	3	38	137	77	93	38	63	106	100	82
RAPGEF2	0.191693	5.31507	3.03906	0.0812829	0.761373	1092	717	878	808	736	1019	1156	1057	800	1004	853	938	888	651	1363	763	946	768	1083	735	1034	506	855	795	550	393	858	585	881	882	688	1007	525	1053	888	1058	684	1055	1186	842	789	738	1011	907
C4orf45	0.610179	-1.51189	3.03857	0.0813075	0.761373	8	5	3	47	10	10	3	8	6	5	1	8	3	12	1	0	19	14	11	9	1	10	3	10	11	7	9	3	7	15	16	14	4	6	2	7	0	3	3	8	0	6	3	17
XRCC2	-0.365303	-0.354149	3.03849	0.0813117	0.761373	21	53	34	5	25	8	17	38	23	11	3	1	44	16	12	14	34	34	40	21	0	26	21	21	20	22	22	48	19	17	10	22	36	16	8	15	15	26	21	8	22	29	11	37
TFAP2C	-0.442913	0.271445	3.03609	0.0814321	0.761373	41	31	14	12	17	31	68	31	30	20	44	72	15	98	40	10	27	25	40	101	103	54	9	21	28	10	16	17	52	7	16	8	4	41	38	63	68	39	28	9	6	60	36	38
DNAJB4	-0.312951	5.60799	3.0342	0.0815267	0.761373	1733	1445	1694	1131	1121	1617	2030	1892	1111	1728	1653	1494	1515	2475	2429	1311	1383	1047	1776	939	1388	1424	931	2804	1610	1049	1436	1192	1565	1456	1122	1120	1192	1186	2378	1471	1230	1642	1142	1190	1891	1822	1450	1248
ACRBP	-0.45612	0.837591	3.03412	0.0815306	0.761373	15	38	20	92	70	20	60	23	8	5	26	53	19	27	50	17	51	47	37	43	6	24	21	8	120	125	0	269	73	20	36	21	54	108	14	43	70	44	21	36	4	61	36	96
MYSM1	0.118922	4.93331	3.0339	0.0815417	0.761373	444	654	656	982	912	630	674	881	772	759	668	851	523	1080	857	624	1115	869	1016	492	532	525	542	879	512	562	541	696	917	579	697	708	671	938	631	763	895	693	654	733	607	735	784	952
CFHR1	-0.497002	-0.794548	3.03259	0.0816075	0.761373	8	13	29	8	11	8	17	7	1	4	6	9	21	59	36	7	14	5	8	12	23	4	6	20	9	3	5	13	12	3	9	5	3	9	18	8	8	20	11	4	13	25	11	17
MAGEH1	-0.272891	5.24193	3.03253	0.0816109	0.761373	1016	1188	1205	2055	1539	534	752	887	655	811	902	1617	935	1246	1182	702	2231	808	1339	467	449	1059	685	852	1103	2344	672	1838	1241	699	986	845	1298	1323	756	929	1072	1279	929	1302	1260	1273	1410	1486
NR1H4	-0.569543	2.18039	3.03243	0.0816158	0.761373	136	118	150	34	74	77	128	200	27	62	20	6	133	430	259	62	17	58	81	42	109	18	99	394	159	15	20	53	175	32	47	39	68	92	147	66	73	252	44	1	116	197	20	122
GGTLC1	-0.510755	-1.42332	3.03179	0.0816481	0.761373	12	6	12	1	2	10	20	8	2	1	6	3	8	12	16	20	4	10	2	5	8	2	14	20	14	0	5	3	12	5	7	2	5	8	19	8	5	16	12	4	8	10	3	8
PIP4P2	-0.222451	3.70983	3.03116	0.0816797	0.761373	333	255	272	612	372	126	269	327	159	215	195	535	176	445	366	205	524	498	522	206	247	280	298	267	367	519	124	398	478	185	222	249	432	372	172	284	329	451	365	529	334	557	480	642
KIRREL3	-0.604862	2.55865	3.03052	0.0817119	0.761373	92	67	81	194	241	22	61	74	42	65	37	363	49	108	118	28	108	114	136	18	20	70	33	47	45	85	18	253	116	59	128	63	187	112	12	62	103	139	68	222	68	138	155	139
ABCB1	-0.236264	5.30403	3.02903	0.0817869	0.761373	1234	1394	1696	1719	997	759	1059	1163	748	849	542	1316	820	1255	918	372	1247	630	1639	812	721	629	1072	516	1291	2092	534	1261	1379	740	584	1334	1306	1351	679	676	1376	1405	832	1082	1851	1127	2478	1678
NPAS2	0.278466	4.58749	3.02825	0.0818264	0.761373	481	491	372	428	638	355	680	476	318	384	436	575	368	680	487	372	605	570	428	438	449	301	462	505	363	241	339	420	486	271	382	313	414	347	312	286	254	500	516	402	333	465	383	541
CMTM1	0.285743	-0.689594	3.02732	0.0818731	0.761373	18	15	15	7	13	14	13	9	2	13	6	11	14	7	13	10	13	14	17	10	11	9	8	11	14	16	7	5	6	19	5	9	12	17	13	6	8	23	9	8	14	17	16	8
GALK2	-0.2319	4.99966	3.02726	0.0818761	0.761373	1024	1062	1145	1529	975	790	1162	805	655	902	954	1020	759	1417	936	547	1411	900	1459	597	634	886	812	971	958	1404	900	958	969	572	741	823	1042	908	849	783	1050	760	681	941	912	1114	1047	1225
A2M	0.303128	4.85497	3.02293	0.0820953	0.762398	516	1934	714	1160	582	303	511	631	206	230	427	656	732	368	893	982	1681	795	475	280	442	411	413	1022	1492	1559	265	1080	1082	954	1039	809	412	402	265	348	750	537	774	699	796	741	592	599
NARS2	-0.19623	3.97148	3.02122	0.0821818	0.762398	259	226	334	411	352	190	422	508	405	385	286	473	555	613	211	354	530	397	664	347	347	198	378	648	411	539	435	288	705	460	366	329	439	381	532	511	357	451	523	271	350	316	648	628
CAP2	-0.3131	3.1296	3.02077	0.0822047	0.762398	393	308	377	212	113	121	524	308	43	287	362	277	209	265	420	229	114	239	263	279	259	192	346	363	378	135	253	265	273	181	232	214	232	350	396	346	178	429	220	178	172	376	249	149
NPTX2	-0.430199	5.93899	3.01956	0.0822658	0.762398	969	348	740	2652	1345	444	807	1283	606	978	516	2064	885	1633	1352	793	2241	2096	806	676	358	899	581	357	469	889	366	1746	1300	579	1541	551	889	1883	313	1169	995	1680	721	1768	478	1003	1041	2509
SLC9B1	-0.224146	3.2166	3.01954	0.0822667	0.762398	273	231	323	376	327	193	323	245	189	212	258	345	237	317	292	180	456	270	360	149	199	269	223	272	242	361	190	301	308	134	171	258	307	365	205	185	243	321	239	300	378	319	271	309
PDP1	-0.274082	5.69286	3.01917	0.0822854	0.762398	1792	1794	934	633	623	1001	1783	1584	944	1445	1747	969	945	1367	1782	942	678	1296	1103	972	2519	767	1617	1523	1480	516	935	632	1224	1198	970	1091	969	1720	2691	1514	872	2214	1457	1050	1177	1476	935	1290
SAPCD2	-0.517549	-0.414082	3.01764	0.0823632	0.762657	12	18	21	18	12	4	1	6	3	12	6	20	12	7	15	12	9	16	22	11	8	8	6	1	14	8	9	26	11	1	18	12	29	8	1	6	11	10	9	10	15	10	11	10
FUT1	-0.319745	2.42138	3.01281	0.0826091	0.762882	234	242	84	70	102	187	146	102	168	149	119	115	62	154	111	165	70	141	109	128	197	59	168	89	120	62	79	89	93	130	79	68	59	91	150	169	59	47	119	55	48	59	133	125
ABCB10	0.156668	3.98194	3.01278	0.0826104	0.762882	422	230	378	304	309	447	537	367	380	460	335	321	354	564	505	274	469	243	499	407	475	283	351	479	259	318	274	227	427	291	228	371	318	428	389	461	356	394	405	362	379	303	413	278
CCDC74B	-0.421382	1.06126	3.01259	0.0826201	0.762882	27	35	62	52	23	22	45	70	23	30	23	102	14	32	58	31	27	55	63	31	30	46	53	14	32	87	21	100	128	52	35	36	52	116	12	40	78	52	43	88	32	81	98	90
PFKFB4	-0.38511	3.43066	3.01241	0.0826296	0.762882	350	357	262	179	153	115	333	129	155	115	196	97	138	328	306	152	269	161	180	92	72	145	74	569	1601	319	145	155	271	112	161	164	214	245	109	156	95	188	125	141	568	169	153	222
ARHGAP21	0.21674	5.8447	3.01165	0.082668	0.762882	1567	899	859	1106	1052	1359	1569	1481	981	1385	1428	1059	1177	1193	1386	946	1117	1184	1530	971	1436	746	1017	1679	1183	405	1090	698	1337	1138	973	1219	902	1395	1302	1544	946	1682	1363	1171	1187	1314	1195	1046
PCNX1	0.22111	5.01073	3.01047	0.0827281	0.762882	410	566	818	959	569	495	698	794	612	599	588	659	661	840	821	468	894	664	968	523	358	451	437	540	383	614	430	637	801	449	471	732	519	609	432	653	671	581	619	858	646	677	844	948
SMDT1	-0.284165	5.95307	3.00951	0.0827771	0.762882	1738	1560	1990	3154	2558	1205	1682	1293	1017	1435	1607	2350	1370	2043	1844	1235	3078	2190	2981	1229	1253	2072	1718	1428	1991	2877	1188	2107	2011	948	1352	1832	2120	1853	1051	1400	1756	1878	1921	2340	1765	2782	2636	2539
DNAJC10	-0.131643	6.97968	3.00822	0.082843	0.762882	2351	2597	2227	4240	3908	2582	2978	3100	2352	2958	3128	4307	2663	3135	3502	2543	3960	3200	4357	2526	2823	2510	3484	3260	2997	3664	2513	2772	2472	1883	2379	2955	2319	2875	2577	2982	2418	4027	3732	4620	4007	4787	3875	3955
RGS16	-0.522767	5.29438	3.00609	0.0829523	0.762882	775	1051	1042	2202	2712	246	468	662	305	597	431	10264	432	1255	449	467	3022	1149	1420	279	429	733	265	307	1226	3904	316	860	706	593	743	805	1192	1196	148	921	1083	4089	805	2910	684	1094	1097	3514
PRPS1	-0.185253	4.95069	3.00603	0.0829555	0.762882	875	643	986	1305	1066	739	590	684	764	799	796	1383	643	920	991	503	1208	720	1121	386	454	736	492	446	651	1001	670	1284	899	605	890	807	759	882	492	718	881	748	764	1167	643	711	1212	903
ETV5	-0.187753	4.16666	3.0057	0.0829719	0.762882	522	432	639	723	662	331	408	387	342	511	449	769	470	483	385	278	1005	401	508	235	216	252	227	317	441	825	302	507	556	329	561	456	464	492	192	504	402	670	349	733	271	517	536	727
RNF139	-0.121685	4.65313	3.00543	0.082986	0.762882	569	508	679	781	662	528	628	663	497	505	568	939	514	719	860	566	598	569	706	385	656	482	561	542	615	577	439	619	767	433	482	549	592	612	521	618	671	868	572	653	972	870	699	755
TMEM53	-0.256388	3.72687	3.0034	0.0830902	0.763273	432	542	440	503	595	326	491	339	371	396	488	489	397	503	463	353	512	436	420	221	417	323	408	438	534	471	283	461	396	218	263	325	433	382	330	281	321	422	310	341	281	504	366	372
FAM163A	0.642037	-0.154032	3.00242	0.0831404	0.763273	7	2	16	13	17	1	0	7	3	0	5	1	9	9	10	0	27	14	26	15	2	5	1	7	10	41	8	49	26	23	32	13	44	4	0	2	22	6	10	7	17	22	75	22
UCP3	0.423628	-0.660273	3.00131	0.0831971	0.763273	2	2	13	4	26	3	25	13	0	24	13	11	3	6	1	2	16	7	5	11	1	9	11	2	10	2	12	26	15	6	17	3	14	21	5	6	15	28	9	11	5	11	4	16
MAOA	-0.199977	5.5868	3.00015	0.083257	0.763273	1636	1994	1278	1543	1364	1047	1337	1401	998	986	1499	1040	1132	1932	1399	781	1290	1481	1592	821	1511	1073	1392	1575	1864	1439	711	1622	1626	691	854	776	1392	1481	1308	1295	1685	1876	1024	813	1166	2251	1829	1547
HCN1	0.560555	-0.794319	2.99866	0.0833334	0.763273	11	6	7	7	7	5	28	1	5	24	16	23	0	15	0	0	11	18	10	7	5	4	7	3	1	13	0	8	24	8	3	12	17	5	0	29	11	10	11	5	0	16	19	25
RAP1GDS1	-0.227343	5.89108	2.99697	0.0834202	0.763273	1921	1630	1672	2591	1738	1188	1934	1347	1018	1712	1448	2334	1417	2070	1852	1220	2140	1793	2240	1399	1526	1290	1551	1497	2014	2443	1629	1864	2064	1444	1644	1786	1448	1876	1458	1684	1907	1992	1465	2163	1423	2085	2417	2363
SIRT4	-0.295892	0.58809	2.99606	0.0834674	0.763273	73	39	59	46	27	17	59	41	21	33	43	49	28	50	54	16	54	18	47	20	57	21	35	80	51	12	20	39	47	54	37	42	28	35	71	32	38	35	32	20	61	43	15	36
NAPA	-0.176576	6.91404	2.99423	0.0835615	0.763273	5145	5350	3222	5667	4943	2203	3213	2392	1810	2066	2769	3588	2436	3398	2400	1982	6366	3642	4691	1771	2409	3319	2843	2553	4698	6592	2429	4565	3669	1876	3021	3036	3766	3551	2068	2218	3050	3714	2587	3353	1741	3361	2929	4309
WASHC2C	0.176227	5.04114	2.99248	0.0836518	0.763273	962	697	696	858	728	467	709	605	482	560	670	494	606	825	787	443	1090	849	805	518	635	587	652	669	630	751	475	736	1071	454	632	637	660	770	640	637	834	890	686	701	500	696	634	1112
KRT6C	-0.613665	-0.478979	2.99181	0.0836868	0.763273	17	85	7	1	3	8	24	4	8	3	18	5	2	7	17	8	12	5	12	4	45	5	15	7	44	3	4	1	8	21	10	3	6	20	8	51	3	20	7	3	4	14	2	6
MPI	-0.134051	4.80223	2.99162	0.0836964	0.763273	1146	817	786	987	757	524	615	649	441	498	773	733	560	825	887	536	1001	570	721	379	492	448	467	759	988	706	488	708	770	546	565	600	679	671	651	606	638	765	451	681	661	704	715	713
KCTD15	0.305034	2.70111	2.99115	0.0837209	0.763273	126	77	107	71	120	194	189	104	161	174	189	159	131	90	217	221	113	80	182	164	131	110	128	109	64	45	259	98	129	122	160	105	98	92	90	78	60	112	127	152	88	130	93	53
IL20	0.774672	-1.52122	2.99095	0.0837313	0.763273	8	18	9	49	38	0	8	2	0	0	3	8	0	5	0	0	32	5	15	0	0	15	5	16	15	6	1	15	0	0	0	0	0	6	2	4	3	5	0	4	3	5	3	27
ETS2	0.290461	6.07496	2.99001	0.0837799	0.763273	1158	1122	852	829	1153	1819	1465	1409	1349	1744	1657	1937	1178	1112	1471	1210	1614	1348	1302	1145	1189	741	1008	1526	917	341	1341	514	1463	1653	1279	1297	482	1319	1248	1381	476	1838	1529	1291	1145	1023	1177	806
EPHB2	0.241831	5.81227	2.98896	0.0838342	0.763273	2501	2153	1289	960	950	1339	1344	1474	1321	1378	1752	850	1579	795	982	1463	1419	1391	2084	735	828	646	1167	1106	1484	634	1947	637	1027	1622	1517	2117	959	2539	1433	1674	616	1729	1364	1961	904	1082	2173	1119
PGD	-0.230775	7.01947	2.98801	0.0838832	0.763273	10011	6224	3882	2210	3168	4493	3692	2743	2551	2291	4719	3665	3894	4089	2786	2908	5374	2619	5205	2355	4320	3999	2114	5315	7800	4495	3286	2760	5188	2536	2680	3100	3749	3511	5566	3794	2470	4534	2425	3597	2520	5268	3770	3536
BLMH	-0.132378	4.72343	2.98624	0.0839748	0.763273	775	785	660	913	682	649	594	532	685	661	706	972	538	907	999	507	726	628	999	420	448	611	460	589	730	855	734	846	686	552	622	630	535	668	447	664	755	822	740	884	591	773	863	766
EAF2	-0.38578	2.95953	2.98574	0.0840006	0.763273	160	233	218	390	293	221	350	291	138	229	264	401	293	254	435	219	420	133	418	81	203	221	181	226	265	284	198	154	216	189	176	179	185	288	363	204	185	319	147	280	416	358	239	193
AADAC	0.607927	5.76872	2.98457	0.0840614	0.763273	3209	1314	2383	1261	1902	2312	1133	1647	2291	4637	1371	2072	3837	828	270	850	759	715	928	1386	243	409	1208	900	562	883	1475	326	476	4730	1327	1919	69	677	487	1599	190	809	1498	577	2286	502	1210	2327
ANO5	-0.273191	4.89952	2.98327	0.084129	0.763273	541	588	870	2004	1418	529	772	880	612	651	635	1215	593	1378	1228	395	1908	908	1048	433	498	609	580	724	701	818	501	1191	770	407	576	770	641	1241	526	1354	1322	1039	672	1202	564	922	948	1867
TM7SF3	-0.241852	5.33168	2.98212	0.0841889	0.763273	667	644	902	899	825	735	913	839	555	726	1059	845	896	1208	1195	725	1059	745	746	604	802	634	737	951	792	608	670	875	1322	385	680	509	605	775	950	605	786	857	749	741	714	1155	743	1090
RAB34	0.355237	2.01552	2.98193	0.0841989	0.763273	37	143	117	178	91	13	68	55	49	30	89	66	66	68	102	108	283	155	162	38	7	143	39	89	83	124	69	113	133	66	87	86	113	70	8	44	95	36	290	119	61	84	205	112
BSG	-0.165168	7.9813	2.98181	0.0842052	0.763273	10867	10662	5763	9907	7587	3704	6173	5378	3986	3964	4689	5976	4010	7528	4581	4219	10365	7642	6339	3608	4512	6847	6569	4890	9755	11128	4663	8521	7398	3468	5800	5375	6324	6765	3929	4729	5111	7226	5765	6484	3507	5773	5072	9851
VTN	-0.420657	4.3594	2.98022	0.0842878	0.763273	805	661	573	208	631	609	1110	573	298	257	382	193	523	1126	1272	734	190	345	216	574	773	413	454	1172	1463	398	622	341	923	364	260	236	406	539	2122	258	457	726	632	166	356	1122	483	224
BTC	-0.211161	2.02418	2.97995	0.0843017	0.763273	69	79	87	106	81	45	123	86	50	85	80	75	72	69	129	75	94	80	146	99	136	88	132	78	103	101	66	96	77	60	55	97	138	131	104	87	148	141	146	89	122	159	104	143
HAS3	-0.344645	3.02602	2.97753	0.0844279	0.763273	113	88	130	98	109	109	447	238	185	137	360	94	264	185	329	138	138	134	193	89	168	113	112	93	74	47	229	89	129	97	74	147	75	191	216	298	76	361	146	280	161	271	189	155
RIMKLA	-0.328358	2.68401	2.9772	0.0844451	0.763273	107	67	142	155	111	64	140	69	33	82	59	136	106	176	280	104	194	116	170	90	71	101	91	152	285	124	60	169	220	91	105	91	221	241	87	105	178	123	81	176	152	147	110	143
ATP6V1G2	-0.513867	-0.133835	2.97518	0.0845508	0.763273	10	47	106	61	27	0	9	13	8	13	3	28	3	33	60	8	101	20	46	8	10	21	4	24	36	38	25	81	12	4	1	7	36	41	0	32	22	17	22	6	16	3	58	29
SYTL5	0.458864	1.77108	2.9749	0.0845655	0.763273	74	67	45	234	112	33	80	55	62	19	17	89	76	157	103	38	45	49	38	39	31	94	44	54	104	382	56	49	104	29	9	48	35	18	58	63	61	46	67	45	118	81	131	51
C1orf53	-0.315222	0.246265	2.97477	0.0845723	0.763273	27	10	23	43	26	13	21	18	19	22	34	11	12	17	80	37	42	42	54	37	72	28	33	43	36	24	15	18	31	16	33	30	48	25	9	20	44	35	28	40	33	89	22	31
MRPL16	-0.233881	4.62762	2.97471	0.0845753	0.763273	813	735	608	886	796	758	952	691	669	697	1177	963	818	916	685	713	751	741	965	550	763	674	574	756	704	662	738	586	462	320	758	764	637	607	366	544	493	955	768	873	619	1048	917	725
SLC17A6	-0.595098	4.81252	2.97311	0.0846589	0.763577	692	544	1448	2912	2974	129	580	869	459	192	275	2336	346	630	886	166	1018	385	1204	202	55	270	201	123	1617	2755	277	1359	994	565	820	1267	1023	1323	39	512	869	979	417	1927	736	823	1101	2323
COPA	-0.14336	7.77152	2.97174	0.0847306	0.763773	7798	8989	4856	5721	5927	4815	5280	5255	3264	3864	5318	6299	4471	5079	5004	3514	7127	5186	8138	3545	4276	4275	4371	5881	9695	11770	4594	6585	5777	5161	5441	5989	5860	6346	5915	5269	6424	7720	5219	6996	5006	7810	6992	7565
ANKEF1	-0.142552	3.8539	2.96801	0.0849261	0.764658	311	240	400	577	477	269	365	373	260	374	398	489	388	508	445	220	590	222	435	312	262	353	367	349	235	329	233	411	350	245	234	275	275	310	368	267	352	374	294	374	223	515	360	536
PARD6A	-0.335002	1.53147	2.9672	0.0849686	0.764658	74	52	65	97	94	42	73	41	30	47	77	138	70	129	61	40	61	53	74	55	31	33	55	28	47	45	33	80	79	14	28	36	41	57	34	39	25	57	58	78	43	75	52	72
FAM217B	-0.16283	3.36024	2.96701	0.0849786	0.764658	194	172	313	465	340	220	235	325	198	243	257	371	314	262	369	217	401	277	259	160	218	204	237	245	175	307	146	394	276	227	250	232	250	315	275	287	336	321	224	351	169	342	406	431
LAMA1	0.413551	0.289248	2.96448	0.085112	0.764889	5	20	51	43	64	6	23	16	10	23	9	13	13	17	59	13	85	55	15	9	0	23	21	16	32	1	21	44	89	24	14	28	25	30	4	10	21	29	15	25	38	36	34	23
SUCLA2	-0.284445	6.25353	2.9635	0.0851634	0.764889	1742	1947	2696	2898	2246	1884	2015	2343	1382	2005	2076	2645	1831	3017	2131	1452	3041	2157	2952	1548	1323	2061	2003	1877	2311	3005	1656	3313	3032	1753	1873	1951	2367	2686	1885	2416	2566	2289	2162	2686	3661	2834	3353	3407
CSN3	0.752659	-0.672546	2.96218	0.0852331	0.764889	1	16	29	22	17	6	10	4	2	0	5	8	7	48	5	3	16	11	46	7	4	47	1	17	14	62	2	8	11	16	13	18	39	0	0	3	10	2	28	20	25	5	39	17
SCML2	-0.285935	1.93657	2.96173	0.0852565	0.764889	88	90	118	250	201	66	43	102	70	83	48	149	73	118	97	37	172	92	134	50	46	85	111	83	117	220	74	190	93	59	123	80	103	123	55	103	135	37	94	128	78	86	203	170
OVGP1	0.416618	0.983218	2.96079	0.0853063	0.764889	15	95	88	73	72	18	60	16	16	16	23	38	52	24	26	6	48	67	97	7	17	51	29	48	74	107	6	61	135	14	56	61	101	41	33	44	135	17	27	50	24	24	61	61
ALS2	-0.100011	4.79858	2.95996	0.0853499	0.764889	759	861	719	961	790	572	617	713	439	556	591	653	514	848	735	485	1008	721	1218	476	583	608	456	642	810	823	603	670	967	596	627	836	636	762	564	657	985	868	625	725	522	743	628	957
ASRGL1	-0.216879	3.49537	2.95979	0.0853588	0.764889	266	377	240	459	676	113	661	210	145	96	271	477	266	196	384	109	412	182	346	171	367	147	223	427	207	192	188	218	298	153	242	141	239	245	291	131	191	527	335	373	144	358	224	353
GPI	-0.209158	8.00187	2.95854	0.0854253	0.764889	16045	14552	6892	7884	6958	3410	5712	4265	3157	3862	5177	6019	4379	7939	6794	3335	8547	5379	8177	3865	4309	4566	4037	9090	19549	15765	3553	7961	7786	4205	4833	4825	6871	5486	5017	4793	6754	7233	4843	6456	6837	7456	6759	8906
ANGPTL2	0.378882	4.16547	2.95799	0.0854543	0.764889	118	360	545	719	548	106	311	180	171	158	282	456	205	219	381	214	849	886	813	187	54	649	146	171	247	592	392	691	660	255	384	409	542	652	24	290	539	194	439	643	386	510	660	321
DTL	-0.538931	0.438839	2.95447	0.0856403	0.765596	19	1	83	13	32	2	41	24	19	43	27	30	28	26	6	24	35	91	146	38	64	57	5	46	31	34	25	146	93	101	39	84	34	12	16	23	16	60	52	53	38	55	102	53
TPPP3	-0.337105	4.60324	2.95374	0.0856789	0.765596	1118	1224	543	835	610	164	676	368	170	253	440	619	328	683	477	261	967	754	660	402	322	538	323	295	1049	2301	172	648	891	358	388	579	752	558	340	566	978	589	385	719	657	750	1410	635
ALKAL2	0.269493	2.8436	2.95366	0.0856835	0.765596	160	107	74	164	164	180	156	147	82	115	78	69	162	107	136	263	208	149	130	127	182	228	249	149	122	77	160	121	127	175	129	123	125	248	198	163	125	179	279	158	210	167	138	147
ZNF275	0.193278	3.76515	2.95187	0.085778	0.765629	254	195	335	411	461	257	273	221	251	258	225	287	285	481	365	227	435	446	377	223	225	258	168	198	183	320	183	324	419	184	252	319	266	211	219	209	319	187	278	390	232	311	442	458
CARNMT1	-0.122885	4.00833	2.95031	0.0858608	0.765629	374	347	404	468	492	430	534	531	460	403	401	428	421	459	552	295	497	347	504	312	359	407	267	450	383	385	489	420	473	348	360	438	377	399	435	400	438	470	363	404	421	557	406	530
ZNF578	-0.283746	1.11117	2.95023	0.0858655	0.765629	92	113	63	75	73	67	25	46	13	25	56	27	59	24	67	14	88	57	118	18	67	48	13	94	37	119	35	122	69	48	48	72	75	67	51	41	89	53	21	73	50	79	80	49
TCEAL8	-0.339533	7.12757	2.94934	0.0859125	0.765629	4898	3626	5756	5326	4850	3601	5033	4384	3112	4111	4649	5372	4009	5864	6818	3511	5735	3751	4757	2567	3627	4206	3697	5256	5001	5075	2927	4820	5456	2915	3459	3208	4931	4274	4237	4027	4846	4713	3805	4449	5658	5164	4996	5315
MAN1A1	0.248187	7.42759	2.94887	0.0859374	0.765629	2648	2747	4953	7939	5637	1728	3633	3083	2517	3066	2603	5542	2747	6262	5579	1505	7417	1883	5729	2424	1913	2724	1982	2671	3314	3786	2020	4955	5280	2150	2769	3280	4447	3468	1761	3282	4739	3937	3527	5393	4137	4436	5185	6803
ANTXR1	0.370345	3.81284	2.94759	0.0860058	0.765792	214	227	457	543	198	91	356	204	95	156	169	107	205	223	572	194	695	548	226	150	149	238	167	302	228	234	101	362	1326	207	262	177	288	256	116	141	322	217	364	201	226	596	267	322
PAX9	0.480695	-0.820677	2.94647	0.0860653	0.765876	11	4	6	1	10	24	24	27	19	11	6	28	8	13	11	51	1	15	11	19	24	10	12	6	9	4	5	0	7	14	10	3	8	7	25	11	6	9	8	7	15	9	12	17
BOD1L1	0.152061	6.04628	2.94387	0.086204	0.766066	991	1209	1756	1833	1733	1382	2190	2021	1565	1493	1565	1382	1522	1813	2447	1086	2437	2034	2379	1168	1436	1197	1360	1456	1273	1117	1569	1331	2305	1640	1596	1911	1818	2676	1877	1785	1759	1948	1843	1574	1720	1927	2044	2355
FAM13A	-0.363153	5.20336	2.94341	0.0862287	0.766066	522	734	717	524	688	762	1888	750	610	558	977	737	636	1807	1978	440	601	499	887	544	748	410	637	3407	3773	518	867	554	551	508	562	492	584	569	1119	603	602	732	724	555	3202	847	589	605
GPR61	0.747169	-1.69228	2.94325	0.0862369	0.766066	2	11	12	4	1	0	3	0	4	0	1	1	0	4	5	2	8	12	1	0	0	1	0	0	1	23	1	16	1	0	1	3	18	3	0	3	24	0	1	6	0	4	6	13
ZNF70	-0.207612	1.76113	2.94177	0.0863163	0.766327	77	100	64	107	85	41	94	108	95	77	90	60	82	104	105	60	121	82	90	52	76	35	92	81	99	128	71	75	104	58	57	74	105	55	56	81	89	68	58	61	38	127	64	95
IGSF1	-0.466016	3.77622	2.93659	0.0865934	0.767629	71	368	284	356	581	130	247	128	126	265	179	653	146	317	292	118	290	398	783	106	39	368	35	91	276	1652	52	530	477	187	236	247	498	365	23	412	875	581	305	165	259	634	584	618
OAF	0.293811	3.91923	2.93635	0.0866064	0.767629	192	181	372	429	267	188	351	194	234	384	517	266	316	277	439	222	339	332	533	177	300	299	198	228	227	141	298	126	250	299	308	563	117	341	203	236	102	200	255	236	298	275	434	192
RAD51D	-0.175887	3.15934	2.93535	0.0866599	0.767629	302	352	171	351	294	146	207	192	128	208	228	190	165	252	281	136	272	293	256	225	151	195	114	167	266	346	167	315	283	132	254	205	222	201	161	188	351	204	181	182	98	155	181	392
ADAM23	0.478023	-0.904535	2.93378	0.0867444	0.767629	17	6	20	27	0	7	24	11	2	0	5	7	3	1	22	0	7	11	29	24	3	12	9	0	6	3	15	17	26	8	9	17	21	13	3	3	14	8	14	0	7	4	4	12
ZNF91	-0.288888	6.06944	2.93302	0.0867851	0.767629	1709	1940	1857	3113	2801	1366	1572	1870	1202	1663	1360	2703	1363	2128	2389	966	3364	2100	2290	1173	929	1263	909	1115	1716	3342	994	3761	2903	1097	1837	2059	2623	2445	860	2208	3157	1693	1488	2482	1735	2280	2957	2914
CYP7B1	0.271263	2.92368	2.93162	0.0868602	0.767629	147	116	185	66	123	219	265	177	80	231	148	106	181	256	278	253	143	154	155	150	141	110	141	245	178	80	189	151	224	108	136	82	79	111	169	141	117	205	156	125	137	146	89	125
SIL1	-0.210553	5.91285	2.93124	0.0868807	0.767629	2048	2830	1702	3353	3689	824	1333	956	843	896	1267	2304	1283	1970	1386	946	3229	1488	2530	699	894	1202	940	935	2436	2790	932	1970	1864	642	1042	1078	1713	1501	882	959	1626	1634	1243	1782	1372	1544	1762	3043
ELMO2	-0.156626	5.33834	2.93087	0.0869004	0.767629	1076	1710	773	1681	1457	746	997	914	641	749	936	1295	698	1127	800	583	1629	832	1523	622	708	811	811	914	1425	2085	816	1474	1091	735	1000	966	1226	1206	660	986	1157	1316	850	1067	555	1037	1128	1541
DEK	0.119849	6.15012	2.92995	0.08695	0.767629	1606	1543	1609	2516	1729	1616	1892	2112	1593	2017	1945	1722	1764	1802	2253	1286	2562	1463	2261	1062	1458	1239	1300	1337	1308	1344	1453	1469	1775	1522	1426	1890	1527	1683	1527	1884	1562	1940	1944	2198	2029	1956	2084	2117
RBPJ	-0.183754	6.72579	2.92919	0.0869913	0.767629	2766	2515	3105	3160	2679	3259	3333	3152	2570	2674	3234	2657	2818	4244	5076	2595	3418	2598	3567	1875	2496	2300	2520	3457	3311	2374	2281	2660	3154	2419	2487	3059	2618	3437	3232	3347	2630	3477	3506	3133	4134	4320	3645	2800
ENTREP1	0.400416	0.96425	2.92797	0.0870571	0.767629	28	13	28	3	46	40	85	23	11	26	57	20	30	32	41	48	36	32	16	60	74	16	7	68	15	10	38	15	29	21	23	28	18	22	47	42	9	28	45	27	78	8	12	22
SPARCL1	0.568226	4.22072	2.92685	0.0871171	0.767629	117	342	497	1338	838	68	163	162	266	116	240	686	214	44	275	374	787	388	497	247	15	363	72	58	582	2149	171	512	164	307	340	409	283	289	26	557	355	214	950	1957	924	325	537	2334
SLC2A12	-0.296361	2.36674	2.92507	0.0872133	0.767629	95	51	132	173	154	29	70	79	97	50	116	158	72	136	165	45	215	146	137	46	34	139	88	69	157	125	37	223	176	51	125	184	229	134	31	144	209	149	82	227	145	148	164	293
IL15RA	0.239324	3.74333	2.92502	0.0872164	0.767629	352	311	247	212	312	315	495	388	278	227	539	250	406	305	360	409	245	306	414	263	322	180	329	393	343	176	430	105	347	259	259	313	134	271	354	235	175	271	305	177	182	286	249	181
EPC2	0.207286	4.04373	2.92458	0.0872397	0.767629	313	195	332	532	431	288	277	332	191	283	264	399	285	410	554	281	568	291	299	238	324	233	238	326	337	298	136	446	415	256	281	236	324	375	240	335	356	323	418	401	303	388	425	411
MYO10	0.186998	6.83653	2.9241	0.0872659	0.767629	2061	1850	2289	2136	2268	3172	2861	2902	3346	3677	2957	2391	1867	2205	2520	2846	2346	3584	3383	2305	1803	2164	2142	1944	1572	1725	2799	1864	2718	2643	2358	2009	2107	2683	2675	3257	1748	2822	3261	3120	1930	2760	2665	2939
TRPM2	0.603114	0.315582	2.92012	0.0874813	0.768891	14	13	11	25	27	1	16	15	10	4	16	31	11	21	26	13	30	6	19	6	0	5	0	5	32	34	3	22	29	6	24	21	17	0	1	1	34	8	9	5	5	36	9	15
COL4A3	0.292594	0.810836	2.91959	0.08751	0.768891	8	21	28	42	55	31	59	59	25	32	27	40	25	66	53	34	47	31	53	35	23	25	37	12	35	32	37	56	53	22	22	19	23	45	45	27	28	56	56	21	8	40	14	25
CYTH4	0.593106	-1.21018	2.91686	0.0876585	0.769021	9	23	0	6	18	5	0	4	0	0	3	17	5	14	4	12	2	5	5	3	1	22	2	8	21	6	7	6	28	0	4	6	2	2	1	0	5	9	18	21	3	13	4	2
RTP4	-0.311375	3.19876	2.91547	0.087734	0.769021	236	367	311	170	275	227	520	249	118	132	329	188	243	431	723	184	378	142	262	214	270	168	337	652	211	121	102	105	243	130	79	120	165	240	534	319	262	398	215	160	417	405	147	208
CCR6	0.48634	-1.21541	2.91482	0.0877693	0.769021	1	35	7	24	11	5	3	12	0	9	4	1	1	22	28	12	26	9	16	10	9	3	0	1	26	16	11	1	20	1	3	15	4	16	3	1	15	9	12	2	5	5	13	2
TRIM29	-0.52286	1.11034	2.91473	0.0877743	0.769021	196	263	50	23	41	94	98	64	82	13	75	39	35	42	8	14	12	36	44	55	85	43	61	80	81	34	6	7	50	13	32	35	5	297	67	105	16	177	33	40	32	48	40	20
IRGQ	-0.156288	5.4012	2.91288	0.0878747	0.769021	1634	1590	891	1210	1215	949	1154	1168	781	933	1250	1308	810	982	1096	857	1545	1041	1377	690	1090	1069	1112	1017	1174	1772	1225	1144	1398	1040	1231	1071	1081	1638	1080	1145	992	1277	1003	1311	740	1107	1319	1184
ATP5F1A	-0.233905	9.1246	2.91255	0.0878928	0.769021	17458	15355	17363	17226	15099	13857	15465	15920	11622	13826	17014	17356	14350	21397	19930	12161	15687	15149	18158	11027	13170	11996	15987	18168	21691	19860	13498	20654	22406	14160	14718	13789	17322	17340	20204	17582	16277	21100	15777	17460	16382	23383	19584	20907
WFDC3	0.520936	-0.258911	2.91212	0.0879163	0.769021	49	16	21	18	1	25	5	7	1	8	49	19	32	32	28	22	40	23	1	2	45	20	0	35	56	5	12	17	6	36	3	13	32	39	22	4	0	23	14	18	33	10	25	21
ITGA1	0.33896	5.39819	2.91192	0.0879269	0.769021	560	762	1528	1303	1681	364	1302	455	731	396	256	959	662	1219	2087	400	1855	1651	3667	616	177	1286	363	611	1470	1720	689	1339	1735	556	832	1344	1239	674	270	657	1314	501	804	1691	924	1075	1977	1410
GBP2	0.339577	6.25608	2.90567	0.0882685	0.771568	2696	2810	1953	1241	1875	2520	3434	1726	774	1091	2968	1245	2299	1965	2879	875	2636	909	4858	826	3076	1343	1734	3755	4095	1074	1677	353	1193	1447	646	1842	1141	1708	4244	1498	1090	3183	1088	1053	2170	2210	2213	1132
DIO1	-0.687166	-1.14989	2.90413	0.0883527	0.771862	0	6	6	9	1	5	30	12	26	0	5	1	0	0	0	1	14	23	2	4	0	22	8	12	6	5	6	134	19	7	23	20	12	42	0	9	24	14	3	1	8	16	27	23
TTC3	-0.192622	7.80743	2.90112	0.0885179	0.772338	3455	4678	6110	11346	9648	3211	5269	6260	5028	5176	3991	9243	3898	8062	8996	3593	10085	5618	6487	4052	2715	4304	3378	3477	4196	7730	3246	10516	8144	3219	4775	3988	6729	6221	3529	5552	7217	5020	4612	6785	4825	6370	6411	8874
DICER1	0.117534	6.40819	2.90062	0.0885454	0.772338	1505	1560	1820	2790	2390	2034	2372	2679	2374	2540	1800	2431	2174	2225	2345	1608	3153	1887	3128	1291	1862	1354	1462	1832	1238	1392	1588	1818	2293	1479	1543	2357	1774	2243	1939	2337	2133	2433	1913	2709	1473	2123	2559	2783
INTS14	-0.126729	4.73895	2.90038	0.0885586	0.772338	1154	1078	659	833	664	565	728	534	333	642	608	743	654	912	619	517	839	546	691	363	476	528	499	559	953	1299	523	657	751	557	616	647	741	684	828	739	667	689	685	800	770	776	803	833
VIL1	-0.216362	5.16189	2.89635	0.0887805	0.77341	1546	2007	1174	431	810	883	1142	806	737	422	869	786	659	928	869	465	519	435	764	708	1075	625	890	633	1072	1088	1048	726	1248	547	769	395	1099	1301	1021	456	938	1409	820	571	575	1073	963	1166
KIF4A	-0.746663	-0.775088	2.89583	0.0888091	0.77341	0	24	38	7	7	0	12	15	8	9	0	1	0	16	55	0	2	78	49	9	0	19	0	0	6	20	8	14	62	24	1	14	13	29	8	0	79	35	8	9	19	50	11	22
KPTN	-0.321898	1.75589	2.89539	0.0888332	0.77341	57	42	75	108	99	39	93	52	63	54	60	57	45	70	60	58	67	97	79	65	66	40	107	36	68	28	64	60	84	30	59	62	45	73	57	57	50	70	33	35	37	66	45	71
RIDA	-0.2995	4.19844	2.89294	0.0889684	0.773916	440	349	795	711	426	497	997	593	386	490	609	541	430	886	915	513	700	503	524	344	538	391	421	950	748	348	328	511	714	306	332	323	413	451	744	539	548	717	555	482	676	918	548	719
TRIT1	-0.179536	4.2175	2.8925	0.0889925	0.773916	668	751	490	466	537	617	385	523	283	532	892	598	327	277	493	542	466	398	607	258	366	398	397	558	641	624	490	447	514	446	558	628	554	634	466	507	414	632	625	811	533	497	553	526
GJD3	0.604995	0.623962	2.89081	0.089086	0.773928	22	17	13	28	20	9	27	5	2	9	6	15	12	43	15	15	22	10	29	4	9	17	3	7	4	7	15	10	35	4	20	8	19	10	10	8	17	16	9	6	1	20	9	15
BRWD1	0.124849	6.09689	2.89065	0.089095	0.773928	954	1273	2140	2815	1692	1431	2256	2086	1500	1528	1509	1596	1687	2065	2853	1252	2512	1456	2268	1308	1705	1148	1557	1731	1269	1137	1343	1869	2031	1310	1467	1512	1481	2013	1435	1991	1822	1924	1595	2097	1767	1801	1881	2413
HSF2	-0.225214	4.53781	2.8871	0.0892918	0.77491	796	706	728	868	689	476	458	581	530	382	572	783	519	843	651	415	945	624	929	313	424	465	529	640	663	1201	443	735	753	590	561	683	838	703	541	635	934	704	627	759	1003	673	941	985
COG4	-0.161019	5.09948	2.88678	0.0893094	0.77491	1239	1701	775	967	1015	547	951	600	374	657	674	601	679	516	712	548	1390	681	916	428	681	728	530	928	1924	1757	583	950	1039	641	650	767	1018	950	928	649	762	1129	848	949	562	1048	950	1439
CDK11A	0.193856	4.35023	2.88488	0.0894148	0.775111	321	437	343	491	523	180	557	460	249	366	385	357	358	373	384	488	557	432	633	237	434	358	391	371	436	443	345	482	660	366	497	515	497	627	461	440	476	391	473	683	162	531	415	657
SHISAL2B	-0.530655	3.78052	2.88453	0.0894339	0.775111	190	154	187	892	400	52	110	167	113	230	136	314	167	202	172	474	340	773	271	140	85	317	280	107	170	801	58	304	216	39	357	151	216	694	4	609	528	480	350	715	154	518	274	768
CRLF3	0.178114	3.11195	2.8834	0.0894971	0.775219	189	224	140	249	222	190	181	165	190	222	211	150	115	147	111	183	309	267	384	135	127	170	183	139	175	346	199	270	187	202	245	289	211	268	173	156	241	168	204	229	112	195	191	330
CISD3	-0.123234	4.53579	2.88139	0.0896089	0.775318	708	628	655	762	661	457	721	538	360	484	649	531	575	785	679	443	650	621	724	410	650	432	471	477	516	594	405	503	675	366	413	551	464	539	577	477	437	677	464	605	429	695	694	564
ERCC4	-0.159378	3.93108	2.88079	0.0896422	0.775318	390	477	540	599	496	394	476	398	360	403	490	396	301	627	485	270	651	373	539	245	362	390	208	317	374	529	333	518	575	399	357	424	383	520	462	330	448	382	457	386	310	561	575	576
[truncated: 17,290 more rows]
[truncated: 41 more columns]

## Sheet: asplund_data
HGNC symbol	genes	logFC	P.Value	FDR
[truncated: 284 more rows]

[truncated: 3 more sheets: marselli_vs_asplund_deg_merge, t2d_effector_summary, t2dkp_vs_marselli]
